# Supplementary material for: Decomposing land surface total water storage in the Indus, Ganges, and Brahmaputra basins
Source: Frontiers journal article supplement (doi:10.3389/feart.2025.1551218), 2025-09-05
Supplement: Table_1.xlsx [file Table_1.xlsx]

## Sheet: Indus
Date	Year	Month	TWS_anom	TWS-GRACE	TWS		Aqf_Storage	glVolume	grdWater	irrRffStorage	resStorage	ricePaddyStrg	snowPack	soilMoist	surfRffStorage	UGW	smResStrg	endoStrg		precip	discharge	evapotrans	runoff	baseflow	surfRunoff	glMelt	irrigationGross	domUseGross	indUseGross	stkUseGross
1990-01-15	1990	1	20.5259		3246.97		2940.73	285.995	0.724474	0.212094	5.94883	0.0429425	10.8862	2.40783	0.0209595	0	0	0		4.83357	2.07453	1.66745	1.75009	0.390748	1.35934	0	1.43019	0.0493926	0.0129992	0.00835419
1990-02-15	1990	2	23.7648		3250.2		2940.82	286.253	0.792744	0.191331	5.69604	0.0429425	13.7207	2.63859	0.0479753	0	0	0		6.98989	1.26773	1.87162	2.34764	0.38876	1.95888	0	0.611229	0.0446127	0.0117412	0.00757792
1990-03-15	1990	3	26.1131		3252.55		2940.99	286.538	0.960105	0.189595	5.4557	0.0429425	15.5295	2.68648	0.156433	0	0	0		7.69746	1.55322	2.33613	3.05279	0.525991	2.5268	0	1.78847	0.0493926	0.0129992	0.00900488
1990-04-15	1990	4	28.3259		3254.77		2941	286.746	1.23218	0.501597	5.5342	0	17.1392	2.55481	0.0544089	0	0	0		3.82481	1.62466	2.6687	2.99509	0.653724	2.34137	1.71363e-06	2.83397	0.0477993	0.0125799	0.0097458
1990-05-15	1990	5	25.9341		3252.37		2940.87	286.778	1.17805	0.666189	4.74248	0.0280185	15.5173	2.4961	0.0955924	0	0	0		1.66482	0.959119	3.06611	4.04501	0.633748	3.41127	0.00578435	3.69376	0.0493926	0.0129992	0.0111569
1990-06-15	1990	6	23.7109		3250.15		2940.85	286.756	1.59674	0.477164	5.56578	0.0280185	12.3527	2.33776	0.187022	0	0	0		3.41163	0.699633	2.36456	3.52691	0.832553	2.69436	0.105507	0.536737	0.0477993	0.0125799	0.0110631
1990-07-15	1990	7	24.5741		3251.01		2941.16	285.882	2.46411	0.542509	9.72759	0.120208	7.62262	2.94338	0.555972	0	0	0		9.13797	3.04432	6.04527	6.26246	1.31428	4.94818	1.04672	2.66917	0.0493926	0.0129992	0.0113184
1990-08-15	1990	8	23.2566		3249.7		2941.46	284.713	2.28759	0.456277	10.934	0.0945678	6.35817	3.13574	0.26	0	0	0		11.4225	4.0343	6.96758	4.93806	1.23254	3.70552	1.35536	1.95566	0.0493926	0.0129992	0.0110881
1990-09-15	1990	9	20.8176		3247.26		2941.73	284.497	1.92816	0.660895	9.23952	0.141288	6.16766	2.7429	0.15195	0	0	0		5.5886	4.04774	4.59384	3.78481	1.00321	2.78159	0.294406	3.08719	0.0477993	0.0125799	0.0105312
1990-10-15	1990	10	17.1131		3243.55		2941.73	284.585	1.21349	0.593023	6.5499	0.141312	6.41013	2.32504	0.0075265	0	0	0		1.35829	2.30921	1.94431	2.2766	0.645927	1.63067	1.76443e-05	2.90889	0.0493926	0.0129992	0.00990667
1990-11-15	1990	11	15.6994		3242.14		2941.66	284.626	0.91494	0.446368	5.52082	0.0842259	6.90872	1.97328	0.0060259	0	0	0		0.798464	0.539916	0.596132	1.19581	0.476956	0.718853	0	0.521701	0.0477993	0.0125799	0.008823
1990-12-15	1990	12	16.6429		3243.08		2940.67	284.98	0.651798	0.793679	5.46526	0	8.01369	2.47121	0.0332489	0	0	0		6.15719	0.530625	1.00831	3.1722	0.351075	2.82112	0	5.05831	0.0493926	0.0129992	0.00822647
1991-01-15	1991	1	19.755		3246.19		2940.68	285.265	0.659395	0.190483	5.76156	0.0435474	11.0717	2.48752	0.031306	0	0	0		3.15884	1.97455	1.3836	1.57617	0.356634	1.21954	0	1.27693	0.0494952	0.0127748	0.00803179
1991-02-15	1991	2	22.7871		3249.23		2940.79	285.529	0.780017	0.23661	5.49831	0.0435474	13.7148	2.57272	0.0586573	0	0	0		5.66461	1.36252	1.64542	2.34526	0.385395	1.95986	0	0.917866	0.0447054	0.0115385	0.00756392
1991-03-15	1991	3	25.7754		3252.22		2940.9	285.852	0.938161	0.242819	5.16304	0.0435474	16.3763	2.62265	0.0785989	0	0	0		7.88138	1.43431	2.49543	3.10305	0.515094	2.58795	0	2.39323	0.0494952	0.0127748	0.00913756
1991-04-15	1991	4	28.7178		3255.16		2940.96	286.094	1.41512	0.410484	5.97422	0	17.5913	2.5905	0.121196	0	0	0		6.62863	1.64453	2.81762	3.80359	0.756914	3.04668	2.29504e-06	1.76794	0.0478986	0.0123627	0.0095193
1991-05-15	1991	5	27.8332		3254.27		2940.89	286.337	1.4076	0.556765	5.15166	0.0285293	17.329	2.45511	0.114507	0	0	0		5.0174	1.80956	3.25661	4.08986	0.766956	3.32291	0.00131459	3.26137	0.0494952	0.0127748	0.0106705
1991-06-15	1991	6	26.2122		3252.65		2940.82	286.364	1.77397	0.490101	5.68177	0.0285293	15.052	2.31584	0.12441	0	0	0		2.83396	1.25984	2.19155	3.25604	0.932108	2.32393	0.0183049	0.525545	0.0478986	0.0123627	0.0109851
1991-07-15	1991	7	23.9723		3250.41		2940.8	286.131	1.99506	0.834875	6.49679	0.121745	11.2205	2.48767	0.325511	0	0	0		6.3568	2.28122	5.38207	5.86831	1.06143	4.80688	0.354512	3.77033	0.0494952	0.0127748	0.0114468
1991-08-15	1991	8	22.9152		3249.35		2940.96	285.605	2.19337	0.698474	9.18165	0.0955962	7.57482	2.77128	0.27018	0	0	0		7.44193	2.51452	5.5253	5.18257	1.17273	4.00984	0.699193	2.8456	0.0494952	0.0127748	0.0111656
1991-09-15	1991	9	20.8195		3247.26		2941.09	285.598	1.79577	0.848029	8.14094	0.142969	6.88632	2.69886	0.0611551	0	0	0		4.92791	2.33359	4.39572	3.70983	0.922203	2.78763	0.150192	3.56984	0.0478986	0.0123627	0.0104082
1991-10-15	1991	10	18.0792		3244.52		2941.12	285.669	1.19891	0.664124	6.11755	0.142992	7.29589	2.29977	0.00672086	0	0	0		0.9914	1.88957	1.90939	2.41221	0.631221	1.78098	2.33992e-06	2.92319	0.0494952	0.0127748	0.00980592
1991-11-15	1991	11	16.5356		3242.98		2941.08	285.713	0.871933	0.477043	5.2061	0.0852977	7.65867	1.87696	0.0059481	0	0	0		0.816741	0.535878	0.53677	1.17034	0.447676	0.72266	0	0.526705	0.0478986	0.0123627	0.0086796
1991-12-15	1991	12	17.2484		3243.69		2939.87	285.932	0.614338	0.882173	5.26429	0	8.62579	2.49324	0.0081334	0	0	0		3.06281	0.644961	1.17655	2.99858	0.326463	2.67212	0	5.46421	0.0494952	0.0127748	0.00842797
1992-01-15	1992	1	18.4027		3244.84		2939.87	286.116	0.548461	0.173103	5.05291	0.0441473	10.5434	2.43866	0.0529148	0	0	0		7.72245	1.85137	1.50508	1.92159	0.293338	1.62825	0	0.784262	0.049835	0.0125996	0.00817997
1992-02-15	1992	2	23.6368		3250.08		2940.13	286.303	0.864381	0.161936	5.41945	0.0441473	14.2216	2.8591	0.0736305	0	0	0		5.33907	1.91938	1.90963	2.18277	0.442142	1.74062	0	1.00909	0.0466198	0.0117868	0.00785378
1992-03-15	1992	3	25.8693		3252.31		2940.21	286.755	0.923403	0.245128	4.7506	0.0441473	16.5989	2.67413	0.10394	0	0	0		9.05112	1.13062	2.34189	3.14304	0.506281	2.63676	0	2.15982	0.049835	0.0125996	0.00904394
1992-04-15	1992	4	28.9083		3255.35		2940.26	286.931	1.2532	0.441585	5.16975	0	18.6632	2.54593	0.0799083	0	0	0		4.75845	1.61069	2.84066	3.30803	0.667271	2.64076	2.08084e-06	2.11192	0.0482274	0.0121932	0.0095241
1992-05-15	1992	5	28.082		3254.52		2940.2	287.1	1.27155	0.55827	4.70621	0.0290402	18.1284	2.44395	0.0849499	0	0	0		3.41997	1.51728	2.87656	3.71755	0.689939	3.02761	0.000670768	3.35032	0.049835	0.0125996	0.0106804
1992-06-15	1992	6	26.1083		3252.55		2940.17	287.134	1.64549	0.470557	4.88568	0.0290402	15.8155	2.25165	0.142584	0	0	0		2.38832	1.36784	1.99422	3.27718	0.861177	2.41601	0.0238639	0.607248	0.0482274	0.0121932	0.0110409
1992-07-15	1992	7	25.2645		3251.7		2940.32	286.805	2.20979	0.645123	7.44868	0.123286	10.8542	2.86461	0.429542	0	0	0		9.41979	1.83908	6.60468	6.42524	1.17247	5.25278	0.518546	2.81914	0.049835	0.0125996	0.0111547
1992-08-15	1992	8	25.7404		3252.18		2940.74	285.939	2.72261	0.374348	11.053	0.0966184	7.41861	3.4345	0.397249	0	0	0		10.6169	5.57713	6.78354	5.9562	1.45872	4.49747	1.06542	2.27659	0.049835	0.0125996	0.0110205
1992-09-15	1992	9	24.5865		3251.03		2941.12	286.102	2.53224	0.500902	10.3132	0.144646	6.98953	3.06834	0.256041	0	0	0		7.96978	4.6491	4.54091	4.80846	1.31222	3.49624	0.0608004	2.5997	0.0482274	0.0121932	0.0102087
1992-10-15	1992	10	20.176		3246.62		2941.06	286.213	1.59787	0.605952	7.17816	0.144669	7.35907	2.44714	0.00820277	0	0	0		1.76122	2.74824	2.08808	2.68063	0.847847	1.83279	2.22293e-05	2.87402	0.049835	0.0125996	0.00993984
1992-11-15	1992	11	18.5691		3245.01		2941.01	286.271	1.10695	0.442288	6.19151	0.086374	7.76608	2.12952	0.00723609	0	0	0		1.49267	0.84563	0.631102	1.39017	0.572518	0.817656	0	0.482853	0.0482274	0.0121932	0.0087492
1992-12-15	1992	12	18.6198		3245.06		2940.09	286.425	0.734065	0.761724	6.04008	0	8.58337	2.423	0.00708652	0	0	0		2.3677	0.486819	1.12398	2.76847	0.392187	2.37628	0	5.02982	0.049835	0.0125996	0.00849462
1993-01-15	1993	1	20.59		3247.03		2940.06	286.785	0.606253	0.212527	5.9972	0.0447437	10.823	2.48609	0.0149807	0	0	0		3.7963	1.80485	1.38709	1.50076	0.322808	1.17795	0	1.42044	0.0501555	0.0124239	0.0080507
1993-02-15	1993	2	20.2341		3246.67		2940	286.973	0.513894	0.367332	4.73947	0.0447437	11.5904	2.42425	0.0204399	0	0	0		3.29986	0.627688	1.68599	2.16366	0.244093	1.91957	0	1.68073	0.0453018	0.0112216	0.00794892
1993-03-15	1993	3	23.4717		3249.91		2940.09	287.309	0.701993	0.240053	4.88168	0.0447437	13.999	2.54224	0.100411	0	0	0		7.92055	0.645151	2.20055	2.86849	0.379206	2.48928	0	2.20842	0.0501555	0.0124239	0.00902255
1993-04-15	1993	4	24.5068		3250.95		2939.97	287.382	0.883367	0.530083	4.46216	0	15.2103	2.45358	0.0497432	0	0	0		2.61557	1.19366	2.73287	2.76557	0.465301	2.30027	2.66225e-06	3.04383	0.0485376	0.0120231	0.0099219
1993-05-15	1993	5	23.2629		3249.7		2939.85	287.617	1.0665	0.702416	4.17691	0.0295512	13.6183	2.53467	0.108378	0	0	0		3.46534	0.565726	3.17236	4.20302	0.569999	3.63302	0.00718217	3.69852	0.0501555	0.0124239	0.0111761
1993-06-15	1993	6	22.1194		3248.56		2939.83	287.657	1.52719	0.479227	5.08629	0.0295512	11.4471	2.37068	0.133653	0	0	0		4.16499	0.578522	2.44804	3.29058	0.796355	2.49422	0.0723546	0.562673	0.0485376	0.0120231	0.0111084
1993-07-15	1993	7	26.1845		3252.62		2940.37	287.489	2.50095	0.596895	8.75471	0.12482	8.88816	3.14077	0.760147	0	0	0		14.1783	3.15323	6.48363	7.37709	1.34026	6.03684	0.474108	2.93328	0.0501555	0.0124239	0.0111885
1993-08-15	1993	8	23.0551		3249.49		2940.48	287.017	2.0315	0.772835	8.71419	0.0976411	7.73052	2.54546	0.103348	0	0	0		3.56029	3.70877	4.96323	3.89952	1.08709	2.81243	0.604395	4.02627	0.0501555	0.0124239	0.0113395
1993-09-15	1993	9	20.5059		3246.95		2940.49	287.005	1.43224	0.886259	7.08041	0.14632	7.35355	2.52393	0.0306721	0	0	0		4.71471	1.65355	4.28526	3.41676	0.730717	2.68604	0.115909	3.4528	0.0485376	0.0120231	0.0104952
1993-10-15	1993	10	17.8078		3244.25		2940.51	287.083	0.934237	0.718214	5.00844	0.146341	7.60244	2.23798	0.00678052	0	0	0		1.11616	1.3949	1.88034	2.3719	0.486796	1.8851	2.67826e-05	3.14621	0.0501555	0.0124239	0.0100059
1993-11-15	1993	11	17.4178		3243.86		2940.49	287.271	0.728782	0.520133	4.34286	0.0874554	8.33689	2.0661	0.0112826	0	0	0		2.3005	0.635817	0.73124	1.33867	0.373191	0.965475	0	0.52398	0.0485376	0.0120231	0.0089313
1993-12-15	1993	12	17.4241		3243.86		2939.26	287.38	0.497771	0.874733	4.3089	0	9.15476	2.38191	0.00609276	0	0	0		0.966828	0.447846	0.824839	2.73192	0.262316	2.46961	0	5.41631	0.0501555	0.0124239	0.00846238
1994-01-15	1994	1	17.6105		3244.05		2939.19	287.55	0.348272	0.264483	3.79948	0.0453364	10.6387	2.20116	0.0138905	0	0	0		4.27013	1.56315	1.3143	1.39577	0.180203	1.21557	0	1.68253	0.05045	0.0122469	0.00824073
1994-02-15	1994	2	20.7217		3247.16		2939.18	287.791	0.423153	0.26385	3.41666	0.0453364	13.4921	2.5217	0.0231265	0	0	0		4.85308	0.619037	1.58806	1.95737	0.203718	1.75365	0	1.04361	0.0455678	0.0110617	0.00759556
1994-03-15	1994	3	21.9091		3248.35		2939.18	288.015	0.533449	0.328056	2.82493	0.0453364	14.9654	2.42388	0.0353006	0	0	0		4.09015	0.94909	2.57205	2.34579	0.284851	2.06094	0	3.28169	0.05045	0.0122469	0.00951948
1994-04-15	1994	4	24.7691		3251.21		2938.96	288.358	0.885643	0.558007	3.295	0	16.6175	2.45267	0.0808736	0	0	0		6.37727	0.179315	2.49491	3.26562	0.466716	2.7989	6.12011e-08	2.44211	0.0488226	0.0118518	0.0096453
1994-05-15	1994	5	24.8334		3251.27		2938.84	288.466	0.975966	0.63145	3.34847	0.0300623	16.4773	2.44021	0.0664262	0	0	0		2.95883	0.863536	3.10951	3.61145	0.524072	3.08738	0.00154761	3.84834	0.05045	0.0122469	0.0110524
1994-06-15	1994	6	23.1766		3249.62		2938.72	288.486	1.49267	0.610581	3.7979	0.0300623	13.9751	2.32951	0.175269	0	0	0		3.96109	0.415954	2.45645	3.57521	0.778077	2.79714	0.07993	0.562221	0.0488226	0.0118518	0.0112431
1994-07-15	1994	7	26.37		3252.81		2939.4	287.331	2.8613	0.383442	9.44971	0.12635	8.84672	3.71187	0.702545	0	0	0		17.0007	3.61383	8.54798	8.32926	1.53712	6.79214	1.40327	1.50833	0.05045	0.0122469	0.0111414
1994-08-15	1994	8	25.6634		3252.1		2939.88	285.887	3.01123	0.380127	11.7886	0.09866	7.08563	3.60912	0.365082	0	0	0		11.8303	6.22351	7.12686	5.98876	1.63034	4.35842	1.67093	2.18307	0.05045	0.0122469	0.0111141
1994-09-15	1994	9	23.4192		3249.86		2940.22	285.955	2.52667	0.506642	10.2807	0.147983	6.86025	3.23521	0.124776	0	0	0		5.65551	7.07809	4.88146	4.00549	1.31694	2.68855	0.0635392	3.01192	0.0488226	0.0118518	0.0102573
1994-10-15	1994	10	18.2169		3244.66		2940.14	286.057	1.50757	0.638716	6.52543	0.148003	7.22579	2.40408	0.00816821	0	0	0		1.86837	1.51529	1.98766	2.67466	0.803409	1.87125	3.16206e-08	2.92036	0.05045	0.0122469	0.00989365
1994-11-15	1994	11	17.0275		3243.47		2940.09	286.086	1.05465	0.44278	5.85259	0.0885421	7.73638	2.11445	0.00596443	0	0	0		0.603502	0.805899	0.566675	1.24875	0.548385	0.700368	0	0.548594	0.0488226	0.0118518	0.0089364
1994-12-15	1994	12	18.0047		3244.44		2939.05	286.342	0.774753	0.791202	5.94951	0	8.95437	2.55415	0.0245873	0	0	0		4.93552	0.579077	1.14759	3.23219	0.416418	2.81577	0	5.09907	0.05045	0.0122469	0.00837279
1995-01-15	1995	1	19.3346		3245.77		2939.01	286.559	0.609274	0.16356	5.78229	0.045897	11.0861	2.50731	0.0106693	0	0	0		2.50472	2.00341	1.33462	1.15013	0.32635	0.823778	0	1.20821	0.0573109	0.0136524	0.00812324
1995-02-15	1995	2	20.0712		3246.51		2939.03	286.746	0.553241	0.29812	4.81225	0.045897	12.4132	2.56823	0.0432502	0	0	0		4.51866	0.652601	1.69336	2.18189	0.266448	1.91544	0	1.15796	0.0517647	0.0123312	0.00775124
1995-03-15	1995	3	21.4337		3247.87		2939.06	287.029	0.631158	0.258479	4.46199	0.045897	13.7246	2.57085	0.091582	0	0	0		5.99786	1.14088	2.42522	2.65976	0.339967	2.3198	0	2.52876	0.0573109	0.0136524	0.00917476
1995-04-15	1995	4	24.8187		3251.26		2939.02	287.306	1.18885	0.443208	5.48832	0	15.0592	2.63347	0.119314	0	0	0		7.17821	1.02887	3.04248	3.90477	0.633135	3.27163	4.22288e-06	1.96004	0.0554622	0.013212	0.0096063
1995-05-15	1995	5	23.8807		3250.32		2938.91	287.498	1.29139	0.655873	4.85572	0.0305735	14.4531	2.56093	0.0659229	0	0	0		2.55972	2.20869	3.08788	3.78234	0.700513	3.08182	0.00396772	4.24893	0.0573109	0.0136524	0.0110766
1995-06-15	1995	6	22.3106		3248.75		2938.81	287.55	1.69394	0.605944	5.23815	0.0305735	12.3077	2.38213	0.135611	0	0	0		3.70858	0.525948	2.30825	3.44226	0.888152	2.5541	0.0635541	0.638024	0.0554622	0.013212	0.0112449
1995-07-15	1995	7	23.9442		3250.38		2939.24	286.965	2.44064	0.639584	8.37706	0.127855	8.77424	3.15912	0.662681	0	0	0		16.22	3.04553	7.14005	7.7699	1.31103	6.45887	0.885887	2.20446	0.0573109	0.0136524	0.0113507
1995-08-15	1995	8	27.2199		3253.66		2940	286.041	3.29093	0.276511	12.5006	0.0996541	7.09879	3.75031	0.605847	0	0	0		12.9855	7.02304	6.97941	6.76735	1.78756	4.97979	1.15161	1.7144	0.0573109	0.0136524	0.0110751
1995-09-15	1995	9	23.2077		3249.65		2940.22	286.153	2.4927	0.705534	9.72521	0.149611	7.01411	3.02572	0.165371	0	0	0		3.97578	5.55139	4.3054	3.94618	1.29786	2.64833	0.0528261	4.09527	0.0554622	0.013212	0.010551
1995-10-15	1995	10	18.6739		3245.11		2940.18	286.283	1.47526	0.685573	6.55431	0.149631	7.36749	2.41061	0.0112406	0	0	0		1.97299	2.01513	2.24036	2.76681	0.786785	1.98002	4.36364e-06	2.97904	0.0573109	0.0136524	0.0101513
1995-11-15	1995	11	17.2537		3243.69		2940.08	286.331	1.00811	0.499658	5.71906	0.0896307	7.83436	2.12	0.00695765	0	0	0		1.05879	0.574403	0.453034	1.31382	0.522604	0.791213	0	0.490444	0.0554622	0.013212	0.0088299
1995-12-15	1995	12	17.8731		3244.31		2939.15	286.481	0.682367	0.801228	5.58969	0	9.05538	2.54542	0.00926785	0	0	0		2.30957	0.51982	1.07659	2.78781	0.3655	2.42231	0	5.13406	0.0573109	0.0136524	0.00831358
1996-01-15	1996	1	18.3188		3244.76		2939.07	286.567	0.510318	0.209811	5.26922	0.0464499	10.6279	2.43882	0.0146784	0	0	0		4.06602	1.57654	1.37125	1.3834	0.271298	1.1121	0	1.29723	0.0576058	0.0134621	0.00814525
1996-02-15	1996	2	20.353		3246.79		2939.1	286.794	0.551618	0.281262	4.72834	0.0464499	12.5859	2.66053	0.0406206	0	0	0		5.5372	0.817847	1.81673	2.32513	0.275584	2.04955	0	1.19133	0.0538892	0.0125935	0.00812348
1996-03-15	1996	3	24.649		3251.09		2939.24	287.281	0.899407	0.262888	5.1594	0.0464499	15.313	2.76337	0.119118	0	0	0		8.92654	1.13408	2.77427	3.32228	0.488197	2.83408	0	2.63689	0.0576058	0.0134621	0.00950336
1996-04-15	1996	4	26.9169		3253.36		2938.94	287.547	1.06931	0.652489	4.82219	0	17.767	2.50222	0.0614274	0	0	0		4.29717	1.01089	2.5966	3.27104	0.561969	2.70907	9.94518e-06	3.23912	0.0557475	0.0130278	0.0100644
1996-05-15	1996	5	26.4547		3252.89		2938.79	287.801	1.02924	0.651084	4.30369	0.0310849	17.7719	2.44593	0.0715925	0	0	0		4.44017	0.762884	2.98795	3.82644	0.551883	3.27456	0.00117872	3.49628	0.0576058	0.0134621	0.0108748
1996-06-15	1996	6	26.6764		3253.12		2938.91	287.899	1.79892	0.442114	5.97888	0.0310849	15.2123	2.56707	0.276785	0	0	0		7.29079	0.765619	3.10675	4.64453	0.941249	3.70328	0.0698321	0.374431	0.0557475	0.0130278	0.0109863
1996-07-15	1996	7	27.1823		3253.62		2939.25	287.54	2.41566	0.620929	9.59218	0.129363	10.7119	2.94516	0.419468	0	0	0		7.36069	3.40645	5.93972	6.26691	1.28406	4.98286	0.521576	2.99133	0.0576058	0.0134621	0.0114291
1996-08-15	1996	8	26.9461		3253.39		2939.71	286.689	2.77199	0.471384	11.9729	0.10065	7.78178	3.35008	0.538259	0	0	0		11.6047	4.94887	6.00574	6.51116	1.48902	5.02214	1.10676	2.23537	0.0576058	0.0134621	0.0111826
1996-09-15	1996	9	22.7803		3249.22		2939.86	286.57	2.19055	0.688585	9.53353	0.151238	7.27015	2.88651	0.0736096	0	0	0		3.27862	5.63046	4.28181	3.55958	1.13107	2.42852	0.172783	3.63102	0.0557475	0.0130278	0.0106641
1996-10-15	1996	10	19.3119		3245.75		2939.85	286.72	1.38481	0.678855	6.70132	0.151257	7.73345	2.51929	0.0114254	0	0	0		2.50256	1.86251	2.19123	2.70877	0.731669	1.9771	1.42293e-06	2.93828	0.0576058	0.0134621	0.00998634
1996-11-15	1996	11	17.9508		3244.39		2939.77	286.798	1.01529	0.528713	5.80072	0.0907255	8.31556	2.06791	0.00672996	0	0	0		1.00659	0.523177	0.478689	1.32372	0.525331	0.798392	0	0.592375	0.0557475	0.0130278	0.0087186
1996-12-15	1996	12	17.6766		3244.12		2938.63	286.854	0.643987	0.880773	5.74761	0	8.92016	2.43358	0.00677699	0	0	0		0.923861	0.546573	0.79536	2.83345	0.342989	2.49046	0	5.44253	0.0576058	0.0134621	0.00832319
1997-01-15	1997	1	17.0458		3243.49		2938.55	287.035	0.425869	0.22664	5.21763	0.0469979	9.7341	2.24412	0.00901187	0	0	0		3.10904	1.64003	1.2745	1.32756	0.224116	1.10344	0	1.42483	0.0578829	0.0132801	0.00814525
1997-02-15	1997	2	17.545		3243.98		2938.5	287.137	0.343111	0.327559	4.16953	0.0469979	11.0253	2.42186	0.0109357	0	0	0		2.20816	0.802536	1.46911	1.60391	0.161847	1.44207	0	1.53397	0.0522813	0.0119949	0.00778484
1997-03-15	1997	3	19.4168		3245.86		2938.55	287.441	0.491898	0.282282	3.7367	0.0469979	12.7238	2.54876	0.0383302	0	0	0		6.98068	0.569951	2.55625	2.71968	0.26157	2.45811	0	2.30403	0.0578829	0.0132801	0.00921351
1997-04-15	1997	4	21.8921		3248.33		2938.51	287.559	0.923675	0.467008	4.13424	0	14.0684	2.59053	0.0741735	0	0	0		5.51208	0.777892	2.92137	3.24846	0.489607	2.75885	1.89724e-06	2.38673	0.0560157	0.0128517	0.0096819
1997-05-15	1997	5	22.1174		3248.56		2938.49	287.714	1.08821	0.472797	4.21245	0.0315963	13.8859	2.61122	0.0496539	0	0	0		4.1915	1.68678	3.16209	3.2505	0.592921	2.65758	0.000542483	2.87135	0.0578829	0.0132801	0.01065
1997-06-15	1997	6	21.0995		3247.54		2938.56	287.769	1.60848	0.396974	4.61506	0.0315963	11.7025	2.71469	0.139221	0	0	0		5.36656	0.71392	3.17959	3.80171	0.846535	2.95518	0.0570708	0.565788	0.0560157	0.0128517	0.0109251
1997-07-15	1997	7	20.3363		3246.78		2938.74	286.548	2.05337	0.669059	7.183	0.130863	8.10209	2.99175	0.356099	0	0	0		10.3259	2.12793	6.36843	5.93751	1.0948	4.84271	1.3821	2.84113	0.0578829	0.0132801	0.011545
1997-08-15	1997	8	21.8459		3248.29		2939.27	285.926	2.37306	0.46467	9.55383	0.101638	6.93308	3.19097	0.467586	0	0	0		11.8924	4.41867	6.2031	5.68367	1.28012	4.40355	0.898707	2.61851	0.0578829	0.0132801	0.0112344
1997-09-15	1997	9	20.0733		3246.51		2939.48	285.884	1.99266	0.797149	8.4854	0.152856	6.8239	2.78108	0.111423	0	0	0		3.2713	3.96116	4.21697	3.74206	1.02858	2.71348	0.119629	4.06542	0.0560157	0.0128517	0.0106824
1997-10-15	1997	10	17.2205		3243.66		2939.51	285.969	1.2651	0.541218	6.29402	0.152873	7.31169	2.60432	0.0110268	0	0	0		3.9952	1.68715	2.83893	2.62118	0.670855	1.95033	0.000349629	1.99312	0.0578829	0.0132801	0.00978236
1997-11-15	1997	11	16.6948		3243.13		2939.49	286.123	1.08499	0.368494	5.43032	0.0918272	8.19615	2.34143	0.00932395	0	0	0		2.51313	1.2479	0.83935	1.41564	0.566519	0.849125	0	0.59829	0.0560157	0.0128517	0.0087279
1997-12-15	1997	12	17.4873		3243.93		2938.78	286.261	0.71057	0.729503	5.09865	0	9.63731	2.70182	0.0077821	0	0	0		2.52759	0.520916	1.11575	2.67878	0.382239	2.29655	0	5.05984	0.0578829	0.0132801	0.00829591
1998-01-15	1998	1	17.8297		3244.27		2938.69	286.358	0.49368	0.236121	4.70843	0.0475412	11.3096	2.41718	0.0108346	0	0	0		3.32225	1.63779	1.36587	1.44874	0.262618	1.18612	0	1.60759	0.0581383	0.013109	0.008215
1998-02-15	1998	2	20.505		3246.94		2938.76	286.653	0.624708	0.279491	4.32523	0.0475412	13.5717	2.59546	0.0903511	0	0	0		6.41702	0.715727	1.77482	2.5948	0.305055	2.28975	0	1.20757	0.052512	0.0118404	0.00780136
1998-03-15	1998	3	23.8236		3250.26		2938.87	286.875	0.83894	0.234589	4.59496	0.0475412	16.0729	2.67275	0.0529463	0	0	0		5.47186	1.47145	2.44663	2.52762	0.459508	2.06811	0	2.44007	0.0581383	0.013109	0.00924172
1998-04-15	1998	4	23.8265		3250.27		2938.69	287.072	1.09034	0.602038	4.08711	0	16.0617	2.55459	0.112269	0	0	0		4.97188	0.73985	3.02681	3.76191	0.576337	3.18557	2.48171e-05	3.00375	0.0562629	0.0126861	0.0101844
1998-05-15	1998	5	23.6901		3250.13		2938.56	287.285	1.25756	0.686249	4.48897	0.0321078	15.1213	2.59603	0.101179	0	0	0		3.045	1.37426	3.20757	4.17466	0.677267	3.4974	0.00568288	4.04015	0.0581383	0.013109	0.0112682
1998-06-15	1998	6	21.9355		3248.38		2938.4	287.387	1.58599	0.612123	4.66785	0.0321078	13.1634	2.42833	0.102278	0	0	0		3.68548	0.593129	2.30237	3.17215	0.828782	2.34337	0.05523	0.652988	0.0562629	0.0126861	0.0112293
1998-07-15	1998	7	21.9992		3248.44		2938.72	286.639	2.24006	0.592185	7.83794	0.132364	8.81132	3.04983	0.415647	0	0	0		9.12314	2.38604	6.76146	6.15948	1.19546	4.96402	0.90274	2.80248	0.0581383	0.013109	0.0116104
1998-08-15	1998	8	18.2296		3244.67		2938.74	285.352	1.83072	0.767476	8.06405	0.102626	6.9675	2.76232	0.0827552	0	0	0		6.54963	3.42913	6.20885	3.98483	0.980346	3.00448	1.45297	3.56009	0.0581383	0.013109	0.0115422
1998-09-15	1998	9	15.793		3242.23		2938.83	285.358	1.31759	0.920253	6.24319	0.154473	6.78032	2.61115	0.0187301	0	0	0		4.43718	2.9577	4.53013	3.24378	0.674414	2.56936	0.153188	3.50271	0.0562629	0.0126861	0.0107007
1998-10-15	1998	10	13.3002		3239.74		2938.9	285.492	0.8742	0.625392	4.02316	0.15449	7.29398	2.36495	0.0134831	0	0	0		2.42642	1.61901	2.22253	2.25464	0.456681	1.79796	0.000705645	3.01242	0.0581383	0.013109	0.0104055
1998-11-15	1998	11	12.2438		3238.68		2938.86	285.504	0.664479	0.521583	3.09331	0.0929364	7.86345	2.07775	0.00662205	0	0	0		0.253148	0.49384	0.425571	1.08209	0.34086	0.741229	1.31582e-06	0.576914	0.0562629	0.0126861	0.0090549
1998-12-15	1998	12	11.2687		3237.71		2937.42	285.54	0.440519	0.898467	3.02436	0	8.03194	2.34488	0.00678056	0	0	0		0.490127	0.417513	0.767523	2.76637	0.231888	2.53448	3.16206e-08	5.59123	0.0581383	0.013109	0.00866884
1999-01-15	1999	1	12.4313		3238.87		2937.46	285.729	0.430323	0.206183	3.02016	0.0480801	9.50741	2.44267	0.0296531	0	0	0		5.75294	1.49423	1.62863	1.74234	0.229771	1.51257	0	1.19154	0.0583913	0.012936	0.00837155
1999-02-15	1999	2	14.4262		3240.87		2937.54	285.935	0.50471	0.243836	2.65833	0.0480801	11.4007	2.5172	0.0177642	0	0	0		4.02609	0.897979	2.04646	1.82391	0.244953	1.57895	0	1.21177	0.0527405	0.0116841	0.00808024
1999-03-15	1999	3	16.9533		3243.39		2937.59	286.319	0.653938	0.349601	2.44905	0.0480801	13.4777	2.4704	0.0383872	0	0	0		5.67958	0.797363	2.4473	2.62607	0.352802	2.27327	0	3.14685	0.0583913	0.012936	0.00961155
1999-04-15	1999	4	17.7848		3244.22		2937.1	286.605	0.753893	0.777795	1.8536	0	14.7514	2.34031	0.0475254	0	0	0		3.08272	0.31079	2.3393	3.09461	0.390811	2.7038	2.63165e-05	3.76032	0.0565077	0.0125187	0.0104931
1999-05-15	1999	5	17.3919		3243.83		2936.75	286.738	0.777583	0.79728	1.99031	0.0326174	14.2196	2.48025	0.0422962	0	0	0		2.54404	0.078044	3.06663	3.68514	0.410335	3.2748	0.00374799	4.06952	0.0583913	0.012936	0.0114753
1999-06-15	1999	6	16.2326		3242.67		2936.7	286.761	1.25935	0.557536	2.79608	0.0326194	12.1695	2.29107	0.104796	0	0	0		2.93606	0.160792	2.19835	2.89334	0.655018	2.23832	0.0622909	0.631549	0.0565077	0.0125187	0.0114369
1999-07-15	1999	7	16.348		3242.79		2936.81	286.209	1.71881	0.772582	5.63944	0.133866	8.53376	2.69073	0.274256	0	0	0		8.16095	1.21853	6.08433	5.52631	0.907955	4.61835	0.770884	3.38882	0.0583913	0.012936	0.0117629
1999-08-15	1999	8	16.2353		3242.67		2937.06	285.322	1.78252	0.628024	7.67967	0.103617	6.91411	3.06583	0.116328	0	0	0		7.47847	2.5599	6.19703	4.14294	0.949699	3.19324	1.11785	3.30684	0.0583913	0.012936	0.0114967
1999-09-15	1999	9	12.8659		3239.31		2937.04	285.181	1.2456	1.03965	5.27509	0.156066	6.75236	2.6009	0.0163999	0	0	0		4.05462	2.54553	4.4153	3.32667	0.630417	2.69625	0.25401	4.211	0.0565077	0.0125187	0.0109602
1999-10-15	1999	10	10.7558		3237.2		2937.15	285.22	0.857683	0.784384	3.76336	0.156082	6.94731	2.31076	0.00760905	0	0	0		0.719094	0.888971	2.09219	2.43707	0.444405	1.99267	0.000134419	3.44199	0.0583913	0.012936	0.0104991
1999-11-15	1999	11	10.5343		3236.97		2937.17	285.406	0.727082	0.593352	3.16487	0.0940277	7.77529	2.03368	0.0116302	0	0	0		2.33888	0.381822	0.73428	1.43555	0.372808	1.06274	0	0.575589	0.0565077	0.0125187	0.0091869
1999-12-15	1999	12	9.95558		3236.4		2935.7	285.419	0.48113	0.942021	3.20439	0	8.27093	2.37053	0.00678822	0	0	0		0.326537	0.643568	0.752839	2.85778	0.253451	2.60433	0	5.69817	0.0583913	0.012936	0.00869395
2000-01-15	2000	1	10.1055		3236.55		2935.72	285.642	0.380839	0.243177	2.82217	0.048615	9.37482	2.2929	0.016663	0	0	0		3.83829	1.46428	1.36666	1.40738	0.199456	1.20792	0	1.44439	0.0682388	0.0147749	0.00847726
2000-02-15	2000	2	11.5723		3238.01		2935.76	285.748	0.343522	0.243424	2.21036	0.048615	11.1658	2.48615	0.0102735	0	0	0		2.71715	0.637235	1.49653	1.48099	0.169682	1.31131	0	1.1337	0.0638362	0.0138217	0.00805417
2000-03-15	2000	3	11.8781		3238.32		2935.69	285.944	0.310547	0.35787	1.43919	0.048615	12.1188	2.37833	0.0254688	0	0	0		3.3506	0.392104	2.02675	2.13716	0.161182	1.97598	0	3.38651	0.0682388	0.0147749	0.00958272
2000-04-15	2000	4	11.9496		3238.39		2935.06	286.011	0.536397	0.790084	1.40824	0	12.2221	2.33194	0.0333969	0	0	0		1.53822	0.0249242	2.51247	2.87179	0.27469	2.5971	3.48846e-06	3.67618	0.0660375	0.0142983	0.0107175
2000-05-15	2000	5	10.7815		3237.22		2934.8	286.065	0.668389	0.858403	1.5974	0.0331311	10.5879	2.55985	0.0518847	0	0	0		1.88718	0.00319431	3.40761	3.88656	0.349631	3.53693	0.0199871	4.69299	0.0682388	0.0147749	0.0119973
2000-06-15	2000	6	10.3754		3236.81		2934.71	286.055	1.24625	0.681944	2.82474	0.0331311	8.80469	2.37724	0.0804656	0	0	0		4.06711	0.0209296	2.4165	2.88078	0.648206	2.23257	0.169662	0.633738	0.0660375	0.0142983	0.0116217
2000-07-15	2000	7	10.9676		3237.41		2934.97	284.919	1.4254	0.652493	5.30677	0.135352	7.02168	2.87016	0.106439	0	0	0		9.3824	1.39543	6.5287	4.46078	0.753154	3.70763	1.4148	2.74309	0.0682388	0.0147749	0.0117357
2000-08-15	2000	8	10.823		3237.26		2935.17	284.14	1.33985	0.698469	6.27396	0.10459	6.5567	2.92876	0.0468018	0	0	0		5.83588	1.91528	5.72939	3.3415	0.708188	2.63331	0.965307	3.59079	0.0682388	0.0147749	0.0116777
2000-09-15	2000	9	8.77715		3235.22		2935.27	284.16	0.94781	1.00809	4.57911	0.157594	6.52805	2.54598	0.020241	0	0	0		3.43461	1.44737	4.01856	3.0591	0.475332	2.58377	0.0778575	4.13843	0.0660375	0.0142983	0.010917
2000-10-15	2000	10	6.90638		3233.35		2935.4	284.24	0.681111	0.793301	3.01561	0.157609	6.84194	2.21189	0.0096387	0	0	0		0.94175	0.982839	1.99583	2.45624	0.34947	2.10677	0.000351842	3.47275	0.0682388	0.0147749	0.0106683
2000-11-15	2000	11	6.14867		3232.59		2935.41	284.373	0.559576	0.601542	2.319	0.0950775	7.32254	1.90333	0.00824035	0	0	0		1.32632	0.327044	0.516005	1.18221	0.285487	0.896728	0	0.582822	0.0660375	0.0142983	0.009216
2000-12-15	2000	12	6.43471		3232.87		2933.94	284.489	0.405106	0.936041	2.55905	0	8.16567	2.37232	0.00903966	0	0	0		1.94894	0.542313	1.02237	2.9527	0.213032	2.73967	0	5.69432	0.0682388	0.0147749	0.00881299
2001-01-15	2001	1	5.94631		3232.39		2933.93	284.652	0.273089	0.272051	2.04833	0.047381	9.01548	2.14296	0.00776585	0	0	0		1.27304	1.52124	1.0653	1.11829	0.139896	0.978391	0	1.74538	0.0682034	0.0145281	0.00848687
2001-02-15	2001	2	5.90619		3232.35		2933.79	284.775	0.198664	0.402187	1.1934	0.047381	9.73994	2.19211	0.00819468	0	0	0		1.66539	0.266306	1.42578	1.76681	0.0897184	1.67709	0	1.72347	0.0616031	0.0131222	0.00824656
2001-03-15	2001	3	6.38243		3232.82		2933.62	284.907	0.210894	0.409451	0.848557	0.047381	10.5344	2.23535	0.0134298	0	0	0		3.00677	0.0872969	2.11277	2.13948	0.105624	2.03385	0	3.39495	0.0682034	0.0145281	0.00994046
2001-04-15	2001	4	7.72645		3234.17		2933.2	285.017	0.477096	0.575026	1.35106	0	11.1313	2.3986	0.0206138	0	0	0		3.31854	0.0193172	2.9888	2.58511	0.246655	2.33845	1.25768e-05	2.9864	0.0660033	0.0140595	0.0105201
2001-05-15	2001	5	6.9478		3233.39		2932.85	285.063	0.555359	0.730501	1.3768	0.0328649	10.2153	2.53601	0.024436	0	0	0		1.78678	0.00603258	3.2407	3.19532	0.291057	2.90427	0.00736744	4.32254	0.0682034	0.0145281	0.0119973
2001-06-15	2001	6	6.58179		3233.02		2932.83	284.946	1.13823	0.493611	2.78877	0.0328655	8.06141	2.6404	0.0862389	0	0	0		5.33764	0.0382568	3.21077	3.1298	0.597121	2.53268	0.249638	0.455215	0.0660033	0.0140595	0.0116118
2001-07-15	2001	7	7.87623		3234.32		2933.29	283.576	1.54211	0.457431	5.47604	0.126213	6.54272	3.14121	0.163549	0	0	0		11.1319	2.28339	7.10696	4.4026	0.827098	3.5755	1.62743	1.91007	0.0682034	0.0145281	0.0119031
2001-08-15	2001	8	7.00809		3233.45		2933.64	282.543	1.29489	0.547993	6.06197	0.0957364	6.32881	2.88064	0.0547013	0	0	0		5.27442	2.78893	5.64783	2.93783	0.696266	2.24157	1.19821	3.68229	0.0682034	0.0145281	0.0118814
2001-09-15	2001	9	5.01594		3231.46		2933.65	282.611	0.864577	0.934728	4.48723	0.146844	6.35122	2.40053	0.0131437	0	0	0		2.62827	1.28907	3.58274	2.80794	0.437104	2.37084	0.0314466	3.80084	0.0660033	0.0140595	0.0110172
2001-10-15	2001	10	2.69428		3229.13		2933.75	282.691	0.540002	0.751094	2.63571	0.14686	6.51854	2.09493	0.00805031	0	0	0		0.65404	0.850254	1.59089	2.23614	0.275862	1.96028	0.000199494	3.28007	0.0682034	0.0145281	0.0108153
2001-11-15	2001	11	2.43993		3228.88		2933.79	282.802	0.45414	0.54974	2.1038	0.0910863	7.05235	2.02968	0.0102805	0	0	0		1.08297	0.221737	0.46531	1.13454	0.231108	0.903434	0	0.557639	0.0660033	0.0140595	0.0093753
2001-12-15	2001	12	2.19007		3228.63		2932.37	282.952	0.32721	0.86677	2.17944	0	7.61407	2.30761	0.00819581	0	0	0		1.45873	0.431233	0.958884	2.6562	0.171125	2.48507	0	5.44025	0.0682034	0.0145281	0.0090365
2002-01-15	2002	1	1.69216		3228.13		2932.36	283.01	0.226776	0.332205	1.56663	0.0447752	8.46067	2.12617	0.00918191	0	0	0		1.91624	1.21922	1.16907	1.37889	0.114076	1.26481	0	2.06009	0.0688153	0.0143818	0.00875657
2002-02-15	2002	2	3.07031		3229.51		2932.27	283.19	0.225922	0.322539	1.16622	0.0447752	9.96851	2.30346	0.019143	0	0	0		4.45683	0.269036	1.64124	1.94548	0.104935	1.84054	0	1.46186	0.0621558	0.01299	0.00820848
2002-03-15	2002	3	5.37263		3231.81		2932.23	283.39	0.400005	0.321016	1.40536	0.0447752	11.57	2.42254	0.0234319	0	0	0		3.98291	0.195077	2.5789	2.16334	0.212793	1.95055	0	3.12187	0.0688153	0.0143818	0.0101441
2002-04-15	2002	4	6.277	3.4316	3232.72		2931.69	283.657	0.594775	0.745965	1.44716	0	12.1899	2.36513	0.0261158	0	0	0		3.70154	0.0372369	2.73961	3.00907	0.307524	2.70155	1.58511e-05	3.63443	0.0665955	0.0139179	0.0108771
2002-05-15	2002	5	5.79013	4.449	3232.23		2931.25	283.748	0.576352	0.850405	1.35879	0.0292647	11.9767	2.41621	0.0189877	0	0	0		1.59378	0.00885376	2.98629	3.32869	0.302752	3.02594	0.00353705	4.32182	0.0688153	0.0143818	0.0122031
2002-06-15	2002	6	4.96576		3231.41		2931.28	283.775	1.10353	0.508978	2.31605	0.0292647	10.0367	2.26929	0.0903898	0	0	0		3.3208	0.056164	2.32781	2.82612	0.575882	2.25024	0.0806276	0.633672	0.0665955	0.0139179	0.0119547
2002-07-15	2002	7	4.28275		3230.72		2931.22	283.329	1.25808	0.898722	4.04573	0.126584	7.40255	2.33851	0.103956	0	0	0		3.46294	1.25801	4.95095	3.94153	0.657887	3.28364	0.593943	4.46585	0.0688153	0.0143818	0.012356
2002-08-15	2002	8	3.19559	0.5902	3229.64		2931.38	282.139	1.11929	0.865629	4.85512	0.0997179	6.42909	2.66205	0.0881383	0	0	0		7.52538	0.82588	5.62582	3.98715	0.589526	3.39763	1.42408	3.54051	0.0688153	0.0143818	0.0121126
2002-09-15	2002	9	3.73114	1.3844	3230.17		2931.65	282.249	1.01995	0.825324	5.16703	0.149103	6.37025	2.71359	0.0313521	0	0	0		4.12901	1.74225	3.99583	3.00113	0.516709	2.48442	0.0314442	3.39332	0.0665955	0.0139179	0.0110256
2002-10-15	2002	10	1.46544	-1.0224	3227.91		2931.73	282.288	0.664005	0.720759	3.51385	0.149119	6.57772	2.25743	0.0080486	0	0	0		1.00123	0.774304	2.091	2.25518	0.341297	1.91388	0.00128984	3.22146	0.0688153	0.0143818	0.0108705
2002-11-15	2002	11	0.792603	-3.0157	3227.23		2931.79	282.338	0.559607	0.525056	3.0635	0.0892229	6.87197	1.98858	0.00773659	0	0	0		1.02986	0.334048	0.740926	1.13694	0.287354	0.849584	0	0.548986	0.0665955	0.0139179	0.0095379
2002-12-15	2002	12	0.631125	-2.1197	3227.07		2930.19	282.501	0.409406	0.925065	3.19884	0	7.3764	2.46284	0.00876211	0	0	0		1.97961	0.887009	1.13133	2.9718	0.215845	2.75596	0	5.78947	0.0688153	0.0143818	0.00905386
2003-01-15	2003	1	-0.199853	-1.7035	3226.24		2930.23	282.621	0.297293	0.270507	2.59059	0.0483614	7.98558	2.18908	0.00817266	0	0	0		1.77874	1.24635	1.26253	1.2442	0.153939	1.09026	0	1.55122	0.0693671	0.0142337	0.00875936
2003-02-15	2003	2	2.81838	-0.6569	3229.26		2930.4	283.006	0.477318	0.230546	2.54478	0.0483614	9.74938	2.65912	0.14025	0	0	0		7.96322	0.367738	1.91062	2.54583	0.232195	2.31364	0	1.03883	0.0626542	0.0128562	0.00837508
2003-03-15	2003	3	6.84085	4.8434	3233.28		2930.63	283.297	0.771655	0.245072	3.15777	0.0483614	12.3382	2.71278	0.0766951	0	0	0		5.53072	1.34932	2.60919	2.54694	0.421909	2.12503	0	2.5003	0.0693671	0.0142337	0.0100056
2003-04-15	2003	4	7.80004	5.7145	3234.24		2930.27	283.603	0.934183	0.68793	3.0111	0	13.1405	2.52368	0.0653527	0	0	0		4.25719	0.306584	2.87052	3.44767	0.4925	2.95517	1.08938e-05	3.66229	0.0671295	0.0137745	0.0108876
2003-05-15	2003	5	8.04836	6.8087	3234.49		2930.02	283.807	0.879904	0.743705	2.75447	0.0319396	13.7942	2.42806	0.0312389	0	0	0		3.06175	0.875447	2.74563	3.36271	0.472183	2.89053	0.000204048	3.96104	0.0693671	0.0142337	0.0118169
2003-06-15	2003	6	6.82		3233.26		2929.9	283.819	1.26521	0.602243	3.29456	0.0319396	11.976	2.27582	0.0916073	0	0	0		2.34384	0.270296	2.11104	2.85976	0.66276	2.197	0.0415955	0.640672	0.0671295	0.0137745	0.0121923
2003-07-15	2003	7	7.0802	3.5568	3233.52		2930.27	283.03	1.73981	0.635922	6.35453	0.137968	8.01463	3.06114	0.279372	0	0	0		9.63474	2.33903	7.29429	5.43015	0.922557	4.50759	0.919204	2.72554	0.0693671	0.0142337	0.0121979
2003-08-15	2003	8	5.75208	2.9544	3232.19		2930.66	282.101	1.65478	0.562368	7.48746	0.108477	6.48007	3.04565	0.0953369	0	0	0		7.35637	3.07334	6.42673	3.7438	0.886646	2.85715	1.12413	2.98147	0.0693671	0.0142337	0.0120925
2003-09-15	2003	9	3.99269	2.3325	3230.43		2930.81	282.134	1.21144	0.816885	6.06786	0.161928	6.39442	2.79698	0.0342522	0	0	0		4.46558	2.14305	4.3589	3.2089	0.617581	2.59132	0.126136	3.99622	0.0671295	0.0137745	0.0113532
2003-10-15	2003	10	2.15692	0.69	3228.6		2930.88	282.182	0.82371	0.698199	4.74624	0.161943	6.64009	2.45687	0.00880577	0	0	0		0.717936	1.09029	1.92159	2.32429	0.4287	1.89559	6.18499e-05	3.43096	0.0693671	0.0142337	0.0108962
2003-11-15	2003	11	1.66825	-2.0386	3228.11		2930.91	282.301	0.669928	0.544165	4.29808	0.0964	7.10356	2.17849	0.00884082	0	0	0		1.50356	0.3266	0.625685	1.30085	0.34517	0.955681	0	0.538274	0.0671295	0.0137745	0.0093534
2003-12-15	2003	12	1.61953	-1.2344	3228.06		2929.64	282.451	0.475551	0.825807	4.42323	0	7.76254	2.47211	0.00920938	0	0	0		1.88332	0.703491	0.974852	2.77745	0.252852	2.5246	0	5.27445	0.0693671	0.0142337	0.00905696
2004-01-15	2004	1	2.21176	-1.0499	3228.65		2929.69	282.553	0.423866	0.23964	4.13707	0.049264	9.16304	2.37116	0.0259079	0	0	0		5.02123	1.04474	1.6372	1.79146	0.225155	1.5663	0	1.36151	0.0698883	0.0140808	0.00892831
2004-02-15	2004	2	4.35258	2.1768	3230.79		2929.8	282.704	0.477906	0.30846	3.99303	0.049264	10.8875	2.55971	0.0152475	0	0	0		2.71965	0.872023	1.91229	1.84294	0.24002	1.60292	0	1.92038	0.0653793	0.0131724	0.00894708
2004-03-15	2004	3	3.56342	0.189	3230		2929.62	282.853	0.44069	0.505947	3.15374	0.049264	11.0166	2.34545	0.0192346	0	0	0		1.26186	0.264612	2.34803	2.56129	0.231376	2.32991	0	4.29633	0.0698883	0.0140808	0.0108156
2004-04-15	2004	4	3.20173	-0.4513	3229.64		2929.13	283.106	0.490634	0.833278	2.61157	0	11.0826	2.35996	0.0314641	0	0	0		4.14063	0.0511926	2.80691	3.12598	0.251033	2.87494	0.000101777	3.69367	0.0676338	0.0136266	0.0112503
2004-05-15	2004	5	3.55596	-0.3743	3230		2929	283.201	0.591653	0.747486	2.78503	0.0321662	11.1661	2.4458	0.0231224	0	0	0		1.67498	0.274126	3.07701	3.18605	0.312234	2.87382	0.00267251	4.18593	0.0698883	0.0140808	0.0122766
2004-06-15	2004	6	2.72848	-2.1787	3229.17		2928.97	283.235	1.03867	0.541523	3.19849	0.0321662	9.81731	2.28176	0.0523381	0	0	0		3.08961	0.237041	2.31894	2.39309	0.543718	1.84937	0.0518446	0.587521	0.0676338	0.0136266	0.0121032
2004-07-15	2004	7	1.80952	-2.5562	3228.25		2928.68	282.84	1.1772	0.888224	4.47051	0.140446	7.44645	2.50635	0.101534	0	0	0		5.07201	1.22514	5.45349	4.07583	0.614911	3.46092	0.543898	4.17288	0.0698883	0.0140808	0.0125122
2004-08-15	2004	8	1.31884	-2.7068	3227.76		2928.95	282.209	1.08628	0.654194	5.35774	0.111096	6.61493	2.71241	0.0583337	0	0	0		6.73009	1.23266	5.88077	3.35551	0.574268	2.78124	0.798215	3.21743	0.0698883	0.0140808	0.0122214
2004-09-15	2004	9	-0.251829	-3.8744	3226.19		2928.89	282.164	0.766858	1.12914	4.2864	0.164778	6.5183	2.2589	0.0119031	0	0	0		2.43437	1.01866	3.81883	2.98855	0.380362	2.60818	0.119989	4.70209	0.0676338	0.0136266	0.0115779
2004-10-15	2004	10	-0.441823	-5.3551	3226		2929.05	282.337	0.607241	0.745607	3.67432	0.164793	6.99726	2.39417	0.0225836	0	0	0		3.41414	0.881192	2.28036	2.65523	0.311267	2.34397	2.56127e-06	2.86027	0.0698883	0.0140808	0.0107598
2004-11-15	2004	11	-0.964799	-4.5717	3225.47		2929.11	282.417	0.587597	0.545266	3.22344	0.0987793	7.46629	2.02222	0.00791778	0	0	0		1.00563	0.50653	0.598379	1.17324	0.304076	0.869168	0	0.628086	0.0676338	0.0136266	0.0097254
2004-12-15	2004	12	-0.998948	-5.8676	3225.44		2927.51	282.633	0.415285	0.888519	3.32772	0	8.14929	2.50107	0.0107445	0	0	0		2.84631	0.959161	1.11438	3.0344	0.220422	2.81398	0	5.55607	0.0698883	0.0140808	0.00922715
2005-01-15	2005	1	0.683163	-2.0516	3227.12		2927.66	282.84	0.450721	0.171795	3.30095	0.0534625	10.0851	2.53931	0.0211853	0	0	0		4.49668	1.20042	1.55036	1.41819	0.242309	1.17588	0	1.03357	0.0788823	0.0155202	0.00876215
2005-02-15	2005	2	6.01263	4.6472	3232.45		2928.06	283.2	0.76579	0.110595	3.88416	0.0534625	13.286	2.99471	0.0945903	0	0	0		8.33161	1.49017	2.01977	2.40914	0.381312	2.02783	0	0.424478	0.0712485	0.0140182	0.00822696
2005-03-15	2005	3	8.45674	9.3581	3234.9		2928.43	283.433	1.07417	0.163717	4.2548	0.0534625	14.3798	2.99795	0.112262	0	0	0		6.85893	1.64669	3.18283	3.23089	0.589138	2.64176	6.32412e-08	1.5593	0.0788823	0.0155202	0.0102526
2005-04-15	2005	4	8.47831	8.7065	3234.92		2928.16	283.693	1.0854	0.625596	3.72758	0	15.0499	2.54339	0.0355875	0	0	0		3.50553	1.30144	2.71026	3.00316	0.572899	2.43026	1.13222e-06	3.28769	0.0763377	0.0150195	0.0108306
2005-05-15	2005	5	8.2104	9.7756	3234.65		2928.05	283.869	0.997014	0.62101	3.5574	0.0355187	14.9638	2.52181	0.0311046	0	0	0		3.82541	1.01829	3.1331	3.39915	0.537204	2.86195	0.00107753	3.66257	0.0788823	0.0155202	0.0118184
2005-06-15	2005	6	6.97977	7.3849	3233.42		2927.93	283.877	1.29817	0.570767	3.6852	0.0355187	13.5067	2.39967	0.111796	0	0	0		2.16397	0.964768	2.07043	2.92488	0.68037	2.24451	0.040309	0.71751	0.0763377	0.0150195	0.0124251
2005-07-15	2005	7	7.12625	7.5915	3233.57		2928.28	283.355	2.00149	0.54114	6.94194	0.146911	8.81016	3.15055	0.341382	0	0	0		8.56878	2.0401	6.89285	5.68502	1.0622	4.62282	0.722475	2.98043	0.0788823	0.0155202	0.0124604
2005-08-15	2005	8	4.11834	4.9146	3230.56		2928.12	282.58	1.63431	0.813432	7.62058	0.11421	6.81934	2.78808	0.0725284	0	0	0		4.93447	2.84502	5.76689	3.71427	0.865137	2.84914	0.912963	4.1841	0.0788823	0.0155202	0.0124787
2005-09-15	2005	9	1.86228	3.234	3228.3		2928.11	282.497	1.14147	0.978394	6.2008	0.171439	6.6408	2.5374	0.0236308	0	0	0		4.09497	1.83443	4.2014	3.33886	0.575487	2.76337	0.189206	3.78348	0.0763377	0.0150195	0.0116766
2005-10-15	2005	10	0.0904965	0.1119	3226.53		2928.16	282.585	0.756179	0.826097	4.93697	0.171455	6.80452	2.28102	0.0092976	0	0	0		1.04821	0.631485	2.02205	2.55722	0.387411	2.16981	5.23637e-05	3.59244	0.0788823	0.0155202	0.0111972
2005-11-15	2005	11	-0.548943	-1.5239	3225.89		2928.24	282.663	0.575685	0.592273	4.58073	0.105656	7.12867	1.99328	0.00867255	0	0	0		0.86451	0.332346	0.4884	1.20577	0.292206	0.913565	0	0.660969	0.0763377	0.0150195	0.0096705
2005-12-15	2005	12	-1.21281	-2.5221	3225.23		2926.66	282.72	0.388647	0.917158	4.71536	0	7.48552	2.33061	0.00873642	0	0	0		0.691622	0.967106	0.775145	2.83373	0.203577	2.63015	0	5.65422	0.0788823	0.0155202	0.00901077
2006-01-15	2006	1	0.0704169	-0.4505	3226.51		2926.75	282.882	0.362386	0.229294	4.49465	0.0525666	9.3418	2.37174	0.0244515	0	0	0		4.99318	0.854784	1.43815	1.51817	0.189515	1.32865	0	1.65596	0.0793845	0.015362	0.00895993
2006-02-15	2006	2	1.65723	1.2391	3228.1		2926.67	283.173	0.386641	0.442498	4.19064	0.0525666	10.7895	2.37494	0.0204858	0	0	0		3.09643	0.473927	2.01378	2.31136	0.181145	2.13022	0	2.00225	0.0717021	0.0138754	0.0091714
2006-03-15	2006	3	3.13255	2.7794	3229.57		2926.73	283.331	0.443089	0.293952	4.1724	0.0525666	12.1015	2.43936	0.0135699	0	0	0		4.35812	0.378658	2.64908	2.13234	0.233995	1.89835	0	2.58529	0.0793845	0.015362	0.0103754
2006-04-15	2006	4	3.7374	3.5512	3230.18		2926.37	283.525	0.552475	0.712673	3.57531	0	13.0264	2.39205	0.0239616	0	0	0		2.81769	0.318782	2.68901	2.6825	0.285049	2.39745	1.53003e-06	3.78676	0.0768237	0.0148665	0.0112548
2006-05-15	2006	5	2.44374	1.2584	3228.88		2926.18	283.56	0.667874	0.814662	3.38497	0.03528	11.6578	2.52503	0.0621116	0	0	0		1.80555	0.100947	3.50493	3.89179	0.35061	3.54118	0.0183023	4.59427	0.0793845	0.015362	0.0128408
2006-06-15	2006	6	1.27743	-0.3657	3227.72		2926.13	283.606	1.13357	0.625411	4.29525	0.03528	9.48771	2.34364	0.0559287	0	0	0		3.22368	0.236423	2.30592	2.56788	0.590051	1.97783	0.105128	0.648772	0.0768237	0.0148665	0.0123282
2006-07-15	2006	7	2.15247	-0.6725	3228.59		2926.49	282.565	1.48099	0.806678	6.84606	0.145743	7.20207	2.85802	0.197378	0	0	0		9.0859	1.59138	6.46419	5.11873	0.7833	4.33543	1.23726	3.44682	0.0793845	0.015362	0.0128343
2006-08-15	2006	8	3.37155	1.497	3229.81		2927.04	281.304	1.69905	0.577587	9.04446	0.113307	6.48272	3.41602	0.136577	0	0	0		10.8045	3.63852	7.55237	4.58897	0.912887	3.67609	1.55762	3.02618	0.0793845	0.015362	0.0124552
2006-09-15	2006	9	1.73614	1.604	3228.18		2927.31	281.336	1.39914	0.849575	7.638	0.169709	6.44734	2.95585	0.075248	0	0	0		4.11369	2.98828	4.25469	3.4173	0.716199	2.7011	0.0975348	4.05779	0.0768237	0.0148665	0.0117504
2006-10-15	2006	10	-1.12487	-2.9365	3225.31		2927.36	281.396	0.854069	0.775607	5.73103	0.169724	6.59962	2.42083	0.00959979	0	0	0		1.67354	0.837457	2.38278	2.57148	0.444181	2.1273	0.000785613	3.23628	0.0793845	0.015362	0.0114858
2006-11-15	2006	11	-0.795973	-3.302	3225.64		2927.48	281.547	0.761027	0.550744	5.68202	0.103314	7.20759	2.29401	0.0135552	0	0	0		2.64139	0.413827	0.999885	1.61425	0.39341	1.22084	0	0.621686	0.0768237	0.0148665	0.0098667
2006-12-15	2006	12	1.26462	1.6885	3227.7		2926.72	281.775	0.721759	0.646828	6.15854	0	8.95323	2.69296	0.0316786	0	0	0		4.82591	1.16612	1.492	3.01733	0.391313	2.62602	0	4.45695	0.0793845	0.015362	0.0091791
2007-01-15	2007	1	0.633152	1.3197	3227.07		2926.68	282.128	0.474957	0.332337	5.35877	0.0520094	9.76705	2.27344	0.00905559	0	0	0		0.901326	0.982573	1.2192	1.46791	0.250972	1.21693	0	2.29074	0.0798526	0.0151857	0.00908858
2007-02-15	2007	2	3.47818	2.1706	3229.92		2926.91	282.33	0.706441	0.219785	5.84698	0.0520094	10.895	2.84418	0.109503	0	0	0		8.10778	0.979865	2.14139	3.00974	0.350288	2.65945	0	0.628838	0.0721249	0.0137161	0.00868588
2007-03-15	2007	3	7.2478	8.0254	3233.69		2927.27	282.669	1.02669	0.143721	6.16872	0.0520094	13.2811	2.94341	0.128522	0	0	0		8.65605	2.01659	3.00449	3.12474	0.570174	2.55456	0	1.80878	0.0798526	0.0151857	0.0103149
2007-04-15	2007	4	7.44752	7.8615	3233.89		2927.06	282.733	1.2401	0.772039	6.20943	0	13.2273	2.5494	0.0922511	0	0	0		1.71344	1.55617	2.99642	3.68334	0.656629	3.02671	0.000350285	3.98104	0.0772767	0.0146958	0.0117024
2007-05-15	2007	5	4.66286	4.4949	3231.1		2926.83	282.855	1.0879	0.828838	5.43608	0.0353471	11.3442	2.62348	0.0590339	0	0	0		2.32867	1.12332	3.28163	4.08578	0.583518	3.50226	0.0144734	4.31625	0.0798526	0.0151857	0.0126588
2007-06-15	2007	6	3.6168	3.5538	3230.06		2926.9	282.734	1.58035	0.517481	6.53899	0.0353471	8.99988	2.59237	0.161016	0	0	0		6.76751	0.884435	3.47241	3.95755	0.82755	3.13	0.269978	0.565516	0.0772767	0.0146958	0.0125619
2007-07-15	2007	7	4.21511	4.5082	3230.65		2927.33	281.805	1.86229	0.55526	9.0603	0.142755	6.73013	3.03617	0.135721	0	0	0		7.75955	3.65137	6.9464	4.45447	0.993633	3.46083	1.11324	3.03521	0.0798526	0.0151857	0.0128188
2007-08-15	2007	8	1.57461	2.6374	3228.01		2927.52	280.488	1.38634	0.680919	8.46829	0.110202	6.35814	2.94043	0.062463	0	0	0		6.869	2.8375	6.08376	3.50179	0.739116	2.76267	1.48863	3.56496	0.0798526	0.0151857	0.0127705
2007-09-15	2007	9	-0.167841	0.773	3226.27		2927.65	280.505	0.975519	0.973772	7.0818	0.165728	6.31046	2.5958	0.0126532	0	0	0		3.41297	1.86036	4.19532	3.00752	0.491842	2.51567	0.113475	3.94167	0.0772767	0.0146958	0.0118947
2007-10-15	2007	10	-2.44284	-2.7297	3224		2927.76	280.561	0.616893	0.782998	5.32529	0.165744	6.50456	2.27058	0.00900291	0	0	0		0.474536	1.00624	1.61511	2.34872	0.314792	2.03393	7.88617e-05	3.49175	0.0798526	0.0151857	0.0112961
2007-11-15	2007	11	-3.40317	-4.6604	3223.04		2927.76	280.58	0.466899	0.598525	4.84604	0.101487	6.65634	2.02127	0.00863271	0	0	0		0.464743	0.279104	0.40824	1.13046	0.236647	0.893815	1.53003e-06	0.626184	0.0772767	0.0146958	0.0100677
2007-12-15	2007	12	-3.35595	-5.9879	3223.08		2926.37	280.723	0.347573	0.85925	5.10365	0	7.25585	2.41131	0.00903207	0	0	0		1.62312	0.968706	1.05268	2.70719	0.182493	2.5247	0	5.37147	0.0798526	0.0151857	0.00923459
2008-01-15	2008	1	-1.43084	-3.098	3225.01		2926.48	280.749	0.47954	0.192381	5.20939	0.0574366	9.35114	2.44057	0.0469892	0	0	0		6.17784	0.970051	1.50453	1.80095	0.256693	1.54426	0	1.17772	0.0803005	0.0150226	0.00886693
2008-02-15	2008	2	0.0643349	-0.6573	3226.5		2926.5	280.913	0.388678	0.312079	4.58108	0.0574366	11.3276	2.40698	0.0128719	0	0	0		2.634	1.02254	1.62385	1.62621	0.192386	1.43382	0	1.56878	0.0751199	0.0140534	0.00891344
2008-03-15	2008	3	-0.710833	0.0296	3225.73		2926.29	280.99	0.355891	0.505804	3.74976	0.0574366	11.5048	2.26212	0.015917	0	0	0		1.50217	0.228334	2.34719	2.481	0.183106	2.29789	0	4.21395	0.0803005	0.0150226	0.0111088
2008-04-15	2008	4	0.988987	0.5702	3227.43		2926.05	281.185	0.716458	0.517578	4.38113	0	12.0416	2.47574	0.0625499	0	0	0		5.76672	0.381677	3.13409	3.11628	0.379482	2.7368	2.23996e-05	2.3976	0.0777102	0.014538	0.0112533
2008-05-15	2008	5	-0.143734	-0.743	3226.3		2925.86	281.249	0.698651	0.734418	3.80434	0.037208	11.4228	2.45642	0.0364931	0	0	0		2.71216	0.580162	3.38471	3.50516	0.372217	3.13295	0.00661164	3.92699	0.0803005	0.0150226	0.0127264
2008-06-15	2008	6	-0.35628	-2.275	3226.08		2926.08	280.944	1.51294	0.435034	6.02544	0.037208	8.13262	2.70939	0.207536	0	0	0		6.38371	0.55963	3.73852	4.1969	0.792571	3.40432	0.402391	0.461692	0.0777102	0.014538	0.0126888
2008-07-15	2008	7	0.0474553	-1.3667	3226.49		2926.47	279.499	1.6402	0.66204	8.66578	0.163394	6.38954	2.89217	0.106088	0	0	0		7.92645	2.83262	6.70803	4.16334	0.872774	3.29057	1.60899	3.52307	0.0803005	0.0150226	0.0130265
2008-08-15	2008	8	-0.113816	0.1426	3226.33		2926.99	278.493	1.48658	0.520605	9.22161	0.129006	6.194	3.16743	0.122154	0	0	0		9.20575	3.78637	6.61401	3.94995	0.802676	3.14727	1.23008	2.90517	0.0803005	0.0150226	0.0126672
2008-09-15	2008	9	-2.40927	-2.4893	3224.03		2927.19	278.609	1.05871	0.971728	7.01845	0.190644	6.33988	2.62246	0.0337774	0	0	0		3.99573	1.42917	4.10762	3.30173	0.537881	2.76385	0.0304312	4.49302	0.0777102	0.014538	0.0118857
2008-10-15	2008	10	-4.36129	-4.4214	3222.08		2927.29	278.69	0.690003	0.856676	5.3907	0.190659	6.66023	2.29895	0.00994109	0	0	0		1.28181	0.840127	2.23009	2.60128	0.354331	2.24695	0.000142293	3.90693	0.0803005	0.0150226	0.0117434
2008-11-15	2008	11	-4.75797	-6.089	3221.68		2927.26	278.76	0.56519	0.687579	5.06939	0.11545	7.15137	2.06019	0.0101668	0	0	0		1.13817	0.282527	0.600364	1.35355	0.289508	1.06404	0	0.738369	0.0777102	0.014538	0.010059
2008-12-15	2008	12	-3.56081	-5.2785	3222.88		2925.93	278.997	0.500607	0.91054	5.62233	0	8.17491	2.7153	0.0236638	0	0	0		4.4006	1.09135	1.62211	3.40273	0.267312	3.13542	0	5.29828	0.0803005	0.0150226	0.00962612
2009-01-15	2009	1	-1.94822	-3.5064	3224.49		2926	279.31	0.518516	0.157863	5.48589	0.0556284	10.3728	2.56861	0.023001	0	0	0		6.02821	1.50898	1.89611	1.58911	0.27732	1.31179	0	0.998955	0.0807169	0.0148691	0.00943299
2009-02-15	2009	2	1.25344	-0.7657	3227.69		2926.1	279.611	0.589024	0.331985	5.25342	0.0556284	13.189	2.53063	0.0280187	0	0	0		5.24471	1.04845	2.0173	2.16925	0.285347	1.88391	0	1.53221	0.0729056	0.0134302	0.00903028
2009-03-15	2009	3	2.46954	1.4029	3228.91		2926.08	279.807	0.597168	0.343486	4.86566	0.0556284	14.7244	2.41115	0.0255028	0	0	0		4.80422	0.856044	2.75394	2.62178	0.320938	2.30084	0	2.71656	0.0807169	0.0148691	0.010819
2009-04-15	2009	4	5.13406	3.7639	3231.57		2926.01	280.079	0.992467	0.516819	5.41825	0	15.9556	2.5222	0.0786323	0	0	0		5.61524	0.9262	2.98489	3.34043	0.52779	2.81264	1.51167e-05	3.03058	0.0781131	0.0143895	0.0113601
2009-05-15	2009	5	4.06708	3.5501	3230.51		2925.79	280.18	0.972606	0.744851	4.81581	0.0358463	15.4806	2.42879	0.0551172	0	0	0		2.28762	0.918073	3.09205	3.69526	0.523224	3.17204	0.00130599	4.48855	0.0807169	0.0148691	0.0129146
2009-06-15	2009	6	2.27686	-0.8679	3228.72		2925.59	280.28	1.29586	0.679134	4.98191	0.0358463	13.5335	2.25244	0.06884	0	0	0		2.27871	0.588621	1.93505	2.70794	0.677937	2.03001	0.0234694	0.789869	0.0781131	0.0143895	0.0127506
2009-07-15	2009	7	1.05557	0.4664	3227.5		2925.55	280.005	1.55679	0.897769	6.39286	0.158436	10.0946	2.59153	0.248695	0	0	0		6.50735	1.60536	6.16428	5.39816	0.816856	4.5813	0.404957	4.07296	0.0807169	0.0148691	0.0132528
2009-08-15	2009	8	-0.334593	-3.1681	3226.1		2925.78	279.177	1.67577	0.862573	8.64766	0.125408	6.87743	2.77752	0.185622	0	0	0		6.14618	1.57829	5.78307	4.71667	0.886159	3.83052	0.94965	3.85908	0.0807169	0.0148691	0.0131208
2009-09-15	2009	9	-1.6369	-4.7587	3224.8		2926.06	279.257	1.38341	0.927524	7.63783	0.185146	6.6458	2.63783	0.0712291	0	0	0		3.65914	2.48789	4.04359	3.54253	0.700062	2.84247	0.0493509	4.67552	0.0781131	0.0143895	0.0122337
2009-10-15	2009	10	-4.36013	-7.7543	3222.08		2926.1	279.328	0.861059	0.893941	5.6833	0.185161	6.77409	2.24284	0.0106334	0	0	0		1.00025	0.874933	1.93584	2.77325	0.441841	2.33141	0.000294862	3.74066	0.0807169	0.0148691	0.0116092
2009-11-15	2009	11	-4.64929	-7.4291	3221.79		2926.1	279.483	0.650117	0.673941	5.337	0.112204	7.33588	2.08782	0.00968333	0	0	0		1.64553	0.387528	0.636376	1.37989	0.330874	1.04902	0	0.662208	0.0781131	0.0143895	0.0099657
2009-12-15	2009	12	-4.4054	-6.121	3222.03		2924.68	279.624	0.456425	0.95172	5.49897	0	8.32416	2.49451	0.00908838	0	0	0		1.62539	0.948178	1.06753	2.98638	0.240306	2.74607	0	5.66723	0.0807169	0.0148691	0.00956815
2010-01-15	2010	1	-5.25012	-6.0386	3221.19		2924.64	279.908	0.297622	0.297126	4.81395	0.0497385	9.00704	2.1648	0.0104161	0	0	0		2.13709	1.01123	1.30802	1.34114	0.151989	1.18915	0	1.94337	0.0909828	0.0163916	0.009424
2010-02-15	2010	2	-1.41286	-3.3457	3225.03		2924.65	280.293	0.468593	0.31405	4.97121	0.0497385	11.7321	2.4667	0.0787769	0	0	0		7.22424	0.541715	1.87576	2.5173	0.226672	2.29063	0	1.36702	0.082178	0.0148053	0.0090566
2010-03-15	2010	3	0.199982	-2.5026	3226.64		2924.58	280.465	0.618352	0.400664	4.89758	0.0497385	13.1677	2.41578	0.0431387	0	0	0		3.22364	1.09581	2.78628	2.75495	0.331734	2.42321	1.89724e-07	3.7809	0.0909828	0.0163916	0.0114657
2010-04-15	2010	4	-0.497212	-3.2385	3225.94		2923.98	280.711	0.674399	0.880983	4.18013	0	13.1399	2.34461	0.0318586	0	0	0		3.29465	0.0821589	2.94424	3.29158	0.347254	2.94432	0.000168823	3.92735	0.0880479	0.0158628	0.0121569
2010-05-15	2010	5	0.274553	-1.7228	3226.71		2923.86	280.991	0.825258	0.796161	4.47973	0.0342409	13.1744	2.49779	0.051921	0	0	0		4.51389	0.396208	3.54345	3.96486	0.436462	3.52839	0.00814208	4.4529	0.0909828	0.0163916	0.0131632
2010-06-15	2010	6	0.323598	-0.1881	3226.76		2923.74	281.097	1.22858	0.615842	4.92792	0.0342409	12.8938	2.18059	0.0432164	0	0	0		3.79008	0.566789	2.45552	2.50928	0.642154	1.86713	0.0230068	0.707523	0.0880479	0.0158628	0.0128877
2010-07-15	2010	7	1.6654	-0.4159	3228.1		2923.95	280.995	1.69192	0.729245	6.70118	0.135612	10.5474	2.97357	0.384231	0	0	0		14.1817	1.88188	6.76083	6.4958	0.906196	5.5896	0.361402	2.60666	0.0909828	0.0163916	0.0132686
2010-08-15	2010	8	7.56515	4.5448	3234		2925.13	279.953	3.39694	0.237383	12.9321	0.103786	7.44985	4.09711	0.707354	0	0	0		15.214	8.83253	7.92835	8.73577	1.86314	6.87263	1.28931	1.80752	0.0909828	0.0163916	0.0129174
2010-09-15	2010	9	1.70468	1.5964	3228.14		2925.42	280.051	2.5398	0.579313	9.32869	0.157439	6.90334	3.07189	0.0908038	0	0	0		5.33994	4.88724	4.68095	3.92666	1.3318	2.59486	0.0867688	3.21487	0.0880479	0.0158628	0.0121974
2010-10-15	2010	10	-2.29911	-1.1369	3224.14		2925.48	280.099	1.56672	0.657418	6.4996	0.157454	7.15171	2.51728	0.0131202	0	0	0		1.11682	1.88619	2.10419	2.72363	0.840739	1.88289	0.000358072	3.4162	0.0909828	0.0163916	0.0119908
2010-11-15	2010	11	-3.49455	-3.4983	3222.95		2925.46	280.126	1.05086	0.532653	5.96315	0.0962813	7.47735	2.2279	0.00963989	0	0	0		0.350265	0.533196	0.46927	1.36974	0.547256	0.822484	1.89724e-06	0.641644	0.0880479	0.0158628	0.0102654
2010-12-15	2010	12	-4.65401	-4.7527	3221.79		2924.17	280.184	0.646954	0.844425	5.83217	0	7.69093	2.40481	0.0103694	0	0	0		1.12123	0.682736	0.735452	2.8662	0.34544	2.52076	0	5.36618	0.0909828	0.0163916	0.00947484
2011-01-15	2011	1	-4.6588		3221.78		2924.11	280.31	0.406023	0.262221	5.40541	0.0531733	8.86886	2.35098	0.0105543	0	0	0		1.94362	1.00475	1.19025	1.28521	0.212469	1.07274	0	1.92814	0.0919491	0.0163054	0.00926001
2011-02-15	2011	2	-0.235235	1.4421	3226.2		2924.14	280.723	0.613264	0.257551	5.82989	0.0531733	11.731	2.78209	0.0693374	0	0	0		9.01801	0.804898	2.05802	2.71853	0.298551	2.41998	0	0.857341	0.0830508	0.0147274	0.00890176
2011-03-15	2011	3	2.06383	2.6703	3228.5		2924.18	280.94	0.748909	0.292631	5.54669	0.0531733	14.0301	2.67023	0.0419833	0	0	0		4.27991	1.63192	2.6478	2.42678	0.40488	2.0219	0	3.24701	0.0919491	0.0163054	0.01108
2011-04-15	2011	4	2.36329	4.3488	3228.8		2923.72	281.114	0.865197	0.579056	5.19883	0	14.6908	2.58964	0.0434052	0	0	0		4.91494	0.400864	3.11326	3.22797	0.454783	2.77318	1.19342e-06	2.65035	0.088983	0.0157794	0.0115524
2011-05-15	2011	5	0.886101	1.4176	3227.33		2923.56	281.169	0.879375	0.799184	4.56157	0.0360101	13.7018	2.57352	0.0448039	0	0	0		1.9582	0.719138	3.46385	3.76314	0.467876	3.29526	0.00513499	4.80638	0.0919491	0.0163054	0.0134639
2011-06-15	2011	6	-0.239463		3226.2		2923.48	281.161	1.3133	0.641481	5.39566	0.0360101	11.5229	2.5485	0.097107	0	0	0		4.04477	0.218985	2.50516	3.22373	0.687255	2.53648	0.0714767	0.504049	0.088983	0.0157794	0.0132804
2011-07-15	2011	7	-0.0722876	-1.1187	3226.37		2923.83	280.611	1.66376	0.660407	7.81466	0.145417	8.46028	2.98184	0.195188	0	0	0		8.18422	2.18292	6.35828	4.9281	0.882151	4.04595	0.717513	2.95095	0.0919491	0.0163054	0.0134044
2011-08-15	2011	8	0.0847364	-1.2534	3226.52		2924.27	279.557	1.79751	0.577094	9.72952	0.112369	6.986	3.22158	0.275255	0	0	0		10.6112	2.76334	6.7803	4.96452	0.963241	4.00128	1.2544	2.5158	0.0919491	0.0163054	0.0132168
2011-09-15	2011	9	0.293298	0.4883	3226.73		2924.81	279.53	1.87567	0.43356	9.59506	0.169216	6.69757	3.47279	0.144286	0	0	0		7.74669	4.87075	5.68069	4.03533	0.97063	3.0647	0.173509	2.80649	0.088983	0.0157794	0.012324
2011-10-15	2011	10	-4.00801	-2.5825	3222.43		2924.78	279.632	1.15667	0.671589	6.44919	0.169231	6.90936	2.64762	0.0127076	0	0	0		2.03973	2.05545	2.65848	2.67877	0.608709	2.07006	0.000146814	3.57269	0.0919491	0.0163054	0.01193
2011-11-15	2011	11	-4.53539	-3.2104	3221.9		2924.75	279.748	0.91636	0.523143	6.01226	0.103951	7.55814	2.2814	0.0103761	0	0	0		1.39556	0.588389	0.820794	1.46338	0.475981	0.987402	0	0.708758	0.088983	0.0157794	0.0106599
2011-12-15	2011	12	-5.43301	-3.4488	3221.01		2923.53	279.836	0.574619	0.839485	5.77401	0	7.99183	2.45244	0.0100613	0	0	0		0.89335	0.675645	0.824844	2.80481	0.305482	2.49932	0	5.47196	0.0919491	0.0163054	0.00968874
2012-01-15	2012	1	-5.02292	-3.4873	3221.42		2923.51	279.937	0.430563	0.240333	5.44563	0.0533961	9.35948	2.42249	0.0154188	0	0	0		3.75908	1.08632	1.31378	1.4481	0.226624	1.22148	0	1.74266	0.0928276	0.0162158	0.00929721
2012-02-15	2012	2	-2.86253	-2.5167	3223.58		2923.51	280.207	0.397474	0.29668	4.87705	0.0533961	11.6718	2.54642	0.0211069	0	0	0		4.37726	0.779472	1.5732	1.95486	0.196801	1.75805	0	1.34324	0.0868388	0.0151696	0.00906105
2012-03-15	2012	3	-1.5598	0.7019	3224.88		2923.45	280.527	0.439923	0.384317	4.19925	0.0533961	13.3218	2.46949	0.036815	0	0	0		4.05437	0.482879	2.25824	2.4859	0.230493	2.2554	0	3.67078	0.0928276	0.0162158	0.0109765
2012-04-15	2012	4	-0.434618	0.364	3226		2923.07	280.639	0.782926	0.595412	4.69817	0	13.6176	2.54056	0.0625025	0	0	0		5.58065	0.223527	3.36004	3.55834	0.409351	3.14899	5.04909e-06	2.29975	0.0898332	0.0156927	0.011703
2012-05-15	2012	5	-1.14109		3225.3		2922.98	280.748	0.843568	0.723351	4.02616	0.0359321	13.3986	2.52111	0.0242976	0	0	0		2.23869	1.3565	3.28423	3.21798	0.450274	2.76771	0.000964681	4.70913	0.0928276	0.0162158	0.0132417
2012-06-15	2012	6	-3.08185	-4.523	3223.36		2922.73	280.798	1.13819	0.746809	3.76329	0.0359321	11.818	2.29008	0.0385761	0	0	0		1.5473	0.187375	1.81295	2.32402	0.595442	1.72858	0.0180742	0.826588	0.0898332	0.0156927	0.0134088
2012-07-15	2012	7	-3.674	-4.797	3222.77		2922.62	280.452	1.36386	0.962085	5.36535	0.146368	9.02354	2.6803	0.150381	0	0	0		6.33582	1.20801	5.92817	4.96162	0.716836	4.24479	0.441101	4.34192	0.0928276	0.0162158	0.0138421
2012-08-15	2012	8	-3.98276	-4.7335	3222.46		2922.91	279.327	1.54551	0.816733	7.40336	0.113679	7.18021	2.95066	0.214037	0	0	0		9.5201	1.37672	6.20546	5.17921	0.822454	4.35675	1.33192	3.07906	0.0928276	0.0162158	0.0134611
2012-09-15	2012	9	-0.868196	-1.4904	3225.57		2923.58	279.382	1.89817	0.529716	9.4319	0.170933	6.81613	3.5494	0.210542	0	0	0		10.0799	3.82982	6.00836	4.88584	0.985146	3.90069	0.139502	2.61035	0.0898332	0.0156927	0.0123744
2012-10-15	2012	10	-4.80186		3221.64		2923.69	279.459	1.22543	0.653066	6.68877	0.170948	7.09768	2.64275	0.0150754	0	0	0		1.52293	2.58476	2.3728	2.64516	0.647126	1.99804	5.56522e-06	3.34776	0.0928276	0.0162158	0.011824
2012-11-15	2012	11	-6.28595	-6.1406	3220.15		2923.68	279.538	0.887959	0.503481	5.71744	0.104894	7.47494	2.23242	0.0098095	0	0	0		0.83828	0.846234	0.512758	1.31597	0.458113	0.857854	0	0.737195	0.0898332	0.0156927	0.0104109
2012-12-15	2012	12	-6.09847	-7.6398	3220.34		2922.41	279.706	0.605348	0.802263	5.72357	0	8.44448	2.63658	0.0143996	0	0	0		3.17207	0.646495	1.25397	3.01314	0.324085	2.68905	0	5.36931	0.0928276	0.0162158	0.00979135
2013-01-15	2013	1	-5.79475	-5.6547	3220.64		2922.4	279.848	0.439581	0.253066	5.26363	0.051247	9.90782	2.46644	0.0129879	0	0	0		2.47013	1.34018	1.26141	1.32432	0.232513	1.09181	0	1.7783	0.0936519	0.0161234	0.00949592
2013-02-15	2013	2	-1.34347	-2.3768	3225.1		2922.67	280.13	0.730354	0.108713	5.65047	0.051247	12.6342	3.01372	0.111378	0	0	0		9.55704	1.18084	2.22059	2.78446	0.362062	2.4224	0	0.348512	0.0845888	0.0145631	0.009093
2013-03-15	2013	3	0.823596		3227.26		2922.88	280.291	0.942834	0.213292	5.64741	0.051247	14.3541	2.8081	0.079806	0	0	0		5.73555	1.83605	3.04624	2.95009	0.521582	2.42851	0	2.14949	0.0936519	0.0161234	0.0112288
2013-04-15	2013	4	1.08298	0.514	3227.52		2922.75	280.44	1.13281	0.630695	5.17526	0	14.7014	2.64147	0.0538588	0	0	0		4.47758	1.40217	3.28943	3.52243	0.607303	2.91513	7.34414e-06	3.02	0.0906309	0.0156033	0.0118188
2013-05-15	2013	5	-0.448077	-0.1156	3225.99		2922.65	280.595	1.06632	0.7438	4.28819	0.0345113	13.9556	2.60801	0.0540972	0	0	0		1.96964	1.24998	3.16024	3.80585	0.577949	3.2279	0.00248064	4.70075	0.0936519	0.0161234	0.0134968
2013-06-15	2013	6	-0.975284	-0.6133	3225.46		2922.65	280.647	1.75677	0.650309	5.70315	0.0345113	11.0346	2.77456	0.209351	0	0	0		6.64957	0.530768	3.21171	4.44217	0.922684	3.51949	0.0895873	0.546356	0.0906309	0.0156033	0.0134775
2013-07-15	2013	7	-0.672495	-1.0841	3225.77		2922.98	280.023	2.02417	0.736086	8.35296	0.142704	8.25361	3.02824	0.222826	0	0	0		7.40229	2.78833	6.1591	5.3769	1.07934	4.29756	0.745514	3.29376	0.0936519	0.0161234	0.0138595
2013-08-15	2013	8	0.999596		3227.44		2923.7	278.755	2.38679	0.482389	11.191	0.111147	6.8397	3.50464	0.467019	0	0	0		13.3807	4.74762	7.10037	6.20953	1.29519	4.91434	1.55355	2.49917	0.0936519	0.0161234	0.0134388
2013-09-15	2013	9	-2.86066		3223.58		2923.88	278.653	1.72414	0.982453	8.57032	0.166454	6.67194	2.87684	0.0573276	0	0	0		3.27152	3.77106	4.07918	3.7171	0.890806	2.8263	0.17813	4.40867	0.0906309	0.0156033	0.0128073
2013-10-15	2013	10	-5.98197	-5.2951	3220.46		2923.96	278.73	1.1146	0.766909	6.34495	0.166469	6.73147	2.63365	0.013283	0	0	0		1.80573	1.36266	2.51177	2.73252	0.58933	2.14319	0.004861	3.45072	0.0936519	0.0161234	0.0124648
2013-11-15	2013	11	-6.24177	-5.6174	3220.2		2923.96	278.788	0.905019	0.584839	6.0975	0.100716	7.33154	2.41871	0.0126426	0	0	0		1.57134	0.574292	0.832622	1.55492	0.472371	1.08255	0	0.603216	0.0906309	0.0156033	0.0104058
2013-12-15	2013	12	-7.30222	-8.0006	3219.14		2922.83	278.89	0.551903	0.857587	5.76745	0	7.70156	2.5315	0.010153	0	0	0		1.06393	0.582831	0.900716	2.84912	0.295318	2.5538	0	5.45389	0.0936519	0.0161234	0.00990171
2014-01-15	2014	1	-7.50227	-7.218	3218.94		2922.74	279.007	0.359348	0.286775	5.20547	0.0490949	8.89933	2.37676	0.0123089	0	0	0		2.59673	1.31133	1.25052	1.36916	0.187406	1.18176	0	2.10276	0.0944089	0.0160096	0.00967851
2014-02-15	2014	2	-5.01973		3221.42		2922.71	279.242	0.441069	0.282141	4.9481	0.0490949	11.0197	2.70013	0.026222	0	0	0		4.62852	0.661504	1.6882	2.07502	0.212796	1.86223	0	1.03047	0.0852726	0.0144603	0.00907144
2014-03-15	2014	3	-1.50259	-1.97	3224.94		2922.93	279.585	0.737444	0.203323	5.19467	0.0490949	13.2486	2.87085	0.122406	0	0	0		9.57614	0.887206	2.78481	3.35165	0.405198	2.94645	0	1.91172	0.0944089	0.0160096	0.0109591
2014-04-15	2014	4	0.55645	-0.8956	3227		2922.89	279.766	1.07157	0.508325	5.31571	0	14.6628	2.73771	0.0440273	0	0	0		4.69697	1.39328	3.22524	3.05846	0.573486	2.48497	2.84585e-06	2.79389	0.0913635	0.0154932	0.0118911
2014-05-15	2014	5	-0.415799	1.9079	3226.02		2922.77	279.908	1.09772	0.586869	4.9719	0.033376	13.8472	2.74743	0.0614927	0	0	0		4.39832	1.30707	3.86456	3.84418	0.595835	3.24834	0.00242394	3.55563	0.0944089	0.0160096	0.0131719
2014-06-15	2014	6	-2.64235	-0.6613	3223.8		2922.66	279.933	1.41797	0.532858	4.844	0.033376	11.8081	2.48068	0.0845164	0	0	0		2.0834	1.04148	2.03099	2.89531	0.745995	2.14932	0.0417523	0.689495	0.0913635	0.0154932	0.0138129
2014-07-15	2014	7	-3.65316		3222.79		2922.75	279.435	1.65367	0.764602	6.45909	0.135957	8.54387	2.8575	0.191518	0	0	0		6.96459	1.67747	5.99299	4.9941	0.875594	4.1185	0.645817	3.41719	0.0944089	0.0160096	0.0140396
2014-08-15	2014	8	-4.71584	-3.7863	3221.72		2922.91	278.812	1.55886	0.776404	7.61963	0.105537	6.97654	2.83195	0.13462	0	0	0		5.8289	1.54545	5.60535	4.10248	0.828599	3.27388	0.794904	4.1814	0.0944089	0.0160096	0.0138133
2014-09-15	2014	9	-1.8053	-3.5482	3224.63		2923.52	278.873	1.91051	0.788815	8.89458	0.158765	6.95233	2.97803	0.555127	0	0	0		9.12596	3.35819	4.3032	5.46518	0.986558	4.47862	0.11748	3.2687	0.0913635	0.0154932	0.0128421
2014-10-15	2014	10	-5.11937	-4.2389	3221.32		2923.6	278.981	1.21346	0.732188	6.77594	0.158783	7.19532	2.63619	0.0288529	0	0	0		2.48672	1.6089	2.59133	2.98359	0.64329	2.3403	8.15179e-05	3.11517	0.0944089	0.0160096	0.0123039
2014-11-15	2014	11	-6.07376	-5.1893	3220.37		2923.57	279.087	0.993381	0.535031	6.00798	0.0957625	7.81832	2.24879	0.0103487	0	0	0		1.24808	1.02728	0.686831	1.43275	0.519884	0.912867	0	0.60349	0.0913635	0.0154932	0.010605
2014-12-15	2014	12	-6.96021		3219.48		2922.49	279.163	0.602395	0.884175	5.55285	0	8.21734	2.55956	0.0102934	0	0	0		0.88663	0.561781	0.800007	2.91095	0.32175	2.5892	0	5.73037	0.0944089	0.0160096	0.00986265
2015-01-15	2015	1	-7.41259	-5.8992	3219.03		2922.42	279.28	0.393416	0.240563	5.11379	0.0497539	9.11069	2.41051	0.0122866	0	0	0		2.87602	1.41483	1.36465	1.36206	0.206918	1.15514	0	1.55597	0.106766	0.0177286	0.0097495
2015-02-15	2015	2	-4.91714	-4.8001	3221.52		2922.48	279.583	0.510899	0.248101	4.7299	0.0497539	11.101	2.72669	0.0955601	0	0	0		7.42689	0.574317	2.14184	2.62931	0.246959	2.38235	0	1.11148	0.0964342	0.0160129	0.00949508
2015-03-15	2015	3	1.79138	0.9578	3228.23		2922.85	279.876	1.11404	0.120674	6.36702	0.0497539	14.5629	3.12607	0.162116	0	0	0		10.6981	1.92001	2.96971	3.57224	0.616943	2.9553	0	1.35676	0.106766	0.0177286	0.0110933
2015-04-15	2015	4	3.65034	3.9694	3230.09		2922.96	280.087	1.46394	0.494738	6.11495	0	15.9057	2.95958	0.107355	0	0	0		5.94149	2.59582	3.41611	3.7589	0.783998	2.9749	5.72231e-06	2.8933	0.103322	0.0171567	0.0121983
2015-05-15	2015	5	1.97345	2.8148	3228.41		2922.78	280.21	1.2911	0.746586	5.10628	0.0339645	15.435	2.75212	0.0566658	0	0	0		3.25979	1.21811	3.69051	4.19401	0.703936	3.49007	0.00308731	4.26982	0.106766	0.0177286	0.0136797
2015-06-15	2015	6	0.341863		3226.78		2922.73	280.303	1.55291	0.596503	5.21886	0.0339645	13.6444	2.61092	0.0882449	0	0	0		4.02783	1.21769	2.53621	3.27425	0.81943	2.45482	0.0337706	0.593586	0.103322	0.0171567	0.0134757
2015-07-15	2015	7	1.69575	2.9093	3228.14		2923.19	279.637	2.34726	0.54282	8.81671	0.136213	9.49854	3.4476	0.521171	0	0	0		13.2379	2.2374	7.16487	7.30677	1.25835	6.04842	0.8821	2.0777	0.106766	0.0177286	0.0138787
2015-08-15	2015	8	2.10174	3.847	3228.54		2923.66	278.799	2.71487	0.381337	11.8661	0.10524	7.13276	3.58158	0.299599	0	0	0		8.73179	6.59247	6.56562	5.37744	1.46771	3.90973	1.01509	2.75668	0.106766	0.0177286	0.0137854
2015-09-15	2015	9	-3.07762	-0.1817	3223.36		2923.69	278.906	1.77404	0.912598	8.02012	0.158967	7.02319	2.79508	0.080035	0	0	0		4.90561	3.46052	4.08265	3.87882	0.911876	2.96695	0.0490435	3.89299	0.103322	0.0171567	0.0129075
2015-10-15	2015	10	-4.71021		3221.73		2923.79	279.038	1.25922	0.62048	6.62534	0.158982	7.51221	2.69633	0.0297768	0	0	0		3.35732	1.64246	2.69241	2.9076	0.666613	2.24099	0.000136032	3.13265	0.106766	0.0177286	0.0124806
2015-11-15	2015	11	-4.00646		3222.43		2923.79	279.217	1.17152	0.482353	6.50732	0.0965598	8.70163	2.4485	0.0165626	0	0	0		2.35327	1.01087	0.872668	1.76513	0.616018	1.14911	0	0.585208	0.103322	0.0171567	0.0107181
2015-12-15	2015	12	-4.90279	-5.8363	3221.54		2922.68	279.334	0.735427	0.806496	5.95911	0	9.39082	2.61708	0.0119051	0	0	0		1.51603	0.557542	1.02654	2.87922	0.395495	2.48373	0	5.42488	0.106766	0.0177286	0.0100837
2016-01-15	2016	1	-5.25249	-1.444	3221.19		2922.61	279.478	0.498953	0.306629	5.60227	0.0499996	10.2651	2.36507	0.013273	0	0	0		2.3385	1.26865	1.45035	1.66751	0.26402	1.40349	0	1.87539	0.107515	0.0176123	0.0100118
2016-02-15	2016	2	-5.17109	-2.4224	3221.27		2922.55	279.576	0.376699	0.368108	4.69851	0.0499996	11.2147	2.42223	0.0148906	0	0	0		1.71831	0.540725	1.63787	1.868	0.184452	1.68355	0	2.06279	0.100579	0.0164761	0.0100076
2016-03-15	2016	3	-2.4472	0.8033	3223.99		2922.74	279.881	0.679426	0.231911	4.97754	0.0499996	12.5309	2.8061	0.0974185	0	0	0		9.28687	0.630647	3.25582	3.33394	0.369359	2.96459	1.26482e-07	1.98096	0.107515	0.0176123	0.0115683
2016-04-15	2016	4	-0.0933628		3226.35		2922.54	280.134	1.06363	0.654015	5.05331	0	14.1788	2.66079	0.0650861	0	0	0		4.78992	1.28325	3.28756	3.47947	0.563761	2.91571	4.20146e-05	3.68579	0.104047	0.0170442	0.0124248
2016-05-15	2016	5	-1.67864	1.0538	3224.76		2922.34	280.227	1.04472	0.790032	4.1684	0.0342276	13.35	2.74464	0.0617017	0	0	0		3.71591	0.978776	3.99196	4.28658	0.56199	3.72459	0.00808083	4.60101	0.107515	0.0176123	0.0141478
2016-06-15	2016	6	-3.09102	-0.8848	3223.35		2922.3	280.15	1.58197	0.652833	5.10975	0.0342276	10.8096	2.55763	0.153538	0	0	0		4.71976	0.647606	3.17237	3.7892	0.830305	2.9589	0.160085	0.646006	0.104047	0.0170442	0.0141174
2016-07-15	2016	7	-2.85922	-0.9156	3223.58		2922.6	279.274	1.99296	0.587395	7.78202	0.136518	7.80162	3.16827	0.234164	0	0	0		10.0074	2.94255	6.80163	5.31075	1.06832	4.24243	1.06646	2.58692	0.107515	0.0176123	0.0142563
2016-08-15	2016	8	-3.39383	-1.1356	3223.05		2922.96	278.309	1.86364	0.540268	8.96023	0.105292	6.89613	3.26095	0.146678	0	0	0		9.03834	3.65191	6.57647	4.37174	1.0047	3.36704	1.19429	2.65784	0.107515	0.0176123	0.0139106
2016-09-15	2016	9	-6.60024		3219.84		2923.05	278.137	1.28088	0.887607	6.85471	0.159166	6.75011	2.69913	0.0227357	0	0	0		2.2524	2.94866	4.00412	2.98292	0.652198	2.33072	0.235805	4.54903	0.104047	0.0170442	0.0133251
2016-10-15	2016	10	-9.59472		3216.84		2923.06	278.2	0.776766	0.818809	4.65566	0.159181	6.80764	2.35159	0.0119143	0	0	0		0.68195	0.826168	1.86401	2.56614	0.401401	2.16474	0.000883669	3.62098	0.107515	0.0176123	0.0128266
2016-11-15	2016	11	-10.617	-11.6195	3215.82		2923.04	278.331	0.562308	0.590402	4.0039	0.096835	7.05299	2.13371	0.0111371	0	0	0		0.716815	0.316237	0.442187	1.1874	0.28618	0.901216	9.18017e-07	0.614621	0.104047	0.0170442	0.0109947
2016-12-15	2016	12	-11.2856	-11.9298	3215.15		2921.62	278.388	0.388203	0.917291	3.97284	0	7.48834	2.36663	0.0115455	0	0	0		0.649724	0.364752	0.938341	2.89754	0.203448	2.6941	0	5.88629	0.107515	0.0176123	0.0106029
2017-01-15	2017	1	-10.2537	-7.3507	3216.19		2921.67	278.494	0.392542	0.223725	3.82376	0.0502452	9.01989	2.45783	0.0550464	0	0	0		7.73908	1.41394	1.62712	2.08664	0.20841	1.87823	0	1.34712	0.108204	0.0174803	0.00992403
2017-02-15	2017	2	-5.52114		3220.92		2921.87	278.776	0.680879	0.331342	4.15229	0.0502452	12.2695	2.73516	0.0549161	0	0	0		4.50071	1.15019	2.03227	2.46374	0.332641	2.1311	0	1.66792	0.0977326	0.0157886	0.00978488
2017-03-15	2017	3	-5.5579	-4.4159	3220.88		2921.8	279	0.591446	0.372573	3.19452	0.0502452	13.2653	2.58306	0.0290994	0	0	0		3.38421	0.970404	2.54323	2.4249	0.316129	2.10878	0	3.51689	0.108204	0.0174803	0.011692
2017-04-15	2017	4	-4.63129	-4.55	3221.81		2921.37	279.27	0.846118	0.803656	3.03203	0	13.8054	2.59996	0.0816542	0	0	0		4.6555	0.211836	3.07006	3.77943	0.438664	3.34077	4.48604e-05	3.63072	0.104713	0.0169164	0.0128988
2017-05-15	2017	5	-4.9307	-4.8364	3221.51		2921.27	279.328	0.912351	0.790995	3.31651	0.0344906	13.1328	2.67114	0.0534253	0	0	0		3.32413	0.334902	3.79555	4.06701	0.484714	3.58229	0.00923969	4.46338	0.108204	0.0174803	0.0142495
2017-06-15	2017	6	-5.71787	-6.7984	3220.72		2921.29	279.328	1.48427	0.55284	4.50138	0.0344906	10.7441	2.65627	0.12617	0	0	0		5.68881	0.655105	3.06106	3.66397	0.775625	2.88835	0.152644	0.527508	0.104713	0.0169164	0.0139527
2017-07-15	2017	7	-5.023		3221.42		2921.67	278.114	1.94125	0.596005	7.78441	0.136819	7.67618	3.24787	0.251442	0	0	0		9.54505	2.7666	6.95469	5.47127	1.03379	4.43748	1.42802	2.54751	0.108204	0.0174803	0.0144262
2017-08-15	2017	8	-5.9669		3220.47		2922.01	276.911	1.84935	0.692654	8.94127	0.105343	6.62251	3.17918	0.161902	0	0	0		7.16973	3.35458	6.00093	4.36585	0.991669	3.37418	1.40975	3.49443	0.108204	0.0174803	0.0142851
2017-09-15	2017	9	-8.49868		3217.94		2922.1	276.889	1.2889	0.850538	7.2527	0.159364	6.5668	2.8029	0.0260411	0	0	0		3.04074	2.5453	4.00631	3.08968	0.65678	2.4329	0.144935	4.32365	0.104713	0.0169164	0.0133146
2017-10-15	2017	10	-11.7728		3214.67		2922.09	276.952	0.789883	0.829124	4.80116	0.159379	6.65498	2.37725	0.0117037	0	0	0		0.451911	1.05281	1.8147	2.57256	0.407709	2.16485	0.000970689	3.67823	0.108204	0.0174803	0.0129862
2017-11-15	2017	11	-12.3954		3214.04		2922.12	277.004	0.616334	0.616182	4.41785	0.0971103	6.88965	2.26709	0.0134403	0	0	0		1.32329	0.326134	0.697687	1.40553	0.315166	1.09037	1.62183e-06	0.58474	0.104713	0.0169164	0.010806
2017-12-15	2017	12	-12.4597		3213.98		2920.95	277.165	0.456544	0.856065	4.42744	0	7.51273	2.59491	0.013458	0	0	0		2.11595	0.511955	1.1249	2.87483	0.24183	2.633	0	5.52477	0.108204	0.0174803	0.0102929
2018-01-15	2018	1	-13.2086		3213.23		2920.89	277.49	0.302425	0.321248	3.74439	0.0504905	8.14225	2.2813	0.0116761	0	0	0		1.00921	1.36189	1.17669	1.36722	0.154948	1.21227	0	2.14642	0.108857	0.0173442	0.0101832
2018-02-15	2018	2	-12.5113		3213.93		2920.84	277.635	0.289772	0.376193	3.04946	0.0504905	9.17151	2.49327	0.0204549	0	0	0		3.54106	0.320359	1.95678	2.19556	0.135888	2.05967	0	1.50324	0.0983223	0.0156657	0.00991004
2018-03-15	2018	3	-11.4868		3214.95		2920.82	277.794	0.424934	0.38518	2.70381	0.0504905	10.2806	2.46588	0.0253585	0	0	0		3.79584	0.610328	2.81971	2.38902	0.224934	2.16409	0	3.85765	0.108857	0.0173442	0.0121892
2018-04-15	2018	4	-10.9358		3215.5		2920.45	277.979	0.661956	0.749609	2.42501	0	10.6821	2.51559	0.0435112	0	0	0		4.58293	0.0898518	3.21097	3.43621	0.345921	3.09029	3.74551e-05	3.34447	0.105345	0.0167847	0.0128877
2018-05-15	2018	5	-10.1151		3216.32		2920.36	278.136	0.791334	0.768441	2.5668	0.0347537	11.0306	2.59762	0.0353444	0	0	0		4.16965	0.187858	3.5729	3.70114	0.425527	3.27561	0.00199573	4.45807	0.108857	0.0173442	0.0140966
2018-06-15	2018	6	-11.1454	-13.0726	3215.29		2920.2	278.168	1.26506	0.685038	2.96084	0.0347537	9.39183	2.50251	0.0854994	0	0	0		4.55657	0.524284	2.58048	3.02064	0.665906	2.35473	0.0890359	0.577381	0.105345	0.0167847	0.0142317
2018-07-15	2018	7	-9.75228	-13.4731	3216.69		2920.59	277.369	1.66039	0.590068	5.49132	0.137121	7.42292	3.17401	0.250647	0	0	0		10.3119	1.91564	6.425	5.3451	0.887541	4.45756	1.00826	2.26617	0.108857	0.0173442	0.0145455
2018-08-15	2018	8	-9.90656		3216.53		2920.99	275.643	1.71477	0.679796	7.58997	0.105395	6.51781	3.13208	0.162026	0	0	0		6.95945	2.35829	5.71752	4.32323	0.922258	3.40097	1.89026	3.76961	0.108857	0.0173442	0.014526
2018-09-15	2018	9	-10.6908		3215.75		2921.14	275.673	1.36484	0.999427	6.98986	0.159562	6.52509	2.77714	0.120953	0	0	0		5.38328	2.10666	3.8697	3.87511	0.701008	3.1741	0.154978	3.74227	0.105345	0.0167847	0.0134832
2018-10-15	2018	10	-11.9694	-14.2444	3214.47		2921.27	275.781	0.999545	0.721788	5.75358	0.159578	7.14663	2.60297	0.0342307	0	0	0		1.79529	1.62842	2.19413	2.66039	0.526917	2.13347	1.9921e-06	3.29498	0.108857	0.0173442	0.0126796
2018-11-15	2018	11	-12.4299	-14.1153	3214.01		2921.26	275.934	0.787603	0.577555	5.04127	0.0973857	7.98516	2.3124	0.0134547	0	0	0		1.90743	0.362904	0.712447	1.41574	0.40689	1.00885	0	0.538864	0.105345	0.0167847	0.0110745
2018-12-15	2018	12	-12.6318	-16.4981	3213.81		2919.98	275.985	0.528219	0.917369	5.13005	0	8.56873	2.68832	0.0117202	0	0	0		1.13544	0.702461	1.01593	3.00678	0.281083	2.7257	0	5.82665	0.108857	0.0173442	0.0102874
		1.98079	RMSE = 1.98 cm

## Sheet: Indus-TSA
Date	Year	Month	TWS_anom	TWS_Season	TWS-Residuals	TWS	Aqf_Storage	Aqf_Storage_Season	Aqf_Storage_Res	glVolume	glVolume_Season	glVolume_Residuals	grdWater	grdWater_season	grdWater_Residuals	irrRffStorage	irrRffStorage_Season	irrRffStorage_Residuals	resStorage	resStorage_Seasonal	resStorage_Residuals	ricePaddyStrg	ricePaddyStrg_Seasonal	ricePaddyStrg_Residuals	snowPack	snowPack_Season	snowPack_Residuals	soilMoist	soilMoist_Season	soilMoist_Residuals	surfRffStorage	surfRffStorage_Season	surfRffStorage_Residuals	UGW	smResStrg	endoStrg		precip	discharge	evapotrans	runoff	baseflow	surfRunoff	glMelt	irrigationGross	domUseGross	indUseGross	stkUseGross
1990-01-15	1990	1
1990-02-15	1990	2
1990-03-15	1990	3
1990-04-15	1990	4
1990-05-15	1990	5
1990-06-15	1990	6
1990-07-15	1990	7	22.2065	1.96699	0.400595		10.2784	-0.123101	0.139764	2.8238	0.175076	0.0110401	0.266093	0.820443	0.314969	-0.0998828	0.0946709	-0.0297223	1.3455	1.79906	1.23019	-0.00854659	0.0639562	-0.00762044	0.580234	-1.46464	-1.46495	-0.023772	0.3819	0.00205258	0.0447512	0.219623	0.204923
1990-08-15	1990	8	22.1423	1.74735	-0.633008		10.2748	0.304389	0.0171037	2.76295	-0.768633	-0.153105	0.26067	0.925179	0.0391314	-0.101684	0.0168166	-0.0362983	1.32989	3.66178	0.589485	-0.00849618	0.0334991	-0.00285383	0.595688	-3.11782	-1.09168	-0.0171305	0.546023	0.0236468	0.0456134	0.146102	-0.0183907
1990-09-15	1990	9	22.0608	-0.169949	-1.07327		10.2725	0.56428	0.0305074	2.70259	-0.737432	-0.340067	0.25961	0.524142	0.0818042	-0.0979104	0.243249	-0.0618863	1.31342	2.21627	0.356992	-0.00844577	0.0865215	-0.00920673	0.595196	-3.2922	-1.10732	-0.0226194	0.222303	-0.0399821	0.0465036	0.00292341	0.0158484
1990-10-15	1990	10	22.0327	-2.94576	-1.97383		10.2645	0.672935	-0.0703757	2.64542	-0.624436	-0.308278	0.257781	-0.0460159	-0.0608793	-0.093475	0.142511	-0.0334559	1.28903	0.0737233	-0.165698	-0.00839536	0.0865161	-0.00922789	0.665763	-3.00158	-1.22604	-0.0279387	-0.174535	-0.0556792	0.0400175	-0.0749092	-0.0442567
1990-11-15	1990	11	22.0653	-3.56976	-2.79616		10.2609	0.728646	-0.19115	2.59109	-0.507164	-0.330081	0.273026	-0.272013	-0.148678	-0.101068	-0.0386549	0.00864759	1.3257	-0.511191	-0.64653	-0.00839536	0.0236834	-0.0034808	0.703434	-2.4657	-1.301	-0.0249639	-0.450049	-0.134901	0.045583	-0.0773345	-0.0488976
1990-12-15	1990	12	22.2236	-3.48013	-2.10056	TWS	10.2626	-0.445563	-0.00371661	2.5544	-0.341692	-0.104892	0.292155	-0.51695	-0.186011	-0.110186	0.275814	0.050608	1.3598	-0.507689	-0.739687	-0.00835279	-0.0724734	0.0084075	0.854407	-1.70396	-1.10874	-0.0283796	-0.0930144	0.00940624	0.0471592	-0.0746025	-0.0259828
1991-01-15	1991	1	22.432	-2.9116	0.23458	-2.19003	10.2603	-0.393371	-0.0431119	2.52168	-0.13915	0.0103507	0.306924	-0.630247	-0.0798864	-0.109108	-0.336774	0.0589225	1.36946	-0.837353	-0.123389	-0.00831022	-0.0232299	0.0026688	1.07935	-0.27042	0.290762	-0.0302063	-0.2138	0.148332	0.0419416	-0.0672503	-0.0300603
1991-02-15	1991	2	22.3819	-0.425671	0.830849	-0.692784	10.2306	-0.273069	-0.0250469	2.54244	0.121046	-0.00635319	0.267837	-0.549732	-0.000692016	-0.0847444	-0.293661	0.0375727	1.10023	-1.12843	0.173668	-0.00818211	-0.0232802	0.00259102	1.37917	1.75588	0.607728	-0.068182	0.00350758	0.0541963	0.0227365	-0.0379232	-0.0128309
1991-03-15	1991	3	22.3534	1.77262	1.64936	0.990091	10.1895	-0.148666	-0.00316874	2.61679	0.404473	-0.041586	0.259986	-0.394002	0.00957274	-0.0645614	-0.281057	0.0109951	0.954199	-1.24604	0.102034	-0.0080964	-0.0233124	0.00253754	1.48056	3.47054	1.45323	-0.0985532	0.0132886	0.124716	0.0235848	-0.0226033	-0.0090576
1991-04-15	1991	4	22.3536	3.14079	3.2234	2.40767	10.1361	-0.351079	0.314641	2.70854	0.636059	-0.122064	0.248953	-0.138559	0.242119	-0.0489668	0.0471379	-0.165129	0.86265	-1.2517	1.01043	-0.00795629	-0.0726304	0.008168	1.54045	4.35013	1.7287	-0.102223	-0.0560008	0.165529	0.0160185	-0.022553	0.0410552
1991-05-15	1991	5	22.4341	2.52636	2.87269	3.18012	10.0858	-0.455358	0.401403	2.79894	0.800123	-0.133645	0.247738	-0.103382	0.200636	-0.0430418	0.138744	-0.11638	0.826621	-1.53611	0.508302	-0.00781625	-0.0396406	0.00356745	1.61426	3.79074	1.95204	-0.10433	-0.0387069	0.01495	0.0159514	-0.0300407	0.0419211
1991-06-15	1991	6	22.5038	1.48845	2.22001	3.10046	10.0375	-0.446381	0.369619	2.88956	0.840198	-0.237817	0.244154	0.365738	0.101478	-0.0404855	-0.00936348	-0.0374931	0.800394	-0.837148	0.365684	-0.00772694	-0.0396797	0.00351721	1.67676	1.72429	1.67895	-0.112356	-0.140732	-0.0142704	0.0159449	0.0315372	-0.00974671
1991-07-15	1991	7	22.5542	1.96699	-0.548923	2.19003	9.97037	-0.123101	0.0910579	2.96894	0.175076	0.115011	0.241033	0.820443	-0.129019	-0.0331109	0.0946709	0.195873	0.783646	1.79906	-1.43876	-0.00772694	0.0639562	-0.00690267	1.72776	-1.46464	0.98538	-0.110521	0.3819	-0.366908	0.0138519	0.219623	0.00536107
1991-08-15	1991	8	22.4416	1.74735	-1.2737	0.692784	9.90276	0.304389	-0.103543	3.03985	-0.768633	0.462153	0.231788	0.925179	-0.0262011	-0.0345593	0.0168166	0.138774	0.724592	3.66178	-0.557564	-0.00767695	0.0334991	-0.0026446	1.68374	-3.11782	-0.963086	-0.114593	0.546023	-0.243345	0.0156527	0.146102	0.0217501
1991-09-15	1991	9	22.5124	-0.169949	-1.5229	-0.990091	9.84742	0.56428	-0.185048	3.10437	-0.737432	0.35917	0.238818	0.524142	-0.0297931	-0.0407822	0.243249	0.0681203	0.71802	2.21627	-0.146192	-0.00762695	0.0865215	-0.00834422	1.72598	-3.2922	-1.51945	-0.0907277	0.222303	-0.0159151	0.0169004	0.00292341	-0.0453437
1991-10-15	1991	10	22.5202	-2.94576	-1.49519	-2.40767	9.7904	0.672935	-0.200543	3.17964	-0.624436	0.242373	0.237589	-0.0460159	-0.0552695	-0.0405898	0.142511	-0.0152403	0.68365	0.0737233	0.00733316	-0.00757696	0.0865161	-0.00836582	1.74453	-3.00158	-1.41905	-0.0864376	-0.174535	-0.0224546	0.0190122	-0.0749092	-0.0240571
1991-11-15	1991	11	22.5361	-3.56976	-2.43068	-3.18012	9.73233	0.728646	-0.241402	3.24935	-0.507164	0.0990601	0.224095	-0.272013	-0.142754	-0.0379981	-0.0386549	-0.0237466	0.616611	-0.511191	-0.252167	-0.00757696	0.0236834	-0.00322747	1.83386	-2.4657	-1.68147	-0.0901521	-0.450049	-0.166033	0.0155716	-0.0773345	-0.018964
1991-12-15	1991	12	22.5568	-3.48013	-1.82828	-3.10046	9.67457	-0.445563	-0.221836	3.31291	-0.341692	0.0891998	0.212758	-0.51695	-0.144075	-0.0378726	0.275814	0.0667889	0.57949	-0.507689	-0.160358	-0.00753438	-0.0724734	0.00758909	1.90047	-1.70396	-1.5427	-0.0910822	-0.0930144	0.0941347	0.0131085	-0.0746025	-0.0170477
1992-01-15	1992	1	22.5481	-2.9116	-1.23381		9.62056	-0.393371	-0.214641	3.37713	-0.13915	0.00573495	0.202051	-0.630247	-0.0859473	-0.0395013	-0.336774	-0.0280648	0.513149	-0.837353	0.0242687	-0.0074918	-0.0232299	0.00245031	1.9641	-0.27042	-1.12228	-0.0964317	-0.2138	0.165689	0.014623	-0.0672503	0.0188671
1992-02-15	1992	2	22.6558	-0.425671	1.40664		9.581	-0.273069	-0.0395326	3.43327	0.121046	-0.122951	0.219945	-0.549732	0.131564	-0.0553139	-0.293661	-0.0665324	0.592474	-1.12843	0.602563	-0.00736343	-0.0232802	0.00237228	1.93357	1.75588	0.560213	-0.0650203	0.00350758	0.337418	0.0232923	-0.0379232	0.00158634
1992-03-15	1992	3	22.8913	1.77262	1.20541		9.56263	-0.148666	-0.0606028	3.4611	0.404473	0.0173561	0.264048	-0.394002	-0.00924747	-0.0823244	-0.281057	0.0310666	0.748417	-1.24604	-0.104626	-0.00727825	-0.0233124	0.00231932	1.92055	3.47054	1.23583	-0.00975197	0.0132886	0.0873963	0.0338815	-0.0226033	0.00598714
1992-04-15	1992	4	23.2052	3.14079	2.56233		9.56526	-0.351079	0.188746	3.50314	0.636059	-0.0801199	0.325421	-0.138559	0.00373367	-0.111252	0.0471379	-0.071744	0.92944	-1.2517	0.139164	-0.00713846	-0.0726304	0.00735017	1.92916	4.35013	2.41192	0.0210385	-0.0560008	-0.00230698	0.050122	-0.022553	-0.0343357
1992-05-15	1992	5	23.3799	2.52636	2.17577		9.56007	-0.455358	0.234004	3.54847	0.800123	-0.120387	0.358668	-0.103382	-0.0463415	-0.116099	0.138744	-0.0418174	1.01782	-1.53611	-0.128346	-0.00699874	-0.0396406	0.00326086	1.93442	3.79074	2.43121	0.0333189	-0.0387069	-0.133859	0.0502455	-0.0300407	-0.0219299
1992-06-15	1992	6	23.5494	1.48845	1.07053		9.55403	-0.446381	0.204946	3.59498	0.840198	-0.1727	0.378253	0.365738	-0.161109	-0.118996	-0.00936348	0.0214736	1.09994	-0.837148	-0.729958	-0.00690905	-0.0396797	0.00321024	1.94337	1.72429	2.17588	0.0543655	-0.140732	-0.245186	0.0503528	0.0315372	-0.0259805
1992-07-15	1992	7	23.6636	1.96699	-0.366155		9.57218	-0.123101	0.0146419	3.636	0.175076	0.121659	0.38823	0.820443	-0.0614879	-0.129033	0.0946709	0.102042	1.16459	1.79906	-0.867811	-0.00690905	0.0639562	-0.00618006	1.93984	-1.46464	0.407005	0.0485124	0.3819	-0.149004	0.0502655	0.219623	0.0729791
1992-08-15	1992	8	23.8459	1.74735	0.147098		9.5877	0.304389	-0.00893802	3.69181	-0.768633	0.144205	0.393046	0.925179	0.341784	-0.125748	0.0168166	-0.0941635	1.24328	3.66178	0.795066	-0.00685935	0.0334991	-0.00244002	1.96314	-3.11782	-1.3987	0.0524648	0.546023	0.252817	0.0471044	0.146102	0.117368
1992-09-15	1992	9	23.5624	-0.169949	1.19406		9.57696	0.56428	0.116913	3.74763	-0.737432	0.220363	0.363839	0.524142	0.581654	-0.108631	0.243249	-0.211158	1.18662	2.21627	1.55749	-0.00680965	0.0865215	-0.00748408	1.74387	-3.2922	-1.43412	0.0162272	0.222303	0.246616	0.0426718	0.00292341	0.123771
1992-10-15	1992	10	23.3626	-2.94576	-0.240814		9.56678	0.672935	-0.0391867	3.79385	-0.624436	0.17214	0.345388	-0.0460159	0.235895	-0.109054	0.142511	-0.00494768	1.19754	0.0737233	0.55405	-0.00675995	0.0865161	-0.00750621	1.52721	-3.00158	-1.13855	0.00523611	-0.174535	0.0332367	0.0423777	-0.0749092	-0.0459407
1992-11-15	1992	11	22.9958	-3.56976	-0.856857		9.54274	0.728646	-0.124316	3.83146	-0.507164	0.0750554	0.314568	-0.272013	0.00179376	-0.101679	-0.0386549	0.00517987	1.13858	-0.511191	0.211279	-0.00675995	0.0236834	-0.00296813	1.23947	-2.4657	-0.979677	-0.00245953	-0.450049	-0.00116689	0.0398639	-0.0773345	-0.0419683
1992-12-15	1992	12	22.5942	-3.48013	-0.494185	Aquifers	9.51352	-0.445563	0.156989	3.87455	-0.341692	0.0198181	0.297481	-0.51695	-0.10907	-0.0896672	0.275814	-0.00186535	1.09447	-0.507689	0.100463	-0.00671736	-0.0724734	0.00677207	0.863633	-1.70396	-0.548285	0.00510051	-0.0930144	-0.0722856	0.0418163	-0.0746025	-0.0468023
1993-01-15	1993	1	22.2618	-2.9116	1.23979	-0.0890212	9.48477	-0.393371	0.107421	3.91811	-0.13915	0.134428	0.287623	-0.630247	-0.113727	-0.0889447	-0.336774	0.0608024	1.11118	-0.837353	0.370529	-0.00667478	-0.0232299	0.00222968	0.499601	-0.27042	0.621855	0.0150204	-0.2138	0.101666	0.041072	-0.0672503	-0.045516
1993-02-15	1993	2	22.3384	-0.425671	-1.67869	-0.323425	9.48848	-0.273069	-0.0759096	3.97514	0.121046	0.00500952	0.311886	-0.549732	-0.310865	-0.0929638	-0.293661	0.176514	1.22002	-1.12843	-0.704966	-0.00654697	-0.0232802	0.0021522	0.335765	1.75588	-0.47327	0.0380339	0.00350758	-0.200487	0.0686224	-0.0379232	-0.0969343
1993-03-15	1993	3	22.1147	1.77262	-0.415566	-0.471167	9.46669	-0.148666	-0.0867259	4.06494	0.404473	-0.0318535	0.254293	-0.394002	-0.220903	-0.0597565	-0.281057	0.00342431	1.02512	-1.24604	-0.250245	-0.00646174	-0.0233124	0.00209921	0.361758	3.47054	0.194709	-0.0360528	0.0132886	-0.0181958	0.0441306	-0.0226033	-0.00779152
1993-04-15	1993	4	21.7746	3.14079	-0.408641	-0.49266	9.41403	-0.351079	0.0513967	4.14018	0.636059	-0.265799	0.162627	-0.138559	-0.203305	-0.0276435	0.0471379	-0.066854	0.755722	-1.2517	-0.394711	-0.00632229	-0.0726304	0.006534	0.392093	4.35013	0.496129	-0.0814204	-0.0560008	0.00780426	0.0253498	-0.022553	-0.0397287
1993-05-15	1993	5	21.5773	2.52636	-0.840751	-0.382145	9.36809	-0.455358	0.0753937	4.21265	0.800123	-0.267536	0.107324	-0.103382	-4.87583e-05	-0.0182883	0.138744	0.00451692	0.574912	-1.53611	-0.214737	-0.00618292	-0.0396406	0.00295605	0.412374	3.79074	-0.556757	-0.0988497	-0.0387069	0.0890297	0.0252313	-0.0300407	0.0265123
1993-06-15	1993	6	21.4813	1.48845	-0.850317	-0.169235	9.32519	-0.446381	0.0888163	4.29599	0.840198	-0.350907	0.0758096	0.365738	0.0230416	-0.0118013	-0.00936348	-0.0770514	0.420859	-0.837148	0.149738	-0.0060928	-0.0396797	0.002905	0.459942	1.72429	-0.709073	-0.104135	-0.140732	0.032353	0.0255685	0.0315372	-0.0101275
1993-07-15	1993	7	21.3817	1.96699	2.83587	0.0890212	9.25634	-0.123101	0.374912	4.37562	0.175076	0.066371	0.0561185	0.820443	0.561781	-0.00238394	0.0946709	-0.0728347	0.276593	1.79906	1.32622	-0.0060928	0.0639562	-0.00546254	0.507557	-1.46464	-0.126743	-0.107559	0.3819	0.283229	0.0254857	0.219623	0.428364
1993-08-15	1993	8	21.1334	1.74735	0.174354	0.323425	9.18379	0.304389	0.133498	4.43935	-0.768633	0.474273	0.03462	0.925179	0.00909195	0.00194578	0.0168166	0.17663	0.0934499	3.66178	-0.393881	-0.00604341	0.0334991	-0.00223328	0.492196	-3.11782	0.384159	-0.131302	0.546023	-0.452457	0.0253949	0.146102	-0.154824
1993-09-15	1993	9	21.174	-0.169949	-0.498139	0.471167	9.11584	0.56428	-0.0538025	4.50749	-0.737432	0.363333	0.0270583	0.524142	-0.18156	-0.00667771	0.243249	0.0722449	-0.016784	2.21627	-0.471912	-0.00599402	0.0865215	-0.00662631	0.650672	-3.2922	0.0230974	-0.123182	0.222303	-0.158386	0.0256187	0.00292341	-0.084545
1993-10-15	1993	10	21.0438	-2.94576	-0.290261	0.49266	9.03964	0.672935	-0.063316	4.56627	-0.624436	0.269404	0.013013	-0.0460159	-0.0953647	0.00065586	0.142511	-0.00239554	-0.18818	0.0737233	-0.229947	-0.00594463	0.0865161	-0.006649	0.731207	-3.00158	-0.0991786	-0.133045	-0.174535	-0.0376337	0.0201929	-0.0749092	-0.0251781
1993-11-15	1993	11	21.0657	-3.56976	-0.078073	0.382145	8.95511	0.728646	-0.0515827	4.64762	-0.507164	0.258926	0.0132027	-0.272013	-0.0750122	0.00298281	-0.0386549	-0.0216376	-0.285443	-0.511191	-0.213344	-0.00594463	0.0236834	-0.00270203	0.848471	-2.4657	-0.0178694	-0.133121	-0.450049	0.0660735	0.0227871	-0.0773345	-0.020845
1993-12-15	1993	12	21.1965	-3.48013	-0.292333	0.169235	8.8708	-0.445563	-0.0264624	4.71837	-0.341692	0.131561	0.00565836	-0.51695	-0.0535415	-0.00293103	0.275814	0.0244067	-0.35448	-0.507689	-0.181774	-0.00590204	-0.0724734	0.00595675	1.08672	-1.70396	-0.199985	-0.140993	-0.0930144	0.0327196	0.0192911	-0.0746025	-0.0252709
1994-01-15	1994	1	21.2846	-2.9116	-0.762526		8.77835	-0.393371	-0.0567634	4.78746	-0.13915	0.0298489	0.00278167	-0.630247	-0.0868667	0.0080152	-0.336774	0.0157991	-0.461846	-0.837353	-0.25416	-0.00585945	-0.0232299	0.00200701	1.29739	-0.27042	-0.360272	-0.144424	-0.2138	-0.0238137	0.0227591	-0.0672503	-0.0282933
1994-02-15	1994	2	21.3001	-0.425671	-0.152696		8.69732	-0.273069	-0.100181	4.77432	0.121046	0.0235439	0.0328109	-0.549732	-0.12253	-0.00977257	-0.293661	-0.010159	-0.40393	-1.12843	-0.403822	-0.00573193	-0.0232802	0.00192983	1.29393	1.75588	0.470283	-0.0968322	0.00350758	0.031829	0.017959	-0.0379232	-0.0435843
1994-03-15	1994	3	21.5175	1.77262	-1.38102		8.64694	-0.148666	-0.18129	4.68015	0.404473	0.0583209	0.114455	-0.394002	-0.249608	-0.0424982	-0.281057	0.0741688	-0.147725	-1.24604	-1.13415	-0.00564702	-0.0233124	0.00187714	1.24019	3.47054	0.282691	-0.00819389	0.0132886	-0.164416	0.0397701	-0.0226033	-0.0685412
1994-04-15	1994	4	21.7602	3.14079	-0.131914		8.62485	-0.351079	-0.173823	4.59261	0.636059	0.257928	0.205657	-0.138559	-0.24406	-0.0741329	0.0471379	0.00755882	0.118963	-1.2517	-0.925113	-0.00550846	-0.0726304	0.00572016	1.19909	4.35013	1.0963	0.0510789	-0.0560008	-0.125609	0.0476121	-0.022553	-0.0308605
1994-05-15	1994	5	21.7943	2.52636	0.512759		8.59421	-0.455358	-0.16244	4.50707	0.800123	0.28704	0.253435	-0.103382	-0.236692	-0.0807578	0.138744	-0.00397977	0.245379	-1.53611	-0.713643	-0.00536996	-0.0396406	0.0026542	1.1677	3.79074	1.54691	0.0649207	-0.0387069	-0.169198	0.0477277	-0.0300407	-0.0379358
1994-06-15	1994	6	21.7618	1.48845	-0.0736233		8.56031	-0.446381	-0.255686	4.40827	0.840198	0.365907	0.280591	0.365738	-0.21626	-0.0872039	-0.00936348	0.129706	0.37119	-0.837148	-1.08899	-0.00527941	-0.0396797	0.00260272	1.11766	1.72429	1.16122	0.0689495	-0.140732	-0.181908	0.0472846	0.0315372	0.00977217
1994-07-15	1994	7	21.8102	1.96699	2.59283		8.54316	-0.123101	0.115675	4.32178	0.175076	-0.0374447	0.303673	0.820443	0.674577	-0.0941648	0.0946709	-0.194507	0.507907	1.79906	1.7899	-0.00527941	0.0639562	-0.00474571	1.10096	-1.46464	-0.761575	0.0833028	0.3819	0.663469	0.0488258	0.219623	0.347422
1994-08-15	1994	8	21.9539	1.74735	1.96221		8.52829	0.304389	0.184503	4.23916	-0.768633	-0.455638	0.325423	0.925179	0.698021	-0.102575	0.0168166	-0.111557	0.673141	3.66178	2.10089	-0.00523269	0.0334991	-0.00202507	1.13824	-3.11782	-0.906784	0.108815	0.546023	0.371086	0.0485573	0.146102	0.0837472
1994-09-15	1994	9	21.8996	-0.169949	1.68948		8.51549	0.56428	0.281403	4.15206	-0.737432	-0.331657	0.336264	0.524142	0.603657	-0.0997193	0.243249	-0.21433	0.78944	2.21627	1.92213	-0.00518597	0.0865215	-0.00577161	1.04834	-3.2922	-0.867865	0.112692	0.222303	0.317014	0.0502343	0.00292341	-0.0150568
1994-10-15	1994	10	21.86	-2.94576	-0.697347		8.50569	0.672935	0.102964	4.0699	-0.624436	-0.260709	0.344406	-0.0460159	0.146578	-0.105517	0.142511	0.0242794	0.925862	0.0737233	0.173001	-0.00513924	0.0865161	-0.00579247	0.944933	-3.00158	-0.689552	0.12494	-0.174535	-0.129517	0.0549244	-0.0749092	-0.0585219
1994-11-15	1994	11	21.8642	-3.56976	-1.2669		8.51061	0.728646	-0.0138223	3.98223	-0.507164	-0.261289	0.369674	-0.272013	-0.105612	-0.115084	-0.0386549	0.0190759	1.10864	-0.511191	-0.0977002	-0.00513924	0.0236834	-0.00242075	0.815074	-2.4657	-0.584987	0.140006	-0.450049	-0.158708	0.0581278	-0.0773345	-0.0615039
1994-12-15	1994	12	21.7848	-3.48013	-0.299938	Glaciers	8.51657	-0.445563	0.121955	3.90158	-0.341692	-0.0895849	0.395959	-0.51695	-0.16686	-0.113049	0.275814	0.0509932	1.23424	-0.507689	-0.129886	-0.00509664	-0.0724734	0.00515135	0.646389	-1.70396	0.0399556	0.150065	-0.0930144	-0.0860993	0.0580859	-0.0746025	-0.0455712
1995-01-15	1995	1	21.7126	-2.9116	0.533603	-0.10833	8.52381	-0.393371	0.0193067	3.8236	-0.13915	0.00231698	0.412731	-0.630247	-0.235814	-0.113435	-0.336774	0.0363259	1.35426	-0.837353	-0.0874593	-0.00505404	-0.0232299	0.00176225	0.507439	-0.27042	0.87714	0.15445	-0.2138	-0.0165423	0.0547811	-0.0672503	-0.0635365
1995-02-15	1995	2	21.5104	-0.425671	-1.01356	0.274295	8.51057	-0.273069	-0.0669984	3.79309	0.121046	-0.0403879	0.377676	-0.549732	-0.337307	-0.0920899	-0.293661	0.106428	1.26488	-1.12843	-0.677044	-0.00492858	-0.0232802	0.00168712	0.501399	1.75588	0.183909	0.108387	0.00350758	-0.126863	0.0514591	-0.0379232	-0.0569606
1995-03-15	1995	3	21.6401	1.77262	-1.97907	0.583423	8.52038	-0.148666	-0.172399	3.80598	0.404473	-0.0535311	0.400985	-0.394002	-0.438429	-0.100725	-0.281057	0.0628179	1.32421	-1.24604	-0.969022	-0.00484574	-0.0233124	0.00163651	0.502496	3.47054	-0.220435	0.120153	0.0132886	-0.145793	0.0715228	-0.0226033	-0.0440126
1995-04-15	1995	4	21.6225	3.14079	0.0553563	0.736224	8.51991	-0.351079	-0.00980123	3.82249	0.636059	-0.0239803	0.398154	-0.138559	-0.133346	-0.0841502	0.0471379	-0.0972228	1.27792	-1.2517	0.109253	-0.00471001	-0.0726304	0.00492171	0.515317	4.35013	0.221762	0.102695	-0.0560008	0.00357238	0.0749058	-0.022553	-0.0197134
1995-05-15	1995	5	21.6606	2.52636	-0.306303	0.691753	8.52276	-0.455358	-0.019455	3.84136	0.800123	-0.0149949	0.395462	-0.103382	-0.0632973	-0.0802455	0.138744	0.0199319	1.28032	-1.53611	-0.241341	-0.00457435	-0.0396406	0.00236981	0.527125	3.79074	0.163257	0.103239	-0.0387069	-0.0868053	0.0751618	-0.0300407	-0.0658732
1995-06-15	1995	6	21.6795	1.48845	-0.857344	0.461928	8.52261	-0.446381	-0.131073	3.86183	0.840198	-0.0234409	0.391583	0.365738	-0.125986	-0.0755056	-0.00936348	0.113371	1.2692	-0.837148	-0.546739	-0.00448363	-0.0396797	0.00231816	0.53529	1.72429	0.0761874	0.103702	-0.140732	-0.164042	0.0752446	0.0315372	-0.0578457
1995-07-15	1995	7	21.6685	1.96699	0.308673	0.10833	8.53049	-0.123101	-0.0305852	3.87344	0.175076	0.0447773	0.383885	0.820443	0.17371	-0.0746701	0.0946709	0.0421405	1.23921	1.79906	-0.0140577	-0.00448363	0.0639562	-0.00403589	0.543708	-1.46464	-0.276807	0.102974	0.3819	0.091043	0.073968	0.219623	0.282416
1995-08-15	1995	8	21.5838	1.74735	3.88872	-0.274295	8.53582	0.304389	0.294651	3.87412	-0.768633	0.0640662	0.375638	0.925179	0.927506	-0.0708158	0.0168166	-0.246933	1.19646	3.66178	2.28954	-0.00443756	0.0334991	-0.00182613	0.50552	-3.11782	-0.260903	0.0972664	0.546023	0.523822	0.0743021	0.146102	0.298768
1995-09-15	1995	9	21.6073	-0.169949	1.77036	-0.583423	8.54186	0.56428	0.24942	3.87817	-0.737432	0.140387	0.375503	0.524142	0.530453	-0.0722207	0.243249	-0.0429363	1.18946	2.21627	0.966636	-0.00439148	0.0865215	-0.00493732	0.519916	-3.2922	-0.18559	0.104958	0.222303	0.115258	0.0740829	0.00292341	0.00168997
1995-10-15	1995	10	21.8753	-2.94576	-0.255625	-0.736224	8.55724	0.672935	0.0855895	3.89916	-0.624436	0.136533	0.397857	-0.0460159	0.0608176	-0.0718533	0.142511	0.0374719	1.24758	0.0737233	-0.11984	-0.00434541	0.0865161	-0.00495839	0.652283	-3.00158	-0.255206	0.121002	-0.174535	-0.119054	0.0763776	-0.0749092	-0.0769028
1995-11-15	1995	11	22.0501	-3.56976	-1.22661	-0.691753	8.5502	0.728646	-0.0551227	3.91918	-0.507164	0.0473353	0.387895	-0.272013	-0.170376	-0.0544131	-0.0386549	0.0152836	1.19207	-0.511191	-0.314662	-0.00434541	0.0236834	-0.002126	0.877933	-2.4657	-0.549859	0.110065	-0.450049	-0.123218	0.0715537	-0.0773345	-0.0739365
1995-12-15	1995	12	22.2646	-3.48013	-0.911361	-0.461928	8.54019	-0.445563	0.192817	3.94443	-0.341692	0.00684557	0.36605	-0.51695	-0.229337	-0.0548123	0.275814	0.00278287	1.14607	-0.507689	-0.40153	-0.0043028	-0.0724734	0.00435751	1.1545	-1.70396	-0.367141	0.100482	-0.0930144	-0.0452486	0.0720261	-0.0746025	-0.0748308
1996-01-15	1996	1	22.6284	-2.9116	-1.39809		8.54884	-0.393371	0.0582472	3.9735	-0.13915	-0.139374	0.374798	-0.630247	-0.296837	-0.0684648	-0.336774	0.037607	1.20779	-0.837353	-0.454068	-0.00426019	-0.0232299	0.00152128	1.39655	-0.27042	-0.470228	0.115895	-0.2138	-0.0464774	0.0837906	-0.0672503	-0.0885369
1996-02-15	1996	2	22.8983	-0.425671	-2.11962		8.54967	-0.273069	-0.0335919	4.0214	0.121046	-0.220081	0.372716	-0.549732	-0.333971	-0.0700193	-0.293661	0.067499	1.30905	-1.12843	-0.805129	-0.00413458	-0.0232802	0.00144601	1.55802	1.75588	-0.69996	0.0980651	0.00350758	-0.0242398	0.0635228	-0.0379232	-0.0716541
1996-03-15	1996	3	22.8755	1.77262	0.00089375		8.52583	-0.148666	0.00671896	4.07539	0.404473	-0.0711397	0.329471	-0.394002	-0.0986662	-0.0537799	-0.281057	0.0202824	1.26508	-1.24604	-0.212481	-0.00405162	-0.0233124	0.00139527	1.61493	3.47054	0.255534	0.0647123	0.0132886	0.102175	0.0578905	-0.0226033	-0.00284442
1996-04-15	1996	4	22.8398	3.14079	0.93625		8.49582	-0.351079	-0.0701853	4.1101	0.636059	-0.0713283	0.304292	-0.138559	-0.159023	-0.0551923	0.0471379	0.0831009	1.2491	-1.2517	-0.528064	-0.00391606	-0.0726304	0.00412777	1.63627	4.35013	1.80861	0.0531113	-0.0560008	-0.0780872	0.0502437	-0.022553	-0.0529383
1996-05-15	1996	5	22.893	2.52636	1.03534		8.46876	-0.455358	-0.0855764	4.14647	0.800123	-0.0170345	0.296754	-0.103382	-0.226734	-0.0557522	0.138744	-0.00935085	1.26135	-1.53611	-0.774404	-0.00378057	-0.0396406	0.00208734	1.66677	3.79074	2.34242	0.0621679	-0.0387069	-0.160728	0.0502591	-0.0300407	-0.0353009
1996-06-15	1996	6	22.9511	1.48845	2.23682		8.44227	-0.446381	0.0530294	4.1854	0.840198	0.0017692	0.297353	0.365738	0.0732239	-0.053331	-0.00936348	-0.072634	1.26816	-0.837148	0.195024	-0.00368934	-0.0396797	0.00203518	1.70687	1.72429	1.80919	0.0578274	-0.140732	0.0667786	0.0502401	0.0315372	0.108332
1996-07-15	1996	7	22.9347	1.96699	2.28059		8.39906	-0.123101	0.110854	4.21644	0.175076	0.276543	0.294154	0.820443	0.238455	-0.0467022	0.0946709	-0.004482	1.28132	1.79906	1.15896	-0.00368934	0.0639562	-0.0033229	1.6956	-1.46464	0.508933	0.0485078	0.3819	-0.0684447	0.0500325	0.219623	0.063138
1996-08-15	1996	8	22.8286	1.74735	2.37011		8.35503	0.304389	0.189304	4.25545	-0.768633	0.330622	0.287117	0.925179	0.497086	-0.0452998	0.0168166	-0.0775757	1.27702	3.66178	1.68123	-0.00364368	0.0334991	-0.00162445	1.62112	-3.11782	-0.693504	0.0322831	0.546023	0.188572	0.0495603	0.146102	0.255921
1996-09-15	1996	9	22.5946	-0.169949	0.355577		8.30494	0.56428	0.126231	4.28401	-0.737432	0.151147	0.269741	0.524142	0.334061	-0.0414417	0.243249	-0.0906647	1.23045	2.21627	0.73397	-0.00359801	0.0865215	-0.00410408	1.49107	-3.2922	-0.900699	0.0123938	0.222303	0.0686112	0.0470866	0.00292341	-0.0630754
1996-10-15	1996	10	22.1586	-2.94576	0.0990579		8.24678	0.672935	0.0713479	4.29739	-0.624436	0.174764	0.235782	-0.0460159	0.132444	-0.0398255	0.142511	-0.00127398	1.11189	0.0737233	0.162856	-0.00355235	0.0865161	-0.0041256	1.2753	-3.00158	-0.512263	-0.0054911	-0.174535	0.116118	0.0403543	-0.0749092	-0.0406946
1996-11-15	1996	11	21.7399	-3.56976	-0.219344		8.21176	0.728646	-0.0345539	4.29838	-0.507164	0.135297	0.223646	-0.272013	0.00105631	-0.0552823	-0.0386549	0.0452069	1.05457	-0.511191	-0.095494	-0.00355235	0.0236834	-0.00182421	0.967086	-2.4657	-0.157819	0.00186761	-0.450049	-0.0671064	0.0414165	-0.0773345	-0.044027
1996-12-15	1996	12	21.3785	-3.48013	-0.221682	Ground Water	8.18698	-0.445563	0.0274724	4.2911	-0.341692	0.0325871	0.228559	-0.51695	-0.130227	-0.0701396	0.275814	0.0976553	1.04696	-0.507689	-0.144508	-0.00350973	-0.0724734	0.00356444	0.643254	-1.70396	0.00888588	0.0156417	-0.0930144	-0.0722442	0.0395883	-0.0746025	-0.0448838
1997-01-15	1997	1	20.9137	-2.9116	-0.95631	-0.672636	8.15797	-0.393371	-0.079204	4.28027	-0.13915	0.0220288	0.212689	-0.630247	-0.219178	-0.0739013	-0.336774	0.0598724	0.93331	-0.837353	-0.231167	-0.00346712	-0.0232299	0.00127615	0.350771	-0.27042	-0.318231	0.0279435	-0.2138	-0.153222	0.0281246	-0.0672503	-0.0385375
1997-02-15	1997	2	20.3432	-0.425671	-2.37258	-0.668999	8.11579	-0.273069	-0.200787	4.19763	0.121046	-0.0536682	0.182499	-0.549732	-0.352259	-0.0698905	-0.293661	0.113668	0.732545	-1.12843	-0.787431	-0.00334211	-0.0232802	0.00120148	0.133289	1.75588	-0.83584	0.0318255	0.00350758	-0.196672	0.0228439	-0.0379232	-0.06066
1997-03-15	1997	3	19.9182	1.77262	-2.27399	-0.486105	8.07958	-0.148666	-0.245031	4.13403	0.404473	0.0307686	0.149254	-0.394002	-0.325959	-0.07045	-0.281057	0.0563465	0.530959	-1.24604	-0.901069	-0.00325976	-0.0233124	0.00115136	0.062564	3.47054	-0.78126	0.018567	0.0132886	-0.0662984	0.0169545	-0.0226033	-0.042696
1997-04-15	1997	4	19.6926	3.14079	-0.941332	-0.172958	8.04866	-0.351079	-0.0431875	4.07686	0.636059	-0.0261852	0.132764	-0.138559	-0.133134	-0.0614029	0.0471379	-0.0961699	0.443614	-1.2517	-0.410521	-0.00312497	-0.0726304	0.00333668	0.0253767	4.35013	-0.279099	0.00978114	-0.0560008	0.0535475	0.0201056	-0.022553	-0.0100541
1997-05-15	1997	5	19.5183	2.52636	0.0726839	0.186532	8.02027	-0.455358	0.0655467	4.01429	0.800123	0.0277805	0.122787	-0.103382	0.00619876	-0.0728726	0.138744	-0.170518	0.409673	-1.53611	-0.0139609	-0.00299025	-0.0396406	0.00180843	-0.00976965	3.79074	0.132976	0.0168669	-0.0387069	0.0498628	0.0200724	-0.0300407	-0.0270528
1997-06-15	1997	6	19.4137	1.48845	0.197383	0.496041	7.99718	-0.446381	0.149974	3.95797	0.840198	0.0992296	0.128595	0.365738	0.0515377	-0.0862241	-0.00936348	-0.0848815	0.378806	-0.837148	-0.279443	-0.00289844	-0.0396797	0.0017557	-0.0197201	1.72429	0.0259762	0.0396606	-0.140732	0.232566	0.0202886	0.0315372	0.000720634
1997-07-15	1997	7	19.3979	1.96699	-1.02859	0.672636	8.00974	-0.123101	-0.00592695	3.90858	0.175076	-0.407175	0.134144	0.820443	0.0361781	-0.0988299	0.0946709	0.0957754	0.324726	1.79906	-0.293628	-0.00289844	0.0639562	-0.00261369	0.0400422	-1.46464	-0.445294	0.0620142	0.3819	-0.0353671	0.0203723	0.219623	0.0294292
1997-08-15	1997	8	19.4632	1.74735	0.635366	0.668999	8.02162	0.304389	0.0881486	3.85212	-0.768633	-0.0292921	0.139795	0.925179	0.245479	-0.0980399	0.0168166	-0.0315491	0.282293	3.66178	0.256923	-0.00285317	0.0334991	-0.00142682	0.171329	-3.11782	-0.0924154	0.076436	0.546023	-0.0146824	0.0205242	0.146102	0.214285
1997-09-15	1997	9	19.7099	-0.169949	0.533364	0.486105	8.04284	0.56428	0.0172424	3.8118	-0.737432	-0.062685	0.163261	0.524142	0.24265	-0.102046	0.243249	0.0785037	0.295268	2.21627	0.621024	-0.00280789	0.0865215	-0.0032767	0.38353	-3.2922	-0.23941	0.0909031	0.222303	-0.115328	0.0271422	0.00292341	-0.00531765
1997-10-15	1997	10	20.0771	-2.94576	0.0891228	0.172958	8.07012	0.672935	-0.0925722	3.76461	-0.624436	-0.0433398	0.192181	-0.0460159	0.0563282	-0.10602	0.142511	-0.0727158	0.36679	0.0737233	0.50066	-0.00276261	0.0865161	-0.00329869	0.662616	-3.00158	-0.321332	0.101236	-0.174535	0.0944206	0.0283602	-0.0749092	-0.0290991
1997-11-15	1997	11	20.2383	-3.56976	0.0262208	-0.186532	8.08434	0.728646	-0.184232	3.72408	-0.507164	0.033783	0.20607	-0.272013	0.0883286	-0.0947675	-0.0386549	-0.0755259	0.362863	-0.511191	0.225807	-0.00276261	0.0236834	-0.00151226	0.828729	-2.4657	-0.138868	0.0982411	-0.450049	0.110044	0.0315348	-0.0773345	-0.0315513
1997-12-15	1997	12	20.3694	-3.48013	0.59811	-0.496041	8.09018	-0.445563	0.274909	3.68834	-0.341692	0.0426579	0.220183	-0.51695	-0.0552672	-0.0769798	0.275814	-0.0467744	0.385907	-0.507689	-0.13241	-0.00271999	-0.0724734	0.0027747	0.931673	-1.70396	0.437615	0.0969751	-0.0930144	0.114666	0.0358285	-0.0746025	-0.040119
1998-01-15	1998	1	20.439	-2.9116	0.302254		8.07637	-0.393371	0.144978	3.65652	-0.13915	-0.0317127	0.218308	-0.630247	-0.156986	-0.0590507	-0.336774	0.0545025	0.390306	-0.837353	-0.197361	-0.00267736	-0.0232299	0.00102971	1.05342	-0.27042	0.554571	0.0731113	-0.2138	-0.0253285	0.0327499	-0.0672503	-0.0413401
1998-02-15	1998	2	20.5776	-0.425671	0.35304		8.07462	-0.273069	0.0950296	3.66408	0.121046	-0.00394231	0.233866	-0.549732	-0.12203	-0.0654569	-0.293661	0.0611655	0.444885	-1.12843	-0.344069	-0.0025523	-0.0232802	0.000954983	1.11252	1.75588	0.731332	0.0779519	0.00350758	-0.069193	0.0377122	-0.0379232	0.00388702
1998-03-15	1998	3	20.2762	1.77262	1.77473		8.03	-0.148666	0.131943	3.61627	0.404473	-0.017851	0.18867	-0.394002	-0.0183329	-0.040223	-0.281057	-0.0215733	0.320736	-1.24604	0.167418	-0.00246991	-0.0233124	0.000904823	1.11539	3.47054	1.51496	0.0422308	0.0132886	0.0340301	0.00564297	-0.0226033	-0.0167684
1998-04-15	1998	4	19.9196	3.14079	0.766139		7.97533	-0.351079	0.20079	3.57247	0.636059	-0.00809333	0.132415	-0.138559	0.0338744	-0.0299644	0.0471379	0.00742182	0.133886	-1.2517	-0.147916	-0.00233514	-0.0726304	0.00254684	1.11175	4.35013	0.627879	0.0280704	-0.0560008	-0.000679018	-0.00208143	-0.022553	0.0502284
1998-05-15	1998	5	19.5929	2.52636	1.57087		7.92427	-0.455358	0.231623	3.53274	0.800123	0.0804996	0.0998403	-0.103382	0.198501	-0.02295	0.138744	-0.00698834	-0.0553521	-1.53611	0.727588	-0.00220043	-0.0396406	0.00153012	1.11028	3.79074	0.248258	0.00812314	-0.0387069	0.0434156	-0.00187675	-0.0300407	0.0464212
1998-06-15	1998	6	19.222	1.48845	1.22508		7.87174	-0.446381	0.10965	3.48122	0.840198	0.194053	0.0647978	0.365738	0.0928456	-0.0101926	-0.00936348	0.0542361	-0.250104	-0.837148	0.402259	-0.002108	-0.0396797	0.00147676	1.08255	1.72429	0.384614	-0.0138508	-0.140732	-0.000288479	-0.0021019	0.0315372	-0.0138321
1998-07-15	1998	7	18.7037	1.96699	1.32845		7.75852	-0.123101	0.224298	3.42112	0.175076	0.171079	0.0422936	0.820443	0.314714	0.00388775	0.0946709	-0.0838162	-0.422962	1.79906	1.109	-0.002108	0.0639562	-0.00190333	0.948772	-1.46464	-0.644794	-0.0435965	0.3819	0.128331	-0.00218537	0.219623	0.111534
1998-08-15	1998	8	18.2539	1.74735	-1.77164		7.65594	0.304389	-0.0815699	3.36873	-0.768633	-0.119596	0.0370139	0.925179	-0.194082	0.00139288	0.0168166	0.171824	-0.563651	3.66178	-0.386912	-0.00206309	0.0334991	-0.00122829	0.798594	-3.11782	-0.685265	-0.0414725	0.546023	-0.325426	-0.000617151	0.146102	-0.149405
1998-09-15	1998	9	17.7473	-0.169949	-1.7843		7.5545	0.56428	-0.150421	3.30892	-0.737432	-0.0854333	0.027014	0.524142	-0.296166	-0.00157838	0.243249	0.10114	-0.70256	2.21627	-0.623358	-0.00201817	0.0865215	-0.0024491	0.617679	-3.2922	-0.517139	-0.0479948	0.222303	-0.146356	-0.00666605	0.00292341	-0.0642022
1998-10-15	1998	10	17.1748	-2.94576	-0.928859		7.44726	0.672935	-0.0825014	3.26258	-0.624436	-0.0181501	0.0115973	-0.0460159	-0.153985	0.00800592	0.142511	-0.102568	-0.881386	0.0737233	-0.522017	-0.00197326	0.0865161	-0.0024716	0.401417	-3.00158	-0.0778503	-0.0648568	-0.174535	0.0211463	-0.00787931	-0.0749092	0.00959667
1998-11-15	1998	11	16.6713	-3.56976	-0.857713		7.31473	0.728646	-0.0449909	3.2236	-0.507164	-0.083931	-0.0164396	-0.272013	-0.109673	0.0226523	-0.0386549	-0.039857	-1.06751	-0.511191	-0.680835	-0.00197326	0.0236834	-0.00119244	0.29222	-2.4657	0.064942	-0.0827137	-0.450049	0.0273109	-0.0132746	-0.0773345	0.0105562
1998-12-15	1998	12	16.1465	-3.48013	-1.39765	Irr Runoff Storage	7.16413	-0.445563	-0.157688	3.17797	-0.341692	-0.168221	-0.056438	-0.51695	-0.0486969	0.0319049	0.275814	0.0133046	-1.27573	-0.507689	-0.545064	-0.00193078	-0.0724734	0.00198549	0.217081	-1.70396	-0.453162	-0.0923618	-0.0930144	-0.0529448	-0.0181815	-0.0746025	0.0128895
1999-01-15	1999	1	15.6712	-2.9116	-0.328299	-0.134035	7.02288	-0.393371	-0.0324918	3.12575	-0.13915	-0.129603	-0.0836573	-0.630247	0.081623	0.027356	-0.336774	-0.0618426	-1.43172	-0.837353	-0.0636165	-0.00188815	-0.0232299	0.000779469	0.134254	-0.27042	-0.328411	-0.1038	-0.2138	0.177071	-0.0179717	-0.0672503	0.0282001
1999-02-15	1999	2	15.2003	-0.425671	-0.348431	-0.17388	6.86411	-0.273069	0.0882547	3.08991	0.121046	-0.147479	-0.127095	-0.549732	0.118932	0.0423891	-0.293661	-0.0823356	-1.61492	-1.12843	0.0488365	-0.00176293	-0.0232802	0.00070459	0.111124	1.75588	-0.438252	-0.133725	0.00350758	0.0642155	-0.0297542	-0.0379232	-0.00123337
1999-03-15	1999	3	15.0341	1.77262	0.146617	-0.167134	6.72442	-0.148666	0.15066	3.08735	0.404473	-0.0449887	-0.131111	-0.394002	0.116447	0.0307681	-0.281057	0.0224472	-1.64696	-1.24604	-0.010805	-0.00168042	-0.0233124	0.000654298	0.106675	3.47054	-0.0714768	-0.108432	0.0132886	-0.0176509	-0.0269564	-0.0226033	0.00127189
1999-04-15	1999	4	14.7902	3.14079	-0.146167	-0.115605	6.57525	-0.351079	0.0105438	3.07258	0.636059	0.0240518	-0.13711	-0.138559	-0.0330426	0.0407178	0.0471379	0.112496	-1.72763	-1.2517	-0.519914	-0.00154764	-0.0726304	0.00175935	0.104345	4.35013	0.324928	-0.109286	-0.0560008	-0.0776052	-0.0271506	-0.022553	0.010554
1999-05-15	1999	5	14.5781	2.52636	0.287405	-0.0330997	6.42941	-0.455358	-0.0806529	3.04991	0.800123	0.0157744	-0.138487	-0.103382	-0.0431523	0.0539672	0.138744	0.0271261	-1.74928	-1.53611	-0.0771451	-0.00141495	-0.0396406	0.00125432	0.0754565	3.79074	0.381409	-0.113803	-0.0387069	0.0495642	-0.0276401	-0.0300407	0.013302
1999-06-15	1999	6	14.4357	1.48845	0.308499	0.0582747	6.28852	-0.446381	-0.00220744	3.04168	0.840198	0.00688343	-0.13327	0.365738	-0.0357183	0.0599479	-0.00936348	-0.0704914	-1.74332	-0.837148	0.0236969	-0.00132401	-0.0396797	0.00120438	0.0681101	1.72429	0.405138	-0.117475	-0.140732	-0.0339188	-0.0272228	0.0315372	0.0138066
1999-07-15	1999	7	14.3262	1.96699	0.0547296	0.134035	6.14511	-0.123101	-0.0675725	3.0316	0.175076	0.130542	-0.129886	0.820443	-0.0343549	0.0635775	0.0946709	0.0368905	-1.72831	1.79906	0.215853	-0.00132401	0.0639562	-0.00118471	0.0880253	-1.46464	-0.0616123	-0.115337	0.3819	-0.159029	-0.0272221	0.219623	-0.00481914
1999-08-15	1999	8	14.1324	1.74735	0.35554	0.17388	6.00064	0.304389	-0.102546	3.02436	-0.768633	0.194097	-0.134009	0.925179	-0.0712505	0.0666604	0.0168166	-0.0328953	-1.74481	3.66178	0.409868	-0.00127944	0.0334991	-0.00102174	0.0769764	-3.11782	-0.0170329	-0.127818	0.546023	0.0644276	-0.0283047	0.146102	-0.0881442
1999-09-15	1999	9	13.8946	-0.169949	-0.858725	0.167134	5.85198	0.56428	-0.237946	3.00873	-0.737432	0.0375347	-0.147441	0.524142	-0.193706	0.0666261	0.243249	0.152333	-1.78214	2.21627	-0.51187	-0.00123487	0.0865215	-0.00163916	0.0574019	-3.2922	0.015175	-0.130406	0.222303	-0.0741911	-0.0289289	0.00292341	-0.0442697
1999-10-15	1999	10	13.4717	-2.94576	0.229854	0.115605	5.69427	0.672935	-0.0795106	2.97754	-0.624436	-0.00514703	-0.176057	-0.0460159	0.0171522	0.0673152	0.142511	-0.00288487	-1.8663	0.0737233	0.203089	-0.00119029	0.0865161	-0.00166221	-0.0558423	-3.00158	0.032745	-0.138078	-0.174535	0.0401706	-0.0300054	-0.0749092	0.0258487
1999-11-15	1999	11	12.9854	-3.56976	1.11864	0.0330997	5.52434	0.728646	0.0547202	2.92807	-0.507164	0.11278	-0.194182	-0.272013	0.130673	0.0683393	-0.0386549	-0.0137756	-1.90341	-0.511191	0.226632	-0.00119029	0.0236834	-0.000884152	-0.266616	-2.4657	0.535621	-0.138776	-0.450049	0.0393029	-0.0311828	-0.0773345	0.0334725
1999-12-15	1999	12	12.4345	-3.48013	1.00117	-0.0582747	5.36148	-0.445563	-0.0759822	2.87199	-0.341692	0.0167892	-0.203282	-0.51695	0.138758	0.0734329	0.275814	0.0153314	-1.93615	-0.507689	0.295394	-0.00114749	-0.0724734	0.0012022	-0.569258	-1.70396	0.57216	-0.132143	-0.0930144	0.0124915	-0.0303837	-0.0746025	0.0250994
2000-01-15	2000	1	11.9464	-2.9116	1.07065		5.19571	-0.393371	0.0610344	2.81321	-0.13915	0.0961102	-0.204373	-0.630247	0.152855	0.0838002	-0.336774	-0.0812923	-1.93377	-0.837353	0.240441	-0.00110485	-0.0232299	0.000531039	-0.849661	-0.27042	0.522918	-0.124962	-0.2138	0.0484628	-0.0324113	-0.0672503	0.0296496
2000-02-15	2000	2	11.4981	-0.425671	0.499912		5.04198	-0.273069	0.126442	2.70568	0.121046	0.0491913	-0.228824	-0.549732	0.059474	0.0737928	-0.293661	-0.114151	-1.96149	-1.12843	-0.0525701	-0.000980993	-0.0232802	0.000457521	-0.975667	1.75588	0.413644	-0.11001	0.00350758	0.00945052	-0.046396	-0.0379232	0.00791775
2000-03-15	2000	3	11.047	1.77262	-0.941605		4.88453	-0.148666	0.0979665	2.60719	0.404473	0.0608717	-0.265713	-0.394002	-0.0923428	0.0796632	-0.281057	-0.0181787	-2.07863	-1.24604	-0.588982	-0.000899858	-0.0233124	0.000408611	-1.00545	3.47054	-0.318281	-0.121433	0.0132886	-0.0967195	-0.0521899	-0.0226033	0.013587
2000-04-15	2000	4	10.7063	3.14079	-1.89747		4.73715	-0.351079	-0.190425	2.5221	0.636059	-0.0190924	-0.290529	-0.138559	-0.0971197	0.0770334	0.0471379	0.0884701	-2.13663	-1.2517	-0.556272	-0.000772534	-0.0726304	0.00098424	-1.02414	4.35013	-1.07586	-0.12601	-0.0560008	-0.0692521	-0.0518698	-0.022553	0.0211447
2000-05-15	2000	5	10.3855	2.52636	-2.13035		4.59108	-0.455358	-0.19666	2.4404	0.800123	-0.04772	-0.305243	-0.103382	0.0144099	0.0777765	0.138744	0.0644396	-2.19894	-1.53611	-0.0203969	-0.000645283	-0.0396406	0.000998283	-1.03292	3.79074	-2.14192	-0.134248	-0.0387069	0.149606	-0.0517007	-0.0300407	0.046951
2000-06-15	2000	6	10.0201	1.48845	-1.13312		4.44427	-0.446381	-0.147207	2.35432	0.840198	-0.0111067	-0.319202	0.365738	0.137113	0.078459	-0.00936348	0.0354055	-2.26943	-0.837148	0.578477	-0.000557798	-0.0396797	0.000949872	-1.07065	1.72429	-1.82093	-0.14511	-0.140732	0.0798819	-0.0519832	0.0315372	0.0142366
2000-07-15	2000	7	9.72666	1.96699	-0.726051		4.29737	-0.123101	-0.0645614	2.27684	0.175076	-0.405103	-0.325537	0.820443	-0.132111	0.0779607	0.0946709	-0.0975815	-2.32321	1.79906	0.478078	-0.000557798	0.0639562	-0.000464655	-1.07943	-1.46464	-0.406241	-0.144961	0.3819	0.0500189	-0.0517955	0.219623	-0.148063
2000-08-15	2000	8	9.38006	1.74735	-0.304429		4.14759	0.304389	-0.138902	2.19436	-0.768633	-0.15769	-0.334517	0.925179	-0.313413	0.0803669	0.0168166	0.0238428	-2.3877	3.66178	-0.352963	-0.00066063	0.0334991	-0.000666929	-1.10937	-3.11782	0.811903	-0.157456	0.546023	-0.0430094	-0.052537	0.146102	-0.133438
2000-09-15	2000	9	8.90788	-0.169949	0.0392092		3.98371	0.56428	-0.138234	2.11325	-0.737432	-0.0880985	-0.346588	0.524142	-0.292348	0.0935971	0.243249	0.0938047	-2.47244	2.21627	-0.517559	-0.000763462	0.0865215	-0.000582674	-1.22819	-3.2922	1.07646	-0.181959	0.222303	-0.07756	-0.0527102	0.00292341	-0.0166472
2000-10-15	2000	10	8.44992	-2.94576	1.40222		3.81046	0.672935	0.0513691	2.02683	-0.624436	-0.0347796	-0.354892	-0.0460159	0.0194151	0.0978955	0.142511	-0.0245486	-2.52166	0.0737233	0.110705	-0.000866293	0.0865161	-0.000459204	-1.36023	-3.00158	1.23176	-0.193874	-0.174535	-0.0028958	-0.0537134	-0.0749092	0.0515864
2000-11-15	2000	11	8.09798	-3.56976	1.62045		3.65537	0.728646	0.161979	1.94401	-0.507164	0.0637894	-0.359834	-0.272013	0.128819	0.079974	-0.0386549	-0.01722	-2.52643	-0.511191	0.0037718	-0.000866293	0.0236834	-0.000158332	-1.45113	-2.4657	1.26739	-0.188319	-0.450049	-0.0414953	-0.0547787	-0.0773345	0.0536786
2000-12-15	2000	12	7.77851	-3.48013	2.13633	Reservoirs+	3.49318	-0.445563	0.0296289	1.86051	-0.341692	0.0985153	-0.369254	-0.51695	0.228705	0.0693155	0.275814	0.0134688	-2.54481	-0.507689	0.258706	-0.000888478	-0.0724734	0.000943188	-1.48218	-1.70396	1.37983	-0.190305	-0.0930144	0.0724434	-0.0570661	-0.0746025	0.0540332
2001-01-15	2001	1	7.46237	-2.9116	1.39553	-1.28637	3.33676	-0.393371	0.122619	1.76804	-0.13915	0.1515	-0.378256	-0.630247	0.218988	0.0536211	-0.336774	-0.0222389	-2.54781	-0.837353	0.0806495	-0.000910608	-0.0232299	-0.000897182	-1.54412	-0.27042	0.858038	-0.168375	-0.2138	-0.0580646	-0.056585	-0.0672503	0.0449262
2001-02-15	2001	2	7.20476	-0.425671	-0.872895	-1.76164	3.19679	-0.273069	0.00508408	1.65615	0.121046	0.125424	-0.36853	-0.549732	0.0543217	0.0373659	-0.293661	0.0810393	-2.5337	-1.12843	-0.497308	-0.00167225	-0.0232802	-8.52054e-05	-1.58403	1.75588	-0.403885	-0.145787	0.00350758	-0.24881	-0.0518259	-0.0379232	0.0112688
2001-03-15	2001	3	6.88685	1.77262	-2.27704	-1.76488	3.06902	-0.148666	-0.165624	1.52303	0.404473	0.107986	-0.372277	-0.394002	-0.0854322	0.0248263	-0.281057	0.0882392	-2.55137	-1.24604	-0.70688	-0.00241006	-0.0233124	0.000684833	-1.60302	3.47054	-1.30514	-0.149796	0.0132886	-0.211335	-0.0511676	-0.0226033	0.000525723
2001-04-15	2001	4	6.57342	3.14079	-1.98775	-1.29522	2.93367	-0.351079	-0.248021	1.394	0.636059	0.115233	-0.379213	-0.138559	-0.0677376	0.0187125	0.0471379	-0.0682676	-2.55903	-1.2517	-0.19106	-0.00330586	-0.0726304	0.00351756	-1.61776	4.35013	-1.57306	-0.161917	-0.0560008	0.0333239	-0.051759	-0.022553	0.00825075
2001-05-15	2001	5	6.22241	2.52636	-1.80097	-0.478505	2.7964	-0.455358	-0.348272	1.26493	0.800123	0.125767	-0.390972	-0.103382	-0.0128921	0.0151952	0.138744	-0.000881328	-2.59068	-1.53611	0.150747	-0.00420164	-0.0396406	0.00428842	-1.64471	3.79074	-1.9027	-0.171665	-0.0387069	0.163185	-0.0518914	-0.0300407	0.019693
2001-06-15	2001	6	5.91335	1.48845	-0.819998	0.466422	2.66135	-0.446381	-0.241241	1.13409	0.840198	0.0994687	-0.399758	0.365738	0.109643	0.0108785	-0.00936348	-0.0853468	-2.60862	-0.837148	0.881688	-0.00453424	-0.0396797	0.00466075	-1.66723	1.72429	-1.96763	-0.161136	-0.140732	0.359067	-0.0517214	0.0315372	0.0197481
2001-07-15	2001	7	5.55963	1.96699	0.349616	1.28637	2.53102	-0.123101	0.0221085	1.00603	0.175076	-0.477066	-0.406249	0.820443	0.0653108	0.00510585	0.0946709	-0.219788	-2.64025	1.79906	0.964387	-0.00453424	0.0639562	-0.00562788	-1.71319	-1.46464	-0.25143	-0.166528	0.3819	0.342643	-0.0517917	0.219623	-0.0909571
2001-08-15	2001	8	5.20511	1.74735	0.0556237	1.76164	2.4001	0.304389	0.0753922	0.869166	-0.768633	-0.429881	-0.410109	0.925179	-0.282781	0.0101187	0.0168166	-0.0563852	-2.68039	3.66178	-0.272253	-0.00475139	0.0334991	-0.00542993	-1.75943	-3.11782	1.23406	-0.167928	0.546023	-0.0806537	-0.0516737	0.146102	-0.126402
2001-09-15	2001	9	4.96879	-0.169949	0.217099	1.76488	2.27339	0.56428	-0.0521749	0.737158	-0.737432	-0.260378	-0.407837	0.524142	-0.314332	0.00348129	0.243249	0.110555	-2.68266	2.21627	-0.399222	-0.00496855	0.0865215	-0.00712715	-1.74038	-3.2922	1.41182	-0.158648	0.222303	-0.246322	-0.0507613	0.00292341	-0.0256933
2001-10-15	2001	10	4.88464	-2.94576	0.755395	1.29522	2.15834	0.672935	0.0562722	0.610744	-0.624436	-0.167493	-0.392078	-0.0460159	-0.0845086	-0.00388832	0.142511	0.0350285	-2.63626	0.0737233	-0.154602	-0.0051857	0.0865161	-0.00688919	-1.65407	-3.00158	1.2022	-0.143049	-0.174535	-0.170686	-0.0499278	-0.0749092	0.0462124
2001-11-15	2001	11	4.76385	-3.56976	1.24584	0.478505	2.03293	0.728646	0.16381	0.497424	-0.507164	-0.0597204	-0.382271	-0.272013	0.0458206	0.0103566	-0.0386549	0.000595905	-2.62825	-0.511191	-0.109601	-0.0051857	0.0236834	0.000169908	-1.56586	-2.4657	1.11192	-0.145839	-0.450049	0.0423727	-0.0494693	-0.0773345	0.0504093
2001-12-15	2001	12	4.66738	-3.48013	1.00282	-0.466422	1.89973	-0.445563	0.0591089	0.387876	-0.341692	0.03438	-0.380522	-0.51695	0.162078	0.0203486	0.275814	-0.00683567	-2.62975	-0.507689	-0.035966	-0.00548572	-0.0724734	0.00554043	-1.41908	-1.70396	0.765127	-0.155822	-0.0930144	-0.0267527	-0.0499233	-0.0746025	0.0460466
2002-01-15	2002	1	4.53271	-2.9116	0.0710508		1.76989	-0.393371	0.118448	0.290317	-0.13915	-0.0131071	-0.383414	-0.630247	0.177832	0.0216292	-0.336774	0.069907	-2.66914	-0.837353	-0.27972	-0.00578578	-0.0232299	0.00137213	-1.25447	-0.27042	0.0135772	-0.186747	-0.2138	-0.0564836	-0.0495774	-0.0672503	0.0393347
2002-02-15	2002	2	4.23325	-0.425671	-0.737271		1.59728	-0.273069	0.0840839	0.269735	0.121046	-0.0722712	-0.407083	-0.549732	0.120133	0.0584034	-0.293661	-0.0196469	-2.78834	-1.12843	-0.269857	-0.00575488	-0.0232802	0.00139157	-1.18282	1.75588	-0.576531	-0.253639	0.00350758	-0.0296053	-0.0545435	-0.0379232	0.0249347
2002-03-15	2002	3	3.91554	1.77262	-0.315535		1.40864	-0.148666	0.114141	0.236138	0.404473	-0.122089	-0.421716	-0.394002	0.153119	0.0848731	-0.281057	-0.060243	-2.88891	-1.24604	0.18746	-0.0054231	-0.0233124	0.00109201	-1.17446	3.47054	-0.698024	-0.271856	0.0132886	0.0979115	-0.0517571	-0.0226033	0.0111173
2002-04-15	2002	4	3.80848	3.14079	-0.67227		1.24189	-0.351079	-0.0611318	0.205961	0.636059	-0.0565603	-0.408768	-0.138559	0.0794972	0.0757561	0.0471379	0.0456279	-2.83226	-1.2517	0.17827	-0.00523485	-0.0726304	0.00544655	-1.17288	4.35013	-0.959367	-0.245767	-0.0560008	0.0836988	-0.0502397	-0.022553	0.0122334
2002-05-15	2002	5	3.70607	2.52636	-0.442306		1.07342	-0.455358	-0.223679	0.172384	0.800123	-0.0962582	-0.398435	-0.103382	0.0155644	0.0732282	0.138744	0.0609892	-2.75908	-1.53611	0.30113	-0.0050466	-0.0396406	0.00153322	-1.16795	3.79074	-0.618117	-0.232225	-0.0387069	0.103948	-0.0502398	-0.0300407	0.0125933
2002-06-15	2002	6	3.5688	1.48845	-0.0914868		0.906953	-0.446381	-0.0449524	0.133698	0.840198	-0.0708525	-0.389646	0.365738	0.0648315	0.0711712	-0.00936348	-0.130272	-2.6791	-0.837148	0.479461	-0.00520188	-0.0396797	0.00172757	-1.18298	1.72429	-0.476606	-0.23565	-0.140732	0.0624757	-0.0504518	0.0315372	0.0226294
2002-07-15	2002	7	3.43888	1.96699	-1.12313		0.724844	-0.123101	-0.243008	0.0960749	0.175076	0.185908	-0.382796	0.820443	-0.242173	0.0760291	0.0946709	0.150579	-2.59415	1.79906	-0.512018	-0.00520188	0.0639562	-0.00458943	-1.20278	-1.46464	0.0979944	-0.222715	0.3819	-0.403875	-0.0504046	0.219623	-0.151937
2002-08-15	2002	8	3.28122	1.74735	-1.83298		0.547639	0.304389	-0.335822	0.0636805	-0.768633	-0.0275628	-0.37692	0.925179	-0.491571	0.0708876	0.0168166	0.200482	-2.50882	3.66178	-1.65068	-0.00490303	0.0334991	-0.00129687	-1.24237	-3.11782	0.81729	-0.217472	0.546023	-0.249702	-0.0504887	0.146102	-0.0941501
2002-09-15	2002	9	3.26022	-0.169949	0.640862		0.392081	0.56428	-0.171844	0.048325	-0.737432	0.0663331	-0.35597	0.524142	-0.210823	0.0632215	0.243249	-0.0585889	-2.39394	2.21627	-0.00813497	-0.00460418	0.0865215	-0.00523249	-1.26063	-3.2922	0.951097	-0.187834	0.222303	0.0959251	-0.0403965	0.00292341	-0.0178498
2002-10-15	2002	10	3.38257	-2.94576	1.02862		0.258597	0.672935	-0.0657167	0.0405405	-0.624436	-0.00021335	-0.324999	-0.0460159	-0.0275848	0.0568928	0.142511	-0.0560878	-2.24791	0.0737233	0.335196	-0.00430533	0.0865161	-0.00551058	-1.19662	-3.00158	0.803939	-0.163647	-0.174535	0.0124179	-0.0359579	-0.0749092	0.0322408
2002-11-15	2002	11	3.50949	-3.56976	0.852867		0.140575	0.728646	0.0586061	0.036001	-0.507164	-0.0625305	-0.296715	-0.272013	0.0657312	0.0520566	-0.0386549	-0.0657887	-2.11758	-0.511191	0.339426	-0.00430533	0.0236834	-0.00257387	-1.1174	-2.4657	0.483089	-0.150435	-0.450049	0.00586426	-0.0326882	-0.0773345	0.0310843
2002-12-15	2002	12	3.69768	-3.48013	0.413578	Rice Paddy	0.0374665	-0.445563	-0.26393	0.0408965	-0.341692	-0.0701172	-0.271419	-0.51695	0.135171	0.043165	0.275814	0.0286432	-2.00127	-0.507689	0.354958	-0.00408242	-0.0724734	0.00413713	-0.965941	-1.70396	0.0743168	-0.149447	-0.0930144	0.122099	-0.0316672	-0.0746025	0.0283568
2003-01-15	2003	1	3.8522	-2.9116	-1.14046	-0.0313356	-0.0769745	-0.393371	-0.161154	0.044607	-0.13915	-0.15613	-0.257946	-0.630247	0.122882	0.0509371	-0.336774	-0.0210993	-1.91973	-0.837353	-0.00516676	-0.00385951	-0.0232299	0.00303208	-0.804331	-0.27042	-0.911652	-0.148903	-0.2138	-0.0314157	-0.0315658	-0.0672503	0.0203137
2003-02-15	2003	2	4.08532	-0.425671	-0.841268	-0.0538956	-0.156402	-0.273069	-0.0289328	0.0197173	0.121046	-0.0065185	-0.217802	-0.549732	0.182247	0.0290371	-0.293661	-0.0822732	-1.72733	-1.12843	0.047696	-0.0029108	-0.0232802	0.00213371	-0.753325	1.75588	-1.22516	-0.0886846	0.00350758	0.161099	-0.0169478	-0.0379232	0.108446
2003-03-15	2003	3	4.29836	1.77262	0.769866	-0.0620144	-0.216419	-0.148666	0.137395	0.0165257	0.404473	0.00410897	-0.173177	-0.394002	0.27623	0.00376532	-0.281057	-0.0550791	-1.50797	-1.24604	0.558935	-0.00218091	-0.0233124	0.00143604	-0.749076	3.47054	-0.355273	-0.0567176	0.0132886	0.17301	-0.0163479	-0.0226033	0.0289713
2003-04-15	2003	4	4.32016	3.14079	0.339088	-0.0535164	-0.285654	-0.351079	0.0501556	0.0069559	0.636059	0.0879709	-0.15722	-0.138559	0.167358	0.00306208	0.0471379	0.0602876	-1.4329	-1.2517	0.342855	-0.00111223	-0.0726304	0.00132393	-0.747061	4.35013	-0.434532	-0.0497683	-0.0560008	0.0462535	-0.0161062	-0.022553	0.0173368
2003-05-15	2003	5	4.37778	2.52636	1.14422	-0.0306788	-0.356332	-0.455358	-0.0312347	-0.00183062	0.800123	0.136703	-0.143911	-0.103382	0.0645927	0.00118203	0.138744	0.0263355	-1.3302	-1.53611	0.267935	-4.35443e-05	-0.0396406	-0.000794966	-0.741864	3.79074	0.773334	-0.0331482	-0.0387069	-0.0832806	-0.0160431	-0.0300407	-0.00935232
2003-06-15	2003	6	4.45075	1.48845	0.880801	0.00037921	-0.429737	-0.446381	-0.0815531	-0.00494595	0.840198	0.112317	-0.134718	0.365738	-0.0284157	0.00277448	-0.00936348	0.0313895	-1.22732	-0.837148	0.0061823	0.000554547	-0.0396797	-0.00135398	-0.722565	1.72429	1.00231	-0.017322	-0.140732	-0.149328	-0.0159511	0.0315372	-0.0106538
2003-07-15	2003	7	4.53312	1.96699	0.580092	0.0313356	-0.475514	-0.123101	0.00422523	-0.00907345	0.175076	-0.00761886	-0.129206	0.820443	-0.0140333	-0.00549707	0.0946709	-0.0306941	-1.12528	1.79906	0.327917	0.000554547	0.0639562	0.00103873	-0.690386	-1.46464	0.19767	-0.0165494	0.3819	0.112586	-0.0159138	0.219623	-0.0110113
2003-08-15	2003	8	4.73409	1.74735	-0.729352	0.0538956	-0.520558	0.304389	0.0121598	-0.0147624	-0.768633	0.0125805	-0.118658	0.925179	-0.214341	-0.00806931	0.0168166	-0.0238221	-0.996411	3.66178	-0.530744	0.000629768	0.0334991	0.00192898	-0.592265	-3.11782	0.218169	-0.00137575	0.546023	-0.0821943	-0.0144359	0.146102	-0.123004
2003-09-15	2003	9	4.86194	-0.169949	-0.6993	0.0620144	-0.571013	0.56428	-0.039561	-0.0399038	-0.737432	0.0397243	-0.118609	0.524142	-0.256699	-0.00157649	0.243249	-0.00222985	-0.875724	2.21627	-0.625522	0.00070499	0.0865215	0.00228253	-0.49742	-3.2922	0.212056	-0.00965975	0.222303	0.00114282	-0.0248527	0.00292341	-0.0304934
2003-10-15	2003	10	4.58882	-2.94576	0.513859	0.0535164	-0.655506	0.672935	0.000241964	-0.0768784	-0.624436	0.0117673	-0.14619	-0.0460159	-0.0466888	0.0201631	0.142511	-0.0419186	-0.87606	0.0737233	0.195737	0.000780212	0.0865161	0.00222809	-0.607555	-3.00158	0.277232	-0.0402705	-0.174535	0.0884821	-0.0296411	-0.0749092	0.0266811
2003-11-15	2003	11	4.20563	-3.56976	1.03238	0.0306788	-0.751209	0.728646	0.0695314	-0.118258	-0.507164	0.0543442	-0.183152	-0.272013	0.0624885	0.0322754	-0.0386549	-0.0268981	-0.909354	-0.511191	0.365781	0.000780212	0.0236834	-0.000482317	-0.779046	-2.4657	0.376322	-0.0539144	-0.450049	0.0992594	-0.0324652	-0.0773345	0.0319655
2003-12-15	2003	12	3.83126	-3.48013	1.26841	-0.00037921	-0.835764	-0.445563	0.0599838	-0.168731	-0.341692	0.0899805	-0.207173	-0.51695	0.13707	0.0325905	0.275814	-0.060041	-0.906807	-0.507689	0.484887	0.000799099	-0.0724734	-0.00074439	-0.998055	-1.70396	0.492575	-0.0524361	-0.0930144	0.0343588	-0.0331415	-0.0746025	0.0302784
2004-01-15	2004	1	3.4903	-2.9116	1.63305		-0.9134	-0.393371	0.134745	-0.217463	-0.13915	0.0376716	-0.226052	-0.630247	0.21756	0.0275305	-0.336774	-0.0285595	-0.914813	-0.837353	0.536398	0.000817987	-0.0232299	-0.000742757	-1.17795	-0.27042	0.639426	-0.0519411	-0.2138	0.0537058	-0.036414	-0.0672503	0.0428972
2004-02-15	2004	2	3.05108	-0.425671	1.72718		-1.04572	-0.273069	0.254921	-0.233301	0.121046	-0.0551966	-0.272935	-0.549732	0.237969	0.0485556	-0.293661	-0.0238779	-1.07181	-1.12843	0.840425	0.00102451	-0.0232802	-0.00089894	-1.2253	1.75588	0.384948	-0.0981728	0.00350758	0.0711797	-0.0512338	-0.0379232	0.0177295
2004-03-15	2004	3	2.68164	1.77262	-0.890833		-1.18757	-0.148666	0.0946299	-0.224294	0.404473	-0.198767	-0.32031	-0.394002	0.0923974	0.0562078	-0.281057	0.153354	-1.24929	-1.24604	0.296228	0.00124277	-0.0233124	-0.00108497	-1.21406	3.47054	-1.21191	-0.125943	0.0132886	-0.125094	-0.0543174	-0.0226033	0.00948034
2004-04-15	2004	4	2.32793	3.14079	-2.267		-1.34817	-0.351079	-0.0357615	-0.221784	0.636059	-0.179841	-0.357359	-0.138559	-0.0760537	0.0822289	0.0471379	0.126468	-1.39775	-1.2517	-0.0918254	0.00148028	-0.0726304	-0.00126857	-1.20373	4.35013	-2.03575	-0.170784	-0.0560008	0.00354238	-0.0561799	-0.022553	0.0235219
2004-05-15	2004	5	2.11137	2.52636	-1.08177		-1.50011	-0.455358	0.0978953	-0.208915	0.800123	-0.261895	-0.375398	-0.103382	0.00782821	0.0861797	0.138744	-0.0548812	-1.48707	-1.53611	0.45537	0.00171779	-0.0396406	-0.00232965	-1.17397	3.79074	-1.42268	-0.176009	-0.0387069	0.0773197	-0.0550317	-0.0300407	0.0215198
2004-06-15	2004	6	1.89195	1.48845	-0.651911		-1.65018	-0.446381	0.207245	-0.199259	0.840198	-0.278148	-0.382259	0.365738	-0.00741732	0.0862714	-0.00936348	-0.112828	-1.57663	-0.837148	0.259421	0.00191606	-0.0396797	-0.00248885	-1.14374	1.72429	-0.735218	-0.189032	-0.140732	0.0283217	-0.0551086	0.0315372	-0.0107654
2004-07-15	2004	7	1.67374	1.96699	-1.83121		-1.82722	-0.123101	-0.23196	-0.184099	0.175076	-0.0226564	-0.387281	0.820443	-0.318562	0.0914974	0.0946709	0.124613	-1.66792	1.79906	-1.01347	0.00191606	0.0639562	0.00215548	-1.11151	-1.46464	0.0506187	-0.186618	0.3819	-0.272126	-0.0549807	0.219623	-0.149783
2004-08-15	2004	8	1.54636	1.74735	-1.97486		-1.99629	0.304389	-0.21426	-0.160141	-0.768633	0.266052	-0.385043	0.925179	-0.516458	0.0858437	0.0168166	-0.0259091	-1.7376	3.66178	-1.91928	0.00226593	0.0334991	0.00291192	-1.03467	-3.11782	0.79544	-0.172605	0.546023	-0.24421	-0.0553743	0.146102	-0.119069
2004-09-15	2004	9	1.6847	-0.169949	-1.76658		-2.14076	0.56428	-0.397064	-0.118853	-0.737432	0.148794	-0.361052	0.524142	-0.458835	0.069355	0.243249	0.239092	-1.74667	2.21627	-1.53604	0.0026158	0.0865215	0.00322187	-0.834804	-3.2922	0.673324	-0.136355	0.222303	-0.410245	-0.0487624	0.00292341	-0.028933
2004-10-15	2004	10	2.09247	-2.94576	0.411464		-2.2401	0.672935	-0.238406	-0.0705257	-0.624436	0.159834	-0.308262	-0.0460159	-0.101086	0.0408358	0.142511	-0.0151826	-1.65491	0.0737233	-0.0973307	0.00296567	0.0865161	0.00289273	-0.55453	-3.00158	0.581382	-0.0819801	-0.174535	0.067489	-0.0410101	-0.0749092	0.0518279
2004-11-15	2004	11	2.53219	-3.56976	0.0727721		-2.32081	0.728646	-0.161649	-0.0215958	-0.507164	0.0735575	-0.258699	-0.272013	0.0557046	0.0235289	-0.0386549	-0.0170509	-1.56191	-0.511191	-0.0562978	0.00296567	0.0236834	-0.00028851	-0.223923	-2.4657	0.183925	-0.066694	-0.450049	-0.0442365	-0.0406665	-0.0773345	0.0392437
2004-12-15	2004	12	2.92006	-3.48013	-0.438871	Snow	-2.39997	-0.445563	-0.500319	0.0340809	-0.341692	0.0690836	-0.224918	-0.51695	0.0945495	0.0129893	0.275814	0.0222726	-1.49755	-0.507689	-0.019886	0.00324505	-0.0724734	-0.00319034	0.0925536	-1.70396	-0.211283	-0.06036	-0.0930144	0.0712505	-0.0400013	-0.0746025	0.0386732
2005-01-15	2005	1	3.27433	-2.9116	0.32043	0.449861	-2.48634	-0.393371	-0.321127	0.0875884	-0.13915	0.0201265	-0.203293	-0.630247	0.221657	0.0154264	-0.336774	-0.0843003	-1.45699	-0.837353	0.242452	0.00352442	-0.0232299	0.000749267	0.400001	-0.27042	-0.0164633	-0.0505342	-0.2138	0.220448	-0.0350464	-0.0672503	0.0368071
2005-02-15	2005	2	3.71739	-0.425671	2.72091	2.28773	-2.51976	-0.273069	-0.00468154	0.130494	0.121046	0.0764613	-0.134602	-0.549732	0.38752	-0.0134973	-0.293661	-0.15969	-1.25104	-1.12843	0.910785	0.00406311	-0.0232802	0.000260916	0.513643	1.75588	1.04445	0.00314897	0.00350758	0.404858	-0.0150592	-0.0379232	0.0608976
2005-03-15	2005	3	3.95068	1.77262	2.73344	3.5126	-2.58965	-0.148666	0.304571	0.161362	0.404473	-0.00449698	-0.0889335	-0.394002	0.494503	-0.000227508	-0.281057	-0.132441	-1.06247	-1.24604	1.21046	0.00432261	-0.0233124	3.36442e-05	0.530677	3.47054	0.406648	0.00945526	0.0132886	0.392009	-0.0138763	-0.0226033	0.0620665
2005-04-15	2005	4	4.12686	3.14079	1.21066	3.79627	-2.65433	-0.351079	0.301885	0.189087	0.636059	-0.00355384	-0.0577156	-0.138559	0.219068	-0.0127896	0.0471379	0.0138044	-0.902935	-1.2517	0.529373	0.00487773	-0.0726304	-0.00466602	0.540884	4.35013	0.186915	0.0326634	-0.0560008	-0.0164711	-0.012899	-0.022553	-0.0156355
2005-05-15	2005	5	4.17122	2.52636	1.51282	3.06273	-2.72897	-0.455358	0.376806	0.209799	0.800123	-0.0124874	-0.0453041	-0.103382	0.0830955	-0.0060821	0.138744	-0.0890945	-0.797714	-1.53611	0.538375	0.00543285	-0.0396406	-0.00269222	0.524823	3.79074	0.676251	0.0232344	-0.0387069	-0.0459149	-0.0140061	-0.0300407	-0.0115237
2005-06-15	2005	6	4.20587	1.48845	1.28545	1.50854	-2.80097	-0.446381	0.321665	0.230319	0.840198	-0.0656365	-0.0462968	0.365738	-0.0838758	-0.00216484	-0.00936348	0.00485301	-0.684607	-0.837148	-0.145886	0.00600589	-0.0396797	-0.00322618	0.496688	1.72429	1.31372	0.0208229	-0.140732	-0.0636234	-0.0139432	0.0315372	0.00752732
2005-07-15	2005	7	4.18805	1.96699	0.971204	-0.449861	-2.8721	-0.123101	0.411798	0.237506	0.175076	0.0706002	-0.0485166	0.820443	0.166964	0.000221742	0.0946709	-0.131195	-0.568969	1.79906	0.359006	0.00600589	0.0639562	0.00452991	0.441373	-1.46464	-0.138558	0.00661748	0.3819	0.178837	-0.0141106	0.219623	0.0491945
2005-08-15	2005	8	4.13699	1.74735	-1.766	-2.28773	-2.94778	0.304389	-0.101386	0.240932	-0.768633	0.235402	-0.0558779	0.925179	-0.297595	0.00501334	0.0168166	0.214159	-0.469495	3.66178	-0.92454	0.00593123	0.0334991	0.00236058	0.379431	-3.11782	-0.414263	-0.00734714	0.546023	-0.333793	-0.0138384	0.146102	-0.14641
2005-09-15	2005	9	3.77404	-0.169949	-1.74181	-3.5126	-3.06414	0.56428	-0.249807	0.238666	-0.737432	0.123978	-0.0874736	0.524142	-0.3578	0.0326719	0.243249	0.125031	-0.443955	2.21627	-0.924356	0.00585658	0.0865215	0.00664257	0.171395	-3.2922	-0.210384	-0.0589951	0.222303	-0.209107	-0.0200137	0.00292341	-0.0459539
2005-10-15	2005	10	3.33036	-2.94576	-0.294103	-3.79627	-3.20594	0.672935	-0.168317	0.230108	-0.624436	0.107735	-0.140064	-0.0460159	-0.120345	0.0435249	0.142511	0.0626178	-0.450822	0.0737233	-0.0387775	0.00578192	0.0865161	0.00673792	-0.0184657	-3.00158	-0.147423	-0.105545	-0.174535	-0.0220952	-0.0282381	-0.0749092	0.0257699
2005-11-15	2005	11	2.93528	-3.56976	0.0855343	-3.06273	-3.35493	0.728646	0.00845555	0.216073	-0.507164	0.0821355	-0.184474	-0.272013	-0.0304324	0.0507813	-0.0386549	0.00270383	-0.463511	-0.511191	0.202591	0.00578192	0.0236834	0.00377169	-0.187095	-2.4657	-0.19052	-0.118156	-0.450049	-0.0217123	-0.0292069	-0.0773345	0.028539
2005-12-15	2005	12	2.45473	-3.48013	-0.187405	-1.50854	-3.51134	-0.445563	-0.242466	0.190265	-0.341692	-0.000857581	-0.211902	-0.51695	0.0548953	0.066919	0.275814	-0.00301798	-0.477881	-0.507689	0.348091	0.00576203	-0.0724734	-0.00570732	-0.462595	-1.70396	-0.31991	-0.117888	-0.0930144	-0.0416863	-0.026623	-0.0746025	0.0232869
2006-01-15	2006	1	1.97953	-2.9116	1.00248		-3.66141	-0.393371	-0.054261	0.167707	-0.13915	-0.0188851	-0.225619	-0.630247	0.155648	0.0714726	-0.336774	-0.0828473	-0.427043	-0.837353	0.4062	0.00574213	-0.0232299	-0.00236431	-0.797509	-0.27042	0.437741	-0.122557	-0.2138	0.124895	-0.0312786	-0.0672503	0.0363054
2006-02-15	2006	2	1.56505	-0.425671	0.517854		-3.81033	-0.273069	-0.110354	0.101873	0.121046	0.0778906	-0.268994	-0.549732	0.142764	0.0936008	-0.293661	0.0651152	-0.435032	-1.12843	0.401257	0.00564486	-0.0232802	-0.00221671	-0.931516	1.75588	-0.00682284	-0.146934	0.00350758	-0.0648345	-0.0432789	-0.0379232	0.0150129
2006-03-15	2006	3	1.50282	1.77262	-0.142884		-3.90024	-0.148666	-0.0865021	-0.00438646	0.404473	0.05856	-0.263599	-0.394002	0.0380858	0.0739471	-0.281057	-0.0763801	-0.316376	-1.24604	0.381969	0.00556961	-0.0233124	-0.00210923	-0.959567	3.47054	-0.381437	-0.0946056	0.0132886	-0.0625245	-0.0379415	-0.0226033	-0.0125603
2006-04-15	2006	4	1.49231	3.14079	-0.895699		-3.96736	-0.351079	-0.172928	-0.101186	0.636059	0.118293	-0.242127	-0.138559	-0.129444	0.0632121	0.0471379	0.02488	-0.196609	-1.2517	-0.329228	0.00542539	-0.0726304	-0.00521368	-0.975689	4.35013	-0.320059	-0.0597343	-0.0560008	-0.0754143	-0.03364	-0.022553	-0.00652039
2006-05-15	2006	5	1.39102	2.52636	-1.47364		-4.03409	-0.455358	-0.195033	-0.200302	0.800123	0.0879205	-0.23397	-0.103382	-0.0573789	0.0590047	0.138744	0.0394707	-0.130438	-1.53611	-0.301333	0.00528116	-0.0396406	-0.00277927	-0.992764	3.79074	-1.11216	-0.048084	-0.0387069	0.0286252	-0.0336149	-0.0300407	0.0390921
2006-06-15	2006	6	1.37044	1.48845	-1.58146		-4.0973	-0.446381	-0.18279	-0.293276	0.840198	0.187268	-0.218525	0.365738	-0.0762488	0.0555439	-0.00936348	0.00178744	-0.0386639	-0.837148	-0.181777	0.00508604	-0.0396797	-0.00254507	-0.986188	1.72429	-1.22238	-0.0230234	-0.140732	-0.075801	-0.033208	0.0315372	-0.0290754
2006-07-15	2006	7	1.57689	1.96699	-1.39141		-4.09205	-0.123101	-0.155361	-0.371991	0.175076	-0.109911	-0.190765	0.820443	-0.211291	0.0330164	0.0946709	0.101548	0.0816004	1.79906	-0.387438	0.00508604	0.0639562	0.00428256	-0.863878	-1.46464	-0.441395	0.00717268	0.3819	-0.11425	-0.0312961	0.219623	-0.0776231
2006-08-15	2006	8	1.62379	1.74735	0.000414103		-4.09821	0.304389	-0.029812	-0.434817	-0.768633	-0.363966	-0.181384	0.925179	-0.107345	0.0416033	0.0168166	-0.0582755	0.153611	3.66178	-0.12377	0.0050396	0.0334991	0.00234921	-0.828441	-3.11782	0.456995	-0.00101842	0.546023	0.287822	-0.0325791	0.146102	-0.0636208
2006-09-15	2006	9	1.77553	-0.169949	0.130557		-4.07763	0.56428	-0.0417379	-0.505038	-0.737432	-0.293909	-0.154734	0.524142	-0.0328763	0.0230438	0.243249	0.00583974	0.291639	2.21627	-0.222749	0.00499317	0.0865215	0.00577525	-0.819653	-3.2922	0.587205	0.0380854	0.222303	0.112268	-0.025161	0.00292341	0.0108107
2006-10-15	2006	10	2.11847	-2.94576	-0.297582		-4.03187	0.672935	-0.14317	-0.560173	-0.624436	-0.291376	-0.106101	-0.0460159	-0.0564189	0.0105245	0.142511	0.0451287	0.457999	0.0737233	-0.153539	0.00494673	0.0865161	0.00584237	-0.721352	-3.00158	0.350565	0.0800902	-0.174535	-0.0679257	-0.0155817	-0.0749092	0.0134158
2006-11-15	2006	11	2.42765	-3.56976	0.346139		-3.97403	0.728646	-0.130989	-0.626157	-0.507164	-0.191327	-0.0487983	-0.272013	0.0192342	0.0154717	-0.0386549	-0.00351521	0.677509	-0.511191	0.162858	0.00494673	0.0236834	0.00226541	-0.704605	-2.4657	0.405904	0.093203	-0.450049	0.0676553	-0.00989094	-0.0773345	0.0141057
2006-12-15	2006	12	2.61257	-3.48013	2.13218	Soil Moisture	-3.91936	-0.445563	0.228543	-0.684837	-0.341692	-0.0703359	-0.0137961	-0.51695	0.189901	0.016653	0.275814	-0.223082	0.848435	-0.507689	0.464947	0.00495233	-0.0724734	-0.00489762	-0.730743	-1.70396	1.41595	0.101407	-0.0930144	0.101372	-0.0101474	-0.0746025	0.0297535
2007-01-15	2007	1	2.80752	-2.9116	0.737229	-0.222398	-3.85582	-0.393371	0.0661817	-0.757471	-0.13915	0.152387	0.0234353	-0.630247	0.019165	0.00765888	-0.336774	0.0840086	1.03541	-0.837353	-0.192131	0.00495792	-0.0232299	-0.00213731	-0.771395	-0.27042	0.836876	0.122134	-0.2138	-0.218089	-0.00139014	-0.0672503	-0.00897897
2007-02-15	2007	2	2.97941	-0.425671	0.924447	-0.192715	-3.78606	-0.273069	0.112445	-0.820826	0.121046	0.157938	0.0552104	-0.549732	0.138359	-0.0132927	-0.293661	-0.0507048	1.21993	-1.12843	0.402628	0.00470889	-0.0232802	-0.00183794	-0.810723	1.75588	-0.0221598	0.136979	0.00350758	0.120497	-0.00652821	-0.0379232	0.0672791
2007-03-15	2007	3	2.82966	1.77262	2.64552	-0.111395	-3.74586	-0.148666	0.308192	-0.88886	0.404473	0.281412	0.0291507	-0.394002	0.328938	-0.00468165	-0.281057	-0.147983	1.17192	-1.24604	0.88999	0.00445021	-0.0233124	-0.00154704	-0.821105	3.47054	0.65971	0.0973465	0.0132886	0.249582	-0.0127044	-0.0226033	0.0771544
2007-04-15	2007	4	2.671	3.14079	1.63573	-0.000226826	-3.71703	-0.351079	0.270838	-0.958089	0.636059	0.183387	-0.00615063	-0.138559	0.32221	0.00566814	0.0471379	0.14179	1.12557	-1.2517	0.982717	0.00411854	-0.0726304	-0.00390683	-0.832512	4.35013	-0.262276	0.0673422	-0.0560008	-0.0451369	-0.0179206	-0.022553	0.0460497
2007-05-15	2007	5	2.56117	2.52636	-0.424664	0.111002	-3.68352	-0.455358	0.110408	-1.02766	0.800123	0.211115	-0.0259153	-0.103382	0.154593	0.00628404	0.138744	0.106367	1.09176	-1.53611	0.527589	0.00378686	-0.0396406	-0.00121782	-0.840434	3.79074	-1.57814	0.0548219	-0.0387069	0.0241648	-0.0179704	-0.0300407	0.0203699
2007-06-15	2007	6	2.3439	1.48845	-0.215547	0.192489	-3.66078	-0.446381	0.143138	-1.10826	0.840198	0.130635	-0.050426	0.365738	0.202429	0.0102657	-0.00936348	-0.0608642	1.02209	-0.837148	1.0012	0.00363458	-0.0396797	-0.00102647	-0.886371	1.72429	-1.81002	0.0320938	-0.140732	0.117806	-0.0183806	0.0315372	0.0611845
2007-07-15	2007	7	1.95885	1.96699	0.289265	0.222398	-3.68991	-0.123101	0.279657	-1.19596	0.175076	-0.0461931	-0.0816081	0.820443	0.0608533	0.0279676	0.0946709	-0.144822	0.934186	1.79906	0.974217	0.00363458	0.0639562	0.00274558	-1.02782	-1.46464	-0.749394	0.00862318	0.3819	0.0624457	-0.0202678	0.219623	-0.150308
2007-08-15	2007	8	1.78685	1.74735	-1.95959	0.192715	-3.70615	0.304389	0.0605403	-1.31088	-0.768633	-0.304304	-0.0812263	0.925179	-0.520219	0.0163046	0.0168166	0.0703554	0.921738	3.66178	-1.46807	0.00408684	0.0334991	0.000197821	-1.06248	-3.11782	0.566444	0.0225507	0.546023	-0.211341	-0.0171067	0.146102	-0.153207
2007-09-15	2007	9	1.50237	-0.169949	-1.50026	0.111395	-3.7403	0.56428	-0.0331116	-1.42895	-0.737432	-0.200741	-0.107707	0.524142	-0.503521	0.0239958	0.243249	0.129085	0.816247	2.21627	-1.30355	0.0045391	0.0865215	0.00224924	-1.02642	-3.2922	0.657097	-0.013883	0.222303	-0.195815	-0.0251592	0.00292341	-0.051786
2007-10-15	2007	10	0.839147	-2.94576	-0.336232	0.000226826	-3.82256	0.672935	0.0496194	-1.56887	-0.624436	-0.11752	-0.163607	-0.0460159	-0.236089	0.0541694	0.142511	0.00887463	0.614667	0.0737233	-0.715948	0.00499136	0.0865161	0.00181763	-1.17445	-3.00158	0.708602	-0.070658	-0.174535	-0.0674215	-0.034543	-0.0749092	0.0317801
2007-11-15	2007	11	0.300936	-3.56976	-0.134344	-0.111002	-3.90715	0.728646	0.0750856	-1.69785	-0.507164	-0.0867996	-0.207244	-0.272013	-0.116448	0.0329643	-0.0386549	0.0267726	0.462309	-0.511191	-0.457917	0.00499136	0.0236834	0.000393401	-1.27326	-2.4657	0.423317	-0.0767968	-0.450049	-0.0350822	-0.0370181	-0.0773345	0.0363103
2007-12-15	2007	12	-0.0996137	-3.48013	0.223802	-0.192489	-3.98841	-0.445563	-0.0520158	-1.83176	-0.341692	0.0240956	-0.239681	-0.51695	0.0416004	0.025096	0.275814	-0.0191028	0.32633	-0.507689	-0.0678348	0.00514643	-0.0724734	-0.00509173	-1.26671	-1.70396	0.254538	-0.0907179	-0.0930144	0.0118493	-0.0388965	-0.0746025	0.035856
2008-01-15	2008	1	-0.430704	-2.9116	1.91146		-4.05653	-0.393371	0.0720615	-1.98096	-0.13915	-0.00318382	-0.245299	-0.630247	0.292481	0.0182254	-0.336774	-0.066514	0.283534	-0.837353	0.41037	0.00530151	-0.0232299	0.00294624	-1.33898	-0.27042	0.988564	-0.0809661	-0.2138	0.152142	-0.0350198	-0.0672503	0.0625843
2008-02-15	2008	2	-0.778008	-0.425671	1.26801		-4.12808	-0.273069	0.0445535	-2.17308	0.121046	0.0933528	-0.263807	-0.549732	0.139613	0.0271238	-0.293661	0.00117279	0.250657	-1.12843	0.106009	0.00702144	-0.0232802	0.00127665	-1.36737	1.75588	0.967122	-0.0929661	0.00350758	-0.0867623	-0.0374892	-0.0379232	0.00160932
2008-03-15	2008	3	-0.91871	1.77262	-1.56474		-4.17205	-0.148666	-0.25268	-2.33936	0.404473	0.0529574	-0.255453	-0.394002	-0.0572582	0.0137643	-0.281057	0.195655	0.313434	-1.24604	-0.670476	0.00858837	-0.0233124	-0.000258057	-1.38104	3.47054	-0.556663	-0.0740491	0.0132886	-0.260322	-0.032515	-0.0226033	-0.0156398
2008-04-15	2008	4	-1.1055	3.14079	-1.04631		-4.21082	-0.351079	-0.250504	-2.49738	0.636059	0.174918	-0.24852	-0.138559	0.0409321	0.0135939	0.0471379	-0.120597	0.308154	-1.2517	-0.028172	0.0106647	-0.0726304	-0.010453	-1.37859	4.35013	-0.901945	-0.0718278	-0.0560008	0.0203673	-0.0307546	-0.022553	0.0291825
2008-05-15	2008	5	-1.26537	2.52636	-1.40472		-4.24993	-0.455358	-0.298284	-2.65331	0.800123	0.229832	-0.242428	-0.103382	-0.0181441	0.0197338	0.138744	-0.00150269	0.313605	-1.53611	-0.325998	0.0127409	-0.0396406	-0.00831105	-1.36562	3.79074	-0.974343	-0.0694643	-0.0387069	-0.0186023	-0.0306764	-0.0300407	0.0105352
2008-06-15	2008	6	-1.37827	1.48845	-0.46646		-4.29117	-0.446381	-0.0438538	-2.80499	0.840198	0.0369636	-0.234237	0.365738	0.31883	0.027155	-0.00936348	-0.1602	0.332217	-0.837148	1.17753	0.0139046	-0.0396797	-0.00943561	-1.32437	1.72429	-2.23929	-0.0662212	-0.140732	0.333143	-0.0305486	0.0315372	0.119872
2008-07-15	2008	7	-1.39534	1.96699	-0.524196		-4.32783	-0.123101	0.0589331	-2.94879	0.175076	-0.598816	-0.221484	0.820443	-0.0213682	0.0314291	0.0946709	-0.0415028	0.375441	1.79906	1.13843	0.0139046	0.0639562	0.0131148	-1.24778	-1.46464	-0.870021	-0.0408889	0.3819	-0.0320433	-0.0293293	0.219623	-0.17088
2008-08-15	2008	8	-1.43845	1.74735	-0.42271		-4.36809	0.304389	0.194899	-3.06871	-0.768633	-0.541843	-0.218236	0.925179	-0.282965	0.0285526	0.0168166	-0.102207	0.398482	3.66178	-0.191489	0.0137539	0.0334991	0.00933389	-1.16264	-3.11782	0.502474	-0.0302191	0.546023	0.068433	-0.0313283	0.146102	-0.0792945
2008-09-15	2008	9	-1.33936	-0.169949	-0.899961		-4.40138	0.56428	0.162628	-3.17725	-0.737432	-0.348688	-0.20154	0.524142	-0.326492	0.0302115	0.243249	0.120825	0.454511	2.21627	-1.00517	0.0136032	0.0865215	0.0181006	-1.00753	-3.2922	0.667623	-0.0199147	0.222303	-0.163128	-0.0300661	0.00292341	-0.0257549
2008-10-15	2008	10	-1.07433	-2.94576	-0.341203		-4.41871	0.672935	0.176532	-3.27583	-0.624436	-0.281718	-0.181434	-0.0460159	-0.145151	0.0166849	0.142511	0.120037	0.547502	0.0737233	-0.583372	0.0134525	0.0865161	0.0182719	-0.739228	-3.00158	0.429046	-0.00749475	-0.174535	-0.102223	-0.0292673	-0.0749092	0.0274426
2008-11-15	2008	11	-0.728908	-3.56976	-0.459303		-4.42186	0.728646	0.094922	-3.36799	-0.507164	-0.236814	-0.158433	-0.272013	-0.0669678	0.0166216	-0.0386549	0.13217	0.633928	-0.511191	-0.406191	0.0134525	0.0236834	0.00589584	-0.413059	-2.4657	0.058144	-0.00362271	-0.450049	-0.0693382	-0.0279271	-0.0773345	0.0287534
2008-12-15	2008	12	-0.378007	-3.48013	0.297332	Runoff Storage	-4.42721	-0.445563	-0.0531551	-3.45702	-0.341692	-0.0762614	-0.135604	-0.51695	0.0905568	0.017491	0.275814	0.0397917	0.718217	-0.507689	0.0589605	0.0133391	-0.0724734	-0.0132844	-0.0749071	-1.70396	-0.0182025	-0.00592559	-0.0930144	0.231044	-0.026375	-0.0746025	0.0379663
2009-01-15	2009	1	-0.158579	-2.9116	1.12196	-0.0957622	-4.46805	-0.393371	0.000426519	-3.51238	-0.13915	0.0892387	-0.153693	-0.630247	0.239852	0.0378326	-0.336774	-0.120639	0.631256	-0.837353	0.339144	0.0132256	-0.0232299	-0.00678601	0.375168	-0.27042	0.296059	-0.0440045	-0.2138	0.243217	-0.037933	-0.0672503	0.0415093
2009-02-15	2009	2	-0.0745691	-0.425671	1.75368	-0.0802438	-4.54463	-0.273069	0.061684	-3.47025	0.121046	0.08803	-0.160643	-0.549732	0.236795	0.0574768	-0.293661	-0.009274	0.441847	-1.12843	0.587158	0.0128124	-0.0232802	-0.0063225	0.683921	1.75588	0.777233	-0.0690574	0.00350758	0.0129827	-0.0260491	-0.0379232	0.00531601
2009-03-15	2009	3	-0.0929672	1.77262	0.789889	-0.0432242	-4.64594	-0.148666	0.013209	-3.41322	0.404473	-0.0561022	-0.144877	-0.394002	0.0734431	0.0859741	-0.281057	-0.0388737	0.394018	-1.24604	0.364833	0.0125126	-0.0233124	-0.00599048	0.740873	3.47054	0.54099	-0.10155	0.0132886	-0.0837819	-0.0207601	-0.0226033	-0.0178089
2009-04-15	2009	4	-0.0286028	3.14079	2.02187	0.00537738	-4.74002	-0.351079	0.24085	-3.35919	0.636059	-0.0692862	-0.117819	-0.138559	0.18624	0.0822904	0.0471379	-0.190052	0.445633	-1.2517	0.871471	0.0120544	-0.0726304	-0.0118427	0.766366	4.35013	0.867114	-0.100269	-0.0560008	0.0952731	-0.0176391	-0.022553	0.0321494
2009-05-15	2009	5	-0.0285062	2.52636	1.56923	0.0525381	-4.83926	-0.455358	0.226842	-3.30601	0.800123	-0.185769	-0.103565	-0.103382	0.116948	0.0853958	0.138744	-0.0567319	0.470017	-1.53611	0.529058	0.0115962	-0.0396406	-0.00852802	0.775855	3.79074	0.942009	-0.104944	-0.0387069	-0.0107568	-0.0175814	-0.0300407	0.0160643
2009-06-15	2009	6	-0.0194492	1.48845	0.807862	0.0856212	-4.93604	-0.446381	0.111033	-3.24577	0.840198	-0.18656	-0.0964876	0.365738	-0.0359931	0.0842593	-0.00936348	0.0267949	0.492318	-0.837148	-0.0261072	0.0113257	-0.0396797	-0.0082184	0.791231	1.72429	1.04601	-0.102642	-0.140732	-0.0873845	-0.0176217	0.0315372	-0.0317505
2009-07-15	2009	7	-0.0898314	1.96699	-0.821586	0.0957622	-5.04098	-0.123101	-0.146857	-3.19352	0.175076	0.151464	-0.10017	0.820443	-0.226084	0.087691	0.0946709	0.137965	0.482037	1.79906	-1.24108	0.0113257	0.0639562	0.0107357	0.803668	-1.46464	0.783567	-0.12104	0.3819	-0.252526	-0.0188363	0.219623	-0.0387658
2009-08-15	2009	8	-0.36499	1.74735	-1.71695	0.0802438	-5.15418	0.304389	-0.234829	-3.14367	-0.768633	0.217417	-0.118577	0.925179	-0.193432	0.0992963	0.0168166	0.169017	0.426042	3.66178	-0.792997	0.0108349	0.0334991	0.00865531	0.689855	-3.11782	-0.666594	-0.154691	0.546023	-0.197009	-0.0198851	0.146102	-0.0272697
2009-09-15	2009	9	-0.587182	-0.169949	-0.879767	0.0432242	-5.27516	0.56428	-0.0924988	-3.08684	-0.737432	0.20925	-0.128613	0.524142	-0.0747263	0.0978017	0.243249	0.00903057	0.402524	2.21627	-0.333801	0.010344	0.0865215	0.0158615	0.568446	-3.2922	-0.602432	-0.160018	0.222303	-0.00765188	-0.0156552	0.00292341	-0.00271411
2009-10-15	2009	10	-0.776312	-2.94576	-0.638064	-0.00537738	-5.39999	0.672935	-0.0331036	-3.03197	-0.624436	0.112674	-0.126848	-0.0460159	-0.0286811	0.102567	0.142511	0.0714209	0.405185	0.0737233	-0.148451	0.00985321	0.0865161	0.0163729	0.43872	-3.00158	-0.635034	-0.159633	-0.174535	-0.00618712	-0.0141856	-0.0749092	0.0130532
2009-11-15	2009	11	-1.24558	-3.56976	0.166057	-0.0525381	-5.5692	0.728646	0.0808839	-2.97936	-0.507164	0.0973612	-0.153354	-0.272013	0.0128789	0.132914	-0.0386549	0.00223994	0.302009	-0.511191	0.193341	0.00985321	0.0236834	0.00624859	0.204075	-2.4657	-0.374481	-0.174432	-0.450049	0.129106	-0.0180834	-0.0773345	0.0184262
2009-12-15	2009	12	-1.56163	-3.48013	0.636367	-0.0856212	-5.72995	-0.445563	-0.00969805	-2.91181	-0.341692	0.00560197	-0.165633	-0.51695	0.0764028	0.137189	0.275814	-0.0387268	0.274002	-0.507689	0.37981	0.00971943	-0.0724734	-0.00966472	0.0118933	-1.70396	0.0442433	-0.168682	-0.0930144	0.173013	-0.0183497	-0.0746025	0.0153656
2010-01-15	2010	1	-1.7244	-2.9116	-0.614126		-5.88388	-0.393371	0.0578606	-2.8437	-0.13915	0.0187075	-0.171239	-0.630247	0.036504	0.131915	-0.336774	-0.075458	0.269503	-0.837353	0.0289575	0.00958565	-0.0232299	-0.00903598	-0.0414143	-0.27042	-0.653114	-0.17467	-0.2138	-0.0299253	-0.020485	-0.0672503	0.0114764
2010-02-15	2010	2	-1.67358	-0.425671	0.686389		-6.0174	-0.273069	0.0828022	-2.76123	0.121046	0.0609889	-0.159979	-0.549732	0.1157	0.117871	-0.293661	-0.0876032	0.295196	-1.12843	0.451595	0.00768364	-0.0232802	-0.00708363	-0.00367531	1.75588	0.00791838	-0.142833	0.00350758	0.0228322	-0.0091904	-0.0379232	0.0392155
2010-03-15	2010	3	-1.01527	1.77262	-0.557367		-6.07142	-0.148666	-0.0593618	-2.69659	0.404473	-0.114314	-0.0165482	-0.394002	-0.0337021	0.0657723	-0.281057	0.0385061	0.65223	-1.24604	0.138547	0.00588182	-0.0233124	-0.00524959	0.0440262	3.47054	-0.31888	-0.0328674	0.0132886	-0.147842	0.0342872	-0.0226033	-0.0552202
2010-04-15	2010	4	-0.736805	3.14079	-2.9012		-6.12434	-0.351079	-0.40535	-2.63044	0.636059	-0.166696	0.0798179	-0.138559	-0.329464	0.0367547	0.0471379	0.219648	0.793135	-1.2517	-0.714147	0.00357294	-0.0726304	-0.00336123	0.0654881	4.35013	-1.24775	0.00330393	-0.0560008	-0.18589	0.0359184	-0.022553	-0.0681819
2010-05-15	2010	5	-0.565053	2.52636	-1.68675		-6.17618	-0.455358	-0.365199	-2.56622	0.800123	-0.11492	0.138623	-0.103382	-0.272587	0.0170444	0.138744	0.0629294	0.861159	-1.53611	-0.198164	0.00126405	-0.0396406	0.000198793	0.0969562	3.79074	-0.685268	0.0261735	-0.0387069	-0.0728756	0.0361257	-0.0300407	-0.040839
2010-06-15	2010	6	-0.468825	1.48845	-0.696024		-6.22948	-0.446381	-0.442698	-2.51262	0.840198	-0.102451	0.172018	0.365738	-0.371779	0.00527034	-0.00936348	0.0424922	0.913339	-0.837148	-0.501118	-6.28385e-05	-0.0396797	0.00156475	0.108745	1.72429	1.08881	0.0378463	-0.140732	-0.29972	0.036122	0.0315372	-0.111118
2010-07-15	2010	7	-0.489542	1.96699	0.187953		-6.27141	-0.123101	-0.518724	-2.46598	0.175076	0.41358	0.187896	0.820443	-0.379024	-0.00367085	0.0946709	0.0608022	0.941105	1.79906	-1.39183	-6.28385e-05	0.0639562	-0.000699945	0.055976	-1.46464	1.98413	0.0303709	0.3819	-0.0218967	0.0362288	0.219623	0.0417044
2010-08-15	2010	8	-0.440265	1.74735	6.25807		-6.31542	0.304389	0.278212	-2.43242	-0.768633	0.281799	0.196929	0.925179	1.21223	-0.00657962	0.0168166	-0.350296	0.990394	3.66178	2.92706	0.000223396	0.0334991	-0.00235499	0.0444613	-3.11782	0.551218	0.0458859	0.546023	0.922	0.0362403	0.146102	0.438336
2010-09-15	2010	9	-0.34213	-0.169949	2.21675		-6.35776	0.56428	0.355092	-2.39653	-0.737432	0.312824	0.208985	0.524142	0.744068	-0.0112879	0.243249	-0.230091	1.06195	2.21627	0.697628	0.00050963	0.0865215	-0.00201077	0.0443666	-3.2922	0.179191	0.0721684	0.222303	0.194217	0.0354537	0.00292341	-0.0342483
2010-10-15	2010	10	-0.186809	-2.94576	0.833456		-6.39124	0.672935	0.336078	-2.35694	-0.624436	0.208275	0.219865	-0.0460159	0.330267	-0.0202906	0.142511	-0.0422456	1.11604	0.0737233	-0.0430109	0.000795864	0.0865161	-0.0022764	0.11624	-3.00158	0.0650636	0.0933726	-0.174535	0.0152418	0.0353574	-0.0749092	-0.0340029
2010-11-15	2010	11	0.0515657	-3.56976	0.0236445		-6.41269	0.728646	0.284721	-2.32338	-0.507164	0.0845413	0.235765	-0.272013	0.0245066	-0.0454512	-0.0386549	0.0393159	1.20093	-0.511191	-0.0794333	0.000795864	0.0236834	-0.000616679	0.245487	-2.4657	-0.274423	0.113791	-0.450049	-0.0190435	0.0363196	-0.0773345	-0.0360202
2010-12-15	2010	12	0.102528	-3.48013	-1.2764		-6.43794	-0.445563	0.195116	-2.30858	-0.341692	-0.0379034	0.240275	-0.51695	-0.138975	-0.0451993	0.275814	0.0363676	1.20775	-0.507689	-0.220742	0.000943297	-0.0724734	-0.000888587	0.289436	-1.70396	-0.866532	0.120102	-0.0930144	-0.205477	0.0357265	-0.0746025	-0.0374296
2011-01-15	2011	1	0.0556063	-2.9116	-1.80281		-6.4594	-0.393371	0.105305	-2.30327	-0.13915	-0.119016	0.247335	-0.630247	-0.273669	-0.0430627	-0.336774	0.0646145	1.24673	-0.837353	-0.356811	0.00109073	-0.0232299	0.00289375	0.17519	-0.27042	-1.0079	0.150762	-0.2138	-0.169176	0.0402174	-0.0672503	-0.0490878
2011-02-15	2011	2	-0.089201	-0.425671	0.279638		-6.46876	-0.273069	0.0261005	-2.33526	0.121046	0.0656835	0.244988	-0.549732	-0.144596	-0.0487992	-0.293661	0.022568	1.33952	-1.12843	0.265949	0.00190778	-0.0232802	0.00212703	0.00125912	1.75588	0.00184812	0.151451	0.00350758	0.0439385	0.0244639	-0.0379232	-0.0038783
2011-03-15	2011	3	-0.712569	1.77262	1.00378		-6.54035	-0.148666	0.00771586	-2.36827	0.404473	0.0323988	0.111703	-0.394002	-0.0313963	-0.02049	-0.281057	0.0167357	1.07264	-1.24604	0.367239	0.00262298	-0.0233124	0.00144406	-0.0373947	3.47054	0.625017	0.0784905	0.0132886	-0.00474981	-0.0115444	-0.0226033	-0.0105441
2011-04-15	2011	4	-0.830184	3.14079	0.0526797		-6.59095	-0.351079	-0.19606	-2.4117	0.636059	0.0173049	0.0563587	-0.138559	-0.115207	-0.032636	0.0471379	-0.0128887	1.09484	-1.2517	0.00284556	0.00360439	-0.0726304	-0.00339269	-0.0545425	4.35013	0.423253	0.111899	-0.0560008	-0.0494585	-0.00708755	-0.022553	-0.0136293
2011-05-15	2011	5	-0.972592	2.52636	-0.667664		-6.64891	-0.455358	-0.19544	-2.45056	0.800123	-0.0529385	0.0221875	-0.103382	-0.102035	-0.0314551	0.138744	0.114453	1.09064	-1.53611	-0.345809	0.0045858	-0.0396406	-0.00135377	-0.0747387	3.79074	0.0138145	0.122761	-0.0387069	-0.0937321	-0.00712193	-0.0300407	-0.00470848
2011-06-15	2011	6	-1.05933	1.48845	-0.668581		-6.70812	-0.446381	-0.221629	-2.48207	0.840198	-0.0692834	0.010979	0.365738	-0.126018	-0.0322476	-0.00936348	0.105649	1.09473	-0.837148	-0.214768	0.00522491	-0.0396797	-0.00195381	-0.0680067	1.72429	-0.105396	0.12722	-0.140732	-0.0211829	-0.00706058	0.0315372	-0.0140446
2011-07-15	2011	7	-1.12425	1.96699	-0.915032		-6.76181	-0.123101	-0.140632	-2.51102	0.175076	0.0747125	0.00495108	0.820443	-0.224234	-0.0326593	0.0946709	0.0209525	1.08989	1.79906	-0.427124	0.00522491	0.0639562	0.00381697	-0.0429318	-1.46464	-0.00413191	0.131189	0.3819	-0.114444	-0.00708625	0.219623	-0.104023
2011-08-15	2011	8	-1.15459	1.74735	-0.508022		-6.81188	0.304389	-0.0844588	-2.54213	-0.768633	-0.00460852	0.00699602	0.925179	-0.197268	-0.0344833	0.0168166	0.0173183	1.09324	3.66178	-0.378337	0.00524348	0.0334991	0.00120731	-0.00204683	-3.11782	0.13388	0.137147	0.546023	-0.0447856	-0.00668087	0.146102	0.0491582
2011-09-15	2011	9	-1.37353	-0.169949	1.83678		-6.86514	0.56428	0.2553	-2.58513	-0.737432	-0.0196985	-0.0109865	0.524142	0.299913	-0.0312225	0.243249	-0.355909	1.01384	2.21627	1.01212	0.00526205	0.0865215	0.00501373	-0.00697494	-3.2922	0.0247585	0.117508	0.222303	0.549781	-0.0107001	0.00292341	0.0653874
2011-10-15	2011	10	-1.6755	-2.94576	0.613248		-6.92614	0.672935	0.175413	-2.61954	-0.624436	0.00456774	-0.0367353	-0.0460159	0.176813	-0.023582	0.142511	-0.024783	0.901549	0.0737233	0.121075	0.00528062	0.0865161	0.00501577	-0.0660006	-3.00158	0.00494893	0.100779	-0.174535	0.138181	-0.0111308	-0.0749092	0.0120726
2011-11-15	2011	11	-1.90866	-3.56976	0.943023		-6.9806	0.728646	0.142184	-2.65909	-0.507164	0.0421092	-0.0435912	-0.272013	0.16936	-0.022219	-0.0386549	0.00657381	0.859827	-0.511191	0.310779	0.00528062	0.0236834	0.00256788	-0.155438	-2.4657	0.207286	0.0966897	-0.450049	0.0515592	-0.00953933	-0.0773345	0.010575
2011-12-15	2011	12	-2.07759	-3.48013	0.124715		-7.0292	-0.445563	0.142096	-2.69414	-0.341692	0.000218162	-0.0465751	-0.51695	0.0755399	-0.0285385	0.275814	0.0147662	0.81521	-0.507689	0.113649	0.00527411	-0.0724734	-0.00521941	-0.180701	-1.70396	-0.0954961	0.0923224	-0.0930144	-0.130068	-0.0112482	-0.0746025	0.00923701
2012-01-15	2012	1	-2.31446	-2.9116	0.203132		-7.09213	-0.393371	0.137206	-2.7244	-0.13915	-0.071177	-0.0611675	-0.630247	0.059373	-0.0197611	-0.336774	0.0194252	0.679179	-0.837353	0.250957	0.00526761	-0.0232299	-0.00106031	-0.156108	-0.27042	-0.185978	0.0707876	-0.2138	-0.0177002	-0.0161258	-0.0672503	0.0121199
2012-02-15	2012	2	-2.6146	-0.425671	0.177741		-7.19323	-0.273069	0.111407	-2.73762	0.121046	-0.0479131	-0.0861597	-0.549732	-0.029238	0.00537873	-0.293661	0.00751929	0.475069	-1.12843	0.177569	0.0053469	-0.0232802	-0.00108927	-0.10917	1.75588	0.0531395	0.0456593	0.00350758	-0.085944	-0.0198597	-0.0379232	-0.00778524
2012-03-15	2012	3	-2.95356	1.77262	-0.378861		-7.30685	-0.148666	0.0422821	-2.75671	0.404473	0.00781432	-0.10716	-0.394002	-0.121519	0.0253486	-0.281057	0.0625828	0.281223	-1.24604	-0.188779	0.00545614	-0.0233124	-0.00116628	-0.0929858	3.47054	-0.0277004	0.0230822	0.0132886	-0.15008	-0.0249611	-0.0226033	-0.00229556
2012-04-15	2012	4	-3.05035	3.14079	-0.52506		-7.40958	-0.351079	-0.0310008	-2.76898	0.636059	-0.0999868	-0.105286	-0.138559	-0.0358346	0.0333616	0.0471379	-0.0625303	0.267627	-1.2517	0.329402	0.00559924	-0.0726304	-0.00538753	-0.083106	4.35013	-0.621428	0.0294664	-0.0560008	-0.0161035	-0.0194398	-0.022553	0.0178202
2012-05-15	2012	5	-3.1165	2.52636	-0.550947		-7.50105	-0.455358	0.0734406	-2.78345	0.800123	-0.140636	-0.0995552	-0.103382	-0.0160987	0.0318181	0.138744	-0.0246541	0.287591	-1.53611	-0.0781655	0.00574233	-0.0396406	-0.00258832	-0.0674127	3.79074	-0.296676	0.0290605	-0.0387069	-0.0524386	-0.0192424	-0.0300407	-0.0130943
2012-06-15	2012	6	-3.26238	1.48845	-1.30792		-7.58993	-0.446381	-0.0949402	-2.80089	0.840198	-0.113529	-0.101922	0.365738	-0.188226	0.0301796	-0.00936348	0.14855	0.263023	-0.837148	-1.01543	0.00582098	-0.0396797	-0.0026279	-0.0743461	1.72429	0.196061	0.0249794	-0.140732	-0.177361	-0.0192897	0.0315372	-0.0603464
2012-07-15	2012	7	-3.31784	1.96699	-2.32315		-7.68324	-0.123101	-0.432339	-2.81173	0.175076	0.216701	-0.0993613	0.820443	-0.419828	0.0270778	0.0946709	0.262894	0.258819	1.79906	-2.04537	0.00582098	0.0639562	0.00417239	-0.036625	-1.46464	0.552825	0.0403249	0.3819	-0.325119	-0.0189281	0.219623	-0.136988
2012-08-15	2012	8	-3.38216	1.74735	-2.34796		-7.77577	0.304389	-0.484097	-2.81915	-0.768633	0.0433829	-0.0986098	0.925179	-0.343668	0.0281388	0.0168166	0.194335	0.243653	3.66178	-1.85491	0.00564189	0.0334991	0.00211972	0.00906995	-3.11782	0.316969	0.0439879	0.546023	-0.222552	-0.0191307	0.146102	0.000390819
2012-09-15	2012	9	-3.25557	-0.169949	2.55732		-7.84575	0.56428	0.00324504	-2.82559	-0.737432	0.0734921	-0.0708698	0.524142	0.382291	0.0124749	0.243249	-0.303451	0.308104	2.21627	1.55469	0.00546279	0.0865215	0.00653017	0.0892694	-3.2922	0.047072	0.0829291	0.222303	0.660969	-0.0116082	0.00292341	0.132552
2012-10-15	2012	10	-3.05695	-2.94576	1.20085		-7.89342	0.672935	0.0450418	-2.84529	-0.624436	0.0566994	-0.0289606	-0.0460159	0.237803	-0.00177716	0.142511	-0.0651104	0.428784	0.0737233	0.833416	0.0052837	0.0865161	0.00672983	0.175292	-3.00158	-0.0480243	0.111146	-0.174535	0.122944	-0.00802558	-0.0749092	0.0113353
2012-11-15	2012	11	-2.93049	-3.56976	0.214292		-7.92028	0.728646	0.0152101	-2.86184	-0.507164	0.0355962	0.000196242	-0.272013	0.0971714	0.00116313	-0.0386549	-0.0364699	0.468541	-0.511191	0.407246	0.0052837	0.0236834	0.00350856	0.265611	-2.4657	-0.296963	0.119556	-0.450049	-0.0202794	-0.00874589	-0.0773345	0.0092149
2012-12-15	2012	12	-2.87273	-3.48013	0.254397		-7.94795	-0.445563	-0.0587907	-2.87455	-0.341692	0.0505289	0.0187593	-0.51695	0.0409341	0.00286719	0.275814	-0.0538615	0.490376	-0.507689	0.388039	0.0051653	-0.0724734	-0.00511059	0.312027	-1.70396	-0.135572	0.126797	-0.0930144	0.0196036	-0.00626258	-0.0746025	0.0085897
2013-01-15	2013	1	-2.69719	-2.9116	-0.185964		-7.95425	-0.393371	-0.111024	-2.88706	-0.13915	0.00240853	0.0703072	-0.630247	-0.0630838	-0.00517448	-0.336774	0.0175711	0.652032	-0.837353	0.0961049	0.0050469	-0.0232299	-0.00298872	0.246741	-0.27042	-0.0404869	0.16717	-0.2138	-0.0701276	0.00796864	-0.0672503	-0.0144055
2013-02-15	2013	2	-2.44706	-0.425671	1.52927		-7.92416	-0.273069	0.00250026	-2.92277	0.121046	0.059959	0.125333	-0.549732	0.0921483	-0.0240078	-0.293661	-0.151061	0.900999	-1.12843	0.525053	0.00474151	-0.0232802	-0.002633	0.18258	1.75588	0.723783	0.196165	0.00350758	0.230845	0.0140057	-0.0379232	0.0486201
2013-03-15	2013	3	-2.03186	1.77262	1.08284		-7.85782	-0.148666	0.021225	-2.97046	0.404473	-0.0147941	0.19544	-0.394002	0.0787914	-0.0518698	-0.281057	-0.0312234	1.21664	-1.24604	0.323968	0.00453051	-0.0233124	-0.00238977	0.154205	3.47054	0.757378	0.24233	0.0132886	-0.0307214	0.0350875	-0.0226033	-0.0193532
2013-04-15	2013	4	-2.1979	3.14079	0.140091		-7.83334	-0.351079	0.0705007	-3.03121	0.636059	-0.0363424	0.180938	-0.138559	0.0278234	-0.0141417	0.0471379	0.0202565	1.14484	-1.2517	-0.0707275	0.00415723	-0.0726304	-0.00394552	0.142189	4.35013	0.237112	0.186283	-0.0560008	-0.0720089	0.0223196	-0.022553	-0.0325829
2013-05-15	2013	5	-2.29625	2.52636	-0.678189		-7.81076	-0.455358	0.051122	-3.09194	0.800123	0.0153217	0.171703	-0.103382	-0.0646004	-0.00465487	0.138744	0.0322675	1.11619	-1.53611	-0.644737	0.00378394	-0.0396406	-0.00205076	0.111672	3.79074	0.0812273	0.185525	-0.0387069	-0.122002	0.0221703	-0.0300407	-0.0247074
2013-06-15	2013	6	-2.29256	1.48845	-0.171166		-7.78783	-0.446381	0.0272725	-3.1545	0.840198	0.0899091	0.173124	0.365738	0.155302	0.00212497	-0.00936348	0.0801047	1.14786	-0.837148	0.0395928	0.00343571	-0.0396797	-0.00166346	0.0997219	1.72429	-0.76144	0.201049	-0.140732	0.131046	0.0224063	0.0315372	0.0687323
2013-07-15	2013	7	-2.39288	1.96699	-0.246608		-7.75294	-0.123101	-0.00155276	-3.22249	0.175076	0.199021	0.168671	0.820443	-0.027547	0.00673534	0.0946709	0.0572366	1.15152	1.79906	0.0495397	0.00343571	0.0639562	0.00289306	0.0378124	-1.46464	-0.29154	0.192292	0.3819	-0.129153	0.0220525	0.219623	-0.105524
2013-08-15	2013	8	-2.53517	1.74735	1.78742		-7.72464	0.304389	0.260919	-3.2926	-0.768633	-0.0554966	0.161985	0.925179	0.237023	0.00954442	0.0168166	-0.121415	1.14667	3.66178	1.02975	0.00325637	0.0334991	0.00197327	-0.0462282	-3.11782	0.0317618	0.184818	0.546023	0.190601	0.0219959	0.146102	0.212246
2013-09-15	2013	9	-2.84153	-0.169949	0.150818		-7.72083	0.56428	0.172028	-3.36662	-0.737432	-0.114428	0.137878	0.524142	-0.000479412	0.0239967	0.243249	0.137764	1.08814	2.21627	-0.0869312	0.00307702	0.0865215	0.00443647	-0.180773	-3.2922	0.172928	0.158686	0.222303	-0.0873473	0.0148996	0.00292341	-0.0471703
2013-10-15	2013	10	-3.03537	-2.94576	-0.000837386		-7.71664	0.672935	0.13926	-3.42545	-0.624436	-0.0919009	0.120762	-0.0460159	-0.0227482	0.023166	0.142511	0.0237886	1.05041	0.0737233	-0.132027	0.00289768	0.0865161	0.00463641	-0.272894	-3.00158	0.033952	0.163916	-0.174535	0.0610702	0.0184496	-0.0749092	-0.0169323
2013-11-15	2013	11	-3.07925	-3.56976	0.407236		-7.7047	0.728646	0.0747804	-3.48164	-0.507164	-0.0954259	0.115659	-0.272013	-0.00123085	0.0129684	-0.0386549	0.033083	1.06212	-0.511191	0.193736	0.00289768	0.0236834	0.00171585	-0.276116	-2.4657	0.101365	0.171936	-0.450049	0.113628	0.0176303	-0.0773345	-0.0143282
2013-12-15	2013	12	-3.07656	-3.48013	-0.745523		-7.69439	-0.445563	0.10635	-3.53889	-0.341692	-0.100925	0.118275	-0.51695	-0.112026	-0.000109185	0.275814	0.00443927	1.11909	-0.507689	-0.196793	0.00280308	-0.0724734	-0.00274837	-0.285153	-1.70396	-0.281306	0.183554	-0.0930144	-0.142237	0.0182466	-0.0746025	-0.0201661
2014-01-15	2014	1	-3.21548	-2.9116	-1.37519		-7.69359	-0.393371	-0.0320849	-3.59846	-0.13915	-0.127568	0.0900421	-0.630247	-0.163051	-0.0098968	-0.336774	0.0560025	1.0475	-0.837353	-0.357512	0.00270847	-0.0232299	-0.00280242	-0.220691	-0.27042	-0.581542	0.159064	-0.2138	-0.151703	0.00784374	-0.0672503	-0.0149595
2014-02-15	2014	2	-3.46387	-0.425671	-1.13019		-7.71337	-0.273069	-0.162641	-3.64753	0.121046	-0.103465	0.059167	-0.549732	-0.13097	-0.00752047	-0.293661	0.00587943	0.889674	-1.12843	-0.165987	0.00214626	-0.0232802	-0.00218987	-0.196504	1.75588	-0.511666	0.144836	0.00350758	-0.0314151	0.00523476	-0.0379232	-0.0277646
2014-03-15	2014	3	-3.94016	1.77262	0.664955		-7.77945	-0.148666	-0.0068512	-3.64279	0.404473	-0.0484601	-0.00982713	-0.394002	0.0786686	0.0169808	-0.281057	-0.110043	0.592057	-1.24604	0.495812	0.00167873	-0.0233124	-0.00169012	-0.1851	3.47054	-0.00877828	0.088779	0.0132886	0.185589	-0.0224651	-0.0226033	0.0807997
2014-04-15	2014	4	-3.85221	3.14079	1.26787		-7.80885	-0.351079	0.189316	-3.62451	0.636059	-0.117328	0.00570347	-0.138559	0.141821	0.000844281	0.0471379	-0.1171	0.619079	-1.2517	0.595484	0.001038	-0.0726304	-0.000826294	-0.161734	4.35013	0.502376	0.0972116	-0.0560008	0.113303	0.0190181	-0.022553	-0.0391129
2014-05-15	2014	5	-3.78033	2.52636	0.838172		-7.83869	-0.455358	0.202835	-3.60356	0.800123	-0.160065	0.0139416	-0.103382	0.124557	-0.00204914	0.138744	-0.127269	0.654995	-1.53611	0.500164	0.000397523	-0.0396406	0.000200437	-0.12308	3.79074	0.207537	0.0974232	-0.0387069	0.10552	0.0203156	-0.0300407	-0.0154572
2014-06-15	2014	6	-3.76633	1.48845	-0.364469		-7.87122	-0.446381	0.120188	-3.57859	0.840198	-0.200789	0.0213051	0.365738	-0.0316733	-0.00619979	-0.00936348	-0.0290219	0.647534	-0.837148	-0.319232	-1.52376e-05	-0.0396797	0.000652271	-0.0825144	1.72429	0.194336	0.0832627	-0.140732	-0.0450455	0.0201245	0.0315372	-0.0538202
2014-07-15	2014	7	-3.73783	1.96699	-1.88232		-7.89932	-0.123101	-0.0924748	-3.55587	0.175076	-0.0564368	0.0255128	0.820443	-0.25489	-0.00398414	0.0946709	0.096472	0.629651	1.79906	-1.32247	-1.52376e-05	0.0639562	-0.000402545	-0.0395327	-1.46464	0.0760566	0.0856008	0.3819	-0.193198	0.0201362	0.219623	-0.134915
2014-08-15	2014	8	-3.73035	1.74735	-2.73283		-7.92642	0.304389	-0.330268	-3.53311	-0.768633	0.241864	0.0283518	0.925179	-0.457273	-0.00783511	0.0168166	0.189979	0.622011	3.66178	-2.01699	3.96832e-05	0.0334991	-0.000420392	-0.0219194	-3.11782	0.144289	0.088413	0.546023	-0.385683	0.0201343	0.146102	-0.118291
2014-09-15	2014	9	-3.7218	-0.169949	2.08646		-7.94595	0.56428	0.0443624	-3.50465	-0.737432	0.242992	0.034171	0.524142	0.289595	-0.0106718	0.243249	-0.0212048	0.603827	2.21627	0.721643	9.4604e-05	0.0865215	-0.00026991	-0.0151453	-3.2922	0.287694	0.0906269	0.222303	0.0819031	0.0259125	0.00292341	0.439616
2014-10-15	2014	10	-3.44731	-2.94576	1.2737		-7.95204	0.672935	0.0164977	-3.48041	-0.624436	0.214404	0.0655538	-0.0460159	0.131318	-0.0175593	0.142511	0.0297928	0.701522	0.0737233	0.647855	0.000149525	0.0865161	-0.000301162	0.0943723	-3.00158	0.130539	0.111895	-0.174535	0.11563	0.0292216	-0.0749092	-0.0121344
2014-11-15	2014	11	-3.18948	-3.56976	0.68548		-7.94646	0.728646	-0.0738402	-3.45368	-0.507164	0.17627	0.0982514	-0.272013	0.104539	-0.0186914	-0.0386549	0.0149351	0.768126	-0.511191	0.398198	0.000149525	0.0236834	-0.00048913	0.197951	-2.4657	0.114084	0.130384	-0.450049	-0.014746	0.034499	-0.0773345	-0.0334908
2014-12-15	2014	12	-2.99038	-3.48013	-0.489702		-7.94546	-0.445563	0.0202702	-3.42854	-0.341692	0.0613957	0.114366	-0.51695	-0.0576258	-0.00538164	0.275814	0.0362995	0.779325	-0.507689	-0.0716285	0.000198562	-0.0724734	-0.000143852	0.330271	-1.70396	-0.38095	0.130774	-0.0930144	-0.0614002	0.0340967	-0.0746025	-0.0358758
2015-01-15	2015	1	-2.74169	-2.9116	-1.75929		-7.93967	-0.393371	-0.111207	-3.39768	-0.13915	-0.0552443	0.125611	-0.630247	-0.164552	-7.78446e-05	-0.336774	-2.81507e-05	0.810563	-0.837353	-0.21226	0.000247598	-0.0232299	0.000317502	0.483296	-0.27042	-1.07417	0.141628	-0.2138	-0.100519	0.0344074	-0.0672503	-0.0415455
2015-02-15	2015	2	-2.29595	-0.425671	-2.19552		-7.90284	-0.273069	-0.207542	-3.38079	0.121046	-0.0286539	0.18341	-0.549732	-0.185383	-0.0185597	-0.293661	-0.0171214	1.00703	-1.12843	-0.501548	0.000268927	-0.0232802	0.000346511	0.562852	1.75588	-1.18973	0.190803	0.00350758	-0.0508143	0.0618785	-0.0379232	-0.0150702
2015-03-15	2015	3	-1.72782	1.77262	1.74658		-7.84016	-0.148666	-0.0191396	-3.38183	0.404473	-0.0186139	0.279744	-0.394002	0.165692	-0.0514819	-0.281057	-0.12423	1.3609	-1.24604	0.899306	0.000244172	-0.0233124	0.000403491	0.575871	3.47054	0.544461	0.253272	0.0132886	0.276315	0.0756267	-0.0226033	0.0224177
2015-04-15	2015	4	-1.83385	3.14079	2.3434		-7.8261	-0.351079	0.273463	-3.37906	0.636059	-0.042034	0.268371	-0.138559	0.271524	-0.0411666	0.0471379	-0.0886757	1.28803	-1.2517	0.72577	0.000260987	-0.0726304	-4.92813e-05	0.581776	4.35013	1.00181	0.238025	-0.0560008	0.194355	0.0360357	-0.022553	0.00719741
2015-05-15	2015	5	-1.79975	2.52636	1.24684		-7.81017	-0.455358	0.186274	-3.37436	0.800123	-0.0875098	0.272185	-0.103382	0.0596901	-0.0504756	0.138744	0.0808747	1.27548	-1.53611	0.0140627	0.000277545	-0.0396406	0.000908855	0.608183	3.79074	1.06411	0.243038	-0.0387069	-0.0354101	0.0361127	-0.0300407	-0.0360812
2015-06-15	2015	6	-1.62748	1.48845	0.480891		-7.79157	-0.446381	0.110118	-3.36357	0.840198	-0.0455051	0.28703	0.365738	-0.162459	-0.0548654	-0.00936348	0.0832893	1.31709	-0.837148	-0.613926	0.000343987	-0.0396797	0.000881487	0.681793	1.72429	1.26633	0.259681	-0.140732	-0.0912239	0.0366305	0.0315372	-0.0665978
2015-07-15	2015	7	-1.45602	1.96699	1.18479		-7.77552	-0.123101	0.22562	-3.34936	0.175076	-0.0602134	0.298116	0.820443	0.166099	-0.0613387	0.0946709	-0.0679552	1.35095	1.79906	0.313859	0.000343987	0.0639562	-0.00050583	0.779582	-1.46464	0.211619	0.264474	0.3819	0.218032	0.0367648	0.219623	0.178108
2015-08-15	2015	8	-1.27602	1.74735	1.63041		-7.75953	0.304389	0.255039	-3.33289	-0.768633	0.0290676	0.30691	0.925179	0.420173	-0.0558332	0.0168166	-0.157089	1.39166	3.66178	1.45983	0.000364462	0.0334991	-0.00104223	0.875785	-3.11782	-0.597191	0.260688	0.546023	0.191667	0.036847	0.146102	0.0299746
2015-09-15	2015	9	-1.29718	-0.169949	-1.61049		-7.75363	0.56428	0.0207418	-3.33355	-0.737432	0.105157	0.295727	0.524142	-0.108434	-0.0458326	0.243249	0.137739	1.38904	2.21627	-0.938032	0.000384937	0.0865215	-0.000358452	0.885263	-3.2922	-0.541859	0.235316	0.222303	-0.245742	0.0301246	0.00292341	-0.039688
2015-10-15	2015	10	-1.65039	-2.94576	-0.114057		-7.76313	0.672935	0.018756	-3.33315	-0.624436	0.123574	0.259509	-0.0460159	-0.0168735	-0.0365629	0.142511	-0.062911	1.27325	0.0737233	-0.0744756	0.000405412	0.0865161	-0.000358359	0.715937	-3.00158	-0.174132	0.208652	-0.174535	0.0790207	0.0247331	-0.0749092	-0.00672205
2015-11-15	2015	11	-1.96237	-3.56976	1.52566		-7.79815	0.728646	0.000988917	-3.32923	-0.507164	0.181241	0.22615	-0.272013	0.154775	-0.0232899	-0.0386549	-0.0331445	1.18478	-0.511191	0.480884	0.000405412	0.0236834	5.22833e-05	0.572028	-2.4657	0.623318	0.183753	-0.450049	0.1316	0.0212107	-0.0773345	-0.0139886
2015-12-15	2015	12	-2.26671	-3.48013	0.844056		-7.83485	-0.445563	0.102281	-3.32787	-0.341692	0.131256	0.205618	-0.51695	-0.0158452	-0.0196694	0.275814	-0.027092	1.10662	-0.507689	0.00733557	0.000427335	-0.0724734	-0.000372625	0.398274	-1.70396	0.724523	0.183129	-0.0930144	-0.0562294	0.0216303	-0.0746025	-0.0217978
2016-01-15	2016	1	-2.55278	-2.9116	0.211885		-7.871	-0.393371	0.0120232	-3.34061	-0.13915	0.0854062	0.208039	-0.630247	-0.141443	-0.0149753	-0.336774	0.0809348	1.09753	-0.837353	-0.0107537	0.000449258	-0.0232299	0.000361542	0.162043	-0.27042	0.40151	0.178689	-0.2138	-0.183014	0.0270714	-0.0672503	-0.0332231
2016-02-15	2016	2	-2.93236	-0.425671	-1.81305		-7.91967	-0.273069	-0.119916	-3.37089	0.121046	-0.0464813	0.178514	-0.549732	-0.314687	-0.0112607	-0.293661	0.0955869	1.01131	-1.12843	-0.537207	0.000474642	-0.0232802	0.000386495	0.0206329	1.75588	-0.533769	0.155411	0.00350758	-0.319885	0.00315419	-0.0379232	-0.0370153
2016-03-15	2016	3	-3.39033	1.77262	-0.829491		-7.97771	-0.148666	0.00439962	-3.41179	0.404473	0.0160439	0.107578	-0.394002	-0.0967549	0.00198353	-0.281057	-0.0664585	0.76915	-1.24604	0.101582	0.000478938	-0.0233124	0.000414424	0.000913453	3.47054	-0.912501	0.128692	0.0132886	0.0809174	-0.0095892	-0.0226033	0.042936
2016-04-15	2016	4	-3.68388	3.14079	0.449726		-8.03134	-0.351079	0.0585378	-3.47592	0.636059	0.101912	0.0664816	-0.138559	0.0730982	-9.90179e-05	0.0471379	0.029533	0.672032	-1.2517	0.280132	0.000495522	-0.0726304	-0.000283816	-0.0218435	4.35013	-0.121474	0.120696	-0.0560008	0.0128966	-0.0143641	-0.022553	0.0153282
2016-05-15	2016	5	-4.09092	2.52636	-0.114076		-8.09183	-0.455358	0.0275014	-3.54574	0.800123	0.100255	0.0262768	-0.103382	0.0592204	0.0164284	0.138744	0.0574161	0.507892	-1.53611	-0.156228	0.00051211	-0.0396406	0.00093737	-0.0805582	3.79074	-0.332196	0.0919671	-0.0387069	0.108182	-0.0158527	-0.0300407	0.0209201
2016-06-15	2016	6	-4.6418	1.48845	0.0623341		-8.15451	-0.446381	0.0392151	-3.61952	0.840198	0.0575477	-0.0244906	0.365738	0.178113	0.0254324	-0.00936348	0.0593208	0.299274	-0.837148	0.294778	0.000535047	-0.0396797	0.000953506	-0.217945	1.72429	-0.668696	0.0657343	-0.140732	0.0494349	-0.0163048	0.0315372	0.0516305
2016-07-15	2016	7	-5.17371	1.96699	0.347497		-8.24293	-0.123101	0.109043	-3.69834	0.175076	-0.074666	-0.0534259	0.820443	0.163339	0.0346654	0.0946709	-0.119384	0.133751	1.79906	0.496363	0.000535047	0.0639562	-0.00039228	-0.376486	-1.46464	-0.329239	0.0448628	0.3819	0.158312	-0.0163348	0.219623	-0.0557986
2016-08-15	2016	8	-5.59047	1.74735	0.449295		-8.32122	0.304389	0.120192	-3.7803	-0.768633	-0.0143029	-0.0622935	0.925179	-0.0618505	0.0277567	0.0168166	-0.0817481	-0.0144579	3.66178	-0.0399292	0.000555508	0.0334991	-0.00118173	-0.480255	-3.11782	0.522214	0.0525923	0.546023	0.0791332	-0.0128537	0.146102	-0.0732455
2016-09-15	2016	9	-5.61964	-0.169949	-0.810642		-8.37784	0.56428	0.00139364	-3.84694	-0.737432	-0.150977	-0.0369452	0.524142	-0.268925	0.0246928	0.243249	0.0422232	-0.0599766	2.21627	-0.654427	0.000575969	0.0865215	-0.000350475	-0.39236	-3.2922	0.462681	0.0786697	0.222303	-0.185046	-0.0095182	0.00292341	-0.0573445
2016-10-15	2016	10	-5.87887	-2.94576	-0.770091		-8.45641	0.672935	-0.0137961	-3.92035	-0.624436	-0.127029	-0.0442769	-0.0460159	-0.195545	0.0364147	0.142511	0.0624403	-0.208561	0.0737233	-0.562344	0.00059643	0.0865161	-0.000350327	-0.331166	-3.00158	0.168393	0.0600835	-0.174535	-0.11716	-0.0152115	-0.0749092	0.01536
2016-11-15	2016	11	-6.25703	-3.56976	-0.790252		-8.5537	0.728646	0.00434585	-3.99232	-0.507164	-0.0410792	-0.0624025	-0.272013	-0.165881	0.0488848	-0.0386549	0.00272911	-0.377001	-0.511191	-0.46075	0.00059643	0.0236834	0.000136515	-0.362281	-2.4657	-0.0910166	0.0550139	-0.450049	-0.0544554	-0.0138308	-0.0773345	0.0156274
2016-12-15	2016	12	-6.52804	-3.48013	-1.27744		-8.64301	-0.445563	-0.150588	-4.06718	-0.341692	-0.0753256	-0.0734332	-0.51695	-0.0840183	0.0489651	0.275814	0.0150689	-0.447992	-0.507689	-0.424326	0.000618352	-0.0724734	-0.000563643	-0.38038	-1.70396	-0.399307	0.048889	-0.0930144	-0.172446	-0.0145205	-0.0746025	0.0139935
2017-01-15	2017	1	-6.74694	-2.9116	-0.595181		-8.72671	-0.393371	-0.071717	-4.1357	-0.13915	-0.102964	-0.0815746	-0.630247	0.0417594	0.0406324	-0.336774	-0.0575767	-0.498689	-0.837353	-0.193043	0.000640275	-0.0232299	0.000416055	-0.385843	-0.27042	-0.295835	0.0571088	-0.2138	0.0313187	-0.0168012	-0.0672503	0.0524229
2017-02-15	2017	2	-6.92725	-0.425671	1.83178		-8.80466	-0.273069	0.0856301	-4.23232	0.121046	0.0152024	-0.0858839	-0.549732	0.25389	0.0413499	-0.293661	0.00620975	-0.498489	-1.12843	0.426365	0.000665426	-0.0232802	0.000441242	-0.396296	1.75588	0.937898	0.0637418	0.00350758	0.0847137	-0.0153614	-0.0379232	0.0215257
2017-03-15	2017	3	-7.14168	1.77262	-0.188844		-8.88416	-0.148666	-0.032018	-4.34882	0.404473	0.0721861	-0.087075	-0.394002	0.00991829	0.0540487	-0.281057	0.0221387	-0.500069	-1.24604	-0.412218	0.000669738	-0.0233124	0.000469154	-0.419097	3.47054	0.241842	0.0569276	0.0132886	-0.0703528	-0.0140927	-0.0226033	-0.0208796
2017-04-15	2017	4	-7.29988	3.14079	-0.4722		-8.96278	-0.351079	-0.177505	-4.4528	0.636059	0.215211	-0.0864066	-0.138559	0.00847889	0.0509596	0.0471379	0.128115	-0.466903	-1.2517	-0.602208	0.000686282	-0.0726304	-0.000474575	-0.434373	4.35013	-0.0823331	0.0655758	-0.0560008	0.00718235	-0.0138172	-0.022553	0.0313494
2017-05-15	2017	5	-7.48138	2.52636	0.0243288		-9.04377	-0.455358	-0.0923309	-4.55682	0.800123	0.21302	-0.0853136	-0.103382	0.0384424	0.0518192	0.138744	0.0229884	-0.454778	-1.53611	-0.0454519	0.000702829	-0.0396406	0.00100972	-0.447094	3.79074	-0.18284	0.0677143	-0.0387069	0.0589363	-0.0138348	-0.0300407	0.0106257
2017-06-15	2017	6	-7.62958	1.48845	0.423265		-9.12025	-0.446381	0.000559487	-4.66739	0.840198	0.283179	-0.0808115	0.365738	0.136738	0.0539675	-0.00936348	-0.0692068	-0.420282	-0.837148	0.405971	0.000725771	-0.0396797	0.00102585	-0.460706	1.72429	-0.491497	0.0788291	-0.140732	0.134977	-0.0136429	0.0315372	0.0216005
2017-07-15	2017	7	-7.72742	1.96699	0.737432		-9.17585	-0.123101	0.106663	-4.7693	0.175076	-0.163192	-0.0751164	0.820443	0.133317	0.0488654	0.0946709	-0.124974	-0.382399	1.79906	1.01491	0.000725771	0.0639562	-0.000281194	-0.458673	-1.46464	-0.372485	0.097853	0.3819	0.184918	-0.0134835	0.219623	-0.0413726
2017-08-15	2017	8	-7.97366	1.74735	0.25941		-9.241	0.304389	0.0858699	-4.85295	-0.768633	-0.339697	-0.0826261	0.925179	-0.0558107	0.0569923	0.0168166	0.0414028	-0.389012	3.66178	0.315668	0.000746217	0.0334991	-0.00132069	-0.531809	-3.11782	0.300152	0.0831425	0.546023	-0.0331868	-0.0170977	0.146102	-0.0537771
2017-09-15	2017	9	-8.55617	-0.169949	0.227443		-9.32655	0.56428	0.00674439	-4.94798	-0.737432	-0.297716	-0.115218	0.524142	-0.182631	0.0607299	0.243249	-0.030883	-0.480915	2.21627	0.164507	0.000766662	0.0865215	-0.000342648	-0.789972	-3.2922	0.676988	0.062985	0.222303	-0.0655834	-0.0199694	0.00292341	-0.0435879
2017-10-15	2017	10	-9.05025	-2.94576	0.223248		-9.40766	0.672935	-0.0344667	-5.04843	-0.624436	-0.24709	-0.129094	-0.0460159	-0.0976116	0.0617805	0.142511	0.0473894	-0.521808	0.0737233	-0.103594	0.000787108	0.0865161	-0.000342435	-1.03869	-3.00158	0.723262	0.0532201	-0.174535	-0.0846352	-0.0202812	-0.0749092	0.0202191
2017-11-15	2017	11	-9.57562	-3.56976	0.750008		-9.48451	0.728646	0.0174277	-5.15605	-0.507164	-0.204185	-0.144441	-0.272013	-0.0298166	0.0572766	-0.0386549	0.0201172	-0.572393	-0.511191	0.148591	0.000787108	0.0236834	0.000221137	-1.29897	-2.4657	0.682334	0.0461901	-0.450049	0.0877467	-0.0234598	-0.0773345	0.0275595
2017-12-15	2017	12	-10.0077	-3.48013	1.02805		-9.55997	-0.445563	0.0991276	-5.2554	-0.341692	-0.11009	-0.154526	-0.51695	0.0654154	0.055397	0.275814	-0.0525891	-0.634869	-0.507689	0.217152	0.000809032	-0.0724734	-0.000754322	-1.47415	-1.70396	0.718857	0.0400632	-0.0930144	0.0646663	-0.0249665	-0.0746025	0.026352
2018-01-15	2018	1	-10.4599	-2.9116	0.162962		-9.65109	-0.393371	0.0709221	-5.35208	-0.13915	0.109701	-0.172794	-0.630247	0.0428618	0.0664136	-0.336774	0.0141656	-0.763248	-0.837353	-0.00785219	0.000830955	-0.0232299	0.000470725	-1.58684	-0.27042	0.0275262	0.0272496	-0.2138	-0.115348	-0.0283557	-0.0672503	0.0206071
2018-02-15	2018	2	-10.8541	-0.425671	-1.23157		-9.74081	-0.273069	-0.00482395	-5.41418	0.121046	0.0566859	-0.196199	-0.549732	-0.0269017	0.0659188	-0.293661	0.0264917	-0.954339	-1.12843	-0.220619	0.000856116	-0.0232802	0.000495902	-1.60795	1.75588	-0.948403	0.0210948	0.00350758	-0.11453	-0.0284219	-0.0379232	0.000125036
2018-03-15	2018	3	-11.1824	1.77262	-2.07702		-9.82592	-0.148666	-0.0636546	-5.51985	0.404473	0.0378029	-0.207413	-0.394002	-0.0362548	0.0648473	-0.281057	0.0239469	-1.06695	-1.24604	-0.33605	0.000860445	-0.0233124	0.000523798	-1.61667	3.47054	-1.54523	0.0171699	0.0132886	-0.147774	-0.0284116	-0.0226033	-0.0103016
2018-04-15	2018	4	-11.365	3.14079	-2.71159		-9.90642	-0.351079	-0.15598	-5.62118	0.636059	0.0920806	-0.201085	-0.138559	-0.0610053	0.0772547	0.0471379	0.0477734	-1.08885	-1.2517	-0.587285	0.000876952	-0.0726304	-0.000665246	-1.62015	4.35013	-2.01988	0.0150232	-0.0560008	-0.0266256	-0.0205023	-0.022553	-0.00010849
2018-05-15	2018	5	-11.3814	2.52636	-1.26001		-9.97478	-0.455358	-0.0668386	-5.71876	0.800123	0.182767	-0.183613	-0.103382	0.0157245	0.06831	0.138744	-0.0160565	-1.00948	-1.53611	-0.240459	0.000893461	-0.0396406	0.00108217	-1.57917	3.79074	-1.15297	0.0338337	-0.0387069	0.019294	-0.018625	-0.0300407	-0.00266488
2018-06-15	2018	6	-11.3843	1.48845	-1.2495		-10.0466	-0.446381	-0.166636	-5.80796	0.840198	0.263595	-0.16934	0.365738	0.00605331	0.0650911	-0.00936348	0.0518681	-0.957531	-0.837148	-0.597328	0.000916407	-0.0396797	0.0010983	-1.48788	1.72429	-0.816556	0.0376097	-0.140732	0.0224334	-0.0186238	0.0315372	-0.0140889
2018-07-15	2018	7	-11.3986	1.96699	-0.320632		-10.1279	-0.123101	-0.0179305	-5.90623	0.175076	0.228524	-0.163367	0.820443	-0.0592911	0.0701998	0.0946709	-0.152246	-0.898979	1.79906	-0.761599	0.000916407	0.0639562	-0.0001699	-1.39988	-1.46464	0.315463	0.0453939	0.3819	0.16352	-0.0187687	0.219623	-0.0368819
2018-08-15	2018	8
2018-09-15	2018	9
2018-10-15	2018	10
2018-11-15	2018	11
2018-12-15	2018	12
			TWS	Aquifers	Glaciers	Ground Water	Irr Runoff Storage	Reservoirs+	Rice Paddy	Snow	Soil Moisture	Runoff Storage			TWS	Aquifers	Glaciers	Ground Water	Irr Runoff Storage	Reservoirs+	Rice Paddy	Snow	Soil Moisture	Runoff Storage
		Correlation, R2	0.91595	0.959364	0.917762	0.0947714	0.234204	0.00141029	0.454767	0.212331	0.15348	0.100777		Amplitude, cm	3.25471	-0.500638	0.744151	0.694517	0.177002	1.82547	-0.0620155	3.82283	0.222398	0.0959131
		Pearson, R	-0.957053	-0.979471	-0.957999	-0.30785	0.483946	0.0375538	0.674364	-0.460794	0.391765	-0.317454		Shift, month	-2.40966	-0.658582	-1.27902	-4.48068	-5.35926	-5.50654	0.0116784	-0.774731	-4.00195	-3.89287
Sum (%) =	100	Contribution, %		67.0256	29.1462	0.688322	-0.273394	-0.448259	-0.0342345	4.22544	-0.439776	0.110139		Error	7.18779	0.885953	0.554894	0.271332	0.27852	10.2418	0.0129674	4.48032	0.508641	0.0404274
		Slope	-36.2358	-24.2872	-10.5613	-0.249419	0.0990664	0.16243	0.0124051	-1.53112	0.159356	-0.0399098		Normalized Err	0.0343222	0.0783376	0.0417093	0.0312505	0.124233	0.0730472	0.0765095	0.0230706	0.133618	0.0873472	Sum =
		95 % conf. bar, ±	0.659967	3.19469	1.7852
		Slopes Sum	-36.2357											Contribution, %		-9.35707	18.973	9.97503	0.143491	-2.84399	-0.568522	76.9837	4.59271	2.10202	100
																			TWS_anom	Aqf_Storage	glVolume	grdWater	irrRffStorage	resStorage	ricePaddyStrg	snowPack	soilMoist	surfRffStorage
																			24.1735	10.1553	2.99888	1.08654	-0.00521187	3.14456	0.0554096	-0.884408	0.358128	0.264374
																			23.8896	10.5792	1.99432	1.18585	-0.0848671	4.99167	0.0250029	-2.52213	0.528892	0.191716
																			21.8909	10.8368	1.96516	0.783751	0.145338	3.52968	0.0780757	-2.697	0.199684	0.049427
																			19.0869	10.9374	2.02098	0.211765	0.0490362	1.36275	0.0781208	-2.33581	-0.202474	-0.0348918
																			18.4956	10.9896	2.08392	0.00101306	-0.139723	0.814506	0.0152881	-1.76226	-0.475013	-0.0317515
																			18.7435	9.81704	2.21271	-0.224795	0.165628	0.852106	-0.0808262	-0.849554	-0.121394	-0.0274432
																			19.5204	9.86693	2.38253	-0.323323	-0.445882	0.532108	-0.0315401	0.808929	-0.244006	-0.0253087
																			21.9562	9.95751	2.66349	-0.281895	-0.378405	-0.0281993	-0.0314623	3.13505	-0.0646745	-0.0151867
																			24.1261	10.0409	3.02126	-0.134016	-0.345619	-0.291838	-0.0314088	4.9511	-0.0852646	0.000981507
																			25.4944	9.78506	3.3446	0.110395	-0.00182892	-0.389047	-0.0805867	5.89058	-0.158224	-0.00653444
																			24.9605	9.63043	3.59907	0.144356	0.0957025	-0.709485	-0.0474569	5.405	-0.143036	-0.0140893
																			23.9922	9.59117	3.72976	0.609892	-0.049849	-0.0367534	-0.0474066	3.40104	-0.253089	0.0474821
																			24.5212	9.84727	3.14402	1.06148	0.06156	2.58271	0.0562293	0.263122	0.271379	0.233475
																			24.1889	10.2072	2.27121	1.15697	-0.0177427	4.38637	0.0258221	-1.43408	0.43143	0.161755
																			22.3424	10.4117	2.36693	0.76296	0.202466	2.93429	0.0788945	-1.56622	0.131576	0.0198238
																			19.5744	10.4633	2.5552	0.191573	0.101921	0.757374	0.0789392	-1.25705	-0.260973	-0.055897
																			18.9663	10.461	2.74219	-0.0479176	-0.076653	0.10542	0.0161065	-0.631838	-0.540202	-0.0617629
																			19.0767	9.22901	2.97122	-0.304192	0.237942	0.0718014	-0.0800078	0.196507	-0.184097	-0.0614939
																			19.6366	9.22718	3.23798	-0.428196	-0.376275	-0.324204	-0.0307217	1.69368	-0.310231	-0.0526272
																			22.2302	9.30794	3.55431	-0.329787	-0.348975	-0.535954	-0.0306436	3.68945	-0.0615127	-0.0146308
																			24.6639	9.41397	3.86558	-0.129953	-0.363382	-0.49762	-0.0305907	5.39109	0.00353666	0.0112782
																			26.346	9.21418	4.1392	0.186862	-0.0641138	-0.322257	-0.0797688	6.27929	-0.0349623	0.027569
																			25.9063	9.10471	4.3486	0.255286	0.022645	-0.518282	-0.0466393	5.72516	-0.005388	0.0202048
																			25.0378	9.10765	4.43518	0.743991	-0.128359	0.262794	-0.0465887	3.66766	-0.0863668	0.08189
																			25.6306	9.44907	3.81108	1.20867	-0.034362	2.96365	0.0570472	0.475194	0.430412	0.269888
																			25.5933	9.89209	2.92318	1.31823	-0.108931	4.90506	0.0266397	-1.15468	0.598488	0.193207
																			23.3924	10.1412	3.0102	0.88798	0.134617	3.40288	0.0797118	-1.54833	0.238531	0.0455952
																			20.4168	10.2397	3.16941	0.299372	0.0334571	1.27126	0.0797562	-1.47437	-0.169299	-0.0325316
																			19.426	10.2714	3.3243	0.0425554	-0.140334	0.627385	0.0169235	-1.22623	-0.452509	-0.0374706
																			19.114	9.06796	3.53285	-0.219469	0.186147	0.586778	-0.0791908	-0.840329	-0.0879139	-0.0327862
																			19.3502	9.0914	3.77896	-0.342624	-0.425718	0.273831	-0.0299046	0.229181	-0.198779	-0.0261783
																			21.9128	9.21541	4.09618	-0.237846	-0.386625	0.091593	-0.0298272	2.09164	0.0415415	0.0306992
																			23.8873	9.31802	4.46941	-0.139709	-0.340814	-0.220915	-0.0297742	3.8323	-0.0227642	0.0215273
																			24.9154	9.06295	4.77623	0.0240683	0.0194944	-0.495975	-0.0789527	4.74222	-0.137421	0.00279687
																			24.1036	8.91274	5.01277	0.00394197	0.120456	-0.961194	-0.0458235	4.20311	-0.137557	-0.00480936
																			22.9698	8.87881	5.13618	0.441548	-0.0211648	-0.416289	-0.0457725	2.18423	-0.244867	0.0571057
																			23.3487	9.13324	4.55069	0.876561	0.092287	2.07565	0.0578634	-0.957085	0.274341	0.245108
																			22.8807	9.48818	3.67071	0.959799	0.0187624	3.75523	0.0274557	-2.62562	0.41472	0.171497
																			21.0041	9.68012	3.77006	0.5512	0.236571	2.19948	0.0805274	-2.64153	0.0991218	0.0285422
																			18.098	9.71258	3.94184	-0.0330028	0.143167	-0.114457	0.0805715	-2.27037	-0.30758	-0.0547163
																			17.4959	9.68376	4.14046	-0.25881	-0.0356721	-0.796634	0.0177388	-1.61723	-0.583171	-0.0545474
																			17.7164	8.42524	4.37668	-0.511292	0.272883	-0.862169	-0.0783754	-0.617241	-0.234007	-0.0553113
																			18.373	8.38498	4.64831	-0.627465	-0.328758	-1.2992	-0.0290893	1.02697	-0.358224	-0.0444912
																			20.8744	8.42425	4.89537	-0.516921	-0.303433	-1.53236	-0.0290121	3.04981	-0.0933247	-0.0199642
																			23.2901	8.49828	5.08462	-0.279547	-0.323555	-1.39376	-0.0289594	4.71073	0.00509474	0.0171668
																			24.901	8.27377	5.22867	0.0670985	-0.026995	-1.13273	-0.0781388	5.54922	-0.00492187	0.0250591
																			24.3207	8.13885	5.3072	0.150053	0.0579865	-1.29073	-0.0450106	4.95844	0.0262137	0.0176871
																			23.2502	8.11393	5.24847	0.646329	-0.0965674	-0.465958	-0.0449591	2.84194	-0.0717828	0.0788217
																			23.7772	8.42006	4.49685	1.12412	0.000506093	2.30697	0.0586768	-0.363687	0.465203	0.268448
																			23.7012	8.83268	3.47053	1.2506	-0.0857585	4.33492	0.0282664	-1.97957	0.654838	0.194659
																			21.7297	9.07977	3.41463	0.860405	0.143529	3.00571	0.0813355	-2.24387	0.334996	0.0531577
																			18.9143	9.17862	3.44546	0.29839	0.0369938	0.999585	0.0813769	-2.05664	-0.0495957	-0.0199848
																			18.2944	9.23926	3.47506	0.0976606	-0.153739	0.597448	0.0185442	-1.65062	-0.310043	-0.0192067
																			18.3046	8.07101	3.55989	-0.120991	0.162766	0.726553	-0.07757	-1.05757	0.057051	-0.0165166
																			18.801	8.13044	3.68445	-0.217516	-0.450209	0.516911	-0.0282839	0.237019	-0.0593493	-0.0124692
																			21.0848	8.2375	3.91413	-0.172056	-0.385751	0.136449	-0.0282088	2.25727	0.111895	0.0135359
																			23.4128	8.37171	4.21045	0.00698302	-0.381782	0.0781703	-0.0281582	3.97304	0.133442	0.0489196
																			24.7633	8.16883	4.45855	0.259596	-0.0370123	0.0262209	-0.0773404	4.86545	0.0466947	0.0523528
																			24.187	8.0674	4.64149	0.29208	0.0584988	-0.255781	-0.0442149	4.31786	0.0645324	0.0451211
																			23.1679	8.07623	4.70203	0.757321	-0.0848691	0.432049	-0.0441633	2.25958	-0.0370306	0.106782
																			23.6355	8.40739	4.04851	1.20433	0.0200008	3.03827	0.0594726	-0.920934	0.484874	0.293591
																			23.3312	8.84021	3.10549	1.30082	-0.0539993	4.85823	0.0290615	-2.6123	0.643289	0.220404
																			21.4374	9.10614	3.14074	0.899644	0.171028	3.40573	0.08213	-2.77228	0.327262	0.0770063
																			18.9295	9.23018	3.27472	0.351841	0.070658	1.3213	0.0821707	-2.34929	-0.0535332	0.00146832
																			18.4804	9.27885	3.41201	0.115882	-0.0930681	0.680879	0.019338	-1.58776	-0.339984	-0.00578084
																			18.7845	8.09463	3.60274	-0.1509	0.221002	0.638378	-0.0767762	-0.549462	0.00746792	-0.00257634
																			19.7168	8.15547	3.83435	-0.255449	-0.405238	0.370441	-0.0274901	1.12613	-0.097905	0.0165403
																			22.4726	8.2766	4.14244	-0.177016	-0.36368	0.180628	-0.0274148	3.31389	0.101573	0.0255996
																			24.6481	8.37716	4.47986	-0.0645308	-0.334837	0.0190397	-0.027364	5.08547	0.0780009	0.0352872
																			25.9806	8.14474	4.74616	0.165733	-0.00805441	-0.00259373	-0.0765465	5.9864	-0.00288947	0.0276907
																			25.4194	8.0134	4.9466	0.193372	0.0829921	-0.274752	-0.0434212	5.45751	0.023461	0.0202184
																			24.4395	7.99589	5.0256	0.663091	-0.0626945	0.431012	-0.043369	3.43115	-0.0829049	0.0817773
																			24.9017	8.27596	4.39152	1.1146	0.0479687	3.08038	0.0602669	0.230956	0.430408	0.269655
																			24.576	8.65942	3.48682	1.2123	-0.0284832	4.9388	0.0298554	-1.4967	0.578306	0.195662
																			22.4247	8.86922	3.54657	0.793883	0.201807	3.44672	0.0829234	-1.80113	0.234697	0.05001
																			19.2129	8.91971	3.67295	0.189766	0.102686	1.18562	0.0829638	-1.72627	-0.180026	-0.034555
																			18.1701	8.94041	3.79121	-0.0483674	-0.0939372	0.543375	0.0201311	-1.49861	-0.448182	-0.035918
																			17.8983	7.74142	3.94941	-0.288391	0.205675	0.539273	-0.0759831	-1.06071	-0.0773727	-0.0350142
																			18.0021	7.7646	4.14112	-0.417558	-0.410675	0.0959574	-0.026697	0.0803509	-0.185856	-0.0391256
																			19.9175	7.84273	4.31868	-0.367234	-0.363551	-0.395882	-0.0266223	1.88916	0.035333	-0.0150793
																			21.6908	7.93091	4.5385	-0.244747	-0.351507	-0.715078	-0.0265722	3.5331	0.0318556	-0.00564877
																			22.8334	7.69758	4.71292	-0.00579495	-0.014265	-0.808083	-0.0757554	4.37551	-0.0462197	-0.00244733
																			22.0447	7.56492	4.81441	0.0194052	0.0658717	-1.12643	-0.0426309	3.78097	-0.02184	-0.00996825
																			20.9021	7.5508	4.79817	0.494333	-0.0955876	-0.458342	-0.0425781	1.70457	-0.101072	0.0518258
																			21.3649	7.88663	4.08366	0.954587	-0.00415903	2.12379	0.0610578	-1.4246	0.443914	0.239995
																			21.2106	8.32601	3.08349	1.06497	-0.0812233	3.94407	0.0306459	-2.94649	0.622459	0.166626
																			19.5399	8.60712	3.07437	0.687403	0.141203	2.51153	0.0837136	-2.90867	0.313207	0.0300656
																			17.1313	8.74306	3.14017	0.146165	0.0364912	0.440513	0.0837535	-2.33896	-0.0732995	-0.0465491
																			16.6685	8.81299	3.21692	-0.0659435	-0.133422	-0.148327	0.0209208	-1.63697	-0.351808	-0.0457997
																			16.8892	7.64462	3.34665	-0.296768	0.198834	-0.121782	-0.0751934	-0.772289	0.00396071	-0.0387739
																			17.5274	7.683	3.51737	-0.411939	-0.395824	-0.447047	-0.0259072	0.782996	-0.140688	-0.0345004
																			20.1519	7.80155	3.78513	-0.315867	-0.359118	-0.683543	-0.0258325	2.86839	0.0814595	-0.000210956
																			22.0489	7.88133	4.02075	-0.205331	-0.32128	-0.9253	-0.0257823	4.58593	0.0555195	-0.0169603
																			23.0603	7.62425	4.20853	-0.00614338	0.0171735	-1.11781	-0.0749655	5.46188	-0.0279304	-0.0246344
																			22.1192	7.46891	4.33286	-0.00354163	0.115794	-1.59146	-0.041841	4.90102	-0.0305838	-0.0319174
																			20.7104	7.42536	4.32142	0.430536	-0.019556	-1.08725	-0.0417877	2.80684	-0.154583	0.0294353
																			20.6707	7.63541	3.59619	0.862736	0.0985587	1.3761	0.0618482	-0.51587	0.338304	0.217437
																			20.0012	7.96032	2.60009	0.962193	0.0182095	3.09812	0.031436	-2.31922	0.50455	0.145485
																			17.5773	8.11878	2.57148	0.551156	0.24167	1.51371	0.0845033	-2.67452	0.174309	-0.00374265
																			14.229	8.12019	2.63814	-0.0344186	0.150517	-0.807663	0.0845429	-2.60016	-0.239392	-0.0827886
																			13.1015	8.04337	2.71644	-0.288453	-0.0160026	-1.5787	0.0217102	-2.17348	-0.532763	-0.0906091
																			12.6663	6.71857	2.83628	-0.573388	0.307719	-1.78342	-0.0744042	-1.48688	-0.185376	-0.0927839
																			12.7596	6.62951	2.9866	-0.713904	-0.309418	-2.26907	-0.025118	-0.136165	-0.317599	-0.0852219
																			14.7746	6.59104	3.21095	-0.676827	-0.251272	-2.74335	-0.0250431	1.867	-0.130217	-0.0676774
																			16.8067	6.57575	3.49182	-0.525112	-0.250289	-2.89299	-0.0249928	3.57722	-0.0951437	-0.0495597
																			17.931	6.22417	3.70864	-0.275669	0.0878557	-2.97933	-0.074178	4.45448	-0.165287	-0.0497036
																			17.1045	5.97406	3.85004	-0.241869	0.192712	-3.28539	-0.0410556	3.8662	-0.152509	-0.0576808
																			15.9241	5.84214	3.88188	0.232468	0.0505844	-2.58046	-0.0410037	1.7924	-0.258207	0.00431439
																			16.2932	6.02201	3.20668	0.690557	0.158248	0.0707457	0.0626322	-1.37662	0.266563	0.1924
																			15.8798	6.30503	2.25573	0.79117	0.0834769	1.91696	0.0322196	-3.04084	0.418205	0.117798
																			13.7247	6.41626	2.2713	0.3767	0.309875	0.434122	0.0852866	-3.2348	0.0918979	-0.0260055
																			10.5259	6.3672	2.35311	-0.222073	0.209826	-1.79257	0.0853258	-3.05742	-0.312613	-0.104915
																			9.41565	6.25299	2.42091	-0.466195	0.0296844	-2.4146	0.0224931	-2.73231	-0.588825	-0.108517
																			8.95441	4.91592	2.5303	-0.720232	0.349247	-2.44384	-0.0736209	-2.27322	-0.225157	-0.104986
																			9.03484	4.80234	2.67406	-0.834621	-0.252973	-2.77112	-0.0243347	-1.12008	-0.338762	-0.0996616
																			11.0724	4.76891	2.82672	-0.778556	-0.219868	-3.08992	-0.0242612	0.780208	-0.106503	-0.0843192
																			12.8197	4.73587	3.01167	-0.659715	-0.201394	-3.32467	-0.0242123	2.46509	-0.108144	-0.0747932
																			13.8471	4.38607	3.15816	-0.429087	0.124171	-3.38833	-0.0734029	3.32599	-0.182011	-0.0744228
																			12.9119	4.13572	3.24053	-0.408625	0.216521	-3.73505	-0.0402859	2.75781	-0.172955	-0.0817413
																			11.5085	3.99789	3.19452	0.0465359	0.0690955	-3.10658	-0.0402375	0.653632	-0.285843	-0.020446
																			11.6937	4.17427	2.45191	0.494905	0.172632	-0.524152	0.0633984	-2.54407	0.236939	0.167827
																			11.1274	4.45198	1.42572	0.590662	0.0971834	1.27408	0.0328384	-4.22719	0.388567	0.0935652
																			8.73794	4.548	1.37582	0.177553	0.336846	-0.256178	0.085758	-4.5204	0.0403441	-0.0497868
																			5.50416	4.48339	1.40239	-0.400908	0.240407	-2.44794	0.0856498	-4.36181	-0.36841	-0.128623
																			4.52823	4.38401	1.43685	-0.631847	0.0413191	-3.03762	0.0228171	-3.91683	-0.638368	-0.132113
																			4.29837	3.04761	1.51882	-0.886204	0.34513	-3.0525	-0.0733619	-3.18614	-0.283319	-0.131669
																			4.55077	2.94339	1.62889	-1.0085	-0.283153	-3.38516	-0.0241405	-1.81454	-0.382174	-0.123835
																			6.77909	2.92372	1.77719	-0.918262	-0.256295	-3.66213	-0.0249524	0.171843	-0.142279	-0.0897491
																			8.65947	2.92036	1.9275	-0.766278	-0.256231	-3.79741	-0.0257225	1.86752	-0.136508	-0.0737709
																			9.71421	2.58259	2.03006	-0.517771	0.0658504	-3.81072	-0.0759362	2.73237	-0.217918	-0.074312
																			8.74876	2.34104	2.06506	-0.494354	0.15394	-4.12679	-0.0438422	2.14603	-0.210371	-0.0819321
																			7.40179	2.21497	1.97429	-0.0340202	0.00151498	-3.44576	-0.0442139	0.0570609	-0.301868	-0.0201842
																			7.52662	2.40792	1.1811	0.414193	0.0997768	-0.841192	0.059422	-3.17783	0.215372	0.167831
																			6.95246	2.70449	0.100533	0.51507	0.0269353	0.981382	0.0287477	-4.87724	0.378095	0.0944285
																			4.79884	2.83767	-0.000274857	0.116304	0.24673	-0.466392	0.0815529	-5.03258	0.0636551	-0.0478379
																			1.93888	2.83127	-0.0136921	-0.438094	0.138623	-2.56253	0.0813304	-4.65565	-0.317585	-0.124837
																			1.19409	2.76158	-0.00973976	-0.654285	-0.0282983	-3.13944	0.0184977	-4.03155	-0.595888	-0.126804
																			1.18725	1.45417	0.0461843	-0.897472	0.296163	-3.13744	-0.0779591	-3.12304	-0.248836	-0.124526
																			1.62111	1.37652	0.151167	-1.01366	-0.315144	-3.5065	-0.0290156	-1.52489	-0.400547	-0.116828
																			3.80758	1.32421	0.390781	-0.956815	-0.235257	-3.91676	-0.0290351	0.573056	-0.250132	-0.0924667
																			5.68816	1.25998	0.640611	-0.815718	-0.196184	-4.13494	-0.0287355	2.29608	-0.258567	-0.0743603
																			6.94927	0.890814	0.84202	-0.547327	0.122894	-4.08395	-0.0778652	3.17725	-0.301768	-0.0727927
																			6.23243	0.618058	0.972507	-0.501817	0.211972	-4.29518	-0.0446872	2.62279	-0.270932	-0.0802805
																			5.05724	0.460572	0.973896	-0.0239078	0.0618077	-3.51625	-0.0448816	0.541309	-0.376383	-0.0189147
																			5.40587	0.601743	0.271151	0.437647	0.1707	-0.795093	0.0587543	-2.66743	0.159185	0.169218
																			5.02856	0.852028	-0.704953	0.548259	0.0877041	1.15295	0.028596	-4.36019	0.328551	0.0956134
																			3.09027	0.956361	-0.689107	0.168172	0.30647	-0.177676	0.0819173	-4.55284	0.0344696	-0.0374731
																			0.436816	0.931532	-0.583895	-0.371015	0.199404	-2.17418	0.0822108	-4.1982	-0.338183	-0.110867
																			-0.0602637	0.869221	-0.471163	-0.568728	0.0134017	-2.62877	0.0193781	-3.5831	-0.600484	-0.110023
																			0.217546	-0.408097	-0.300796	-0.788369	0.318979	-2.50896	-0.0765558	-2.6699	-0.242462	-0.10627
																			0.940604	-0.470345	-0.0945432	-0.888193	-0.285837	-2.75708	-0.0270894	-1.07475	-0.362703	-0.098816
																			3.65965	-0.429471	0.140763	-0.767534	-0.264624	-2.85576	-0.026191	1.00255	-0.085177	-0.0548709
																			6.07098	-0.365086	0.420999	-0.567179	-0.277292	-2.754	-0.0254933	2.72146	-0.043429	-0.0389512
																			7.46095	-0.636733	0.643015	-0.295779	0.0502	-2.68459	-0.0737426	3.60307	-0.105769	-0.0386592
																			6.90414	-0.81169	0.798293	-0.247293	0.139926	-2.8663	-0.0396841	3.04887	-0.0718552	-0.0460838
																			5.9392	-0.876118	0.835252	0.23102	-0.00658901	-2.06446	-0.0391251	1.00172	-0.158054	0.0155861
																			6.50011	-0.598615	0.166003	0.691237	0.0891738	0.673775	0.0645108	-2.15503	0.365351	0.203709
																			6.48144	-0.216169	-0.783396	0.806521	0.00874726	2.66536	0.0341288	-3.71008	0.544647	0.131666
																			4.69199	-0.00673316	-0.777336	0.405532	0.241672	1.34054	0.0872265	-3.78962	0.212644	-0.0219293
																			1.64306	0.0174288	-0.701314	-0.192206	0.162674	-0.802336	0.0872963	-3.60913	-0.214806	-0.10455
																			0.63587	-0.0225638	-0.625422	-0.455165	-0.00637951	-1.42054	0.0244636	-3.24474	-0.503964	-0.1098
																			0.351127	-1.28133	-0.510423	-0.724123	0.308405	-1.4145	-0.0716743	-2.70202	-0.145451	-0.107744
																			0.578704	-1.30677	-0.356613	-0.856299	-0.309243	-1.75217	-0.0224119	-1.44837	-0.265741	-0.103664
																			2.62541	-1.31879	-0.112255	-0.822667	-0.245105	-2.20024	-0.0222557	0.53058	-0.0946652	-0.089157
																			4.45426	-1.33624	0.180179	-0.714312	-0.224849	-2.49533	-0.0220697	2.25648	-0.112655	-0.0769207
																			5.46872	-1.69925	0.414275	-0.495917	0.129367	-2.64944	-0.0711501	3.1464	-0.226784	-0.0787328
																			4.63773	-1.95547	0.591208	-0.47878	0.224924	-3.02318	-0.0379228	2.61677	-0.214716	-0.0850724
																			3.38039	-2.09656	0.640939	-0.0165207	0.0769079	-2.41378	-0.0377636	0.580544	-0.329764	-0.0235715
																			3.64073	-1.95032	-0.00902295	0.433162	0.186168	0.131139	0.0658723	-2.57616	0.195282	0.164642
																			3.29371	-1.6919	-0.928774	0.540136	0.10266	1.92418	0.035765	-4.15249	0.373418	0.0907279
																			1.51475	-1.57648	-0.856285	0.163089	0.312604	0.469597	0.0891373	-4.127	0.0859481	-0.045839
																			-0.853286	-1.56717	-0.694961	-0.354278	0.183347	-1.58119	0.0894818	-3.55611	-0.256516	-0.115919
																			-1.03757	-1.59216	-0.52876	-0.530712	-0.015126	-2.0731	0.0266491	-2.68962	-0.516744	-0.118001
																			-0.560077	-2.84554	-0.307611	-0.741869	0.288804	-2.00524	-0.0692283	-1.61141	-0.153374	-0.114604
																			0.362734	-2.87971	-0.0515617	-0.83354	-0.321347	-2.29434	-0.0197054	0.129581	-0.264334	-0.102297
																			3.29172	-2.79283	0.251539	-0.684335	-0.307158	-2.37947	-0.0192171	2.26952	0.00665656	-0.0529823
																			5.7233	-2.73832	0.565835	-0.482935	-0.281285	-2.3085	-0.0189898	4.00122	0.0227439	-0.0364795
																			7.26765	-3.00541	0.825146	-0.196274	0.0343483	-2.15463	-0.0677527	4.89101	-0.0233374	-0.0354519
																			6.69758	-3.18433	1.00992	-0.148686	0.132662	-2.33382	-0.0342078	4.31556	-0.0154726	-0.0440468
																			5.69432	-3.24735	1.07052	0.319441	-0.0115283	-1.52175	-0.0336738	2.22097	-0.119909	0.017594
																			6.15504	-2.9952	0.412582	0.771926	0.0948927	1.23009	0.0699621	-1.02327	0.388518	0.205512
																			5.88434	-2.64339	-0.527702	0.869301	0.0218299	3.19228	0.0394303	-2.73838	0.538676	0.132264
																			3.60409	-2.49986	-0.498767	0.436668	0.275921	1.77231	0.092378	-3.12081	0.163308	-0.0170903
																			0.384599	-2.53301	-0.394328	-0.18608	0.186036	-0.377098	0.092298	-3.02004	-0.28008	-0.103147
																			-0.634477	-2.62628	-0.291091	-0.456487	0.0121264	-0.974702	0.0294653	-2.65279	-0.568206	-0.106541
																			-1.02541	-3.9569	-0.151427	-0.728853	0.342733	-0.98557	-0.0667114	-2.16656	-0.210902	-0.101225
																			-0.932066	-4.05478	0.0285571	-0.855866	-0.265301	-1.2644	-0.0174877	-1.06793	-0.336356	-0.0985289
																			1.13938	-4.0834	0.222919	-0.818727	-0.20006	-1.56346	-0.0176353	0.824359	-0.143427	-0.0812021
																			3.27543	-4.0489	0.400087	-0.657601	-0.20711	-1.56241	-0.0177428	2.51097	-0.0813169	-0.0605448
																			4.6331	-4.31843	0.534873	-0.380686	0.11035	-1.44831	-0.067205	3.37444	-0.115735	-0.056193
																			3.91738	-4.48944	0.599822	-0.337352	0.197749	-1.66654	-0.0343594	2.79798	-0.0867909	-0.0636555
																			2.85889	-4.54368	0.546922	0.147213	0.0461805	-0.875812	-0.0345936	0.738098	-0.163756	-0.0016708
																			3.54388	-4.21515	-0.196915	0.629678	0.127687	1.88066	0.0690423	-2.32852	0.389073	0.188326
																			3.37113	-3.79383	-1.20345	0.743795	0.0584199	3.81539	0.0385387	-3.94626	0.545004	0.113523
																			1.60558	-3.51335	-1.24247	0.369407	0.266292	2.5079	0.0915146	-4.11185	0.260389	-0.0222376
																			-0.827289	-3.35893	-1.18461	-0.152117	0.153036	0.531722	0.0914629	-3.72293	-0.0944452	-0.090491
																			-1.14211	-3.24538	-1.13332	-0.320811	-0.0231832	0.166318	0.0286301	-3.1703	-0.356846	-0.0872254
																			-0.867562	-4.36492	-1.02653	-0.530746	0.292467	0.340746	-0.0675211	-2.4347	0.00839237	-0.0847499
																			-0.104077	-4.24919	-0.896621	-0.606812	-0.329115	0.19806	-0.0182719	-1.04181	-0.0916658	-0.0686404
																			2.55374	-4.05913	-0.69978	-0.494522	-0.306953	0.0915063	-0.0185713	0.945153	0.140487	-0.0444514
																			4.60228	-3.89453	-0.484387	-0.364851	-0.285739	-0.0741173	-0.0188622	2.64943	0.110635	-0.0353077
																			5.81179	-4.06811	-0.32203	-0.144709	0.052806	-0.126127	-0.0685119	3.51762	0.0113414	-0.0404736
																			5.08752	-4.13888	-0.227535	-0.129297	0.145028	-0.444348	-0.0358537	2.95031	0.0161149	-0.048011
																			3.83235	-4.10716	-0.268058	0.315312	0.000902259	0.184946	-0.0360451	0.837915	-0.108639	0.0131566
																			3.92584	-3.81301	-1.02089	0.738835	0.122639	2.73325	0.0675908	-2.49246	0.390523	0.199355
																			3.5342	-3.40176	-2.07952	0.843953	0.0331212	4.58351	0.0375859	-4.18029	0.568574	0.128995
																			1.33242	-3.17602	-2.16639	0.416435	0.267244	3.03251	0.0910606	-4.31863	0.20842	-0.0222358
																			-2.10661	-3.14962	-2.1933	-0.209622	0.196681	0.688391	0.0915075	-4.17603	-0.245193	-0.109452
																			-3.26882	-3.17851	-2.20501	-0.479257	-0.00569059	-0.0488821	0.0286748	-3.73896	-0.526846	-0.114353
																			-3.57975	-4.43398	-2.17345	-0.756631	0.30091	-0.181359	-0.067327	-2.97067	-0.183732	-0.113499
																			-3.3423	-4.4499	-2.12011	-0.875546	-0.318548	-0.553819	-0.0179284	-1.6094	-0.294766	-0.10227
																			-1.20368	-4.40115	-2.05203	-0.813539	-0.266537	-0.877771	-0.0162588	0.388508	-0.0894586	-0.0754124
																			0.853907	-4.32071	-1.93489	-0.649455	-0.267293	-0.932603	-0.0147241	2.08949	-0.0607605	-0.0551183
																			2.03529	-4.5619	-1.86132	-0.387079	0.0607318	-0.943543	-0.0619657	2.97154	-0.127829	-0.0533076
																			1.26099	-4.70529	-1.85319	-0.34581	0.158478	-1.2225	-0.0268997	2.42512	-0.108171	-0.0607171
																			0.11018	-4.73755	-1.96479	0.131501	0.0177915	-0.50493	-0.0257751	0.399918	-0.206953	0.000988575
																			0.571651	-4.45093	-2.77371	0.598959	0.1261	2.1745	0.0778608	-2.71242	0.341011	0.190293
																			0.308894	-4.0637	-3.83734	0.706943	0.0453692	4.06026	0.047253	-4.28046	0.515804	0.114774
																			-1.50931	-3.8371	-3.91468	0.322601	0.27346	2.67078	0.100125	-4.29973	0.202389	-0.0271427
																			-4.02009	-3.74578	-3.90026	-0.22745	0.159196	0.621225	0.0999687	-3.7408	-0.18203	-0.104177
																			-4.29867	-3.69322	-3.87516	-0.430446	-0.0220333	0.122738	0.0371359	-2.87876	-0.453672	-0.105262
																			-3.85814	-4.87278	-3.79871	-0.652554	0.293305	0.210528	-0.0591343	-1.77887	-0.09894	-0.100978
																			-3.07018	-4.86142	-3.65153	-0.78394	-0.298941	-0.206097	-0.0100043	0.104748	-0.257804	-0.105183
																			-0.500241	-4.81769	-3.3492	-0.710375	-0.236184	-0.68658	-0.0104678	2.4398	-0.0655498	-0.0639723
																			1.67965	-4.79461	-3.00875	-0.538879	-0.195083	-0.852019	-0.0107998	4.21141	-0.0882616	-0.0433634
																			3.11219	-5.0911	-2.72314	-0.256378	0.129428	-0.806064	-0.060576	5.1165	-0.15627	-0.0401921
																			2.49785	-5.29462	-2.50588	-0.206947	0.22414	-1.06609	-0.0280444	4.56659	-0.143651	-0.0476221
																			1.469	-5.38242	-2.40557	0.26925	0.0748958	-0.34483	-0.028354	2.51552	-0.243374	0.0139155
																			1.87716	-5.16409	-3.01844	0.720273	0.182362	2.2811	0.0752819	-0.660974	0.26086	0.200786
																			1.38236	-4.8498	-3.9123	0.806602	0.116113	4.08782	0.0443339	-2.42796	0.391332	0.126217
																			-0.757131	-4.71088	-3.82427	0.395528	0.34105	2.61879	0.0968655	-2.72375	0.0622851	-0.0127318
																			-3.72207	-4.72706	-3.65641	-0.172864	0.245078	0.478908	0.0963693	-2.56286	-0.334168	-0.0890948
																			-4.81534	-4.84056	-3.48652	-0.425367	0.0942586	-0.209182	0.0335366	-2.26162	-0.624482	-0.0954179
																			-5.04176	-6.17551	-3.2535	-0.682583	0.413004	-0.233687	-0.062754	-1.69207	-0.261697	-0.0929522
																			-4.636	-6.27725	-2.98285	-0.801486	-0.204859	-0.56785	-0.0136442	-0.311834	-0.388469	-0.0877353
																			-2.09925	-6.29047	-2.64018	-0.709711	-0.175789	-0.833231	-0.0155966	1.7522	-0.139325	-0.0471136
																			0.757348	-6.22009	-2.29212	-0.41055	-0.215285	-0.593807	-0.0174306	3.51457	-0.0195787	0.0116839
																			2.40399	-6.47542	-1.99438	-0.0587407	0.0838926	-0.458563	-0.0690575	4.41562	-0.0526969	0.0133655
																			1.9613	-6.63153	-1.76609	0.035241	0.155789	-0.674946	-0.0383766	3.8877	-0.0125335	0.006085
																			1.01962	-6.67586	-1.67242	0.537756	-0.00409314	0.0761908	-0.0397425	1.83303	-0.102886	0.0676592
																			1.47745	-6.39451	-2.2909	1.00834	0.0910001	2.74016	0.0638934	-1.40867	0.412271	0.255851
																			1.30708	-6.01103	-3.20105	1.12211	0.0102369	4.65217	0.0337225	-3.07335	0.591909	0.182342
																			-0.512078	-5.79348	-3.13396	0.733127	0.231961	3.27822	0.0870311	-3.24783	0.294472	0.0383771
																			-3.13257	-5.71831	-2.98138	0.173849	0.122221	1.18977	0.087312	-2.88534	-0.0811628	-0.0395518
																			-3.51819	-5.68404	-2.83055	-0.0362482	-0.0841062	0.689743	0.0244793	-2.22021	-0.336258	-0.0410149
																			-3.37761	-6.8835	-2.65027	-0.276676	0.230615	0.700065	-0.0715301	-1.41453	0.027088	-0.0388759
																			-2.85599	-6.85277	-2.44242	-0.382913	-0.379836	0.409379	-0.0221391	-0.0952303	-0.063038	-0.0270329
																			-0.514872	-6.74183	-2.21421	-0.304744	-0.34246	0.211095	-0.0213724	1.75713	0.154958	-0.0134593
																			1.06005	-6.68902	-1.9638	-0.282299	-0.301547	-0.173393	-0.0206894	3.43315	0.0917791	-0.0341477
																			2.31061	-6.94203	-1.77564	-0.0821998	0.0145019	-0.156856	-0.069026	4.29559	0.0558983	-0.0296405
																			1.55377	-7.10427	-1.65043	-0.0811944	0.107289	-0.445465	-0.0350548	3.716	0.0840543	-0.0371626
																			0.429118	-7.1545	-1.64187	0.376717	-0.0416111	0.257585	-0.0344548	1.65628	-0.0135126	0.0244766
																			0.842744	-6.88491	-2.33595	0.825394	0.0620116	2.88895	0.0691811	-1.50757	0.513089	0.212536
																			0.592758	-6.50749	-3.31076	0.932175	-0.0176667	4.75501	0.0387426	-3.11986	0.68317	0.139421
																			-1.54348	-6.30086	-3.32256	0.513155	0.212026	3.2301	0.0917835	-3.29918	0.339811	-0.00777667
																			-4.62126	-6.2532	-3.24398	-0.0827511	0.118929	0.975272	0.0917967	-3.06758	-0.0737559	-0.08604
																			-5.47842	-6.25195	-3.16626	-0.315604	-0.060874	0.348637	0.028964	-2.62113	-0.35336	-0.0868738
																			-5.55773	-7.47477	-3.03583	-0.563525	0.247276	0.307521	-0.0671993	-1.88466	-0.000692033	-0.0858507
																			-5.22605	-7.4855	-2.86355	-0.691415	-0.356535	-0.158174	-0.0179623	-0.426528	-0.143012	-0.0833761
																			-3.04027	-7.4663	-2.61658	-0.635892	-0.288282	-0.653358	-0.0179333	1.64671	0.0491669	-0.0577829
																			-1.18094	-7.45552	-2.35224	-0.501162	-0.255709	-0.964814	-0.0178563	3.37755	0.0363708	-0.0475644
																			0.0904414	-7.76065	-2.13293	-0.243844	0.0804995	-0.984071	-0.0670312	4.26702	-0.0265345	-0.0419927
																			-0.590146	-7.9564	-1.98333	-0.202937	0.170562	-1.24851	-0.0338983	3.72333	-0.00964648	-0.0492831
																			-1.77394	-8.03631	-1.96069	0.263816	0.0208161	-0.574125	-0.0338587	1.64994	-0.115753	0.0122475
																			-1.35085	-7.80634	-2.63666	0.721082	0.121749	2.05788	0.0697772	-1.50127	0.422225	0.200694
																			-1.63481	-7.47138	-3.58779	0.826569	0.0449554	3.90543	0.039141	-3.10875	0.590011	0.126971
																			-3.42552	-7.28147	-3.56303	0.453272	0.255724	2.52437	0.0919843	-3.20293	0.305232	-0.00868475
																			-6.00271	-7.22049	-3.46973	-0.0749765	0.140734	0.502507	0.0917998	-2.82628	-0.0633891	-0.0829348
																			-6.50024	-7.19163	-3.369	-0.271817	-0.0374918	-0.0426496	0.0289671	-2.20009	-0.330494	-0.0860804
																			-6.35287	-8.39351	-3.21624	-0.498191	0.278681	-0.0173126	-0.0673081	-1.39193	0.0337829	-0.080865
																			-5.60878	-8.34762	-3.02621	-0.55994	-0.341948	-0.185322	-0.018183	-0.023679	-0.0466292	-0.0592816
																			-2.87273	-8.19723	-2.80172	-0.424399	-0.317669	-0.227428	-0.0185387	1.93846	0.199672	-0.0239175
																			-0.259247	-8.00648	-2.56599	-0.198561	-0.332927	-0.0293987	-0.0187819	3.62474	0.255619	0.0124842
																			0.942887	-8.18442	-2.39515	0.04238	0.0329962	-0.106858	-0.0684732	4.49232	0.130283	-0.000233345
																			0.230112	-8.26612	-2.29181	0.0683208	0.134089	-0.419918	-0.0358567	3.90241	0.146818	-0.00787042
																			-0.804117	-8.23421	-2.31431	0.538862	-0.00723851	0.310712	-0.036244	1.82401	0.0603164	0.0539435
																			-0.425886	-7.87604	-3.04741	0.989114	0.101406	2.95058	0.0673919	-1.42683	0.574192	0.241675
																			-0.787822	-7.42025	-4.06124	1.08716	0.026361	4.80845	0.0367554	-3.16404	0.730841	0.168098
																			-3.01147	-7.15655	-4.10405	0.662019	0.267245	3.30441	0.0895985	-3.47297	0.380989	0.017823
																			-5.98113	-7.04371	-4.04989	0.0747459	0.165677	1.12414	0.0894138	-3.27447	-0.0106195	-0.0564596
																			-6.64901	-6.97605	-3.9888	-0.156354	-0.0256865	0.550926	0.0265811	-2.74181	-0.278114	-0.0597042
																			-6.5567	-8.13995	-3.88058	-0.398675	0.275705	0.611404	-0.0696703	-1.98911	0.0905398	-0.0563559
																			-6.12708	-8.08696	-3.73761	-0.540205	-0.34667	0.210144	-0.0205214	-0.491111	-0.0547352	-0.0594065
																			-3.88954	-7.98644	-3.52648	-0.490565	-0.301181	-0.238753	-0.0211339	1.55937	0.148344	-0.0326884
																			-2.16754	-7.92811	-3.23832	-0.403829	-0.264076	-0.653979	-0.0216337	3.28544	0.102068	-0.0450684
																			-0.711421	-8.15993	-2.98845	-0.132855	0.0479822	-0.632618	-0.0715924	4.1884	0.0412108	-0.00353483
																			-1.25397	-8.29405	-2.80344	-0.0894403	0.136695	-0.881111	-0.0392431	3.66766	0.0587162	-0.00972505
																			-2.27788	-8.31761	-2.73839	0.387043	-0.0155633	-0.189613	-0.0396949	1.64177	-0.0574696	0.0516616
																			-1.77084	-8.02242	-3.38079	0.845956	0.0906868	2.42871	0.063941	-1.50418	0.467501	0.239759
																			-1.98301	-7.62203	-4.30174	0.953531	0.00898146	4.28379	0.0335388	-3.13974	0.634436	0.166236
																			-3.89175	-7.38167	-4.24208	0.558313	0.232577	2.82009	0.0866161	-3.30735	0.31293	0.0288359
																			-6.39307	-7.2791	-4.10485	0.019538	0.124952	0.775246	0.0866656	-2.9072	-0.0626402	-0.0456876
																			-6.75924	-7.21782	-3.96085	-0.173762	-0.0573464	0.256935	0.0238329	-2.26775	-0.319666	-0.0428355
																			-6.47051	-8.39103	-3.77023	-0.402584	0.270433	0.271636	-0.0722748	-1.37369	0.0377599	-0.0405058
																			-5.65329	-8.33304	-3.53683	-0.504636	-0.336852	-0.0267897	-0.0229823	0.212876	-0.072172	-0.0328429
																			-2.72162	-8.17591	-3.25974	-0.366322	-0.31222	-0.121395	-0.0230113	2.31873	0.19431	0.0239553
																			0.0447972	-7.98882	-2.97736	-0.114258	-0.332539	0.114868	-0.0230683	4.04641	0.26656	0.0530234
																			1.30694	-8.17718	-2.743	0.129813	0.00597127	0.0363357	-0.0723694	4.93191	0.182025	0.0134827
																			0.726607	-8.26553	-2.57424	0.168803	0.0882687	-0.260623	-0.0393631	4.39892	0.204331	0.00607202
																			-0.139028	-8.23795	-2.52338	0.652767	-0.0642289	0.479947	-0.0393357	2.40608	0.118948	0.0681677
																			0.510967	-7.89862	-3.17429	1.11856	0.0333322	3.15001	0.0643002	-0.68506	0.646374	0.256387
																			0.471332	-7.45514	-4.10152	1.23209	-0.0390167	5.05343	0.0338635	-2.24203	0.806711	0.182949
																			-1.46713	-7.18935	-4.07098	0.819869	0.197416	3.60531	0.0869064	-2.40694	0.45762	0.033048
																			-4.59615	-7.0902	-3.95759	0.213493	0.105948	1.34697	0.0869215	-2.28564	0.0341161	-0.0501762
																			-5.53213	-7.0695	-3.83639	-0.0458634	-0.0619448	0.67359	0.0240888	-1.89367	-0.266297	-0.0561238
																			-5.74684	-8.28041	-3.66956	-0.311332	0.256145	0.598935	-0.0720461	-1.30569	0.090115	-0.0529721
																			-5.46438	-8.26437	-3.47976	-0.422208	-0.351749	0.260178	-0.0227806	-0.108377	-0.0351108	-0.0401789
																			-3.35803	-8.19274	-3.24985	-0.371218	-0.304922	-0.117121	-0.0228056	1.77651	0.158919	-0.034769
																			-1.61771	-8.12638	-3.00732	-0.286423	-0.279074	-0.476887	-0.0228335	3.47145	0.141981	-0.0321925
																			-0.543089	-8.38242	-2.83986	-0.0720769	0.0470389	-0.579665	-0.0721349	4.32829	0.0646954	-0.0369171
																			-1.56456	-8.54718	-2.74561	-0.0771052	0.155173	-1.02821	-0.0391285	3.71018	0.0532602	-0.0458934
																			-3.15336	-8.60089	-2.77932	0.341247	0.0160689	-0.537873	-0.0391446	1.50634	-0.074998	0.0152324
																			-3.20672	-8.36603	-3.52327	0.767017	0.129336	1.93281	0.0644913	-1.84113	0.426763	0.203288
																			-3.84313	-8.01683	-4.54893	0.862885	0.0445733	3.64732	0.0340546	-3.59807	0.598615	0.133249
																			-5.78959	-7.81356	-4.58438	0.487196	0.267941	2.15629	0.0870974	-3.68456	0.300973	-0.00659479
																			-8.82463	-7.78347	-4.54479	-0.0902927	0.178926	-0.134838	0.0871126	-3.33274	-0.114452	-0.0901207
																			-9.82679	-7.82505	-4.49948	-0.334416	0.0102299	-0.888192	0.0242798	-2.82798	-0.395036	-0.0911653
																			-10.0082	-9.08858	-4.40887	-0.590383	0.324779	-0.955681	-0.071855	-2.08434	-0.0441254	-0.0891229
																			-9.65854	-9.12008	-4.27485	-0.711822	-0.296141	-1.33604	-0.0225896	-0.656263	-0.156691	-0.0840514
																			-7.35293	-9.07773	-4.11127	-0.635616	-0.252311	-1.62692	-0.0226148	1.35958	0.0672494	-0.0532846
																			-5.36906	-9.03283	-3.94435	-0.481077	-0.227008	-1.74611	-0.0226427	3.05144	0.0702163	-0.036696
																			-4.15909	-9.31386	-3.81675	-0.224965	0.0980975	-1.7186	-0.0719441	3.91576	0.00957497	-0.0363702
																			-4.95503	-9.49913	-3.75669	-0.188696	0.190564	-1.99088	-0.0389378	3.34364	0.0290073	-0.0438755
																			-6.14113	-9.56663	-3.82719	0.284926	0.0446041	-1.25743	-0.0389539	1.26358	-0.0619032	0.0178943
																			-5.76043	-9.29895	-4.59423	0.745326	0.143536	1.41666	0.064682	-1.92332	0.479753	0.206139
																			-6.22631	-8.93661	-5.62158	0.842553	0.0738089	3.27276	0.0342453	-3.64963	0.629165	0.129004
																			-8.72612	-8.76227	-5.68541	0.408923	0.303979	1.73535	0.0872881	-4.08217	0.285288	-0.017046
																			-11.996	-8.73473	-5.67286	-0.17511	0.204292	-0.448085	0.0873032	-4.04027	-0.121315	-0.0951904
																			-13.1454	-8.75586	-5.66322	-0.416454	0.0186216	-1.08358	0.0244705	-3.76467	-0.403859	-0.100794
																			-13.4878	-10.0055	-5.5971	-0.671476	0.331211	-1.14256	-0.0716644	-3.17812	-0.0529513	-0.099569
																			-13.3715	-10.0445	-5.49123	-0.803041	-0.27036	-1.6006	-0.0223989	-1.85726	-0.18655	-0.095606
																			-11.2797	-10.0139	-5.29314	-0.745931	-0.227742	-2.08277	-0.0224241	0.147931	0.0246024	-0.0663451
																			-9.40974	-9.97458	-5.11538	-0.601415	-0.21621	-2.31298	-0.022452	1.85387	0.0304585	-0.0510149
																			-8.22425	-10.2575	-4.98512	-0.339643	0.124393	-2.34055	-0.0717534	2.72998	-0.0409776	-0.0430553
																			-8.85507	-10.4301	-4.91864	-0.286995	0.207054	-2.54559	-0.0387471	2.21156	-0.0048732	-0.0486657
																			-9.89586	-10.4929	-4.96776	0.196398	0.0557276	-1.79468	-0.0387633	0.236404	-0.103123	0.0129133
																			-9.43165	-10.251	-5.73115	0.657075	0.164871	0.90008	0.0648726	-2.86452	0.427294	0.200854

## Sheet: Ganges
Date	Year	Month	TWS_anom	TWS-GRACE	TWS		Aqf_Storage	glVolume	grdWater	irrRffStorage	resStorage	ricePaddyStrg	snowPack	soilMoist	surfRffStorage	UGW	smResStrg	endoStrg		precip	discharge	evapotrans	runoff	baseflow	surfRunoff	glMelt	irrigationGross	domUseGross	indUseGross	stkUseGross
1990-01-15	1990	1	9.79301		3475.12		3412.27	52.2006	0.70873	1.15339	5.31823	0.269755	0.434191	2.74787	0.0145555	0	0	0		0.703414	1.41766	1.97721	3.57869	0.351327	3.22736	0	6.33827	0.106824	0.0410769	0.0131431
1990-02-15	1990	2	9.62408		3474.95		3411.96	52.2881	0.569563	0.707236	4.84771	0.269908	0.948618	3.32276	0.0290994	0	0	0		6.03223	0.649047	3.24561	3.09036	0.256322	2.83403	0	2.69814	0.096486	0.0371017	0.0121114
1990-03-15	1990	3	9.4326		3474.76		3411.65	52.3733	0.480347	0.68698	4.18585	0.269908	1.58207	3.49659	0.0307025	0	0	0		2.97827	0.839845	3.36517	3.03247	0.232445	2.80003	0	5.29696	0.106824	0.0410769	0.0141304
1990-04-15	1990	4	7.91061		3473.23		3410.98	52.4093	0.481712	0.888477	3.10826	0.01433	2.01072	3.32036	0.0198428	0	0	0		1.87715	0.564922	2.24436	2.17856	0.245287	1.93327	6.69909e-05	2.39935	0.103378	0.0397518	0.0149367
1990-05-15	1990	5	8.20112		3473.52		3410.44	52.4453	0.741787	0.994696	3.00373	0.124226	1.58227	4.10196	0.0921096	0	0	0		7.09561	1.11341	4.42251	4.27727	0.384426	3.89285	0.00743773	4.59448	0.106824	0.0410769	0.0158491
1990-06-15	1990	6	11.3183		3476.64		3410.76	52.3339	1.99401	0.922276	4.53856	0.150677	0.567972	4.80002	0.570303	0	0	0		19.2963	3.00724	5.44322	8.15141	1.0343	7.11711	0.191394	2.07534	0.103378	0.0397518	0.0154767
1990-07-15	1990	7	31.0985		3496.42		3414.4	52.0332	5.93964	0.264494	12.9355	0.323435	0.0401929	7.73559	2.74986	0	0	0		42.797	15.7329	9.7597	18.5866	3.21751	15.3691	0.49989	1.63586	0.106824	0.0410769	0.0153208
1990-08-15	1990	8	37.4513		3502.77		3417.12	51.7647	7.25124	0.16218	15.1781	0.212684	0.00658108	9.0625	2.01663	0	0	0		29.1546	17.6374	11.4294	15.9756	3.94412	12.0315	0.42013	2.45328	0.106824	0.0410769	0.01538
1990-09-15	1990	9	34.6053		3499.93		3417.76	51.7012	6.63594	0.206361	13.5447	0.318947	0.00596649	8.92695	0.833347	0	0	0		24.3367	14.1091	10.9006	11.4687	3.48187	7.98682	0.147727	1.65541	0.103378	0.0397518	0.0146865
1990-10-15	1990	10	25.2652		3490.59		3417.55	51.7192	4.47468	0.44685	9.52313	0.318947	0.0623894	6.41196	0.0787401	0	0	0		3.24578	9.78239	7.25062	5.07428	2.41098	2.66329	0.000686673	5.75505	0.106824	0.0410769	0.0146546
1990-11-15	1990	11	17.9883		3483.31		3416.54	51.7352	3.09336	0.93839	7.36641	0.177708	0.190219	3.25997	0.013603	0	0	0		0.435784	2.2471	1.72214	3.05904	1.61069	1.44835	1.6652e-05	1.57633	0.103378	0.0397518	0.0134625
1990-12-15	1990	12	15.09		3480.41		3415.54	51.7954	1.73168	1.03166	6.93773	0.0989198	0.337802	2.9294	0.0153322	0	0	0		1.55925	2.36349	1.64846	3.42277	0.927022	2.49574	0	3.82584	0.106824	0.0410769	0.0131046
1991-01-15	1991	1	13.5732		3478.9		3414.68	51.8142	0.921388	0.961173	5.87913	0.271545	0.932946	3.42376	0.0148356	0	0	0		1.37577	1.80982	2.3209	3.40511	0.468242	2.93687	0	5.9277	0.107488	0.0407895	0.0127515
1991-02-15	1991	2	11.3913		3476.71		3414.16	51.8716	0.602562	0.927537	4.66018	0.271575	1.18896	3.01445	0.019478	0	0	0		2.2816	0.710715	2.60777	3.20525	0.27005	2.9352	0	3.92586	0.0970861	0.0368421	0.0123217
1991-03-15	1991	3	10.8931		3476.22		3413.77	51.9384	0.437214	0.779535	3.97339	0.271575	1.68728	3.34508	0.018456	0	0	0		2.87976	0.408944	3.64929	3.11945	0.20823	2.91122	1.13019e-07	5.74799	0.107488	0.0407895	0.0145077
1991-04-15	1991	4	9.47141		3474.79		3412.94	52.0028	0.432059	0.903404	3.14892	0.0143638	1.99453	3.34235	0.0208513	0	0	0		1.93028	0.441023	2.16654	2.19073	0.218753	1.97197	8.19203e-05	2.27889	0.104021	0.0394737	0.0149121
1991-05-15	1991	5	7.95952		3473.28		3411.96	52.0437	0.441404	1.21733	2.10808	0.12658	1.83564	3.52008	0.0338743	0	0	0		3.09461	0.476891	3.57674	3.35994	0.219147	3.14079	0.00369551	5.73448	0.107488	0.0407895	0.0161814
1991-06-15	1991	6	10.6493		3475.97		3411.86	52.0177	1.38846	0.990831	3.75185	0.153266	1.02332	4.47719	0.307906	0	0	0		12.801	2.42876	5.22528	6.23426	0.715463	5.5188	0.100378	2.44383	0.104021	0.0394737	0.0155247
1991-07-15	1991	7	16.9213		3482.24		3412.24	51.7335	2.93832	0.972619	6.74982	0.328159	0.212851	6.0832	0.9877	0	0	0		26.0758	5.98528	10.12	11.5459	1.57036	9.97554	0.41942	6.38325	0.107488	0.0407895	0.0157855
1991-08-15	1991	8	28.2742		3493.6		3414.62	51.4733	4.61752	0.252118	12.1197	0.214858	0.0187682	8.80898	1.47394	0	0	0		34.1514	12.9814	11.0405	14.2562	2.49786	11.7584	0.426428	1.23851	0.107488	0.0407895	0.0153555
1991-09-15	1991	9	30.0254		3495.35		3416.31	51.4391	5.83262	0.366564	12.6947	0.32314	0.00884506	7.44955	0.92154	0	0	0		14.7722	14.574	10.4519	10.2815	3.03917	7.24229	0.102453	4.76664	0.104021	0.0394737	0.0147759
1991-10-15	1991	10	17.4203		3482.74		3415.42	51.4502	2.94513	0.951702	7.42943	0.32314	0.0374706	4.15503	0.0364539	0	0	0		1.4727	4.00841	4.93597	5.15584	1.56709	3.58875	0.00126756	6.38454	0.107488	0.0407895	0.0147424
1991-11-15	1991	11	13.4713		3478.79		3414.65	51.4648	2.05859	0.898431	6.62131	0.180356	0.198676	2.70544	0.0140202	0	0	0		0.501145	1.76424	1.23205	2.51197	1.06391	1.44807	2.62495e-06	1.68013	0.104021	0.0394737	0.0132792
1991-12-15	1991	12	11.7276		3477.05		3413.6	51.5028	1.13386	1.08643	6.33014	0.099018	0.354945	2.93076	0.0148944	0	0	0		2.10238	1.83248	1.7199	3.23368	0.603264	2.63042	0	3.84642	0.107488	0.0407895	0.0130801
1992-01-15	1992	1	10.1168		3475.44		3412.73	51.5195	0.622618	1.00731	5.27911	0.273843	0.752876	3.23893	0.0168067	0	0	0		1.9572	1.57858	2.35583	3.43926	0.30587	3.13339	0	6.04013	0.108515	0.0406311	0.0129456
1992-02-15	1992	2	9.48663		3474.81		3412.38	51.5626	0.505708	0.776828	4.62746	0.27392	1.37677	3.28791	0.0179067	0	0	0		1.58543	0.627184	2.43588	2.85031	0.230555	2.61976	0	4.04475	0.101514	0.0380097	0.0124056
1992-03-15	1992	3	7.47585		3472.8		3411.81	51.6381	0.344938	0.949857	3.09699	0.27392	1.61601	3.04943	0.0194535	0	0	0		1.45208	0.424225	3.05079	3.37773	0.156189	3.22154	2.40447e-05	6.73263	0.108515	0.0406311	0.0146097
1992-04-15	1992	4	5.44663		3470.77		3410.93	51.6694	0.350959	1.04949	2.09697	0.0143969	1.73087	2.91244	0.0159619	0	0	0		1.20936	0.0867962	1.96858	2.20981	0.176294	2.03351	0.000160231	2.59802	0.105014	0.0393204	0.0151458
1992-05-15	1992	5	5.24551		3470.57		3410	51.7206	0.415781	1.2319	1.84201	0.128989	1.66909	3.52533	0.0332798	0	0	0		3.85638	0.278945	3.70207	3.38675	0.205191	3.18156	0.00153138	5.42322	0.108515	0.0406311	0.0159501
1992-06-15	1992	6	5.56755		3470.89		3409.55	51.7324	0.853972	1.15175	2.31157	0.155845	1.15781	3.85076	0.127414	0	0	0		6.86255	0.86629	4.01032	4.29995	0.43321	3.86674	0.038262	3.20632	0.105014	0.0393204	0.0157452
1992-07-15	1992	7	11.3436		3476.67		3408.49	51.6034	2.25457	1.22934	5.69444	0.332775	0.284164	6.13961	0.633924	0	0	0		23.9795	4.00997	9.35209	10.739	1.19557	9.54344	0.269608	6.16062	0.108515	0.0406311	0.0156373
1992-08-15	1992	8	20.0756		3485.4		3410.52	51.334	3.49538	0.26473	9.91736	0.216986	0.0269918	8.82543	0.793494	0	0	0		27.4649	9.2582	11.3758	10.7437	1.88653	8.85719	0.427006	2.18398	0.108515	0.0406311	0.0154293
1992-09-15	1992	9	21.4804		3486.8		3411.81	51.2953	4.20817	0.542268	10.4333	0.327235	0.0103534	7.64555	0.52854	0	0	0		13.92	11.0904	10.6478	8.56337	2.18462	6.37875	0.100669	5.29906	0.105014	0.0393204	0.0147831
1992-10-15	1992	10	13.1186		3478.44		3411.19	51.3282	2.51771	1.01339	6.76265	0.327235	0.0683751	5.17331	0.0597186	0	0	0		4.97154	3.54323	6.4531	5.51836	1.3337	4.18466	0.00124001	5.96098	0.108515	0.0406311	0.0148112
1992-11-15	1992	11	9.24875		3474.57		3410.67	51.3472	2.05956	0.870632	6.19659	0.182982	0.18682	3.0496	0.0138184	0	0	0		0.640363	2.43917	1.54968	2.53795	1.06145	1.4765	1.39451e-05	1.81952	0.105014	0.0393204	0.0134922
1992-12-15	1992	12	6.94593		3472.27		3409.76	51.358	1.18138	1.08426	5.50274	0.0989981	0.347342	2.92212	0.0140832	0	0	0		0.405681	1.54657	1.44735	3.14578	0.625446	2.52034	0	4.36772	0.108515	0.0406311	0.0131669
1993-01-15	1993	1	5.55934		3470.88		3408.82	51.4238	0.622554	1.08312	4.50161	0.276098	0.856884	3.28532	0.0173384	0	0	0		2.32701	1.16159	2.28118	3.64163	0.303437	3.33819	0	6.34931	0.109516	0.0404488	0.0129341
1993-02-15	1993	2	3.82264		3469.15		3408.45	51.4842	0.439769	0.984875	3.35263	0.276276	1.07725	3.05992	0.0187428	0	0	0		2.81071	0.522165	2.70445	3.27185	0.188327	3.08352	0	4.48593	0.0989178	0.0365344	0.0123945
1993-03-15	1993	3	3.62963		3468.95		3408.14	51.572	0.378459	0.781265	2.74733	0.276276	1.6287	3.40377	0.0256558	0	0	0		3.56945	0.268301	3.32291	3.29613	0.175828	3.1203	0	5.14975	0.109516	0.0404488	0.014264
1993-04-15	1993	4	2.98355		3468.31		3407.57	51.5956	0.446616	0.836509	2.25661	0.0144298	2.05778	3.51358	0.0200968	0	0	0		2.2891	0.354158	2.55459	2.21452	0.226285	1.98823	7.94321e-05	2.49265	0.105983	0.039144	0.0149742
1993-05-15	1993	5	2.29971		3467.62		3406.65	51.6323	0.635903	1.18212	1.92204	0.131478	1.5105	3.89414	0.0652014	0	0	0		4.79269	1.06551	4.0685	4.13798	0.323609	3.81437	0.00671261	5.49619	0.109516	0.0404488	0.0161473
1993-06-15	1993	6	4.56087		3469.88		3406.68	51.5934	1.56503	0.965775	3.40431	0.158422	0.608934	4.58976	0.322311	0	0	0		14.9906	2.0558	5.48902	6.93085	0.807674	6.12317	0.123095	2.44629	0.105983	0.039144	0.0155715
1993-07-15	1993	7	15.2135		3480.54		3408.71	51.3047	3.44445	0.543773	8.25179	0.337433	0.0553135	6.8807	1.01037	0	0	0		26.5387	6.32615	10.628	11.6145	1.848	9.76648	0.44172	4.81446	0.109516	0.0404488	0.0156907
1993-08-15	1993	8	18.1844		3483.51		3409.94	50.9791	3.78044	0.451405	9.28938	0.219022	0.00926877	8.01598	0.822017	0	0	0		23.6683	11.5114	11.4876	9.89895	2.04632	7.85263	0.469051	3.08211	0.109516	0.0404488	0.0155992
1993-09-15	1993	9	25.0957		3490.42		3411.67	51.0007	5.501	0.22525	11.7068	0.331168	0.0188025	8.55798	1.4055	0	0	0		27.9152	11.7113	10.624	12.8203	2.88521	9.93505	0.0927865	2.00007	0.105983	0.039144	0.0147318
1993-10-15	1993	10	15.8411		3481.16		3411.76	51.0158	3.55746	0.695907	7.97413	0.331168	0.0461038	5.68812	0.0936704	0	0	0		2.38738	7.61037	7.28373	5.31716	1.90931	3.40786	0.00269431	6.90572	0.109516	0.0404488	0.0149606
1993-11-15	1993	11	10.3773		3475.7		3411.06	51.0298	2.67486	0.984084	6.42319	0.1856	0.159045	3.17297	0.0149259	0	0	0		0.48254	2.03243	1.60448	3.02332	1.39143	1.63189	6.16317e-05	1.77128	0.105983	0.039144	0.0136128
1993-12-15	1993	12	7.49027		3472.81		3410.13	51.0443	1.44498	1.08394	5.83709	0.0992506	0.229371	2.927	0.0145676	0	0	0		0.360841	2.02487	1.48426	3.37148	0.77206	2.59942	9.32404e-07	4.28439	0.109516	0.0404488	0.013233
1994-01-15	1994	1	6.24526		3471.57		3409.14	51.107	0.775304	1.0326	5.0326	0.278463	0.648382	3.54173	0.0169233	0	0	0		3.66292	1.27762	2.99853	3.70093	0.388894	3.31204	0	5.91139	0.110416	0.0402389	0.0132007
1994-02-15	1994	2	5.53707		3470.86		3408.9	51.1766	0.58112	0.693226	4.34124	0.27862	1.24378	3.62875	0.0186076	0	0	0		2.813	1.19954	2.9972	2.79244	0.259614	2.53283	0	3.44523	0.0997304	0.0363448	0.012168
1994-03-15	1994	3	3.32323		3468.65		3408.4	51.2046	0.366469	0.961522	2.62542	0.27862	1.46225	3.33405	0.0182783	0	0	0		0.968082	0.505996	3.3673	3.40314	0.166566	3.23657	1.6529e-05	7.10545	0.110416	0.0402389	0.0148248
1994-04-15	1994	4	1.97462		3467.3		3407.58	51.2773	0.395092	1.03783	1.89933	0.0144624	1.68974	3.3848	0.0197799	0	0	0		2.15781	0.116118	2.2413	2.35197	0.198814	2.15316	0.000108771	2.51546	0.106854	0.0389409	0.0149901
1994-05-15	1994	5	1.12919		3466.45		3406.63	51.3182	0.414406	1.30574	1.37536	0.133799	1.56321	3.67854	0.0367743	0	0	0		3.30955	0.246186	3.78693	3.5485	0.202705	3.34579	0.0042406	6.34167	0.110416	0.0402389	0.0163342
1994-06-15	1994	6	4.83467		3470.16		3406.61	51.2297	1.5993	1.12663	3.55365	0.161001	0.669389	4.69614	0.508375	0	0	0		19.2769	1.6489	5.71505	8.25085	0.825829	7.42502	0.171376	2.26058	0.106854	0.0389409	0.0156567
1994-07-15	1994	7	19.2317		3484.56		3409.3	50.868	4.1754	0.50134	10.512	0.342026	0.0553643	7.47546	1.32891	0	0	0		33.856	7.94389	10.454	14.442	2.24836	12.1937	0.546549	3.3474	0.110416	0.0402389	0.0156091
1994-08-15	1994	8	31.424		3496.75		3412.5	50.5197	6.19185	0.102745	15.9114	0.221055	0.00817433	9.47559	1.81781	0	0	0		33.2426	19.622	11.192	16.2073	3.36664	12.8406	0.538537	1.28596	0.110416	0.0402389	0.0154814
1994-09-15	1994	9	25.7403		3491.06		3413.19	50.4176	5.53819	0.466958	12.8513	0.335045	0.00680997	7.75156	0.501651	0	0	0		13.8688	11.321	10.8244	8.98498	2.88807	6.09691	0.162076	5.52923	0.106854	0.0389409	0.014868
1994-10-15	1994	10	14.1814		3479.51		3412.49	50.4339	3.11349	0.901805	7.44777	0.335045	0.042	4.70769	0.0302749	0	0	0		2.17608	5.16494	5.89724	5.08137	1.66036	3.421	0.000964134	7.00259	0.110416	0.0402389	0.0148577
1994-11-15	1994	11	10.7444		3476.07		3411.67	50.4473	2.40257	1.14273	7.21069	0.188217	0.156576	2.83229	0.0141435	0	0	0		0.382624	1.86306	1.25576	2.98032	1.24231	1.73801	1.17576e-06	1.86222	0.106854	0.0389409	0.0135408
1994-12-15	1994	12	8.08022		3473.4		3410.58	50.4667	1.29368	1.18864	6.59041	0.099275	0.292535	2.87842	0.0146125	0	0	0		0.493218	1.9991	1.44646	3.45291	0.687709	2.7652	0	4.43889	0.110416	0.0402389	0.0132224
1995-01-15	1995	1	7.34627		3472.67		3409.55	50.5272	0.745912	1.03175	5.84881	0.280748	0.86888	3.79228	0.0214811	0	0	0		3.89136	1.54668	2.76255	3.75473	0.371214	3.38351	0	6.11102	0.124399	0.0447432	0.0128712
1995-02-15	1995	2	5.83511		3471.16		3409.19	50.5954	0.53137	0.822077	4.86611	0.280937	1.3314	3.52188	0.0184342	0	0	0		2.46756	1.15185	2.93713	3.06414	0.234555	2.82959	0	3.71529	0.112361	0.0404132	0.0123231
1995-03-15	1995	3	4.60214		3469.93		3408.75	50.6637	0.3676	0.843734	3.65609	0.280937	1.7564	3.58161	0.022986	0	0	0		2.83798	0.463533	3.71016	3.39304	0.168342	3.2247	4.8033e-07	6.2904	0.124399	0.0447432	0.0145201
1995-04-15	1995	4	3.17654		3468.5		3408.01	50.703	0.407162	1.02539	2.9126	0.014495	1.93705	3.47359	0.0188723	0	0	0		1.15248	0.141529	2.236	2.35763	0.205216	2.15242	9.8463e-05	2.96679	0.120386	0.0432999	0.015228
1995-05-15	1995	5	1.53898		3466.86		3406.7	50.7327	0.459742	1.40893	2.23439	0.136175	1.45928	3.67517	0.0547659	0	0	0		2.27132	0.404229	3.77552	3.7473	0.226414	3.52088	0.0128837	6.82997	0.124399	0.0447432	0.016505
1995-06-15	1995	6	3.3181		3468.64		3406.26	50.6182	1.46019	1.29653	3.6493	0.163578	0.39439	4.33961	0.45654	0	0	0		13.2669	2.16956	5.02794	6.98066	0.752725	6.22794	0.213815	2.83151	0.120386	0.0432999	0.0159138
1995-07-15	1995	7	13.1002		3478.42		3407.71	50.3357	3.53015	0.810983	7.84321	0.346542	0.032245	6.62108	1.19826	0	0	0		29.7551	7.42732	10.0363	13.1936	1.90034	11.2933	0.458611	5.07897	0.124399	0.0447432	0.0157576
1995-08-15	1995	8	24.3579		3489.68		3410.36	50.1057	5.11005	0.14685	12.9676	0.223007	0.00699711	9.31148	1.4488	0	0	0		34.1987	15.5617	11.0817	14.252	2.78171	11.4703	0.409621	1.27638	0.124399	0.0447432	0.0154798
1995-09-15	1995	9	26.0305		3491.35		3412.22	50.07	6.0189	0.365636	13.2986	0.338788	0.00689941	7.95055	1.08888	0	0	0		18.2611	13.7745	10.751	11.0557	3.15014	7.9056	0.107769	4.38519	0.120386	0.0432999	0.0149433
1995-10-15	1995	10	13.2082		3478.53		3411.79	50.0928	3.18872	0.935954	7.37409	0.338788	0.0419075	4.65991	0.110462	0	0	0		1.97443	5.30822	6.22062	5.69795	1.70484	3.99311	0.0018398	7.22859	0.124399	0.0447432	0.0151063
1995-11-15	1995	11	9.87133		3475.19		3411.02	50.1317	2.39884	0.985967	6.82051	0.190833	0.320261	3.2986	0.0247488	0	0	0		2.28584	2.31833	1.79846	3.22423	1.24105	1.98318	0	1.81067	0.120386	0.0432999	0.013581
1995-12-15	1995	12	7.05018		3472.37		3410.02	50.1574	1.23871	1.04132	6.04104	0.0995478	0.519918	3.23875	0.0166996	0	0	0		1.40215	1.94385	1.9725	3.33497	0.65777	2.6772	0	3.90675	0.124399	0.0447432	0.013326
1996-01-15	1996	1	6.46027		3471.78		3409.22	50.2199	0.715212	0.903286	5.39987	0.283181	1.04036	3.97369	0.0240346	0	0	0		3.92434	1.83444	2.95111	3.59839	0.356657	3.24173	0	5.63626	0.125317	0.0445098	0.0130569
1996-02-15	1996	2	5.41304		3470.74		3408.96	50.2934	0.567834	0.686214	4.39344	0.283256	1.66248	3.87014	0.0242563	0	0	0		4.06045	0.975122	3.36948	3.09078	0.261307	2.82947	0	3.8565	0.117232	0.0416382	0.0127467
1996-03-15	1996	3	4.43185		3469.76		3408.54	50.3672	0.445385	0.871539	3.27367	0.283256	2.14876	3.80209	0.0211289	0	0	0		1.95407	0.504036	3.96744	3.40966	0.209272	3.20039	8.81546e-06	7.13851	0.125317	0.0445098	0.0148651
1996-04-15	1996	4	2.20479		3467.53		3407.55	50.4138	0.430784	1.11929	2.24514	0.0145276	2.31749	3.42227	0.0199255	0	0	0		1.37012	0.14798	2.27823	2.56883	0.215183	2.35364	0.000132259	2.8969	0.121274	0.043074	0.0152043
1996-05-15	1996	5	1.10767		3466.43		3406.47	50.458	0.462749	1.37594	1.77784	0.138516	1.99666	3.71115	0.0424	0	0	0		2.72997	0.482807	3.73244	3.67573	0.227195	3.44853	0.00470898	6.63858	0.125317	0.0445098	0.0163221
1996-06-15	1996	6	4.35314		3469.68		3406.4	50.4656	1.57617	1.11505	3.55061	0.166158	1.2009	4.61339	0.591516	0	0	0		20.0736	1.15074	5.21541	7.95988	0.814517	7.14536	0.0770957	1.94685	0.121274	0.043074	0.0155781
1996-07-15	1996	7	18.1883		3483.51		3409.21	50.2374	4.32757	0.430575	9.57884	0.351072	0.15926	7.22108	1.99778	0	0	0		33.4757	12.8908	10.1156	15.4708	2.34018	13.1306	0.395243	2.97864	0.125317	0.0445098	0.0157204
1996-08-15	1996	8	31.0934		3496.42		3412.8	49.9782	6.74946	0.0842539	14.7925	0.224971	0.0113725	9.42178	2.34947	0	0	0		38.1891	15.4341	10.7933	17.8291	3.67308	14.156	0.425939	0.830548	0.125317	0.0445098	0.0154523
1996-09-15	1996	9	29.504		3494.83		3414.4	49.9505	6.93383	0.28239	13.9082	0.342486	0.00702898	8.19537	0.805127	0	0	0		15.8342	17.1345	10.9737	10.7164	3.62811	7.08825	0.102826	4.27272	0.121274	0.043074	0.0149739
1996-10-15	1996	10	18.1685		3483.49		3413.83	50.003	3.93108	0.634479	8.76531	0.342486	0.136658	5.72599	0.126438	0	0	0		5.8422	7.52542	6.80667	5.70201	2.11178	3.59023	0.000973232	5.58777	0.125317	0.0445098	0.0148955
1996-11-15	1996	11	12.3082		3477.63		3413	50.013	2.76481	0.888447	7.19991	0.193449	0.33365	3.22351	0.0187149	0	0	0		0.2327	2.55421	1.50344	3.02155	1.43698	1.58457	6.453e-06	1.8606	0.121274	0.043074	0.0135207
1996-12-15	1996	12	9.27016		3474.59		3411.89	50.0216	1.45515	1.06642	6.57775	0.0996426	0.407785	3.06004	0.0161755	0	0	0		0.286094	2.08387	1.39897	3.38472	0.776285	2.60844	2.82547e-08	4.39258	0.125317	0.0445098	0.0130975
1997-01-15	1997	1	7.14803		3472.47		3410.71	50.0829	0.726872	1.13908	5.56922	0.285439	0.650657	3.28704	0.0165004	0	0	0		2.02108	1.19807	2.18792	3.88747	0.359751	3.52771	0	6.49457	0.12615	0.0442479	0.012909
1997-02-15	1997	2	5.69488		3471.02		3410.2	50.1228	0.494202	0.910726	4.63902	0.285579	1.09467	3.25215	0.0184535	0	0	0		1.10463	1.06595	2.40946	3.06801	0.214934	2.85307	0	4.57244	0.113942	0.0399658	0.0122567
1997-03-15	1997	3	3.79451		3469.12		3409.64	50.1749	0.345876	1.00929	3.14592	0.285579	1.29619	3.19914	0.0193192	0	0	0		1.55796	0.367239	3.17335	3.65928	0.155285	3.50399	9.88914e-07	6.66348	0.12615	0.0442479	0.0146673
1997-04-15	1997	4	3.32155		3468.65		3408.85	50.2199	0.42648	0.908054	2.94758	0.0145602	1.62083	3.6363	0.0224027	0	0	0		3.57403	0.233089	2.59531	2.43216	0.216348	2.21581	2.84643e-05	2.2618	0.122081	0.0428205	0.0147993
1997-05-15	1997	5	2.71038		3468.03		3408.02	50.2678	0.507724	1.22882	2.40956	0.141004	1.54373	3.88559	0.0332619	0	0	0		3.83242	0.731506	3.88286	3.77827	0.253278	3.525	0.00157138	5.79585	0.12615	0.0442479	0.0160769
1997-06-15	1997	6	4.71054		3470.03		3407.98	50.2875	1.36676	0.98033	3.41976	0.168736	0.96282	4.48983	0.376464	0	0	0		16.021	1.38013	5.13831	6.73022	0.703887	6.02633	0.0623962	2.54647	0.122081	0.0428205	0.0156198
1997-07-15	1997	7	20.3661		3485.69		3410.84	49.9945	4.65699	0.381784	9.934	0.355615	0.0993911	7.39574	2.0353	0	0	0		35.2728	12.1961	10.2419	15.8389	2.51719	13.3217	0.451491	3.11522	0.12615	0.0442479	0.0157554
1997-08-15	1997	8	27.5874		3492.91		3413.24	49.7448	5.80502	0.137733	13.3612	0.226947	0.0083664	8.96959	1.41505	0	0	0		30.0021	13.5498	11.1326	13.9053	3.15376	10.7515	0.398827	1.75454	0.12615	0.0442479	0.0156032
1997-09-15	1997	9	25.7508		3491.07		3414.12	49.726	5.60366	0.300903	12.1943	0.346153	0.00936888	8.26362	0.507906	0	0	0		14.8944	14.2783	10.9006	8.93008	2.91757	6.0125	0.0958402	3.98305	0.122081	0.0428205	0.0149715
1997-10-15	1997	10	14.9916		3480.32		3413.41	49.762	2.97285	0.77485	7.50677	0.346153	0.176174	5.33975	0.0219165	0	0	0		4.16398	3.08695	6.5152	4.66235	1.58317	3.07918	3.67876e-05	5.95445	0.12615	0.0442479	0.0147163
1997-11-15	1997	11	12.3051		3477.63		3412.66	49.8128	2.44424	0.888234	7.55227	0.196074	0.481794	3.57284	0.0167611	0	0	0		2.47544	2.29686	2.33904	3.03085	1.2673	1.76356	1.09373e-07	1.82506	0.122081	0.0428205	0.013617
1997-12-15	1997	12	12.2679		3477.59		3411.85	49.8805	1.62656	0.769406	7.45487	0.0998958	1.1462	4.73644	0.0296325	0	0	0		4.77688	2.73769	2.90115	3.4216	0.870835	2.55077	0	3.34122	0.12615	0.0442479	0.0130042
1998-01-15	1998	1	9.05774		3474.38		3410.89	49.9213	0.808418	0.990085	5.96231	0.287842	1.41536	4.09003	0.0168521	0	0	0		1.0488	1.7539	2.63344	3.61313	0.405036	3.2081	0	6.26837	0.126954	0.0439856	0.0129475
1998-02-15	1998	2	7.20336		3472.53		3410.41	49.9796	0.553692	0.914394	4.95909	0.287915	1.72179	3.68021	0.018681	0	0	0		2.23514	0.658041	2.95347	3.32217	0.243473	3.0787	0	4.35136	0.114668	0.0397289	0.0124054
1998-03-15	1998	3	6.66551		3471.99		3410.05	50.0573	0.412286	0.6831	4.40677	0.287915	2.23262	3.83978	0.0235774	0	0	0		4.09515	0.645757	3.69202	3.25386	0.193433	3.06043	5.65094e-08	5.24509	0.126954	0.0439856	0.0143555
1998-04-15	1998	4	5.81297		3471.14		3409.28	50.0812	0.529667	0.843084	3.81041	0.0145931	2.52339	4.02413	0.0250353	0	0	0		2.38292	0.86086	2.93728	2.58137	0.268815	2.31255	0.000161544	2.94501	0.122858	0.0425667	0.0152142
1998-05-15	1998	5	4.75853		3470.08		3408.38	50.1167	0.73907	1.19415	3.18871	0.143386	1.92806	4.30424	0.0864907	0	0	0		4.90953	1.39616	4.491	4.48045	0.3774	4.10305	0.0103404	6.59268	0.126954	0.0439856	0.0164734
1998-06-15	1998	6	5.21078		3470.53		3407.9	50.0039	1.57881	1.18888	3.98106	0.171315	0.780017	4.54358	0.388748	0	0	0		14.7871	1.9206	5.2746	7.21915	0.812804	6.40635	0.213808	2.68137	0.122858	0.0425667	0.0159594
1998-07-15	1998	7	21.9315		3487.26		3410.97	49.6985	5.11226	0.43076	11.0455	0.360051	0.0594851	7.38139	2.19651	0	0	0		35.9647	13.9729	10.2729	16.4845	2.75862	13.7259	0.495161	3.42154	0.126954	0.0439856	0.0158112
1998-08-15	1998	8	26.962		3492.29		3412.82	49.3614	6.18924	0.183011	12.7901	0.228813	0.00703532	8.84372	1.86684	0	0	0		33.6076	15.8353	11.1708	14.4182	3.37318	11.045	0.530301	0.879327	0.126954	0.0439856	0.015704
1998-09-15	1998	9	22.8247		3488.15		3413.39	49.2974	5.6306	0.389942	10.4955	0.349686	0.00654781	7.86629	0.718479	0	0	0		17.0598	11.9685	11.312	9.33132	2.9455	6.38582	0.134501	3.93593	0.122858	0.0425667	0.0151461
1998-10-15	1998	10	16.687		3482.01		3413.15	49.3501	3.65817	0.394153	8.35743	0.349686	0.101701	6.52585	0.128344	0	0	0		6.88076	5.65739	8.32022	5.20877	1.96702	3.24175	0.00662538	5.0167	0.126954	0.0439856	0.0153047
1998-11-15	1998	11	11.3949		3476.72		3412.45	49.3662	2.84912	0.777925	6.99126	0.198704	0.261033	3.81112	0.0161186	0	0	0		1.04305	2.76699	2.42497	3.0763	1.48216	1.59413	4.44601e-05	1.94303	0.122858	0.0425667	0.0138798
1998-12-15	1998	12	7.82114		3473.14		3411.45	49.3758	1.53526	0.999844	6.04756	0.100072	0.346153	3.27826	0.0160064	0	0	0		0.309857	2.00763	1.6488	3.37505	0.81973	2.55532	0	4.43902	0.126954	0.0439856	0.0133833
1999-01-15	1999	1	5.79627		3471.12		3410.22	49.3876	0.810142	1.10452	5.23667	0.290043	0.588481	3.46372	0.016403	0	0	0		1.63443	1.26995	2.26913	3.87162	0.403787	3.46783	0	6.86323	0.127728	0.0436954	0.013029
1999-02-15	1999	2	4.20824		3469.53		3409.79	49.4257	0.524687	0.969452	4.17099	0.290244	0.87921	3.46617	0.0152727	0	0	0		1.85024	0.878596	3.02401	3.21406	0.228531	2.98553	2.04163e-07	4.7266	0.115367	0.0394668	0.0126356
1999-03-15	1999	3	2.11629		3467.44		3409.15	49.4599	0.315127	1.11207	2.64506	0.290244	1.10073	3.35313	0.0168762	0	0	0		0.728581	0.283643	3.16174	3.77966	0.137053	3.64261	6.15952e-06	7.59687	0.127728	0.0436954	0.0149879
1999-04-15	1999	4	-0.066134		3465.26		3407.91	49.4834	0.319492	1.25045	1.79452	0.0146263	1.13632	3.32879	0.0178303	0	0	0		0.80586	0.153543	2.26379	2.62318	0.159379	2.4638	0.000897788	3.46603	0.123608	0.0422859	0.0156981
1999-05-15	1999	5	-0.481915		3464.84		3406.53	49.5254	0.460768	1.43557	1.9756	0.145432	0.783972	3.92362	0.0582875	0	0	0		5.447	0.472188	4.54739	4.35696	0.227346	4.12961	0.0153757	6.42007	0.127728	0.0436954	0.0164173
1999-06-15	1999	6	3.23438		3468.56		3406.55	49.5368	1.57632	1.09707	4.10636	0.173893	0.354356	4.74934	0.417172	0	0	0		17.3342	2.01639	5.53907	7.70174	0.814498	6.88725	0.094987	2.30252	0.123608	0.0422859	0.0157389
1999-07-15	1999	7	14.2511		3479.57		3408.44	49.3327	4.07873	0.663427	8.24141	0.364442	0.0354327	6.71292	1.70669	0	0	0		33.6644	9.94904	9.70422	14.3929	2.19826	12.1946	0.38308	4.28652	0.127728	0.0436954	0.0159337
1999-08-15	1999	8	23.9341		3489.26		3411.01	49.0989	5.6897	0.136369	12.7665	0.230631	0.00674262	8.89292	1.42174	0	0	0		27.4618	15.9177	10.9898	13.814	3.09661	10.7173	0.389756	1.66219	0.127728	0.0436954	0.0157474
1999-09-15	1999	9	22.6812		3488		3411.88	49.0213	5.8522	0.351296	11.5476	0.35313	0.00641389	8.30501	0.684277	0	0	0		20.9606	12.0501	10.702	10.6779	3.06131	7.6166	0.153986	3.17618	0.123608	0.0422859	0.0150939
1999-10-15	1999	10	16.5399		3481.86		3411.85	49.0708	4.23759	0.414221	8.78212	0.35313	0.118316	6.88282	0.14976	0	0	0		7.36345	9.9706	7.47594	6.02985	2.28056	3.74929	0.00111032	5.03359	0.127728	0.0436954	0.0151367
1999-11-15	1999	11	9.22285		3474.55		3410.96	49.0799	3.06138	0.83078	6.55079	0.201338	0.300994	3.54768	0.0159308	0	0	0		0.31479	1.93679	1.95889	3.19829	1.59372	1.60457	4.59366e-06	1.8745	0.123608	0.0422859	0.013815
1999-12-15	1999	12	6.25106		3471.57		3409.94	49.0912	1.59354	1.04073	6.16043	0.10026	0.420501	3.21478	0.0160004	0	0	0		0.497114	2.10711	1.64637	3.49364	0.849007	2.64464	0	4.49914	0.127728	0.0436954	0.0133942
2000-01-15	2000	1	3.74928		3469.07		3408.61	49.1275	0.800609	1.20618	5.03812	0.292374	0.648422	3.32977	0.0193284	0	0	0		1.34803	1.39255	2.23698	4.10149	0.396342	3.70515	0	7.20788	0.145441	0.0491291	0.0132441
2000-02-15	2000	2	2.90844		3468.23		3408.19	49.1909	0.566055	0.842171	4.33974	0.292503	1.30324	3.48895	0.0204003	0	0	0		2.34326	0.999864	2.62135	3.27048	0.257854	3.01263	0	4.38349	0.136058	0.0459595	0.0126733
2000-03-15	2000	3	1.17472		3466.5		3407.57	49.2589	0.378278	1.0054	2.94798	0.292503	1.65979	3.36013	0.0226174	0	0	0		1.82706	0.399966	3.23349	3.72813	0.170945	3.55718	0	7.17941	0.145441	0.0491291	0.0147293
2000-04-15	2000	4	-0.388834		3464.93		3406.46	49.2864	0.424923	1.1439	2.37703	0.0146599	1.77156	3.42633	0.0299267	0	0	0		2.53533	0.364923	2.66966	2.87155	0.214461	2.65709	0.000219812	3.09059	0.140749	0.0475443	0.0155439
2000-05-15	2000	5	0.17007		3465.49		3405.53	49.3295	0.788555	1.28514	2.7356	0.147867	1.2575	4.27015	0.146122	0	0	0		7.90446	1.24471	5.04368	5.29654	0.404925	4.89161	0.0160048	5.98327	0.145441	0.0491291	0.016413
2000-06-15	2000	6	7.51459		3472.84		3406.36	49.2872	2.88677	0.832422	6.76671	0.176409	0.322486	5.25798	0.952913	0	0	0		22.2208	6.35707	6.07941	10.743	1.51335	9.22965	0.187977	1.85185	0.140749	0.0475443	0.0156612
2000-07-15	2000	7	16.9625		3482.29		3408.77	49.025	4.99676	0.399317	9.84891	0.368583	0.0302803	7.33169	1.51788	0	0	0		35.0487	10.6826	10.1174	14.98	2.70625	12.2738	0.43532	2.62661	0.145441	0.0491291	0.0158553
2000-08-15	2000	8	21.2545		3486.58		3410.51	48.7538	5.42221	0.228393	11.8102	0.23226	0.00729153	8.58863	1.02068	0	0	0		25.15	16.213	11.2567	11.9481	2.94711	9.00095	0.421063	2.38632	0.145441	0.0491291	0.0158925
2000-09-15	2000	9	20.3068		3485.63		3411.34	48.7707	5.63663	0.45399	10.6619	0.356341	0.0105991	7.4573	0.943628	0	0	0		15.5927	13.2817	10.2553	10.0512	2.94703	7.10422	0.0515384	5.39401	0.140749	0.0475443	0.0151476
2000-10-15	2000	10	8.8619		3474.19		3410.38	48.7867	3.00581	1.20686	5.99711	0.356341	0.0445928	4.30715	0.0969653	0	0	0		1.32053	3.98374	5.55197	6.19368	1.60366	4.59002	0.00296267	8.0961	0.145441	0.0491291	0.0154439
2000-11-15	2000	11	5.3514		3470.68		3409.54	48.8125	2.14486	1.11167	5.79146	0.203909	0.148228	2.90589	0.0195019	0	0	0		0.449035	1.75176	1.3085	2.99786	1.10992	1.88794	1.94137e-05	2.15557	0.140749	0.0475443	0.0139926
2000-12-15	2000	12	3.0122		3468.34		3408.46	48.8314	1.10335	1.22147	5.30263	0.100282	0.271098	3.03155	0.01819	0	0	0		0.440895	1.71193	1.45785	3.58683	0.583426	3.00341	5.93348e-07	4.79418	0.145441	0.0491291	0.0134534
2001-01-15	2001	1	1.00893		3466.33		3407.18	48.8671	0.609947	1.21141	4.34672	0.29446	0.508842	3.29424	0.018404	0	0	0		0.945728	1.28382	2.11747	3.93075	0.293587	3.63716	0	7.31664	0.146283	0.0488315	0.0131214
2001-02-15	2001	2	-1.07567		3464.25		3406.63	48.9012	0.395355	1.08792	3.15183	0.294599	0.645822	3.11992	0.0179472	0	0	0		1.10729	0.721881	2.48525	3.45599	0.164779	3.29121	0	5.02863	0.132127	0.0441059	0.0126538
2001-03-15	2001	3	-2.43461		3462.89		3406.02	48.9567	0.282498	1.06626	2.09499	0.294599	0.922037	3.22919	0.0194919	0	0	0		1.65473	0.260136	3.35484	3.76266	0.119306	3.64336	0	7.12872	0.146283	0.0488315	0.014937
2001-04-15	2001	4	-3.63619		3461.69		3404.9	49.0028	0.344524	1.10023	1.68577	0.0142294	1.18377	3.43205	0.0213238	0	0	0		2.25776	0.140586	2.6493	2.56788	0.173649	2.39423	8.01977e-05	3.20735	0.141565	0.0472563	0.0154503
2001-05-15	2001	5	-2.72659		3462.6		3403.84	49.0472	0.629578	1.29105	2.26918	0.149632	0.985312	4.31164	0.0754913	0	0	0		7.09241	0.859899	4.96969	4.80664	0.320243	4.4864	0.00957144	5.82721	0.146283	0.0488315	0.0164322
2001-06-15	2001	6	2.5966		3467.92		3404.56	48.993	2.12964	0.78903	5.20463	0.176954	0.326852	5.28267	0.457996	0	0	0		21.1644	3.04915	6.19657	8.98326	1.10909	7.87417	0.158908	1.59474	0.141565	0.0472563	0.0155934
2001-07-15	2001	7	15.8899		3481.21		3407.5	48.6494	4.48589	0.440689	10.9853	0.37048	0.0182988	7.34291	1.42073	0	0	0		33.2954	10.4139	10.2456	14.6646	2.41547	12.2491	0.503738	3.50872	0.146283	0.0488315	0.0159548
2001-08-15	2001	8	19.0573		3484.38		3409.05	48.3778	4.77593	0.231928	12.2333	0.231501	0.00628255	8.67582	0.794627	0	0	0		22.3867	13.4216	11.3023	10.8568	2.59052	8.26631	0.419882	2.63865	0.146283	0.0488315	0.0159975
2001-09-15	2001	9	13.4831		3478.81		3409.12	48.3552	4.35651	0.938146	8.85573	0.357092	0.00638483	6.14569	0.674296	0	0	0		10.4812	10.5515	9.74745	8.3058	2.27572	6.03007	0.0664511	7.00469	0.141565	0.0472563	0.0154296
2001-10-15	2001	10	8.54521		3473.87		3408.61	48.3834	2.83076	0.74254	7.48947	0.357094	0.024157	5.14602	0.28792	0	0	0		7.19178	5.06225	6.46459	6.27204	1.51987	4.75217	0.00257366	5.97717	0.146283	0.0488315	0.0154343
2001-11-15	2001	11	3.23013		3468.55		3407.64	48.3924	2.0846	1.03079	6.10733	0.203605	0.0858342	2.9947	0.0183648	0	0	0		0.313525	1.88375	1.41231	2.88579	1.07705	1.80874	6.66628e-05	1.93949	0.141565	0.0472563	0.0139743
2001-12-15	2001	12	0.978161		3466.3		3406.65	48.4122	1.02101	1.16314	5.71743	0.101281	0.153812	3.06635	0.0182167	0	0	0		0.300092	1.77514	1.43966	3.46261	0.537745	2.92486	1.97783e-07	4.74288	0.146283	0.0488315	0.0135104
2002-01-15	2002	1	-0.814381		3464.51		3405.32	48.4251	0.576781	1.12989	4.90553	0.273716	0.406421	3.45598	0.0202556	0	0	0		2.50673	1.25037	2.42823	3.97442	0.278989	3.69543	0	6.43857	0.148071	0.048861	0.0133529
2002-02-15	2002	2	-1.04882		3464.27		3405	48.4977	0.474617	0.713079	4.37439	0.273823	1.02287	3.88622	0.0286581	0	0	0		3.49425	1.1164	3.2585	2.9675	0.207566	2.75994	0	3.85868	0.133741	0.0441325	0.0126599
2002-03-15	2002	3	-2.27553		3463.05		3404.4	48.5539	0.375919	0.973481	3.07007	0.273823	1.5858	3.78771	0.023564	0	0	0		2.00958	0.528514	3.74026	3.68695	0.171676	3.51528	2.82547e-08	7.3491	0.148071	0.048861	0.0151336
2002-04-15	2002	4	-4.0362	1.719	3461.29		3403.29	48.6079	0.422521	1.15605	2.39599	0.0142308	1.62764	3.75382	0.0240167	0	0	0		2.48169	0.346764	2.78412	2.91804	0.213157	2.70488	0.000235152	3.28313	0.143294	0.0472848	0.0156657
2002-05-15	2002	5	-4.41332	-0.6183	3460.91		3402.22	48.6532	0.585998	1.37905	2.28822	0.129836	1.43181	4.16314	0.0551636	0	0	0		5.02724	0.868331	4.44672	4.50161	0.296624	4.20499	0.00522381	6.01998	0.148071	0.048861	0.0166699
2002-06-15	2002	6	-2.98559		3462.34		3402.11	48.6041	1.39484	0.979842	3.60277	0.156768	0.686916	4.60319	0.195267	0	0	0		11.2792	2.25947	5.22138	6.03506	0.717351	5.31771	0.115828	2.80301	0.143294	0.0472848	0.0160398
2002-07-15	2002	7	2.14317		3467.47		3402.53	48.349	2.87272	1.05161	5.61577	0.344434	0.0470612	5.81151	0.844349	0	0	0		19.9783	6.09357	9.73342	10.0207	1.5338	8.48689	0.418254	8.41579	0.148071	0.048861	0.0165286
2002-08-15	2002	8	10.1878	16.0877	3475.51		3403.9	48.0688	4.30392	0.470223	9.01544	0.223839	0.00681182	8.1917	1.32633	0	0	0		30.6973	10.5811	11.0697	13.5636	2.34142	11.2222	0.441044	2.19133	0.148071	0.048861	0.0160044
2002-09-15	2002	9	11.0119	23.4863	3476.34		3405.21	48.1231	4.7096	0.42852	9.44673	0.336609	0.0161302	7.45595	0.610724	0	0	0		16.2487	10.1193	10.1262	8.9942	2.46115	6.53305	0.0401866	3.59642	0.143294	0.0472848	0.0152805
2002-10-15	2002	10	2.69985	17.8368	3468.02		3404.72	48.145	2.67279	0.919974	6.0199	0.336609	0.103861	5.05022	0.0547747	0	0	0		2.85501	4.97023	5.988	5.27705	1.42069	3.85636	0.000633724	7.00635	0.148071	0.048861	0.0154222
2002-11-15	2002	11	-1.07851	10.874	3464.25		3404.09	48.1591	2.10963	0.902192	5.42586	0.181588	0.204519	3.15569	0.0180021	0	0	0		0.432316	1.56114	1.49213	2.75899	1.08875	1.67023	1.13474e-05	1.92996	0.143294	0.0472848	0.0140352
2002-12-15	2002	12	-3.47328	5.0446	3461.85		3403.13	48.1837	1.07349	1.08476	4.81248	0.097949	0.269797	3.18162	0.0185266	0	0	0		0.79343	1.56668	1.65254	3.45221	0.566343	2.88586	1.69528e-07	4.77144	0.148071	0.048861	0.0137395
2003-01-15	2003	1	-5.20837	2.8996	3460.12		3402.05	48.2399	0.594274	1.08753	3.97321	0.284245	0.459395	3.405	0.0195129	0	0	0		1.85777	1.16416	2.01643	3.8863	0.28741	3.59889	0	6.44187	0.149698	0.0488594	0.0129602
2003-02-15	2003	2	-4.48528	2.3355	3460.84		3401.85	48.3197	0.524572	0.632115	3.88821	0.284431	1.06134	4.2523	0.0300788	0	0	0		4.33022	1.03497	3.75274	2.98419	0.231946	2.75224	0	3.43116	0.135211	0.0441311	0.012731
2003-03-15	2003	3	-5.80208	0.0201	3459.52		3401.38	48.3649	0.408267	0.841265	2.69131	0.284431	1.52183	4.01157	0.0219864	0	0	0		2.00169	0.886448	3.96751	3.32528	0.188682	3.1366	7.06367e-07	7.21845	0.149698	0.0488594	0.0149668
2003-04-15	2003	4	-7.67855	-4.2053	3457.65		3400.23	48.4072	0.457882	1.20364	1.87537	0.0141846	1.5889	3.84256	0.0229153	0	0	0		2.21806	0.288515	2.8799	2.96141	0.231506	2.7299	0.000215191	3.31309	0.144869	0.0472833	0.0157722
2003-05-15	2003	5	-8.45973	-7.5788	3456.86		3399.14	48.449	0.466041	1.44802	1.68538	0.141995	1.50679	3.99519	0.0298975	0	0	0		2.25587	0.618933	3.86543	3.7848	0.229261	3.55554	0.00187566	7.14654	0.149698	0.0488594	0.0167078
2003-06-15	2003	6	-6.68001		3458.64		3398.71	48.4448	1.32816	1.28568	3.01561	0.169294	0.764548	4.60926	0.319794	0	0	0		15.4914	1.30242	5.34609	7.21295	0.683882	6.52907	0.094251	2.56133	0.144869	0.0472833	0.0161595
2003-07-15	2003	7	7.51696	9.6674	3472.84		3401.38	48.233	4.175	0.526615	9.16289	0.359367	0.0630308	7.36289	1.5754	0	0	0		33.3417	9.11386	10.2368	14.5393	2.25731	12.282	0.398024	3.5638	0.149698	0.0488594	0.0161618
2003-08-15	2003	8	12.7443	23.4289	3478.07		3403.7	47.9175	5.07111	0.170826	10.8406	0.226305	0.00697366	8.91182	1.22056	0	0	0		27.3437	14.6196	11.1653	12.5357	2.75967	9.776	0.466069	1.81687	0.149698	0.0488594	0.0160905
2003-09-15	2003	9	17.193	35.3251	3482.52		3405.75	47.859	6.31704	0.256623	11.9494	0.347313	0.00650582	8.66444	1.36143	0	0	0		27.0208	13.1866	10.4858	12.8791	3.30635	9.57271	0.155017	2.29713	0.144869	0.0472833	0.0153249
2003-10-15	2003	10	9.13751	28.502	3474.46		3405.99	47.8771	4.43314	0.579973	8.90275	0.347313	0.0349778	6.05229	0.246259	0	0	0		4.13517	11.4694	7.04651	6.72934	2.38398	4.34535	0.00190264	6.77333	0.149698	0.0488594	0.0153704
2003-11-15	2003	11	2.24668	18.6078	3467.57		3405.18	47.8903	3.0396	0.874659	6.79052	0.194376	0.127257	3.44994	0.0197161	0	0	0		0.221285	1.91643	1.76325	3.29657	1.58279	1.71378	5.49326e-05	1.84045	0.144869	0.0472833	0.0139989
2003-12-15	2003	12	-0.862843	13.8806	3464.46		3404.2	47.9151	1.57677	1.02189	6.11109	0.0990577	0.213544	3.30013	0.0185613	0	0	0		1.09735	2.18553	1.75489	3.62568	0.840066	2.78561	0	4.46098	0.149698	0.0488594	0.0136323
2004-01-15	2004	1	-2.46273	11.9852	3462.86		3402.97	47.9509	0.847303	1.02226	5.45633	0.281859	0.501591	3.80562	0.0213937	0	0	0		3.20852	1.64558	2.52985	4.01588	0.425636	3.59025	0	6.06694	0.151228	0.0487909	0.0132581
2004-02-15	2004	2	-4.01377	8.5034	3461.31		3402.5	47.9682	0.550869	0.908311	4.55919	0.281917	0.82947	3.69707	0.018143	0	0	0		0.497209	1.25802	3.01825	3.15892	0.249458	2.90947	0	5.53706	0.141472	0.0456431	0.0132559
2004-03-15	2004	3	-6.62758	1.2037	3458.7		3401.71	47.9843	0.32239	1.16189	2.9417	0.281917	0.783192	3.48674	0.0212379	0	0	0		0.706199	0.423033	3.58727	4.04837	0.14091	3.90746	9.08105e-05	8.20604	0.151228	0.0487909	0.0156014
2004-04-15	2004	4	-8.21815	-2.3305	3457.11		3400.45	48.0486	0.390722	1.2866	2.44277	0.0139013	0.807856	3.64488	0.0235994	0	0	0		3.36439	0.157819	3.01044	3.06721	0.196347	2.87086	0.000917448	3.33797	0.14635	0.047217	0.0158541
2004-05-15	2004	5	-8.47602	-6.6187	3456.85		3399.39	48.0985	0.516643	1.437	2.37125	0.139907	0.682108	4.13993	0.0698029	0	0	0		3.99964	0.654568	4.32001	4.34132	0.258108	4.08321	0.0110806	6.72326	0.151228	0.0487909	0.0168671
2004-06-15	2004	6	-4.00549	-2.9106	3461.32		3399.74	48.0877	1.83833	0.989353	4.71659	0.16667	0.261016	4.99641	0.519533	0	0	0		16.5319	2.85331	5.69819	8.26138	0.953835	7.30755	0.0941789	2.49448	0.14635	0.047217	0.0160068
2004-07-15	2004	7	4.38744	8.1884	3469.71		3401.35	47.9037	3.81132	0.713986	7.62872	0.356466	0.0177392	6.71305	1.2116	0	0	0		27.8592	11.2333	10.1169	12.1156	2.05539	10.0602	0.350572	5.07493	0.151228	0.0487909	0.0163314
2004-08-15	2004	8	11.2032	20.1223	3476.53		3403.22	47.6304	4.50356	0.294661	10.8851	0.224907	0.00602394	8.61837	1.14721	0	0	0		29.3776	8.67006	11.0698	12.9363	2.43948	10.4968	0.408559	1.95357	0.151228	0.0487909	0.0161265
2004-09-15	2004	9	8.47304	20.7287	3473.8		3403.81	47.5724	4.16111	0.769817	10.1701	0.344547	0.0119717	6.624	0.331637	0	0	0		12.956	10.8445	10.7139	8.09679	2.15982	5.93697	0.135273	5.77599	0.14635	0.047217	0.0156351
2004-10-15	2004	10	3.24763	17.1772	3468.57		3403.59	47.6164	2.89582	0.58961	7.57116	0.344547	0.138084	5.70677	0.121152	0	0	0		5.78183	5.30232	6.65524	5.07512	1.54315	3.53197	0.000231632	5.56354	0.151228	0.0487909	0.0153583
2004-11-15	2004	11	-1.39556	11.1151	3463.93		3402.87	47.6325	2.21405	0.970571	6.43114	0.191176	0.265579	3.33237	0.0183565	0	0	0		0.323245	1.98794	1.60859	2.87215	1.14613	1.72601	1.94137e-06	2.02519	0.14635	0.047217	0.0140667
2004-12-15	2004	12	-3.9513	6.5137	3461.37		3401.88	47.6553	1.14067	1.13651	5.87922	0.0984304	0.328813	3.23898	0.018683	0	0	0		0.341956	1.82756	1.6094	3.51974	0.603143	2.9166	6.78112e-07	4.97721	0.151228	0.0487909	0.0138229
2005-01-15	2005	1	-5.57961	2.6428	3459.74		3400.65	47.7012	0.629679	1.19348	5.01853	0.292133	0.687937	3.55447	0.0214901	0	0	0		3.12513	1.2352	2.61043	4.23609	0.305444	3.93064	0	6.43644	0.16826	0.0537075	0.0135129
2005-02-15	2005	2	-5.74619	2.5806	3459.58		3400.33	47.7821	0.491705	0.805104	4.48101	0.292285	1.47277	3.89794	0.0243347	0	0	0		2.37299	1.06646	3.28556	3.14864	0.212852	2.93579	0	4.73848	0.151976	0.04851	0.012917
2005-03-15	2005	3	-7.11419	-0.8919	3458.21		3399.79	47.8216	0.401282	0.948782	3.3144	0.292285	1.77981	3.83931	0.0225365	0	0	0		2.70415	0.408929	4.23175	3.72378	0.183845	3.53993	2.17561e-06	7.29931	0.16826	0.0537075	0.0154492
2005-04-15	2005	4	-8.91809	-6.2702	3456.41		3398.72	47.8769	0.397447	1.18603	2.69115	0.0138811	1.90195	3.59085	0.0230099	0	0	0		1.5764	0.227408	2.50997	2.80641	0.199351	2.60706	9.40334e-05	3.27009	0.162832	0.051975	0.015765
2005-05-15	2005	5	-9.81886	-8.8931	3455.5		3397.67	47.9148	0.410033	1.43233	2.17515	0.149266	1.79053	3.9316	0.0311917	0	0	0		2.31904	0.5797	3.89829	3.77817	0.198003	3.58016	0.00183989	7.27225	0.16826	0.0537075	0.0168181
2005-06-15	2005	6	-9.9424	-12.5437	3455.38		3396.85	47.8981	0.964147	1.49432	2.47564	0.176157	1.09478	4.22764	0.203351	0	0	0		10.8412	0.742143	4.67108	5.97394	0.48919	5.48475	0.0761346	3.57772	0.162832	0.051975	0.016602
2005-07-15	2005	7	8.30846	7.7728	3473.63		3400.15	47.6584	4.62813	0.646154	10.4167	0.368329	0.139141	7.36217	2.26071	0	0	0		37.9048	9.51847	10.1648	17.0924	2.49119	14.6012	0.402328	4.05669	0.16826	0.0537075	0.0162536
2005-08-15	2005	8	10.036	18.2756	3475.36		3401.99	47.3777	4.84281	0.339539	11.4759	0.227751	0.00881934	8.10604	0.995045	0	0	0		22.8622	14.0338	11.0869	11.4444	2.62384	8.82053	0.434796	3.1934	0.16826	0.0537075	0.0163299
2005-09-15	2005	9	6.79833	20.5264	3472.12		3402.27	47.3262	4.22196	0.602064	9.39306	0.353462	0.0076805	7.56496	0.383197	0	0	0		17.2707	8.47221	11.1212	8.54859	2.19536	6.35323	0.141249	3.9403	0.162832	0.051975	0.0156591
2005-10-15	2005	10	0.739683	16.257	3466.06		3402.12	47.3527	2.65853	0.813547	7.23831	0.353462	0.094633	5.30613	0.122224	0	0	0		4.24538	5.66406	6.64188	5.14203	1.41475	3.72728	0.00105689	7.00975	0.16826	0.0537075	0.0156032
2005-11-15	2005	11	-3.26526	8.7239	3462.06		3401.22	47.3595	2.16308	1.0964	6.32354	0.201213	0.252761	3.41292	0.02576	0	0	0		0.12528	2.05131	1.61011	3.02876	1.11796	1.9108	2.35152e-06	2.14087	0.162832	0.051975	0.0141042
2005-12-15	2005	12	-6.03649	1.6855	3459.29		3400.06	47.3715	1.14544	1.16884	5.84169	0.099732	0.298785	3.27545	0.0206469	0	0	0		0.337496	1.85591	1.54913	3.60453	0.606444	2.99808	0	4.87875	0.16826	0.0537075	0.0136543
2006-01-15	2006	1	-8.287	-0.8072	3457.04		3398.71	47.4416	0.599938	1.30887	4.74162	0.295376	0.51429	3.40077	0.0210439	0	0	0		0.911032	1.20456	2.24547	4.2887	0.287805	4.0009	4.2382e-07	7.73324	0.169765	0.0536337	0.0137082
2006-02-15	2006	2	-10.3215	-4.4704	3455		3398.11	47.4674	0.384736	1.2835	3.57346	0.295515	0.663729	3.20204	0.0195289	0	0	0		0.542934	0.536183	2.83822	3.81238	0.157714	3.65467	3.42738e-05	6.24851	0.153336	0.0484434	0.0135204
2006-03-15	2006	3	-10.7595	-6.5128	3454.56		3397.62	47.5242	0.316515	0.988859	3.07348	0.295515	0.966598	3.76025	0.0234059	0	0	0		3.60795	0.231859	4.13494	3.8255	0.138492	3.68701	6.49858e-07	6.892	0.169765	0.0536337	0.0153066
2006-04-15	2006	4	-11.8368	-11.1247	3453.49		3396.48	47.5794	0.373489	1.26952	2.61062	0.0131388	1.32036	3.81354	0.0230381	0	0	0		2.7287	0.178374	2.93128	2.91665	0.187031	2.72962	0.000101252	3.34848	0.164289	0.0519036	0.0159294
2006-05-15	2006	5	-11.9202	-13.3406	3453.4		3395.58	47.6134	0.552306	1.45023	2.52266	0.152866	1.12117	4.35356	0.0550944	0	0	0		6.1183	0.903639	5.04073	4.91701	0.275932	4.64108	0.0114118	6.32815	0.169765	0.0536337	0.0169136
2006-06-15	2006	6	-8.46998	-11.1089	3456.85		3396.19	47.5952	1.85869	0.989418	4.56437	0.178498	0.286655	4.87227	0.314842	0	0	0		14.9094	4.0364	5.67824	7.54497	0.962658	6.58231	0.107709	2.5773	0.164289	0.0519036	0.0162411
2006-07-15	2006	7	1.25951	0.1767	3466.58		3398.2	47.245	3.70285	0.701466	7.95486	0.371557	0.0273422	7.06771	1.31302	0	0	0		32.8266	7.52272	10.1446	13.714	1.99287	11.7212	0.525202	4.77268	0.169765	0.0536337	0.0164222
2006-08-15	2006	8	7.01981	14.0474	3472.34		3400.43	46.9891	4.29974	0.456787	10.7159	0.227363	0.00617301	8.2443	0.97899	0	0	0		24.3497	11.1875	11.2384	11.7589	2.31603	9.44285	0.397069	3.94642	0.169765	0.0536337	0.0163262
2006-09-15	2006	9	7.17517	17.6062	3472.5		3401.3	46.9769	4.34355	0.82008	10.9768	0.355214	0.00701551	7.15362	0.561876	0	0	0		13.8737	10.3658	10.8474	9.30176	2.24995	7.05181	0.0891271	6.4759	0.164289	0.0519036	0.0157233
2006-10-15	2006	10	-1.73127	9.1753	3463.59		3400.69	47.0009	2.69928	1.08072	6.86612	0.355214	0.0790823	4.75575	0.0646209	0	0	0		2.71095	5.14009	6.25783	5.97452	1.42836	4.54616	0.000613183	7.43617	0.169765	0.0536337	0.0158333
2006-11-15	2006	11	-5.05283	2.7236	3460.27		3400.07	47.0194	2.06018	1.02922	6.46369	0.203582	0.245222	3.16012	0.020821	0	0	0		0.540025	2.05903	1.59138	2.94266	1.06032	1.88234	1.80192e-05	2.22014	0.164289	0.0519036	0.0143055
2006-12-15	2006	12	-7.60823	-1.9959	3457.72		3399.03	47.055	1.05381	1.17326	5.62554	0.0999647	0.421888	3.23752	0.0214085	0	0	0		0.665305	1.78697	1.69609	3.56307	0.554375	3.0087	0	5.05544	0.169765	0.0536337	0.0139785
2007-01-15	2007	1	-9.86451	-6.6044	3455.46		3397.71	47.0949	0.554182	1.32603	4.65642	0.29503	0.52099	3.27634	0.0211299	0	0	0		0.505973	1.17028	2.08208	4.28013	0.261714	4.01842	0	7.75012	0.171164	0.0534865	0.0136505
2007-02-15	2007	2	-9.2222	-6.6529	3456.1		3397.53	47.1829	0.498104	0.737444	4.56641	0.295218	0.95423	4.29509	0.0414369	0	0	0		6.72849	0.919435	3.78914	3.45619	0.218077	3.23812	0	3.19707	0.154599	0.0483104	0.0129452
2007-03-15	2007	3	-9.3751	-5.4421	3455.95		3397.28	47.2575	0.480807	0.72673	3.92231	0.295218	1.63432	4.31454	0.0353377	0	0	0		3.34722	0.919967	4.29314	3.41251	0.228278	3.18423	0	6.60114	0.171164	0.0534865	0.0151695
2007-04-15	2007	4	-11.6431	-11.3018	3453.68		3396.14	47.2825	0.50164	1.25613	3.0138	0.0122901	1.58583	3.86277	0.0251673	0	0	0		1.88854	0.581068	3.02446	3.08928	0.254621	2.83466	0.000680245	3.57567	0.165642	0.0517611	0.016158
2007-05-15	2007	5	-12.3751	-14.0679	3452.95		3395.27	47.3295	0.610434	1.41257	2.67894	0.154286	1.19871	4.25023	0.0440186	0	0	0		4.51692	1.00913	4.69082	4.47656	0.306912	4.16965	0.00910417	6.61293	0.171164	0.0534865	0.0170268
2007-06-15	2007	6	-10.6218	-13.5567	3454.7		3395.32	47.2434	1.51113	1.18047	3.85904	0.178815	0.439338	4.69287	0.27348	0	0	0		13.2361	2.47515	5.7945	7.07311	0.777358	6.29576	0.171286	2.91571	0.165642	0.0517611	0.0164601
2007-07-15	2007	7	0.668883	-1.3323	3465.99		3397.52	46.9607	3.86743	0.677666	8.35196	0.369912	0.0228468	6.70469	1.51742	0	0	0		35.8491	7.56963	9.91654	13.6359	2.08421	11.5517	0.479518	4.11487	0.171164	0.0534865	0.0164691
2007-08-15	2007	8	9.23845	13.5188	3474.56		3400.09	46.6559	5.60523	0.222632	11.3322	0.224334	0.00598679	8.57736	1.84629	0	0	0		27.9673	16.4878	11.1504	14.3109	3.05993	11.2509	0.479549	2.11441	0.171164	0.0534865	0.0164089
2007-09-15	2007	9	7.68051	15.3143	3473		3401.03	46.6406	5.40893	0.42743	10.572	0.352926	0.0138076	7.74344	0.811531	0	0	0		19.7551	11.8157	10.9092	10.0694	2.83187	7.23756	0.135091	4.7217	0.165642	0.0517611	0.015765
2007-10-15	2007	10	0.50404	9.5987	3465.83		3400.77	46.659	3.62205	0.754376	7.67638	0.352926	0.120899	5.64965	0.221352	0	0	0		2.66786	8.03313	6.66361	6.44426	1.94908	4.49518	0.00290294	6.77823	0.171164	0.0534865	0.0157384
2007-11-15	2007	11	-5.44613	0.7044	3459.88		3399.87	46.6714	2.47641	1.00424	6.14764	0.203323	0.191214	3.28764	0.0209739	0	0	0		0.251367	1.89396	1.60875	3.13863	1.29143	1.8472	1.83747e-05	2.09356	0.165642	0.0517611	0.0143385
2007-12-15	2007	12	-8.00002	-4.4592	3457.32		3398.82	46.6966	1.24581	1.13302	5.74749	0.100041	0.307128	3.24858	0.0209127	0	0	0		0.467067	1.78859	1.60126	3.59699	0.660166	2.93683	6.49858e-07	4.78973	0.171164	0.0534865	0.0138511
2008-01-15	2008	1	-9.88506	-6.6026	3455.44		3397.46	46.7009	0.696209	1.30924	4.926	0.309261	0.568741	3.4459	0.0233172	0	0	0		1.90879	1.13538	2.34724	4.46163	0.33874	4.12289	0	7.35651	0.17249	0.0533414	0.0136939
2008-02-15	2008	2	-11.3126	-10.3369	3454.01		3397.08	46.7323	0.450498	1.00661	4.06787	0.309404	0.93369	3.40625	0.0206175	0	0	0		0.861653	1.04636	2.66144	3.43117	0.196344	3.23483	0	5.45785	0.161362	0.0499	0.0131796
2008-03-15	2008	3	-13.2784	-13.9734	3452.05		3396.39	46.76	0.307245	1.17725	2.7507	0.309404	1.03317	3.29875	0.0224351	0	0	0		1.22202	0.331295	3.64498	4.07178	0.129808	3.94197	4.52075e-07	8.33233	0.17249	0.0533414	0.015699
2008-04-15	2008	4	-14.3325	-18.8464	3450.99		3395.29	46.8016	0.377938	1.2405	2.39203	0.0130539	1.23811	3.61063	0.023101	0	0	0		2.0047	0.154444	2.76406	2.74529	0.189775	2.55551	0.000160642	3.35489	0.166926	0.0516207	0.0160848
2008-05-15	2008	5	-15.0484	-21.4495	3450.28		3394.09	46.85	0.435888	1.51314	2.16624	0.163913	1.08379	3.93175	0.0381273	0	0	0		4.89177	0.415582	4.49502	4.44595	0.211648	4.2343	0.00498418	6.51791	0.17249	0.0533414	0.0169341
2008-06-15	2008	6	-5.48819	-13.1841	3459.84		3395.52	46.7509	2.71826	0.760904	6.84618	0.190304	0.34501	5.65211	1.04692	0	0	0		29.9059	4.60214	6.53015	12.1707	1.41708	10.7537	0.228055	1.22113	0.166926	0.0516207	0.0159924
2008-07-15	2008	7	9.72954	10.2376	3475.05		3399.66	46.4554	6.12838	0.193961	11.993	0.388954	0.017079	7.61237	2.60062	0	0	0		36.4192	16.7733	9.83436	16.9134	3.31306	13.6003	0.477598	2.05949	0.17249	0.0533414	0.0164257
2008-08-15	2008	8	15.4966	21.7834	3480.82		3402.17	46.1899	7.01144	0.145786	13.8776	0.233725	0.00585804	9.01194	2.17343	0	0	0		31.8419	20.4237	10.9049	15.7803	3.81639	11.9639	0.433935	1.2	0.17249	0.0533414	0.0163931
2008-09-15	2008	9	8.35508	19.2763	3473.68		3402.57	46.2313	5.34371	0.54151	10.4573	0.36886	0.0161181	7.45537	0.699197	0	0	0		15.3596	9.69141	11.0319	9.23805	2.79401	6.44404	0.0563306	5.24874	0.166926	0.0516207	0.015819
2008-10-15	2008	10	0.564074	12.9315	3465.89		3401.95	46.251	3.17426	0.975214	7.70596	0.368868	0.0710489	5.29568	0.0938495	0	0	0		2.08863	5.92823	6.70458	5.64446	1.69986	3.9446	0.000739905	8.21894	0.17249	0.0533414	0.0159204
2008-11-15	2008	11	-4.23879	5.3334	3461.08		3400.94	46.2639	2.27346	1.20877	6.84655	0.215694	0.152264	3.16631	0.0205664	0	0	0		0.365061	2.17998	1.59992	3.25704	1.17798	2.07907	6.46121e-05	2.26456	0.166926	0.0516207	0.0144051
2008-12-15	2008	12	-7.17784	-0.7326	3458.15		3399.84	46.2855	1.1579	1.27712	6.06157	0.103174	0.216199	3.18529	0.0210436	0	0	0		0.414958	2.07132	1.67741	3.79746	0.612188	3.18527	1.32232e-05	5.34864	0.17249	0.0533414	0.0142538
2009-01-15	2009	1	-9.50053	-3.9161	3455.82		3398.28	46.3654	0.603316	1.34947	5.09999	0.288629	0.379351	3.43484	0.0214969	0	0	0		1.13679	1.29715	2.52187	4.38225	0.290406	4.09184	0	7.81137	0.173745	0.0531597	0.0140563
2009-02-15	2009	2	-11.384	-7.9486	3453.94		3397.68	46.3997	0.403401	1.16321	4.07126	0.288771	0.564281	3.34487	0.0203611	0	0	0		0.89017	0.723086	2.63249	3.63106	0.16864	3.46242	2.24579e-06	5.51747	0.156931	0.0480152	0.0132899
2009-03-15	2009	3	-13.2807	-12.1635	3452.04		3396.97	46.4395	0.25972	1.14821	2.86097	0.288771	0.747137	3.3064	0.0220582	0	0	0		1.32137	0.284404	3.41254	4.00559	0.107304	3.89829	1.24321e-05	7.73324	0.173745	0.0531597	0.0156652
2009-04-15	2009	4	-14.6265	-15.8488	3450.7		3395.85	46.4727	0.368131	1.32444	2.27807	0.0115242	0.946838	3.42683	0.023074	0	0	0		1.13283	0.13023	2.5187	2.85623	0.183458	2.67277	0.000505795	3.87677	0.168141	0.0514449	0.0162759
2009-05-15	2009	5	-15.1382	-18.6948	3450.19		3394.55	46.5344	0.444593	1.51978	2.13862	0.148066	0.843203	3.9537	0.0511332	0	0	0		5.52969	0.480218	4.63672	4.48762	0.217922	4.2697	0.00482163	6.63974	0.173745	0.0531597	0.0171256
2009-06-15	2009	6	-15.1334	-21.2874	3450.19		3394.03	46.5008	0.920002	1.35764	2.45019	0.171635	0.461804	4.19557	0.100879	0	0	0		7.67345	1.21258	4.36651	4.79968	0.466723	4.33296	0.0890298	4.05318	0.168141	0.0514449	0.0168735
2009-07-15	2009	7	-5.67711	-13.9328	3459.65		3395.03	46.212	2.72505	0.942118	6.89951	0.350368	0.0635219	6.62166	0.806685	0	0	0		27.4546	3.90835	10.6185	11.8156	1.45285	10.3628	0.447695	5.68666	0.173745	0.0531597	0.0167939
2009-08-15	2009	8	1.47303	1.5877	3466.8		3396.78	45.9089	4.18516	0.431945	10.0299	0.209702	0.00599822	7.7914	1.45053	0	0	0		27.5401	12.3212	10.9531	12.1628	2.28139	9.88145	0.460099	2.61787	0.173745	0.0531597	0.0166424
2009-09-15	2009	9	3.09702	6.0621	3468.42		3398.23	45.8871	4.89791	0.497447	10.4606	0.334956	0.00825523	7.28744	0.814886	0	0	0		15.5608	13.6139	10.7794	9.84791	2.56255	7.28536	0.102627	6.00667	0.168141	0.0514449	0.0160065
2009-10-15	2009	10	-2.41241	1.0193	3462.91		3397.99	45.9561	3.18726	0.829408	8.24822	0.334956	0.0945281	5.98112	0.290054	0	0	0		9.07241	5.05414	6.91967	7.17924	1.71321	5.46604	0.00165663	5.38366	0.173745	0.0531597	0.0158171
2009-11-15	2009	11	-8.61636	-4.5971	3456.71		3397.33	45.9811	2.43809	0.90123	6.01666	0.19571	0.194457	3.62794	0.0225703	0	0	0		1.80057	2.54334	2.25077	3.0696	1.26833	1.80127	7.10924e-06	1.70196	0.168141	0.0514449	0.0143826
2009-12-15	2009	12	-10.9234	-8.3478	3454.4		3396.21	45.9994	1.39234	1.11862	5.86812	0.0937328	0.298581	3.39779	0.0216476	0	0	0		0.561789	1.92265	1.87752	3.66616	0.741385	2.92478	0	4.91928	0.173745	0.0531597	0.0140957
2010-01-15	2010	1	-13.0785	-11.464	3452.25		3395.07	46.0149	0.699361	1.18916	4.99922	0.289124	0.447112	3.50983	0.0231654	0	0	0		0.894442	1.37149	2.13917	4.08631	0.342599	3.74371	0	7.28417	0.193052	0.0584632	0.0135873
2010-02-15	2010	2	-14.3403	-14.2964	3450.98		3394.64	46.0757	0.482016	0.979507	4.09631	0.28929	0.816811	3.58314	0.024487	0	0	0		2.14086	0.894838	3.01144	3.46098	0.20794	3.25304	0	4.89622	0.17437	0.0528055	0.0132642
2010-03-15	2010	3	-16.2631	-19.7523	3449.06		3393.97	46.102	0.313939	1.22791	2.65899	0.28929	0.968261	3.5071	0.0256237	0	0	0		0.815595	0.324565	3.85018	4.22576	0.134855	4.0909	5.26102e-05	8.70406	0.193052	0.0584632	0.0161464
2010-04-15	2010	4	-18.5454	-24.9394	3446.78		3392.56	46.1334	0.359905	1.54153	1.90933	0.0116825	0.845642	3.38726	0.0248213	0	0	0		1.20202	0.0939864	2.75569	3.16019	0.179576	2.98061	0.00157541	4.26371	0.186825	0.0565773	0.0167187
2010-05-15	2010	5	-19.0127	-28.3003	3446.31		3391.38	46.1733	0.419997	1.69331	1.80106	0.153342	0.761303	3.89158	0.0413397	0	0	0		3.90683	0.392435	4.6582	4.47202	0.203194	4.26882	0.0102367	7.61041	0.193052	0.0584632	0.0174632
2010-06-15	2010	6	-18.6682	-27.7662	3446.66		3390.76	46.1424	0.991781	1.55134	2.27746	0.177247	0.437286	4.16608	0.154291	0	0	0		8.24791	1.313	4.6005	5.30168	0.503772	4.7979	0.1019	3.91349	0.186825	0.0565773	0.0169119
2010-07-15	2010	7	-7.03507	-16.6006	3458.29		3391.73	45.8982	3.29368	1.20554	7.43486	0.361424	0.0899544	6.94304	1.33111	0	0	0		34.4807	6.01242	10.3877	14.2642	1.77295	12.4913	0.459168	5.4976	0.193052	0.0584632	0.0168215
2010-08-15	2010	8	3.10416	-0.3363	3468.43		3394.59	45.5676	5.2028	0.222649	11.8044	0.215423	0.00693066	9.10887	1.71196	0	0	0		32.998	14.5655	11.1614	14.8817	2.84228	12.0394	0.53651	1.6828	0.193052	0.0584632	0.0166237
2010-09-15	2010	9	9.5063	10.2762	3474.83		3397.09	45.559	7.09223	0.257489	14.1447	0.343657	0.00631637	8.53871	1.79277	0	0	0		23.8986	16.3252	10.597	13.6306	3.73433	9.89623	0.15741	2.8604	0.186825	0.0565773	0.0158667
2010-10-15	2010	10	-3.77908	3.3141	3461.54		3396.99	45.586	4.0811	0.883441	8.08829	0.343657	0.0405547	5.30528	0.229483	0	0	0		3.31097	9.42394	7.03333	6.51592	2.20469	4.31123	0.00202128	7.28353	0.193052	0.0584632	0.016089
2010-11-15	2010	11	-8.3133	-3.6643	3457.01		3396.34	45.601	2.86732	1.02327	7.18514	0.200509	0.164635	3.60041	0.0254367	0	0	0		1.94001	2.88973	2.35041	3.53845	1.49825	2.0402	5.37021e-05	1.96158	0.186825	0.0565773	0.0146688
2010-12-15	2010	12	-11.7069	-8.0591	3453.62		3395.4	45.6336	1.63046	1.0821	6.09185	0.0960072	0.227474	3.43612	0.0233426	0	0	0		0.715678	2.38014	1.7497	3.72828	0.873774	2.8545	0	4.83439	0.193052	0.0584632	0.013954
2011-01-15	2011	1	-13.928		3451.4		3394.39	45.6466	0.807101	1.20123	4.8996	0.299046	0.509517	3.61416	0.0237106	0	0	0		0.933073	1.52704	2.1405	4.19277	0.402959	3.78981	0	7.39349	0.195432	0.0587004	0.0135256
2011-02-15	2011	2	-15.0948	-12.0084	3450.23		3394.01	45.7277	0.549375	0.989417	4.12168	0.299098	0.955604	3.55492	0.0248489	0	0	0		2.25864	0.601229	2.79745	3.6255	0.241869	3.38363	0	4.69271	0.176519	0.0530197	0.0131533
2011-03-15	2011	3	-16.2473	-17.5766	3449.08		3393.49	45.7732	0.389145	1.10714	3.02965	0.299098	1.39237	3.56634	0.0255509	0	0	0		1.23371	0.373958	3.58093	3.97431	0.176612	3.79769	1.58226e-06	7.8576	0.195432	0.0587004	0.0157266
2011-04-15	2011	4	-17.8907	-22.9313	3447.43		3392.42	45.8218	0.401696	1.15901	2.44087	0.0121228	1.5471	3.60075	0.0260592	0	0	0		2.35575	0.337768	2.76073	2.80137	0.202942	2.59843	6.062e-05	3.15748	0.189128	0.0568068	0.0160629
2011-05-15	2011	5	-18.2159	-24.4492	3447.11		3391.39	45.8564	0.542714	1.48324	2.19914	0.159092	1.29748	4.11611	0.0647725	0	0	0		5.41958	0.812732	4.77937	4.81979	0.269646	4.55015	0.00637448	6.90938	0.195432	0.0587004	0.017293
2011-06-15	2011	6	-13.7101		3451.61		3391.91	45.8584	1.88334	1.07446	4.23309	0.183407	0.680468	5.06648	0.719124	0	0	0		24.414	1.87683	5.83079	9.28733	0.974809	8.31252	0.112536	2.45864	0.189128	0.0568068	0.0165021
2011-07-15	2011	7	2.77967	-1.4822	3468.1		3395.38	45.6272	5.15023	0.393767	11.5502	0.375154	0.0992602	7.43776	2.08995	0	0	0		32.958	12.3706	10.2008	16.6933	2.7794	13.9139	0.421688	2.9424	0.195432	0.0587004	0.0167332
2011-08-15	2011	8	13.3173	15.4662	3478.64		3398.74	45.3906	7.19458	0.17121	15.3217	0.223853	0.00817857	9.05167	2.54038	0	0	0		36.344	20.9605	10.9216	17.9698	3.92334	14.0465	0.438471	2.22118	0.195432	0.0587004	0.0166107
2011-09-15	2011	9	12.0353	20.4531	3477.36		3400.15	45.3371	6.99517	0.406938	14.7209	0.355416	0.00706257	8.30513	1.08229	0	0	0		22.4318	15.252	10.7817	12.8088	3.67041	9.13835	0.144657	3.3145	0.189128	0.0568068	0.0159903
2011-10-15	2011	10	-1.27813	11.3607	3464.05		3399.63	45.3599	4.10141	0.992515	8.28975	0.355416	0.0563751	5.14011	0.115245	0	0	0		1.41902	9.66693	6.53036	6.46425	2.20733	4.25692	0.0010956	8.6079	0.195432	0.0587004	0.0161026
2011-11-15	2011	11	-6.06698	6.3333	3459.26		3398.55	45.3755	2.82373	1.15065	7.76448	0.206866	0.16786	3.19134	0.0246992	0	0	0		0.370675	2.43493	1.49179	3.5645	1.46766	2.09684	6.89596e-05	2.19376	0.189128	0.0568068	0.014613
2011-12-15	2011	12	-9.37424	-3.3872	3455.95		3397.35	45.386	1.46234	1.23456	6.96859	0.0996732	0.193221	3.23294	0.0235202	0	0	0		0.38679	2.32804	1.56393	3.89883	0.776796	3.12203	2.03434e-06	5.02822	0.195432	0.0587004	0.0140101
2012-01-15	2012	1	-10.8403	-3.7029	3454.48		3396.13	45.4095	0.81513	1.01595	6.16854	0.294519	0.568348	4.05809	0.0262272	0	0	0		3.05442	1.78016	2.88758	3.92248	0.406612	3.51587	0	6.74307	0.197614	0.058895	0.0136946
2012-02-15	2012	2	-12.7648	-7.8076	3452.56		3395.53	45.487	0.539573	1.03457	4.96316	0.294767	1.03888	3.64589	0.0242238	0	0	0		1.57468	0.93173	2.86728	3.6673	0.242371	3.42493	0	5.20502	0.184865	0.0550954	0.0135601
2012-03-15	2012	3	-14.6651	-12.7808	3450.66		3394.76	45.5362	0.347188	1.11899	3.72961	0.294767	1.31879	3.52426	0.0259576	0	0	0		1.22051	0.364846	3.34394	4.02551	0.153346	3.87216	0	7.70783	0.197614	0.058895	0.0156212
2012-04-15	2012	4	-15.9508	-15.386	3449.37		3393.55	45.5847	0.412941	1.19259	3.2849	0.0121897	1.55312	3.75248	0.0284518	0	0	0		2.50339	0.309512	2.86058	2.90998	0.209041	2.70094	0.000140626	3.34506	0.19124	0.0569952	0.0162861
2012-05-15	2012	5	-17.4943		3447.83		3392.39	45.6126	0.391848	1.55959	2.38877	0.155567	1.47528	3.81863	0.0339798	0	0	0		1.95412	0.40201	4.03257	4.00687	0.186656	3.82021	0.00255544	7.9225	0.197614	0.058895	0.0175875
2012-06-15	2012	6	-17.7872	-27.8152	3447.54		3391.54	45.5585	0.963251	1.61753	2.77107	0.180662	0.623242	4.12706	0.157922	0	0	0		7.36984	0.958383	4.63357	5.3815	0.488279	4.89322	0.123678	4.36955	0.19124	0.0569952	0.0172368
2012-07-15	2012	7	-6.24166	-14.4842	3459.08		3391.02	45.2779	3.68836	1.32967	8.80663	0.366675	0.0778491	7.0614	1.45239	0	0	0		36.0426	8.06609	10.1255	15.6786	1.98468	13.6939	0.469031	6.0345	0.197614	0.058895	0.0169238
2012-08-15	2012	8	6.67265	4.2545	3472		3394.78	44.9708	6.2957	0.19464	14.2561	0.218575	0.00635807	9.11955	2.15649	0	0	0		36.3861	15.9735	10.85	17.3729	3.43105	13.9419	0.473483	1.42696	0.197614	0.058895	0.0166749
2012-09-15	2012	9	8.89246	13.865	3474.22		3396.86	44.9481	6.94422	0.344588	15.2512	0.348363	0.00689431	8.2172	1.30023	0	0	0		20.8064	15.1118	10.7963	12.8159	3.63321	9.18265	0.130547	4.04153	0.19124	0.0569952	0.0160665
2012-10-15	2012	10	-4.15091		3461.17		3396.47	44.9673	3.77925	1.13221	9.19353	0.348363	0.0520317	5.10824	0.125257	0	0	0		1.88694	9.00382	6.04659	6.62935	2.0314	4.59795	0.00030289	7.52588	0.197614	0.058895	0.0160028
2012-11-15	2012	11	-9.79035	-4.8296	3455.53		3395.7	44.9805	2.56968	0.969325	7.7123	0.204084	0.154183	3.22308	0.0233483	0	0	0		0.557575	3.41302	1.50858	3.24352	1.33544	1.90808	5.46865e-06	2.34568	0.19124	0.0569952	0.0143628
2012-12-15	2012	12	-12.878	-9.7349	3452.45		3394.58	45.0017	1.31993	1.14717	6.73884	0.0965029	0.272324	3.26426	0.0238429	0	0	0		0.479068	1.9379	1.5584	3.68325	0.702066	2.98119	5.65094e-08	5.06627	0.197614	0.058895	0.0140631
2013-01-15	2013	1	-14.6753	-11.6172	3450.65		3393.28	45.0467	0.715452	1.17476	5.97596	0.289045	0.544208	3.58938	0.0309055	0	0	0		2.13371	1.25825	2.15837	4.2893	0.353323	3.93598	0	7.14213	0.199678	0.05905	0.0136195
2013-02-15	2013	2	-13.5242	-11.8513	3451.8		3393.1	45.1568	0.685454	0.704761	6.03353	0.289198	1.38417	4.39156	0.0518919	0	0	0		5.72715	1.12549	3.57105	3.64415	0.3122	3.33194	0	3.17647	0.180354	0.0533355	0.013202
2013-03-15	2013	3	-15.3971		3449.93		3392.57	45.1791	0.496651	0.9599	4.55073	0.289198	1.74313	4.11631	0.0246842	0	0	0		1.5511	1.11501	4.23419	3.71676	0.237449	3.47931	1.15844e-06	7.59012	0.199678	0.05905	0.0158295
2013-04-15	2013	4	-17.6987	-19.9334	3447.62		3391.61	45.2126	0.482366	1.15672	3.39376	0.0122631	1.78875	3.93834	0.0268492	0	0	0		2.35003	0.436974	2.9568	2.98747	0.244289	2.74318	0.000167559	3.35546	0.193236	0.0571452	0.0163062
2013-05-15	2013	5	-18.9633	-23.1988	3446.36		3390.45	45.2529	0.53718	1.55861	2.72305	0.152507	1.45858	4.1484	0.0796993	0	0	0		3.91749	0.711633	4.28912	4.6126	0.265628	4.34697	0.00779549	7.75919	0.199678	0.05905	0.0176006
2013-06-15	2013	6	-10.7633	-19.0491	3454.56		3391.2	45.2128	2.75038	1.01336	7.12692	0.177909	0.451178	5.47006	1.15748	0	0	0		29.4452	3.17861	6.60258	12.0802	1.44148	10.6387	0.208006	1.6238	0.193236	0.0571452	0.0165987
2013-07-15	2013	7	3.84038	2.8322	3469.16		3394.72	44.9174	5.71105	0.477052	12.9984	0.362942	0.0677611	7.51806	2.39497	0	0	0		35.4533	16.1324	10.295	17.4357	3.09946	14.3362	0.512455	3.80122	0.199678	0.05905	0.0168739
2013-08-15	2013	8	13.322		3478.65		3397.79	44.6128	6.95357	0.218101	17.5922	0.217498	0.00771488	9.11174	2.14316	0	0	0		33.1312	16.936	10.8226	17.3612	3.78758	13.5736	0.463196	1.57105	0.199678	0.05905	0.0167335
2013-09-15	2013	9	4.45985		3469.78		3398.34	44.5695	5.59273	0.730334	12.9278	0.345543	0.00574241	6.91055	0.362255	0	0	0		11.7127	15.8051	11.0372	8.95066	2.92249	6.02818	0.108439	6.47943	0.193236	0.0571452	0.0162612
2013-10-15	2013	10	0.247838	11.0059	3465.57		3398.28	44.6285	4.02	0.424968	10.4438	0.345543	0.0466649	7.06777	0.311844	0	0	0		11.2327	7.83379	7.71301	7.08859	2.16125	4.92734	0.00404754	4.0862	0.199678	0.05905	0.0161302
2013-11-15	2013	11	-7.3574	3.8187	3457.97		3397.47	44.6419	2.98441	0.819083	7.80232	0.201137	0.151663	3.86676	0.0248971	0	0	0		0.275933	3.45726	2.00322	3.28635	1.55101	1.73534	6.28894e-07	2.19062	0.193236	0.0571452	0.0144222
2013-12-15	2013	12	-10.6928	-1.3914	3454.63		3396.33	44.6611	1.59915	1.05834	7.19749	0.0959722	0.207995	3.45782	0.0241276	0	0	0		0.620106	1.97731	1.76224	3.7498	0.852135	2.89766	0	4.83695	0.199678	0.05905	0.0141859
2014-01-15	2014	1	-12.0732	-4.0084	3453.25		3395.13	44.708	0.885073	1.0086	6.61377	0.286873	0.483688	4.10502	0.0328017	0	0	0		3.99273	1.68379	2.83111	4.18863	0.445972	3.74266	0	6.37444	0.201622	0.0591291	0.013835
2014-02-15	2014	2	-13.0077		3452.32		3394.75	44.7905	0.623541	0.739927	5.9125	0.287124	0.937651	4.23516	0.0353466	0	0	0		5.42633	1.57637	3.38703	3.34321	0.279304	3.0639	0	3.46895	0.18211	0.0534069	0.0130026
2014-03-15	2014	3	-13.5365	-5.6694	3451.79		3394.37	44.8371	0.594503	0.730267	5.0288	0.287124	1.41122	4.49765	0.0289478	0	0	0		2.28729	0.953258	4.29693	3.32827	0.290465	3.03781	0	6.61134	0.201622	0.0591291	0.0155973
2014-04-15	2014	4	-16.274	-12.478	3449.05		3393.32	44.8782	0.506722	1.20665	3.70273	0.0122237	1.48513	3.91824	0.0244476	0	0	0		1.25383	0.46947	2.68956	2.90965	0.256714	2.65293	8.80452e-05	3.55323	0.195118	0.0572217	0.0163728
2014-05-15	2014	5	-17.7712	-16.701	3447.55		3392.24	44.9269	0.492461	1.50528	2.6975	0.151569	1.35199	4.13503	0.0513085	0	0	0		4.05758	0.495076	4.25442	4.35331	0.242557	4.11075	0.00401895	7.08549	0.201622	0.0591291	0.0175212
2014-06-15	2014	6	-17.1304	-19.286	3448.19		3391.85	44.8683	1.19146	1.36633	3.33968	0.176681	0.704259	4.50226	0.197034	0	0	0		8.62429	1.7059	4.95443	5.81865	0.609199	5.20945	0.120635	3.95613	0.195118	0.0572217	0.0172335
2014-07-15	2014	7	-8.05558		3457.27		3392.15	44.5928	3.28562	1.04558	7.85039	0.357896	0.123999	6.74982	1.11133	0	0	0		30.1217	5.98833	10.0747	13.4937	1.76509	11.7287	0.471957	5.80295	0.201622	0.0591291	0.0171644
2014-08-15	2014	8	1.43933	5.0263	3466.76		3394.64	44.3047	4.87984	0.353029	12.8213	0.213623	0.00808997	8.18138	1.36278	0	0	0		26.3568	15.5885	11.2398	13.0946	2.65307	10.4416	0.434349	3.4064	0.201622	0.0591291	0.0170088
2014-09-15	2014	9	-2.43602	6.4147	3462.89		3395.03	44.2642	4.40589	0.581221	10.2482	0.340806	0.00625998	7.54424	0.463742	0	0	0		16.4449	9.0358	10.8433	8.95058	2.2986	6.65198	0.111763	4.77485	0.195118	0.0572217	0.0162525
2014-10-15	2014	10	-9.28594	1.4671	3456.04		3394.22	44.312	2.70403	0.981794	7.84519	0.340806	0.169568	5.35689	0.107825	0	0	0		5.33761	4.10425	6.52354	6.08491	1.44464	4.64027	0.000293623	6.14904	0.201622	0.0591291	0.0162728
2014-11-15	2014	11	-13.7293	-6.2554	3451.59		3393.62	44.3196	2.15577	0.835433	6.70715	0.199631	0.362838	3.37074	0.0245105	0	0	0		0.221873	3.23735	1.78551	2.90951	1.11863	1.79087	2.41714e-05	2.4404	0.195118	0.0572217	0.0147324
2014-12-15	2014	12	-15.7832		3449.54		3392.69	44.3521	1.13305	1.02606	6.1005	0.0945447	0.517549	3.60558	0.0247467	0	0	0		1.8367	1.32893	1.96557	3.46869	0.600667	2.86802	0	4.5453	0.201622	0.0591291	0.0140139
2015-01-15	2015	1	-16.5092	-16.1975	3448.81		3391.8	44.3943	0.676679	0.943399	5.47689	0.290426	0.981991	4.22584	0.0290074	0	0	0		3.78683	1.38785	3.03223	3.87197	0.333864	3.5381	0	6.16776	0.224876	0.0654168	0.0138449
2015-02-15	2015	2	-17.8739	-16.6928	3447.45		3391.46	44.4476	0.481411	0.963433	4.46842	0.290603	1.39038	3.91985	0.028757	0	0	0		2.75479	0.74602	3.39318	3.51812	0.206837	3.31128	0	5.10267	0.203114	0.0590862	0.0135528
2015-03-15	2015	3	-16.3559	-13.8664	3448.97		3391.3	44.5417	0.615502	0.715529	4.66923	0.290603	2.14087	4.62426	0.0666891	0	0	0		6.95971	0.592011	4.73477	4.33185	0.304852	4.027	3.95566e-07	4.96241	0.224876	0.0654168	0.0156795
2015-04-15	2015	4	-17.1879	-18.2426	3448.14		3390.78	44.5933	0.698909	0.863276	4.24395	0.0125916	2.45158	4.46215	0.0317858	0	0	0		3.67094	1.46799	3.49554	2.98779	0.359879	2.62791	0.000111424	2.97724	0.217622	0.0633066	0.0161835
2015-05-15	2015	5	-19.129	-18.2864	3446.19		3389.86	44.6208	0.681076	1.4022	2.81764	0.15435	2.23739	4.37442	0.051514	0	0	0		2.9474	1.41356	4.51718	4.3999	0.344426	4.05548	0.00433678	7.7752	0.224876	0.0654168	0.0177388
2015-06-15	2015	6	-18.5926		3446.73		3389.5	44.6439	1.38185	1.34072	3.41704	0.179987	1.38013	4.58426	0.303329	0	0	0		13.7452	1.25876	5.25679	7.1389	0.710384	6.42851	0.083194	3.06121	0.217622	0.0633066	0.0170649
2015-07-15	2015	7	-5.36422	-8.062	3459.96		3391.89	44.4372	4.04548	0.63457	9.63374	0.365192	0.296838	7.13344	1.52641	0	0	0		31.4439	8.14218	10.2835	14.565	2.18236	12.3826	0.351227	4.52985	0.224876	0.0654168	0.0171176
2015-08-15	2015	8	1.10198	3.6371	3466.43		3393.96	44.1885	4.89883	0.182262	13.3206	0.218367	0.0210428	8.48167	1.15398	0	0	0		26.9318	12.8252	11.2118	12.3017	2.66164	9.6401	0.392365	1.88082	0.224876	0.0654168	0.0170351
2015-09-15	2015	9	-6.5101	0.1876	3458.81		3393.87	44.1118	3.70023	1.2059	9.2316	0.347458	0.0125969	6.08186	0.248321	0	0	0		8.09468	9.00405	10.7933	7.56887	1.91529	5.65358	0.123722	8.41687	0.217622	0.0633066	0.0165639
2015-10-15	2015	10	-13.1129		3452.21		3393.19	44.1357	2.09039	1.3328	6.7644	0.347463	0.0632404	4.25168	0.0345555	0	0	0		2.40528	2.45972	5.59991	5.65848	1.09906	4.55942	0.00125143	7.99878	0.224876	0.0654168	0.016554
2015-11-15	2015	11	-15.4344		3449.89		3392.6	44.1484	1.75194	1.03632	6.65562	0.203056	0.251409	3.21332	0.0263595	0	0	0		0.336983	1.85312	1.86704	2.89149	0.897613	1.99388	1.00076e-05	2.61771	0.217622	0.0633066	0.0150588
2015-12-15	2015	12	-18.1023	-22.4016	3447.22		3391.4	44.1699	0.907126	1.19195	5.86192	0.0958954	0.326077	3.23741	0.0270935	0	0	0		0.479815	1.66907	1.61601	3.58419	0.476326	3.10786	0	5.33936	0.224876	0.0654168	0.0143195
2016-01-15	2016	1	-20.1831	-26.17	3445.14		3390.07	44.2465	0.492522	1.28539	4.82809	0.292683	0.452087	3.44878	0.0270929	0	0	0		1.3919	1.17062	2.53039	4.28887	0.229636	4.05923	0	7.63761	0.226804	0.0654571	0.0142203
2016-02-15	2016	2	-22.002	-27.7456	3443.32		3389.61	44.2798	0.342952	1.14287	3.65679	0.292892	0.607039	3.36237	0.0265197	0	0	0		0.924434	0.692336	2.90709	3.76328	0.142227	3.62105	0	6.08522	0.212171	0.0612341	0.0141537
2016-03-15	2016	3	-23.3249	-30.2682	3442		3389.09	44.3254	0.26336	1.08133	2.57141	0.292892	0.815864	3.52802	0.0290851	0	0	0		2.49251	0.207523	4.10796	4.07352	0.109297	3.96422	6.07476e-06	7.57568	0.226804	0.0654571	0.0162601
2016-04-15	2016	4	-25.2237		3440.1		3387.8	44.3577	0.325934	1.33484	1.84601	0.0126319	0.894707	3.49762	0.0271407	0	0	0		0.796947	0.139726	2.66073	2.96568	0.160885	2.80479	0.000610766	4.1736	0.219488	0.0633456	0.017013
2016-05-15	2016	5	-25.134	-38.9727	3440.19		3386.68	44.4035	0.480024	1.51539	1.87337	0.155493	0.826884	4.19391	0.0605799	0	0	0		6.17118	0.3424	5.04986	4.85298	0.236244	4.61674	0.00760684	6.79871	0.226804	0.0654571	0.0176846
2016-06-15	2016	6	-22.7007	-37.4889	3442.62		3386.76	44.2924	1.3694	1.15241	3.63928	0.181521	0.263892	4.70276	0.258888	0	0	0		13.778	1.80118	5.89785	6.99141	0.704004	6.28741	0.203326	3.2257	0.219488	0.0633456	0.0172011
2016-07-15	2016	7	-3.77997	-18.5759	3461.54		3390.26	43.9997	5.14318	0.444529	11.3786	0.36847	0.0172252	7.52101	2.40596	0	0	0		44.6217	10.0758	10.2004	17.8057	2.78036	15.0253	0.535976	2.55853	0.226804	0.0654571	0.0170919
2016-08-15	2016	8	7.20412	2.4555	3472.53		3393.9	43.7163	7.04847	0.171246	16.0771	0.22032	0.00829773	9.0673	2.31571	0	0	0		31.9648	17.6075	11.2253	17.4418	3.82757	13.6142	0.414828	2.18023	0.226804	0.0654571	0.0170838
2016-09-15	2016	9	2.19016		3467.51		3394.74	43.6272	6.39295	0.420412	13.5358	0.35031	0.00678634	7.68768	0.757487	0	0	0		18.2922	18.2438	10.8531	10.3934	3.3377	7.05568	0.16944	4.02578	0.219488	0.0633456	0.0164607
2016-10-15	2016	10	-6.80229		3458.52		3394.34	43.6493	4.25744	0.629536	9.10478	0.35031	0.0186298	5.98753	0.18673	0	0	0		4.97707	6.49451	7.5388	6.46825	2.28444	4.18381	0.00515741	6.86737	0.226804	0.0654571	0.0165438
2016-11-15	2016	11	-13.5571	-11.8086	3451.77		3393.26	43.6527	2.80696	1.05974	7.44636	0.204804	0.0613234	3.24863	0.0269234	0	0	0		0.0639528	2.4503	1.56318	3.40533	1.45622	1.94912	6.7155e-05	2.17737	0.219488	0.0633456	0.0148527
2016-12-15	2016	12	-16.5545	-19.8639	3448.77		3392.2	43.6614	1.4141	1.17144	6.94392	0.0968888	0.0806898	3.17679	0.0266569	0	0	0		0.223931	2.25755	1.55758	3.86026	0.751436	3.10882	4.28623e-05	5.01535	0.226804	0.0654571	0.0144817
2017-01-15	2017	1	-18.858	-18.8828	3446.47		3390.94	43.6777	0.735683	1.27761	5.73295	0.294955	0.270794	3.51004	0.0305798	0	0	0		2.28734	1.4977	2.4677	4.52221	0.361193	4.16101	0	7.40883	0.228601	0.0654974	0.0142194
2017-02-15	2017	2	-20.4907		3444.83		3390.5	43.7066	0.496349	1.10667	4.59266	0.29517	0.590393	3.52212	0.0264386	0	0	0		0.696723	0.86058	2.81521	3.60536	0.213264	3.3921	0	5.63911	0.206478	0.059159	0.0136455
2017-03-15	2017	3	-21.9666	-33.3885	3443.36		3389.88	43.7677	0.333741	1.05621	3.47118	0.29517	0.903156	3.62071	0.0309705	0	0	0		2.2263	0.60906	3.70815	3.99565	0.147069	3.84858	2.1191e-06	7.3014	0.228601	0.0654974	0.0159501
2017-04-15	2017	4	-23.9104	-35.2073	3441.41		3388.56	43.8189	0.406232	1.28734	2.59285	0.0126717	1.00374	3.69413	0.0336502	0	0	0		2.32904	0.315956	3.0206	3.15257	0.203864	2.94871	0.000688612	3.53234	0.221227	0.0633846	0.0168408
2017-05-15	2017	5	-24.3603	-36.2117	3440.96		3387.46	43.8709	0.526822	1.54891	2.28736	0.156684	0.957828	4.10458	0.049689	0	0	0		4.96619	0.831967	4.88219	4.74503	0.260838	4.48419	0.00684139	7.1537	0.228601	0.0654974	0.0178272
2017-06-15	2017	6	-22.6417	-38.762	3442.68		3387.41	43.8182	1.31931	1.15312	3.52059	0.183048	0.409026	4.68346	0.18751	0	0	0		13.6663	1.56892	5.73472	6.51177	0.677457	5.83431	0.132522	3.05169	0.221227	0.0633846	0.0171981
2017-07-15	2017	7	-7.80877		3457.51		3390.12	43.5117	4.30656	0.379638	9.68376	0.371738	0.0389729	7.33632	1.76162	0	0	0		35.1588	11.0813	10.1007	14.8962	2.32253	12.5737	0.507464	2.60272	0.228601	0.0654974	0.0171824
2017-08-15	2017	8	-2.07127		3463.25		3392.22	43.1539	5.32108	0.151978	12.1606	0.222263	0.00558208	8.6111	1.40778	0	0	0		28.0458	14.7723	11.1836	12.5108	2.90125	9.6096	0.530786	1.37257	0.228601	0.0654974	0.017191
2017-09-15	2017	9	-7.50472		3457.82		3392.52	43.0485	4.1872	0.624278	9.38336	0.353143	0.00548792	7.26414	0.430241	0	0	0		14.0406	7.1677	11.4534	8.18935	2.19214	5.99721	0.187123	6.18913	0.221227	0.0633846	0.0166554
2017-10-15	2017	10	-13.0633		3452.26		3392.17	43.0635	2.68355	1.07811	7.61892	0.353143	0.0170778	5.17931	0.0993157	0	0	0		2.65491	4.52395	6.86446	5.80162	1.43176	4.36986	0.00518287	8.19539	0.228601	0.0654974	0.0167338
2017-11-15	2017	11	-17.6013		3447.72		3391.33	43.0774	2.06138	1.19969	6.49886	0.206553	0.0815182	3.23876	0.0272826	0	0	0		0.179424	1.62945	1.47646	3.20672	1.0658	2.14092	1.84293e-05	2.42122	0.221227	0.0633846	0.014865
2017-12-15	2017	12	-20.0871		3445.24		3390.27	43.0996	1.05689	1.22523	5.99888	0.0973591	0.164648	3.295	0.0270206	0	0	0		0.503748	1.6531	1.69422	3.76402	0.559763	3.20426	5.28362e-06	5.25866	0.228601	0.0654974	0.0145579
2018-01-15	2018	1	-22.3884		3442.94		3388.99	43.1454	0.554614	1.30652	4.95423	0.297208	0.245448	3.41491	0.0270458	0	0	0		0.769696	1.34928	2.08874	4.36427	0.263742	4.10053	2.82547e-08	7.6511	0.230351	0.065494	0.014025
2018-02-15	2018	2	-24.123		3441.2		3388.58	43.187	0.369379	1.10106	3.73706	0.297434	0.485694	3.41627	0.0261527	0	0	0		1.32669	0.753934	2.94508	3.57798	0.151482	3.42649	0	5.59279	0.208059	0.0591559	0.0137463
2018-03-15	2018	3	-25.8297		3439.49		3387.9	43.2268	0.261261	1.22385	2.44314	0.297434	0.697824	3.41713	0.0289456	0	0	0		1.24715	0.351519	3.59789	4.2835	0.106705	4.1768	3.67311e-07	8.08098	0.230351	0.065494	0.0163894
2018-04-15	2018	4	-26.8104		3438.51		3386.78	43.2668	0.363888	1.24165	2.11175	0.0127084	0.918761	3.78889	0.0314289	0	0	0		3.29969	0.248146	3.14746	3.03596	0.183215	2.85274	0.000241031	3.38814	0.22292	0.0633813	0.0167124
2018-05-15	2018	5	-26.809		3438.51		3385.71	43.3074	0.513513	1.50293	2.15058	0.158413	0.886419	4.22602	0.0554039	0	0	0		4.19439	0.68615	4.72238	4.58353	0.253636	4.3299	0.00556094	7.40989	0.230351	0.065494	0.017865
2018-06-15	2018	6	-25.6257	-42.6238	3439.7		3385.34	43.2271	1.29939	1.29529	3.30763	0.184557	0.224723	4.62573	0.19399	0	0	0		12.4461	1.75528	5.79934	6.62537	0.66733	5.95804	0.177995	3.31795	0.22292	0.0633813	0.0174036
2018-07-15	2018	7	-12.983	-35.4594	3452.34		3387.56	42.8796	3.8467	0.79429	8.41776	0.374969	0.0132391	6.95718	1.49728	0	0	0		37.4184	5.47369	10.3039	14.7999	2.07394	12.7259	0.580275	4.61158	0.230351	0.065494	0.0174006
2018-08-15	2018	8	0.412729		3465.74		3391.15	42.5227	6.33757	0.152891	13.9707	0.224181	0.00518403	9.05618	2.32105	0	0	0		35.2025	19.2196	10.9993	16.8811	3.46846	13.4127	0.577	1.16235	0.230351	0.065494	0.0172115
2018-09-15	2018	9	0.0924494		3465.42		3393.03	42.4897	6.69412	0.419679	13.434	0.355942	0.00746371	7.75566	1.2309	0	0	0		15.3417	15.7618	10.8456	11.6222	3.51477	8.10745	0.12428	5.81936	0.22292	0.0633813	0.016503
2018-10-15	2018	10	-12.4298	-17.1909	3452.89		3392.42	42.5062	3.26879	1.17467	8.26354	0.355942	0.0566056	4.77875	0.0663306	0	0	0		1.51802	4.53529	5.86461	6.16811	1.75877	4.40935	0.00024073	7.98864	0.230351	0.065494	0.0165056
2018-11-15	2018	11	-17.3263	-21.1101	3448		3391.61	42.5272	2.14798	1.13492	7.00955	0.208279	0.164672	3.1653	0.0268911	0	0	0		0.36429	2.25219	1.45969	3.15324	1.11443	2.03881	2.52925e-05	2.158	0.22292	0.0633813	0.0149787
2018-12-15	2018	12	-19.7104	-25.6248	3445.61		3390.46	42.5446	1.19162	1.23835	6.51392	0.0980841	0.255248	3.28069	0.0270357	0	0	0		0.62966	2.10515	1.60949	3.80983	0.633478	3.17635	0	4.89353	0.230351	0.065494	0.014304
		7.80074	RMSE = 7.8 cm

## Sheet: Ganges-TSA
Date	Year	Month	TWS_anom	TWS_Season	TWS-Residuals	TWS	Aqf_Storage	Aqf_Storage_Season	Aqf_Storage_Res	glVolume	glVolume_Season	glVolume_Residuals	grdWater	grdWater_season	grdWater_Residuals	irrRffStorage	irrRffStorage_Season	irrRffStorage_Residuals	resStorage	resStorage_Seasonal	resStorage_Residuals	ricePaddyStrg	ricePaddyStrg_Seasonal	ricePaddyStrg_Residuals	snowPack	snowPack_Season	snowPack_Residuals	soilMoist	soilMoist_Season	soilMoist_Residuals	surfRffStorage	surfRffStorage_Season	surfRffStorage_Residuals	UGW	smResStrg	endoStrg
1990-01-15	1990	1
1990-02-15	1990	2
1990-03-15	1990	3
1990-04-15	1990	4
1990-05-15	1990	5
1990-06-15	1990	6
1990-07-15	1990	7	18.1482	6.61558	6.3347		11.9031	-0.770643	1.2566	4.31298	0.00546613	-0.038909	0.648238	1.9146	1.18315	-0.216732	-0.247477	-0.188278	1.19482	2.7848	2.61007	-0.0176831	0.128911	-0.0179295	0.039904	-0.525196	-0.0820272	0.13541	2.14844	0.577489	0.148123	1.1767	1.03449
1990-08-15	1990	8	18.4632	14.8583	4.12975		12.1039	1.79107	1.21441	4.28078	-0.252264	-0.0174415	0.665959	3.26179	1.12984	-0.23275	-0.677755	0.155704	1.24157	6.3223	1.26835	-0.0175339	-0.00738964	0.00747091	0.0814669	-0.607975	-0.0744227	0.191734	3.87476	0.121753	0.148146	1.15377	0.324153
1990-09-15	1990	9	18.6105	13.4159	2.57895		12.2867	2.88216	0.575742	4.24607	-0.261173	-0.0373715	0.668709	3.25406	0.519514	-0.214391	-0.420887	-0.075342	1.22594	5.26841	0.704479	-0.017395	0.114929	-0.00872333	0.101495	-0.6066	-0.0964415	0.166041	2.80075	1.0859	0.147345	0.384256	-0.0888077
1990-10-15	1990	10	18.7322	4.82113	1.71186		12.463	2.54356	0.535415	4.20983	-0.204327	-0.0399708	0.665115	1.14868	0.467233	-0.206678	-0.0901077	-0.173345	1.20823	1.55662	0.412447	-0.017256	0.114848	-0.00878084	0.110263	-0.537809	-0.117577	0.153415	0.547555	0.836734	0.146324	-0.257874	-0.200264
1990-11-15	1990	11	18.8622	0.0124608	-0.886406		12.6258	1.82116	0.0790703	4.17596	-0.161024	-0.0334141	0.660977	0.268269	-0.0295375	-0.205434	0.063054	0.16379	1.21162	0.418968	-0.610011	-0.0172532	-0.0330668	-0.00210899	0.108913	-0.400604	-0.125602	0.155247	-1.5966	-0.172927	0.146408	-0.367706	-0.155653
1990-12-15	1990	12	18.8421	-2.5278	-1.22431	TWS	12.7523	0.856806	-0.0845075	4.14249	-0.11034	0.00966127	0.635945	-0.879766	-0.218155	-0.186882	0.190087	0.111476	1.13698	-0.17494	-0.370141	-0.017057	-0.131551	0.017391	0.130027	-0.27995	-0.119788	0.106758	-1.63038	-0.421225	0.141555	-0.367764	-0.149013
1991-01-15	1991	1	18.7864	-4.23381	-0.979364	-5.20488	12.8438	-0.229635	0.0525106	4.11614	-0.042418	-0.0131386	0.585483	-1.48578	-0.371971	-0.181169	0.21654	0.00882145	1.07142	-1.0937	-0.444417	-0.0168413	0.0578767	0.000373241	0.167973	0.016851	0.14061	0.0798551	-1.30878	-0.221565	0.119689	-0.364755	-0.130652
1991-02-15	1991	2	17.6049	-5.25462	-0.959027	-8.58059	12.6637	-0.54887	0.0325732	4.09117	0.0421368	-0.0153497	0.335373	-1.6771	-0.249367	-0.122159	-0.00549734	0.138212	0.555949	-1.93224	-0.309365	-0.0164476	0.0578734	1.20558e-05	0.182361	0.437659	-0.0385726	-0.0578441	-1.26975	-0.532208	-0.027158	-0.358851	0.0149333
1991-03-15	1991	3	16.8402	-6.43354	0.486494	-9.65713	12.4552	-1.0008	0.300402	4.06688	0.122301	-0.00440384	0.115896	-1.80114	-0.0711947	-0.114664	0.0525351	-0.075317	0.301085	-3.04558	0.37206	-0.0162665	0.0578392	-0.000134848	0.183377	0.784797	0.111593	-0.0789706	-1.2447	-0.205505	-0.0723816	-0.358798	0.059082
1991-04-15	1991	4	16.4585	-7.90418	0.917076	-8.14605	12.335	-1.95896	0.548697	4.04505	0.192323	0.0118162	0.0489527	-1.75865	-0.051897	-0.101314	0.225936	-0.1382	0.230252	-3.72349	0.296325	-0.0159171	-0.217119	0.0172626	0.183617	0.946051	0.257349	-0.202087	-1.24914	-0.0806751	-0.0650321	-0.361135	0.0564643
1991-05-15	1991	5	15.8048	-8.44726	0.602012	-4.45224	12.1569	-2.94233	0.730722	4.02264	0.261873	0.00559232	-0.07851	-1.65481	-0.0189324	-0.0592425	0.487845	-0.128258	0.0557766	-4.06251	-0.231021	-0.0155677	-0.0842509	-0.00373843	0.18154	0.730885	0.315701	-0.390164	-0.853385	-0.110618	-0.068556	-0.330594	0.0424706
1991-06-15	1991	6	15.4284	-5.68386	0.904816	0.434539	11.9999	-2.89435	0.745731	4.00011	0.248317	0.0156547	-0.164741	-0.612639	-0.0278086	-0.0625725	0.223625	-0.0872029	-0.00631519	-2.41646	-0.171213	-0.015347	-0.0579587	-0.00356526	0.182245	0.0120794	0.221485	-0.436374	-0.201664	0.240973	-0.0685212	0.0151638	-0.0292907
1991-07-15	1991	7	15.1482	6.61558	-4.84248	5.20488	11.8385	-0.770643	-0.840075	3.97572	0.00546613	-0.00130302	-0.214558	1.9146	-0.955372	-0.0580085	-0.247477	0.361124	-0.0569483	2.7848	-2.32387	-0.0153388	0.128911	-0.0155497	0.183674	-0.525196	-0.0531389	-0.436261	2.14844	-0.50323	-0.0685577	1.1767	-0.510992
1991-08-15	1991	8	14.8601	14.8583	-1.44425	8.58059	11.6761	1.79107	-0.859549	3.95117	-0.252264	0.0207223	-0.239456	3.26179	-0.598474	-0.0541635	-0.677755	0.0670553	-0.10695	6.3223	-0.441503	-0.0151473	-0.00738964	0.0072578	0.168668	-0.607975	-0.149437	-0.451664	3.87476	0.511633	-0.0683934	1.15377	-0.00199049
1991-09-15	1991	9	14.7014	13.4159	1.9081	9.65713	11.528	2.88216	-0.108198	3.92542	-0.261173	0.0212703	-0.247527	3.25406	0.632434	-0.0667225	-0.420887	-0.0628073	-0.109677	5.26841	1.1901	-0.0149519	0.114929	-0.00697345	0.184319	-0.6066	-0.176386	-0.428876	2.80075	0.203427	-0.0685244	0.384256	0.215255
1991-10-15	1991	10	14.4166	4.82113	-1.81744	8.14605	11.3651	2.54356	-0.50438	3.90039	-0.204327	0.000550469	-0.255217	1.14868	-0.141987	-0.0525291	-0.0901077	0.177358	-0.182711	1.55662	-0.290308	-0.0147564	0.114848	-0.00708749	0.17838	-0.537809	-0.210613	-0.453513	0.547555	-0.813263	-0.0684412	-0.257874	-0.0277848
1991-11-15	1991	11	14.0812	0.0124608	-0.622391	4.45224	11.1979	1.82116	-0.376761	3.8726	-0.161024	-0.000370911	-0.261975	0.268269	-0.141355	-0.0403551	0.063054	-0.0412491	-0.270373	0.418968	0.126882	-0.0147537	-0.0330668	-0.00196065	0.156408	-0.400604	-0.16464	-0.489338	-1.5966	-0.0828649	-0.0688487	-0.367706	0.0600209
1991-12-15	1991	12	13.8551	-2.5278	0.400315	-0.434539	11.035	0.856806	-0.304499	3.84567	-0.11034	0.0137951	-0.26411	-0.879766	0.0840879	-0.0391407	0.190087	0.0185016	-0.292545	-0.17494	0.451792	-0.0145529	-0.131551	0.014985	0.142529	-0.27995	-0.115147	-0.488901	-1.63038	0.17579	-0.0688982	-0.367764	0.0610026
1992-01-15	1992	1	13.4316	-4.23381	0.919039		10.8423	-0.229635	0.105774	3.82189	-0.042418	-0.0135693	-0.308652	-1.48578	0.223393	-0.0257312	0.21654	-0.100476	-0.412568	-1.0937	0.43955	-0.014338	0.0578767	0.000167832	0.153737	0.016851	-0.0252241	-0.541103	-1.30878	0.214559	-0.0839392	-0.364755	0.0749469
1992-02-15	1992	2	12.9668	-5.25462	1.77447		10.5303	-0.54887	0.388612	3.81105	0.0421368	-0.0442273	-0.365631	-1.6771	0.354783	-0.00433783	-0.00549734	-0.130317	-0.500516	-1.93224	0.714378	-0.0139533	0.0578734	-0.00013694	0.159679	0.437659	0.171921	-0.536402	-1.26975	0.21981	-0.113421	-0.358851	0.0996246
1992-03-15	1992	3	12.2836	-6.43354	1.62583		10.1892	-1.0008	0.611376	3.79944	0.122301	-0.0373215	-0.459142	-1.80114	0.411568	-0.00328685	0.0525351	-0.0163723	-0.684043	-3.04558	0.480788	-0.0137759	0.0578392	-0.000280069	0.160365	0.784797	0.0633405	-0.535031	-1.2447	-0.0450897	-0.170125	-0.358798	0.157823
1992-04-15	1992	4	11.5715	-7.90418	1.77934		9.8142	-1.95896	1.06341	3.78746	0.192323	-0.0639793	-0.594513	-1.75865	0.510469	0.0113551	0.225936	-0.104781	-0.872491	-3.72349	0.347119	-0.0134347	-0.217119	0.0148134	0.16049	0.946051	0.0168171	-0.518698	-1.24914	-0.193973	-0.202875	-0.361135	0.189418
1992-05-15	1992	5	11.213	-8.44726	2.47977		9.46223	-2.94233	1.47126	3.77729	0.261873	-0.0722364	-0.630131	-1.65481	0.507065	0.0164954	0.487845	-0.189423	-0.928057	-4.06251	0.486743	-0.0130935	-0.0842509	-0.00380296	0.163066	0.730885	0.167627	-0.433841	-0.853385	-0.0616914	-0.200936	-0.330594	0.174256
1992-06-15	1992	6	10.8611	-5.68386	0.390297		9.12987	-2.89435	1.303	3.76749	0.248317	-0.037085	-0.63005	-0.612639	-0.0969921	0.0141789	0.223625	-0.00303911	-0.96345	-2.41646	-0.654354	-0.0128747	-0.0579587	-0.00345852	0.162078	0.0120794	0.376139	-0.405161	-0.201664	-0.416664	-0.200953	0.0151638	-0.0773507
1992-07-15	1992	7	10.4627	6.61558	-5.73466		8.81007	-0.770643	-1.55559	3.75542	0.00546613	0.0889139	-0.626091	1.9146	-1.2276	0.0139985	-0.247477	0.545837	-1.0324	2.7848	-2.40379	-0.0128763	0.128911	-0.0133962	0.161444	-0.525196	0.0404036	-0.405881	2.14844	-0.477196	-0.20102	1.1767	-0.732306
1992-08-15	1992	8	10.0829	14.8583	-4.86561		8.48396	1.79107	-1.76116	3.74745	-0.252264	0.0851564	-0.626096	3.26179	-1.33397	0.0203154	-0.677755	0.00518809	-1.09719	6.3223	-1.65358	-0.0126884	-0.00738964	0.00692704	0.170112	-0.607975	-0.142657	-0.402015	3.87476	0.478434	-0.200976	1.15377	-0.549857
1992-09-15	1992	9	9.61086	13.4159	-1.5464		8.15659	2.88216	-1.23655	3.74091	-0.261173	0.0619159	-0.631591	3.25406	-0.607949	0.0376527	-0.420887	0.00852146	-1.20343	5.26841	0.0224619	-0.0124921	0.114929	-0.00533855	0.145152	-0.6066	-0.135711	-0.421014	2.80075	0.391564	-0.200906	0.384256	-0.045363
1992-10-15	1992	10	9.29034	4.82113	-0.992859		7.85068	2.54356	-1.21363	3.7354	-0.204327	0.0435049	-0.628797	1.14868	-0.195822	0.0236033	-0.0901077	0.162909	-1.23256	1.55662	0.0927617	-0.0122957	0.114848	-0.00545351	0.146209	-0.537809	-0.147537	-0.391486	0.547555	0.142989	-0.20039	-0.257874	0.127428
1992-11-15	1992	11	9.08509	0.0124608	0.151203		7.57036	1.82116	-0.737519	3.72925	-0.161024	0.0253904	-0.620826	0.268269	0.218468	0.00585484	0.063054	-0.115258	-1.21926	0.418968	0.651058	-0.012293	-0.0330668	-0.00179542	0.173451	-0.400604	-0.193539	-0.341391	-1.5966	0.113348	-0.200045	-0.367706	0.191015
1992-12-15	1992	12	8.8396	-2.5278	0.634135	Aquifers	7.29099	0.856806	-0.398086	3.72189	-0.11034	-0.00721748	-0.602483	-0.879766	0.469973	0.00170652	0.190087	-0.0245101	-1.21259	-0.17494	0.544443	-0.0120856	-0.131551	0.0124979	0.160236	-0.27995	-0.140456	-0.310658	-1.63038	-0.0110943	-0.197385	-0.367764	0.188678
1993-01-15	1993	1	8.75571	-4.23381	1.03744	0.367239	7.05156	-0.229635	-0.016805	3.71031	-0.042418	0.00231411	-0.543228	-1.48578	0.457906	-0.0137911	0.21654	-0.0366128	-1.12153	-1.0937	0.371014	-0.0118709	0.0578767	-4.46744e-05	0.114496	0.016851	0.118024	-0.249074	-1.30878	-0.0310744	-0.181143	-0.364755	0.172683
1993-02-15	1993	2	9.07821	-5.25462	-0.000945257	-0.934972	7.06937	-0.54887	-0.0788974	3.68541	0.0421368	0.00298661	-0.444071	-1.6771	0.367284	-0.0709216	-0.00549734	0.144313	-0.908418	-1.93224	-0.152546	-0.0114827	0.0578734	-0.000251129	0.0954256	0.437659	-0.0633436	-0.187317	-1.26975	-0.357265	-0.149773	-0.358851	0.136813
1993-03-15	1993	3	8.92061	-6.43354	1.14256	-1.98666	7.02074	-1.0008	0.108914	3.65585	0.122301	0.0401909	-0.420316	-1.80114	0.406261	-0.0553653	0.0525351	-0.132886	-0.96075	-3.04558	0.407833	-0.011313	0.0578392	-0.000386627	0.0939487	0.784797	0.142443	-0.254771	-1.2447	0.0289871	-0.147396	-0.358798	0.141296
1993-04-15	1993	4	9.22189	-7.90418	1.66584	-2.50602	7.00898	-1.95896	0.504854	3.63129	0.192323	0.0183031	-0.312581	-1.75865	0.324194	-0.0817835	0.225936	-0.224624	-0.854619	-3.72349	0.488882	-0.0109852	-0.217119	0.0123967	0.0946528	0.946051	0.409566	-0.178736	-1.24914	0.0672019	-0.0743161	-0.361135	0.0649938
1993-05-15	1993	5	9.44876	-8.44726	1.29821	-2.3539	7.05655	-2.94233	0.524402	3.60525	0.261873	0.0115153	-0.225935	-1.65481	0.322992	-0.10824	0.487845	-0.114468	-0.753663	-4.06251	0.392379	-0.0106574	-0.0842509	-0.00375095	0.0927969	0.730885	0.0793102	-0.135835	-0.853385	0.00910673	-0.0714868	-0.330594	0.0767285
1993-06-15	1993	6	9.5428	-5.68386	0.701929	-1.57105	7.08916	-2.89435	0.470666	3.5788	0.248317	0.0126259	-0.17466	-0.612639	0.158674	-0.0987858	0.223625	-0.0760455	-0.734779	-2.41646	0.209718	-0.0104393	-0.0579587	-0.00331661	0.0904823	0.0120794	-0.10114	-0.125554	-0.201664	0.0427294	-0.0713945	0.0151638	-0.0120123
1993-07-15	1993	7	9.58817	6.61558	-0.990267	-0.367239	7.12021	-0.770643	0.347893	3.55266	0.00546613	-0.00705655	-0.152693	1.9146	-0.511111	-0.0988127	-0.247477	-0.0269181	-0.706917	2.7848	-0.171922	-0.0104182	0.128911	-0.0111967	0.0806514	-0.525196	-0.107654	-0.125147	2.14844	-0.0168427	-0.0713541	1.1767	-0.485528
1993-08-15	1993	8	9.64532	14.8583	-6.31919	0.934972	7.14686	1.79107	-1.00756	3.52625	-0.252264	-0.048481	-0.139964	3.26179	-1.53504	-0.103022	-0.677755	0.315201	-0.662667	6.3223	-2.71608	-0.0102211	-0.00738964	0.0064963	0.0632762	-0.607975	-0.0535444	-0.10378	3.87476	-0.629251	-0.0713887	1.15377	-0.650921
1993-09-15	1993	9	9.78819	13.4159	1.89157	1.98666	7.18403	2.88216	-0.405114	3.50062	-0.261173	0.00758442	-0.128185	3.25406	0.181472	-0.127326	-0.420887	-0.143518	-0.580283	5.26841	0.672886	-0.0100259	0.114929	-0.00387137	0.0771532	-0.6066	-0.0592632	-0.0563772	2.80075	0.939353	-0.0714	0.384256	0.702091
1993-10-15	1993	10	9.76266	4.82113	1.25728	2.50602	7.20533	2.54356	0.00251697	3.47001	-0.204327	-0.00356463	-0.129184	1.14868	0.344314	-0.112305	-0.0901077	-0.0186616	-0.590442	1.55662	0.662121	-0.00983056	0.114848	-0.00398525	0.0632825	-0.537809	-0.0868819	-0.062187	0.547555	0.3285	-0.0720148	-0.257874	0.0330053
1993-11-15	1993	11	9.67858	0.0124608	0.686253	2.3539	7.20649	1.82116	0.0177096	3.44349	-0.161024	-0.00632375	-0.133478	0.268269	0.346412	-0.0955277	0.063054	0.0995765	-0.620215	0.418968	0.27861	-0.00982784	-0.0330668	-0.00164242	0.0326123	-0.400604	-0.0804746	-0.0729181	-1.5966	-0.0317551	-0.0720412	-0.367706	0.064119
1993-12-15	1993	12	9.58104	-2.5278	0.43704	1.57105	7.20458	0.856806	0.0608782	3.41731	-0.11034	-0.0162799	-0.151936	-0.879766	0.283032	-0.0852257	0.190087	0.062099	-0.665772	-0.17494	0.331974	-0.00963438	-0.131551	0.0102992	0.0370043	-0.27995	-0.135195	-0.0908844	-1.63038	-0.225981	-0.0744101	-0.367764	0.0661877
1994-01-15	1994	1	9.60386	-4.23381	0.875214		7.19937	-0.229635	0.155212	3.38701	-0.042418	0.00873011	-0.14908	-1.48578	0.216507	-0.0718214	0.21654	-0.0290949	-0.653328	-1.0937	0.433804	-0.00941947	0.0578767	-0.000131085	0.0420422	0.016851	-0.0180236	-0.0820197	-1.30878	0.058277	-0.0589048	-0.364755	0.0500291
1994-02-15	1994	2	9.93871	-5.25462	0.852975		7.2484	-0.54887	0.188111	3.35062	0.0421368	0.0301746	-0.0881667	-1.6771	0.152731	-0.0753574	-0.00549734	-0.1429	-0.464977	-1.93224	0.392623	-0.0090367	0.0578734	-0.000353675	0.0420464	0.437659	0.156559	-0.0324562	-1.26975	0.0567029	-0.0323593	-0.358851	0.0192642
1994-03-15	1994	3	11.042	-6.43354	-1.28524		7.46156	-1.0008	-0.0762867	3.31233	0.122301	0.0163335	0.112784	-1.80114	-0.138829	-0.104412	0.0525351	0.0964184	0.0868568	-3.04558	-0.761683	-0.00886734	0.0578392	-0.000488818	0.0419552	0.784797	0.0279883	0.0891777	-1.2447	-0.384678	0.0506232	-0.358798	-0.0641006
1994-04-15	1994	4	11.0957	-7.90418	-1.21693		7.58845	-1.95896	-0.060698	3.26375	0.192323	0.0676007	0.115884	-1.75865	-0.155794	-0.0842701	0.225936	-0.0208138	0.182224	-3.72349	-0.905239	-0.00854427	-0.217119	0.00998842	0.0409558	0.946051	0.0952198	0.0219765	-1.24914	-0.262284	-0.0246976	-0.361135	0.0150584
1994-05-15	1994	5	10.9574	-8.44726	-1.38096		7.64932	-2.94233	-0.0913202	3.21526	0.261873	0.0874154	0.0788859	-1.65481	-0.203326	-0.0671119	0.487845	-0.0319711	0.138361	-4.06251	-1.04633	-0.0082212	-0.0842509	-0.0038657	0.0406139	0.730885	0.184197	-0.0597257	-0.853385	-0.282598	-0.0299805	-0.330594	0.00679514
1994-06-15	1994	6	10.988	-5.68386	-0.469474		7.70076	-2.89435	-0.203427	3.16672	0.248317	0.061077	0.056195	-0.612639	-0.0379056	-0.0538912	0.223625	0.0399113	0.203985	-2.41646	-0.57971	-0.00800309	-0.0579587	-0.00317388	0.0404081	0.0120794	0.00938965	-0.0881156	-0.201664	0.111668	-0.0300457	0.0151638	0.132703
1994-07-15	1994	7	11.0372	6.61558	1.57899		7.73795	-0.770643	0.318535	3.11859	0.00546613	-0.00964577	0.0435861	1.9146	0.023563	-0.0451664	-0.247477	-0.122997	0.266761	2.7848	1.1146	-0.00800106	0.128911	-0.00902056	0.0456717	-0.525196	-0.0726235	-0.0921641	2.14844	0.544936	-0.030042	1.1767	-0.208294
1994-08-15	1994	8	11.1289	14.8583	5.43674		7.77267	1.79107	0.924489	3.07027	-0.252264	-0.0519597	0.0411368	3.26179	0.69527	-0.0452375	-0.677755	-0.0912435	0.334779	6.3223	2.90848	-0.00781066	-0.00738964	0.00611813	0.0640465	-0.607975	-0.0554092	-0.0712848	3.87476	0.797861	-0.0296622	1.15377	0.303142
1994-09-15	1994	9	11.1538	13.4159	1.17059		7.79705	2.88216	0.504575	3.02184	-0.261173	-0.0966519	0.0369909	3.25406	0.0534875	-0.0345	-0.420887	0.00536341	0.378518	5.26841	0.85849	-0.00761753	0.114929	-0.00240285	0.0713484	-0.6066	-0.065451	-0.0801904	2.80075	0.156752	-0.0296766	0.384256	-0.243482
1994-10-15	1994	10	11.2603	4.82113	-1.90005		7.82681	2.54356	0.111505	2.97676	-0.204327	-0.0921616	0.0370852	1.14868	-0.265931	-0.0443157	-0.0901077	0.119248	0.464408	1.55662	-0.919087	-0.0074244	0.114848	-0.00251458	0.0958604	-0.537809	-0.123564	-0.059561	0.547555	-0.654554	-0.0292843	-0.257874	-0.0731207
1994-11-15	1994	11	11.3605	0.0124608	-0.628533		7.8625	1.82116	-0.0211087	2.9289	-0.161024	-0.0742314	0.038091	0.268269	-0.0974466	-0.0453527	0.063054	0.20805	0.548847	0.418968	-0.102957	-0.00742168	-0.0330668	-0.00143131	0.11647	-0.400604	-0.166801	-0.0521616	-1.5966	-0.393191	-0.0293599	-0.367706	0.0206554
1994-12-15	1994	12	11.3946	-2.5278	-0.786623	Glaciers	7.86872	0.856806	-0.156977	2.88011	-0.11034	-0.056669	0.041869	-0.879766	-0.0620796	-0.0367537	0.190087	0.118324	0.620433	-0.17494	-0.200917	-0.00722367	-0.131551	0.0079128	0.107809	-0.27995	-0.142836	-0.0524425	-1.63038	-0.313003	-0.0278606	-0.367764	0.0196831
1995-01-15	1995	1	11.2683	-4.23381	0.311823	-0.0205406	7.83951	-0.229635	-0.0681763	2.82914	-0.042418	-0.0131742	0.0302762	-1.48578	0.0077595	-0.0225949	0.21654	-0.0791746	0.628404	-1.0937	-0.0317194	-0.00700893	0.0578767	-0.00025684	0.0848921	0.016851	0.159624	-0.0821535	-1.30878	0.308962	-0.0321802	-0.364755	0.0278623
1995-02-15	1995	2	10.7573	-5.25462	0.332426	0.100671	7.7069	-0.54887	0.0220955	2.78478	0.0421368	0.0148033	-0.0234946	-1.6771	0.0383082	0.00320863	-0.00549734	-0.0926153	0.406005	-1.93224	0.0465153	-0.00663266	0.0578734	-0.000440111	0.0829655	0.437659	0.203262	-0.153352	-1.26975	0.0707308	-0.0430678	-0.358851	0.0297994
1995-03-15	1995	3	10.1685	-6.43354	0.867222	0.194908	7.52872	-1.0008	0.213732	2.75028	0.122301	0.037444	-0.113645	-1.80114	0.0887316	0.00688407	0.0525351	-0.132666	0.160687	-3.04558	0.195156	-0.00646999	0.0578392	-0.000568566	0.0828674	0.784797	0.281221	-0.167028	-1.2447	0.11908	-0.0738184	-0.358798	0.0650488
1995-04-15	1995	4	10.1926	-7.90418	0.888077	0.236919	7.44713	-1.95896	0.508841	2.72131	0.192323	0.0357372	-0.0735851	-1.75865	0.0457441	-0.00155936	0.225936	-0.115968	0.19797	-3.72349	0.0922826	-0.00615807	-0.217119	0.00763479	0.0828748	0.946051	0.30061	-0.150445	-1.24914	-0.00106959	-0.0248825	-0.361135	0.0143357
1995-05-15	1995	5	10.1115	-8.44726	-0.125305	0.215448	7.38848	-2.94233	0.244231	2.69288	0.261873	0.0242977	-0.0673153	-1.65481	-0.0117895	0.0012864	0.487845	0.00281781	0.19183	-4.06251	-0.240761	-0.00584614	-0.0842509	-0.00386455	0.0828671	0.730885	0.0380134	-0.154427	-0.853385	-0.191267	-0.0182002	-0.330594	0.0130065
1995-06-15	1995	6	10.0388	-5.68386	-1.03682	0.136248	7.3343	-2.89435	-0.187557	2.66658	0.248317	-0.0503713	-0.0676258	-0.612639	-0.0531978	-0.0117774	0.223625	0.167703	0.159315	-2.41646	-0.439385	-0.00562811	-0.0579587	-0.00297202	0.0965075	0.0120794	-0.321709	-0.115568	-0.201664	-0.217412	-0.0173164	0.0151638	0.0681391
1995-07-15	1995	7	9.95295	6.61558	-3.46835	0.0205406	7.28769	-0.770643	-0.822517	2.64081	0.00546613	-0.0642325	-0.0722062	1.9146	-0.505895	-0.0240536	-0.247477	0.165533	0.113535	2.7848	-1.40096	-0.00560537	0.128911	-0.00690105	0.115456	-0.525196	-0.165527	-0.0855415	2.14844	-0.316065	-0.0171425	1.1767	-0.351845
1995-08-15	1995	8	9.87912	14.8583	-0.379575	-0.100671	7.26033	1.79107	-0.701346	2.6152	-0.252264	-0.0109184	-0.0747646	3.26179	-0.270628	-0.034759	-0.677755	-0.0576167	0.0761229	6.3223	0.223326	-0.0054026	-0.00738964	0.00566212	0.129746	-0.607975	-0.122286	-0.0704237	3.87476	0.632888	-0.0169297	1.15377	-0.0785974
1995-09-15	1995	9	9.84395	13.4159	2.77065	-0.194908	7.24069	2.88216	0.0819266	2.59004	-0.261173	-0.0124993	-0.0717259	3.25406	0.642917	-0.0460809	-0.420887	-0.0843769	0.0367336	5.26841	1.64767	-0.0052094	0.114929	-0.00106791	0.157336	-0.6066	-0.151349	-0.041402	2.80075	0.316953	-0.0164445	0.384256	0.330517
1995-10-15	1995	10	9.82976	4.82113	-1.44267	-0.236919	7.22318	2.54356	0.0112857	2.56533	-0.204327	-0.0218393	-0.0652439	1.14868	-0.0883636	-0.0437638	-0.0901077	0.152845	0.00486555	1.55662	-0.533226	-0.0050162	0.114848	-0.0011797	0.190033	-0.537809	-0.217829	-0.0230288	0.547555	-0.738868	-0.0165993	-0.257874	-0.0056182
1995-11-15	1995	11	9.74878	0.0124608	0.110095	-0.215448	7.1846	1.82116	0.00664193	2.54123	-0.161024	-0.00215523	-0.0632754	0.268269	0.000193063	-0.0359384	0.063054	0.0418705	-0.050756	0.418968	0.106467	-0.00501348	-0.0330668	-0.00122308	0.221736	-0.400604	-0.108384	-0.0273059	-1.5966	0.0482581	-0.0165115	-0.367706	0.0184123
1995-12-15	1995	12	9.71283	-2.5278	-0.13485	-0.136248	7.16515	0.856806	-0.0127302	2.51834	-0.11034	-0.00419593	-0.0630248	-0.879766	-0.0121505	-0.0386876	0.190087	-0.027057	-0.0888019	-0.17494	-0.0410463	-0.00481841	-0.131551	0.00578038	0.266518	-0.27995	-0.0741624	-0.0243078	-1.63038	0.0191854	-0.017542	-0.367764	0.0114516
1996-01-15	1996	1	9.79909	-4.23381	0.895		7.1763	-0.229635	0.266663	2.50563	-0.042418	0.00305925	-0.0533597	-1.48578	0.0606954	-0.0538111	0.21654	-0.176423	-0.0970261	-1.0937	0.244768	-0.00460344	0.0578767	-0.000229058	0.333727	0.016851	0.0822674	-0.0014922	-1.30878	0.409714	-0.00629404	-0.364755	0.00452965
1996-02-15	1996	2	10.2231	-5.25462	0.44457		7.30152	-0.54887	0.191875	2.49744	0.0421368	0.000199653	0.0130921	-1.6771	0.0381858	-0.0855117	-0.00549734	-0.139757	0.0476096	-1.93224	-0.067761	-0.00422594	0.0578734	-0.000528416	0.344311	0.437659	0.272995	0.0485073	-1.26975	0.217132	0.0603323	-0.358851	-0.0677787
1996-03-15	1996	3	10.7844	-6.43354	0.0810072		7.50518	-1.0008	0.0270662	2.48682	0.122301	0.00442592	0.149709	-1.80114	-0.0968378	-0.090728	0.0525351	-0.00724914	0.199683	-3.04558	-0.226257	-0.00406221	0.0578392	-0.000657922	0.344676	0.784797	0.411776	0.057699	-1.2447	0.114831	0.135388	-0.358798	-0.146015
1996-04-15	1996	4	11.0739	-7.90418	-0.964887		7.68741	-1.95896	-0.194324	2.47687	0.192323	-0.0090178	0.225953	-1.75865	-0.230173	-0.0976652	0.225936	0.0740421	0.250479	-3.72349	-0.627685	-0.00375405	-0.217119	0.00526334	0.344687	0.946051	0.41924	0.0781001	-1.24914	-0.280941	0.111742	-0.361135	-0.121236
1996-05-15	1996	5	11.4872	-8.44726	-1.93227		7.85721	-2.94233	-0.457897	2.46939	0.261873	-0.0268876	0.287817	-1.65481	-0.363915	-0.122788	0.487845	0.0939016	0.366414	-4.06251	-0.871896	-0.00344589	-0.0842509	-0.00392392	0.352583	0.730885	0.305678	0.16694	-0.853385	-0.476657	0.113074	-0.330594	-0.130633
1996-06-15	1996	6	11.6903	-5.68386	-1.65327		8.02162	-2.89435	-0.741085	2.45949	0.248317	0.00418171	0.318314	-0.612639	-0.323155	-0.130915	0.223625	0.105359	0.398031	-2.41646	-0.776792	-0.00322792	-0.0579587	-0.00279259	0.353699	0.0120794	0.227606	0.160683	-0.201664	-0.219876	0.112571	0.0151638	0.073228
1996-07-15	1996	7	11.8753	6.61558	-0.302592		8.17736	-0.770643	-0.2095	2.44817	0.00546613	0.0300811	0.33635	1.9146	-0.117031	-0.128824	-0.247477	-0.110104	0.442757	2.7848	0.0054458	-0.00322002	0.128911	-0.00475636	0.344354	-0.525196	-0.26741	0.14579	2.14844	0.052597	0.112527	1.1767	0.318001
1996-08-15	1996	8	11.9326	14.8583	4.30248		8.30148	1.79107	0.701344	2.43675	-0.252264	0.0401232	0.337322	3.26179	0.95669	-0.109175	-0.677755	-0.0457973	0.456869	6.3223	1.66746	-0.00303187	-0.00738964	0.00525606	0.311879	-0.607975	-0.300044	0.0885695	3.87476	0.584196	0.111899	1.15377	0.693248
1996-09-15	1996	9	11.9561	13.4159	4.13206		8.40526	2.88216	1.10412	2.42253	-0.261173	0.0355512	0.331186	3.25406	1.15494	-0.0904655	-0.420887	-0.123239	0.477334	5.26841	1.81662	-0.0028383	0.114929	0.00025895	0.264562	-0.6066	-0.258445	0.0370698	2.80075	0.483294	0.111416	0.384256	-0.0810981
1996-10-15	1996	10	11.903	4.82113	1.44443		8.49688	2.54356	0.775181	2.40651	-0.204327	0.0472281	0.322894	1.14868	0.265859	-0.078986	-0.0901077	-0.113408	0.466688	1.55662	0.396174	-0.00264472	0.114848	0.000146787	0.193515	-0.537809	-0.12656	-0.0131761	0.547555	0.317358	0.111265	-0.257874	-0.117507
1996-11-15	1996	11	11.996	0.0124608	0.299673		8.60552	1.82116	0.558624	2.39035	-0.161024	0.0299909	0.322535	0.268269	-0.0196496	-0.0965893	0.063054	0.00500143	0.525225	0.418968	-0.0901105	-0.002642	-0.0330668	-0.000978944	0.135459	-0.400604	-0.0087173	0.00466031	-1.5966	-0.0587976	0.111471	-0.367706	-0.115604
1996-12-15	1996	12	12.1296	-2.5278	-0.331619	Ground Water	8.73455	0.856806	0.286769	2.3745	-0.11034	0.00379968	0.326283	-0.879766	-0.185021	-0.10885	0.190087	0.068197	0.577868	-0.17494	-0.171013	-0.00243466	-0.131551	0.00349144	0.0977157	-0.27995	-0.0174932	0.0191974	-1.63038	-0.203025	0.11071	-0.367764	-0.117324
1997-01-15	1997	1	12.1594	-4.23381	-0.777524	-1.57916	8.86661	-0.229635	0.0658569	2.35966	-0.042418	0.0119707	0.308832	-1.48578	-0.289836	-0.120076	0.21654	0.125631	0.566964	-1.0937	-0.24987	-0.00221979	0.0578767	-0.000354939	0.077876	0.016851	-0.0515822	0.00890085	-1.30878	-0.287329	0.0927887	-0.364755	-0.102087
1997-02-15	1997	2	12.3409	-5.25462	-1.39135	-2.30814	9.00229	-0.54887	-0.263529	2.33943	0.0421368	-0.0124435	0.336284	-1.6771	-0.358638	-0.124142	-0.00549734	0.123385	0.596561	-1.93224	-0.371134	-0.0018412	0.0578734	-0.000590242	0.0728869	0.437659	-0.0233863	0.0234561	-1.26975	-0.375814	0.0959152	-0.358851	-0.109164
1997-03-15	1997	3	12.0487	-6.43354	-1.82063	-2.41866	9.03873	-1.0008	-0.407118	2.31998	0.122301	-0.0209892	0.257581	-1.80114	-0.304218	-0.119686	0.0525351	0.159463	0.477288	-3.04558	-0.631614	-0.00167659	0.0578392	-0.000720637	0.0726364	0.784797	-0.168752	-0.0142266	-1.2447	-0.416193	0.0180465	-0.358798	-0.0304829
1997-04-15	1997	4	11.7359	-7.90418	-0.510192	-1.8811	9.01539	-1.95896	-0.218596	2.30127	0.192323	-0.0272753	0.146732	-1.75865	-0.155255	-0.118143	0.225936	-0.11672	0.334466	-3.72349	-0.009227	-0.00137108	-0.217119	0.00291301	0.0728314	0.946051	-0.00556546	-0.00853896	-1.24914	0.0197345	-0.00672191	-0.361135	-0.000294481
1997-05-15	1997	5	11.4712	-8.44726	-0.313537	-0.839497	8.98107	-2.94233	-0.0334182	2.28118	0.261873	-0.0288608	0.0668793	-1.65481	-0.0980014	-0.106445	0.487845	-0.0695652	0.229587	-4.06251	-0.103348	-0.00106556	-0.0842509	-0.00381623	0.0761245	0.730885	0.129211	-0.0407256	-0.853385	-0.094546	-0.0154321	-0.330594	-0.0112658
1997-06-15	1997	6	11.4709	-5.68386	-1.07652	0.427047	8.95334	-2.89435	-0.0880904	2.2645	0.248317	0.0210907	0.0401652	-0.612639	-0.254415	-0.106463	0.223625	-0.0538129	0.25895	-2.41646	-0.76856	-0.000846809	-0.0579587	-0.0025952	0.0884698	0.0120794	0.254759	-0.0116151	-0.201664	-0.171136	-0.0155949	0.0151638	-0.0136583
1997-07-15	1997	7	11.7207	6.61558	2.02975	1.57916	8.94992	-0.770643	0.646111	2.25274	0.00546613	-0.0173066	0.0544499	1.9146	0.49429	-0.131214	-0.247477	-0.156505	0.332043	2.7848	0.47132	-0.000825713	0.128911	-0.0026076	0.150004	-0.525196	-0.132929	0.128085	2.14844	0.244966	-0.0144734	1.1767	0.482519
1997-08-15	1997	8	11.8799	14.8583	0.849173	2.30814	8.96453	1.79107	0.475555	2.23928	-0.252264	0.00417004	0.0612454	3.26179	0.288326	-0.14363	-0.677755	0.0421369	0.364801	6.3223	0.328251	-0.000625441	-0.00738964	0.00482496	0.213729	-0.607975	-0.2049	0.195	3.87476	0.0255732	-0.0144441	1.15377	-0.114834
1997-09-15	1997	9	12.0056	13.4159	0.329353	2.41866	8.98209	2.88216	0.247271	2.22735	-0.261173	0.00619874	0.0662029	3.25406	0.0897415	-0.143324	-0.420887	-0.0518671	0.391474	5.26841	0.188614	-0.000430778	0.114929	0.00151759	0.265989	-0.6066	-0.257533	0.230672	2.80075	0.357943	-0.0144252	0.384256	-0.252478
1997-10-15	1997	10	12.2448	4.82113	-2.07436	1.8811	9.01574	2.54356	-0.155544	2.21755	-0.204327	-0.00485686	0.0717371	1.14868	-0.441223	-0.170507	-0.0901077	0.118484	0.496545	1.55662	-0.89223	-0.000236114	0.114848	0.00140434	0.344025	-0.537809	-0.237554	0.284059	0.547555	-0.366118	-0.0140703	-0.257874	-0.0966931
1997-11-15	1997	11	12.4525	0.0124608	-0.159818	0.839497	9.05207	1.82116	-0.220694	2.20599	-0.161024	0.0141898	0.0803359	0.268269	-0.0980198	-0.175921	0.063054	0.0841197	0.568448	0.418968	0.219021	-0.000233377	-0.0330668	-0.000762516	0.419238	-0.400604	-0.144352	0.316378	-1.5966	-0.0211886	-0.013851	-0.367706	0.00776401
1997-12-15	1997	12	12.6231	-2.5278	2.17262	-0.427047	9.08249	0.856806	-0.102187	2.19339	-0.11034	0.0438028	0.0996147	-0.879766	0.213063	-0.17881	0.190087	-0.158852	0.633377	-0.17494	0.650601	-3.48552e-05	-0.131551	0.00134479	0.451266	-0.27995	0.367372	0.351265	-1.63038	1.1413	-0.00941522	-0.367764	0.0162577
1998-01-15	1998	1	12.6648	-4.23381	0.626741		9.07549	-0.229635	0.0322673	2.16976	-0.042418	0.0403511	0.117286	-1.48578	-0.0167434	-0.161431	0.21654	0.0179951	0.680152	-1.0937	0.0300357	0.000180019	0.0578767	-0.000351488	0.436032	0.016851	0.35496	0.355743	-1.30878	0.168813	-0.00839156	-0.364755	-0.000555317
1998-02-15	1998	2	12.7953	-5.25462	-0.337287		9.08668	-0.54887	-0.137227	2.14509	0.0421368	0.0387395	0.155225	-1.6771	-0.118089	-0.15735	-0.00549734	0.16026	0.772777	-1.93224	-0.227276	0.000549725	0.0578734	-0.000645208	0.432707	0.437659	0.243914	0.354548	-1.26975	-0.278838	0.00504289	-0.358851	-0.0180646
1998-03-15	1998	3	12.7432	-6.43354	0.355897		9.05112	-1.0008	-0.0156991	2.11314	0.122301	0.068256	0.187243	-1.80114	-0.167471	-0.153577	0.0525351	-0.13284	0.725187	-3.04558	0.381341	0.00070525	0.0578392	-0.000766517	0.432596	0.784797	0.407713	0.344059	-1.2447	-0.133836	0.0426923	-0.358798	-0.0508705
1998-04-15	1998	4	12.4993	-7.90418	1.21783		8.99039	-1.95896	0.242443	2.07742	0.192323	0.057843	0.189489	-1.75865	-0.0948246	-0.146157	0.225936	-0.153676	0.583614	-3.72349	0.604458	0.000999717	-0.217119	0.000575068	0.432361	0.946051	0.537468	0.310948	-1.24914	0.0880683	0.06024	-0.361135	-0.0646237
1998-05-15	1998	5	12.6406	-8.44726	0.565192		8.96793	-2.94233	0.344715	2.0431	0.261873	0.0580492	0.246599	-1.65481	-0.0463756	-0.177881	0.487845	-0.0327951	0.654503	-4.06251	0.250887	0.00129418	-0.0842509	-0.00379372	0.426155	0.730885	0.163511	0.409791	-0.853385	-0.126415	0.0691089	-0.330594	-0.0425779
1998-06-15	1998	6	12.5648	-5.68386	-1.67011		8.94988	-2.89435	-0.168616	2.00588	0.248317	-0.003901	0.280339	-0.612639	-0.282539	-0.187074	0.223625	0.235344	0.607752	-2.41646	-0.556066	0.00151335	-0.0579587	-0.00237687	0.407758	0.0120794	-0.247333	0.429648	-0.201664	-0.558656	0.0690554	0.0151638	-0.0860247
1998-07-15	1998	7	12.1942	6.61558	3.12175		8.91635	-0.770643	0.813958	1.96382	0.00546613	-0.0244293	0.27273	1.9146	0.73128	-0.167871	-0.247477	-0.0708731	0.490477	2.7848	1.42439	0.00152801	0.128911	-0.000524855	0.341087	-0.525196	-0.363918	0.308133	2.14844	0.0505667	0.0679199	1.1767	0.561339
1998-08-15	1998	8	11.9224	14.8583	0.181271		8.86077	1.79107	0.152557	1.91935	-0.252264	-0.0592776	0.272874	3.26179	0.460919	-0.158334	-0.677755	0.102119	0.430006	6.3223	-0.308033	0.00171139	-0.00738964	0.00435443	0.272181	-0.607975	-0.264683	0.255941	3.87476	-0.16123	0.0678824	1.15377	0.254632
1998-09-15	1998	9	11.6728	13.4159	-2.26399		8.80897	2.88216	-0.308373	1.87319	-0.261173	-0.0682534	0.270457	3.25406	-0.0875653	-0.153746	-0.420887	0.0475939	0.364331	5.26841	-1.48313	0.00190553	0.114929	0.00271489	0.201966	-0.6066	-0.196331	0.238104	2.80075	-0.0468154	0.0675984	0.384256	-0.12393
1998-10-15	1998	10	11.2937	4.82113	0.572211		8.73406	2.54356	-0.143398	1.8234	-0.204327	-0.0225742	0.26236	1.14868	0.0534743	-0.117999	-0.0901077	-0.314721	0.217522	1.55662	0.237462	0.00209967	0.114848	0.00260217	0.107642	-0.537809	-0.0756436	0.197551	0.547555	0.906497	0.06704	-0.257874	-0.0713757
1998-11-15	1998	11	10.8038	0.0124608	0.578674		8.61966	1.82116	-0.00483268	1.77358	-0.161024	-1.2329e-05	0.244846	0.268269	0.142351	-0.0840518	0.063054	-0.118058	0.0495306	0.418968	0.176936	0.00210243	-0.0330668	-0.000468335	-0.00794756	-0.400604	0.0620731	0.139606	-1.5966	0.393869	0.0664396	-0.367706	-0.073169
1998-12-15	1998	12	10.3671	-2.5278	-0.018129	Irr Runoff Storage	8.46563	0.856806	0.112331	1.72431	-0.11034	0.0081586	0.221654	-0.879766	-0.000278806	-0.0639335	0.190087	-0.0432906	-0.0515622	-0.17494	-0.071769	0.00227292	-0.131551	-0.000787071	-0.103288	-0.27995	0.121879	0.107888	-1.63038	-0.0734929	0.0640893	-0.367764	-0.0708729
1999-01-15	1999	1	10.2024	-4.23381	-0.172281	0.17358	8.35302	-0.229635	0.0877482	1.68538	-0.042418	-0.00895196	0.221446	-1.48578	-0.11918	-0.071584	0.21654	0.0425842	-0.0411208	-1.0937	0.0256655	0.0024878	0.0578767	-0.000458671	-0.13876	0.016851	0.102878	0.125035	-1.30878	-0.226783	0.066458	-0.364755	-0.075854
1999-02-15	1999	2	9.56233	-5.25462	-0.0994743	0.270893	8.14204	-0.54887	0.185832	1.6549	0.0421368	-0.0249983	0.135318	-1.6771	-0.127187	-0.0521951	-0.00549734	0.110164	-0.274795	-1.93224	0.0321952	0.00285369	0.0578734	-0.000619528	-0.140765	0.437659	-0.0251967	0.0693289	-1.26975	-0.207663	0.02564	-0.358851	-0.04207
1999-03-15	1999	3	9.31001	-6.43354	-0.760173	0.29562	7.99193	-1.0008	0.144559	1.63303	0.122301	-0.0490848	0.0936897	-1.80114	-0.171076	-0.0560819	0.0525351	0.198635	-0.276759	-3.04558	-0.378427	0.0030052	0.0578392	-0.000736814	-0.140789	0.784797	-0.150793	0.0734286	-1.2447	-0.34985	-0.0114521	-0.358798	-0.0034274
1999-04-15	1999	4	9.29805	-7.90418	-1.46001	0.241136	7.86608	-1.95896	-0.00605119	1.61002	0.192323	-0.0725932	0.112156	-1.75865	-0.227667	-0.0593024	0.225936	0.166831	-0.189077	-3.72349	-0.638746	0.00329216	-0.217119	-0.0016842	-0.1408	0.946051	-0.276442	0.109989	-1.24914	-0.406313	-0.0143022	-0.361135	0.0027134
1999-05-15	1999	5	9.28579	-8.44726	-1.32044	0.12204	7.75854	-2.94233	-0.294282	1.58674	0.261873	-0.0768118	0.160442	-1.65481	-0.238521	-0.0576301	0.487845	0.088373	-0.153686	-4.06251	-0.154038	0.00357912	-0.0842509	-0.00403283	-0.139416	0.730885	-0.415009	0.139736	-0.853385	-0.236976	-0.0125176	-0.330594	0.0108454
1999-06-15	1999	6	9.10479	-5.68386	-0.186542	-0.0297566	7.63441	-2.89435	-0.204464	1.56288	0.248317	-0.0280474	0.178131	-0.612639	-0.182827	-0.0532256	0.223625	0.00968989	-0.190393	-2.41646	0.367376	0.00379857	-0.0579587	-0.00208347	-0.136085	0.0120794	-0.12915	0.117783	-0.201664	-0.0410246	-0.0125332	0.0151638	0.023988
1999-07-15	1999	7	8.97395	6.61558	-1.33847	-0.17358	7.5087	-0.770643	-0.310127	1.53917	0.00546613	0.0344661	0.182987	1.9146	-0.21251	-0.0498187	-0.247477	0.0437424	-0.180986	2.7848	-0.708238	0.00381424	0.128911	0.00157962	-0.12989	-0.525196	0.0830065	0.112492	2.14844	-0.422263	-0.0125337	1.1767	0.151977
1999-08-15	1999	8	8.80336	14.8583	0.272431	-0.270893	7.3744	1.79107	-0.162344	1.51749	-0.252264	0.0800828	0.182193	3.26179	0.0520604	-0.0413467	-0.677755	-0.0615107	-0.197533	6.3223	0.295934	0.00400851	-0.00738964	0.00387534	-0.124895	-0.607975	0.1321	0.10133	3.87476	0.0425778	-0.01229	1.15377	-0.1103
1999-09-15	1999	9	8.69505	13.4159	0.570249	-0.29562	7.2409	2.88216	-0.250552	1.49792	-0.261173	0.0308776	0.18564	3.25406	0.218851	-0.0519534	-0.420887	-0.0928446	-0.18347	5.26841	0.116866	0.00419677	0.114929	0.00386717	-0.0895586	-0.6066	0.0950599	0.103228	2.80075	0.526783	-0.0118627	0.384256	-0.0786702
1999-10-15	1999	10	8.61658	4.82113	3.10221	-0.241136	7.10973	2.54356	0.190404	1.48118	-0.204327	0.0403047	0.190903	1.14868	0.704361	-0.0608428	-0.0901077	-0.35181	-0.158226	1.55662	1.0379	0.00438502	0.114848	0.00376032	-0.0429699	-0.537809	0.0915827	0.103811	0.547555	1.35721	-0.0113842	-0.257874	0.0284638
1999-11-15	1999	11	8.58969	0.0124608	0.6207	-0.12204	6.98872	1.82116	0.136606	1.46476	-0.161024	0.0225462	0.199688	0.268269	0.399769	-0.0697215	0.063054	-0.0795335	-0.109684	0.418968	-0.104327	0.00438782	-0.0330668	-0.000120257	0.00996694	-0.400604	0.084119	0.111939	-1.5966	0.158092	-0.0103762	-0.367706	0.00345893
1999-12-15	1999	12	8.64402	-2.5278	0.134844	0.0297566	6.90541	0.856806	0.164007	1.44843	-0.11034	-0.000541452	0.227004	-0.879766	0.0526497	-0.0822572	0.190087	0.0159161	-0.0463507	-0.17494	0.035894	0.00459069	-0.131551	-0.00291676	0.0494277	-0.27995	0.0435108	0.140816	-1.63038	-0.169905	-0.0030566	-0.367764	-0.00373298
2000-01-15	2000	1	9.00071	-4.23381	-1.01761		6.88946	-0.229635	-0.060262	1.42763	-0.042418	-0.0113346	0.336209	-1.48578	-0.243476	-0.104311	0.21654	0.176975	0.175345	-1.0937	-0.389354	0.00480035	0.0578767	-0.000440052	0.0467718	0.016851	-0.0227133	0.183203	-1.30878	-0.418904	0.0415885	-0.364755	-0.048059
2000-02-15	2000	2	9.22666	-5.25462	-1.0636		6.91686	-0.54887	-0.191039	1.40199	0.0421368	-0.00689727	0.412711	-1.6771	-0.363213	-0.12632	-0.00549734	0.0570079	0.309303	-1.93224	-0.383154	0.00514548	0.0578734	-0.000652232	0.0463424	0.437659	0.21173	0.234767	-1.26975	-0.350323	0.0258541	-0.358851	-0.0371564
2000-03-15	2000	3	9.00336	-6.43354	-1.3951		6.87523	-1.0008	-0.312717	1.37322	0.122301	0.00975123	0.39042	-1.80114	-0.404656	-0.118652	0.0525351	0.154532	0.229606	-3.04558	-0.581868	0.00528122	0.0578392	-0.000753755	0.0463882	0.784797	0.221095	0.209409	-1.2447	-0.478835	-0.00756719	-0.358798	-0.00157102
2000-04-15	2000	4	8.8055	-7.90418	-1.29015		6.82989	-1.95896	-0.422006	1.35234	0.192323	-0.0119027	0.372456	-1.75865	-0.382536	-0.110094	0.225936	0.111079	0.155797	-3.72349	-0.401113	0.00554882	-0.217119	-0.00390723	0.046737	0.946051	0.171263	0.138767	-1.24914	-0.337545	0.0140454	-0.361135	-0.0135378
2000-05-15	2000	5	8.16566	-8.44726	0.45167		6.70733	-2.94233	-0.24283	1.32866	0.261873	-0.0146659	0.269807	-1.65481	-0.0200985	-0.044041	0.487845	-0.0756452	-0.0762872	-4.06251	0.528564	0.00581642	-0.0842509	-0.0038358	0.0405934	0.730885	-0.12149	-0.0758727	-0.853385	0.325154	0.00964591	-0.330594	0.0765168
2000-06-15	2000	6	7.84304	-5.68386	5.35541		6.58894	-2.89435	0.649601	1.30638	0.248317	-0.0211631	0.19343	-0.612639	1.11233	-0.0206337	0.223625	-0.287551	-0.139565	-2.41646	2.9769	0.00603068	-0.0579587	-0.00179957	0.0278629	0.0120794	-0.324969	-0.129355	-0.201664	0.714752	0.0099435	0.0151638	0.537252
2000-07-15	2000	7	7.57314	6.61558	2.77383		6.46548	-0.770643	1.06194	1.28473	0.00546613	-0.018842	0.152581	1.9146	0.735926	-0.00557149	-0.247477	-0.264615	-0.211048	2.7848	0.929322	0.00603254	0.128911	0.00350284	0.0154127	-0.525196	-0.0674485	-0.144624	2.14844	0.453623	0.010126	1.1767	-0.0594957
2000-08-15	2000	8	7.34477	14.8583	-0.948567		6.34639	1.79107	0.366159	1.26303	-0.252264	-0.0106008	0.136693	3.26179	-0.169926	-0.00513594	-0.677755	-0.00569683	-0.268665	6.3223	-0.589295	0.00620635	-0.00738964	0.00330637	0.00378111	-0.607975	0.00397345	-0.147584	3.87476	-0.0128021	0.0100489	1.15377	-0.533694
2000-09-15	2000	9	7.01276	13.4159	-0.12188		6.21683	2.88216	0.229327	1.23889	-0.261173	0.0393106	0.122468	3.25406	0.0664541	0.0153435	-0.420887	-0.0574474	-0.367658	5.26841	-0.584656	0.00638101	0.114929	0.00489412	-0.0510041	-0.6066	0.0606907	-0.178336	2.80075	-0.0393641	0.00984451	0.384256	0.158974
2000-10-15	2000	10	6.71199	4.82113	-2.67122		6.0877	2.54356	-0.258266	1.2137	-0.204327	0.0236466	0.114486	1.14868	-0.451011	0.0204152	-0.0901077	0.359567	-0.438741	1.55662	-1.4666	0.00655567	0.114848	0.00480088	-0.112484	-0.537809	0.0873733	-0.189248	0.547555	-0.925406	0.00958405	-0.257874	-0.0452987
2000-11-15	2000	11	6.44137	0.0124608	-1.10244		5.95794	1.82116	-0.253266	1.19007	-0.161024	0.029859	0.107786	0.268269	-0.424851	0.0167758	0.063054	0.114857	-0.496346	0.418968	-0.476995	0.0065198	-0.0330668	0.000318908	-0.161466	-0.400604	0.102787	-0.188771	-1.5966	-0.182982	0.00886714	-0.367706	-0.0122133
2000-12-15	2000	12	6.19999	-2.5278	-0.659977	Reservoirs+	5.81666	0.856806	-0.228693	1.16654	-0.11034	0.021587	0.0945382	-0.879766	-0.305075	0.0172686	0.190087	0.0971364	-0.535215	-0.17494	-0.333044	0.00666695	-0.131551	-0.00497072	-0.184149	-0.27995	0.127685	-0.185314	-1.63038	-0.0270011	0.00298121	-0.367764	-0.00758117
2001-01-15	2001	1	5.79015	-4.23381	-0.547405	-1.83369	5.667	-0.229635	-0.267008	1.14203	-0.042418	0.0138488	0.0314442	-1.48578	-0.129373	0.0136527	0.21654	0.0642381	-0.665388	-1.0937	-0.240019	0.00671236	0.0578767	-0.000266315	-0.183785	0.016851	0.0682642	-0.183257	-1.30878	-0.087971	-0.0382619	-0.364755	0.0308669
2001-02-15	2001	2	5.70076	-5.25462	-1.52181	-3.3888	5.56133	-0.54887	-0.390197	1.11073	0.0421368	-0.00533642	-0.0111281	-1.6771	-0.110073	0.0171003	-0.00549734	0.15934	-0.570692	-1.93224	-0.691075	0.0068704	0.0578734	-0.000281223	-0.184783	0.437659	-0.214566	-0.182322	-1.26975	-0.30226	-0.0463578	-0.358851	0.0326023
2001-03-15	2001	3	5.51766	-6.43354	-1.51873	-4.03588	5.43959	-1.0008	-0.426628	1.07939	0.122301	0.00133346	-0.0649847	-1.80114	-0.0450302	0.0173948	0.0525351	0.0793461	-0.535432	-3.04558	-0.669825	0.0068072	0.0578392	-0.000183806	-0.184867	0.784797	-0.285405	-0.175056	-1.2447	-0.225308	-0.0651957	-0.358798	0.0529319
2001-04-15	2001	4	4.94902	-7.90418	-0.681036	-3.60156	5.25445	-1.95896	-0.403695	1.04477	0.192323	0.0120311	-0.171662	-1.75865	0.081183	0.0577411	0.225936	-0.100429	-0.685949	-3.72349	-0.250626	0.00686979	-0.217119	-0.00565866	-0.185219	0.946051	-0.184573	-0.284357	-1.24914	0.0912943	-0.0876401	-0.361135	0.0795448
2001-05-15	2001	5	4.92263	-8.44726	0.798038	-2.2022	5.10639	-2.94233	-0.337211	1.01117	0.261873	0.0204805	-0.186249	-1.65481	0.276981	0.0190482	0.487845	-0.13282	-0.561586	-4.06251	0.547438	0.00693251	-0.0842509	-0.00318609	-0.186922	0.730885	-0.166163	-0.214451	-0.853385	0.505222	-0.0717272	-0.330594	0.0872588
2001-06-15	2001	6	4.74586	-5.68386	3.53461	-0.21276	4.94799	-2.89435	0.494653	0.976158	0.248317	0.0149096	-0.191271	-0.612639	0.7399	0.0123085	0.223625	-0.363885	-0.535264	-2.41646	1.81052	0.00690721	-0.0579587	-0.00213122	-0.192121	0.0120794	-0.100619	-0.207051	-0.201664	0.817131	-0.071822	0.0151638	0.1241
2001-07-15	2001	7	4.57636	6.61558	4.69793	1.83369	4.79735	-0.770643	1.46201	0.941226	0.00546613	-0.0508938	-0.198132	1.9146	0.575771	0.00744753	-0.247477	-0.236262	-0.500697	2.7848	2.35532	0.00699048	0.128911	0.00444143	-0.201895	-0.525196	0.137878	-0.204151	2.14844	0.524375	-0.0718197	1.1767	-0.0747009
2001-08-15	2001	8	4.42441	14.8583	-0.225449	3.3888	4.64186	1.79107	0.609751	0.904396	-0.252264	-0.0280133	-0.200896	3.26179	-0.478617	0.000653792	-0.677755	-0.00795189	-0.45413	6.3223	0.01929	0.00526188	-0.00738964	0.00349242	-0.21043	-0.607975	0.217176	-0.190673	3.87476	0.117477	-0.0716654	1.15377	-0.678035
2001-09-15	2001	9	4.42665	13.4159	-4.35942	4.03588	4.50603	2.88216	-0.281558	0.870771	-0.261173	-0.00799671	-0.194291	3.25406	-0.896914	-0.0305833	-0.420887	0.472635	-0.352249	5.26841	-2.40627	0.00353053	0.114929	0.00849565	-0.179009	-0.6066	0.184481	-0.126814	2.80075	-1.4025	-0.0707729	0.384256	-0.0297411
2001-10-15	2001	10	4.43991	4.82113	-0.715829	3.60156	4.37108	2.54356	-0.318263	0.837208	-0.204327	-0.00311291	-0.186506	1.14868	-0.325064	-0.0383146	-0.0901077	-0.0460188	-0.270992	1.55662	-0.141991	0.00179918	0.114848	0.01031	-0.123695	-0.537809	0.078149	-0.0802712	0.547555	-0.195518	-0.0704335	-0.257874	0.225673
2001-11-15	2001	11	4.40657	0.0124608	-1.1889	2.2022	4.23628	1.82116	-0.432486	0.8043	-0.161024	-0.00450127	-0.180006	0.268269	-0.197317	-0.0336628	0.063054	0.0844195	-0.211807	0.418968	-0.445666	0.0017993	-0.0330668	0.00473587	-0.0867058	-0.400604	-0.0343678	-0.0534567	-1.5966	-0.22949	-0.0702091	-0.367706	0.0657259
2001-12-15	2001	12	4.26601	-2.5278	-0.760047	0.21276	4.10178	0.856806	-0.321426	0.771474	-0.11034	-0.00253367	-0.183638	-0.879766	-0.109241	-0.0263299	0.190087	0.0824038	-0.21022	-0.17494	-0.243235	0.000149621	-0.131551	0.0025458	-0.0494979	-0.27995	-0.124252	-0.0658314	-1.63038	-0.111688	-0.0719031	-0.367764	0.0673298
2002-01-15	2002	1	3.80083	-4.23381	-0.381397		3.89802	-0.229635	-0.363993	0.739063	-0.042418	-0.0251393	-0.244872	-1.48578	0.113777	-0.0104288	0.21654	0.00679474	-0.343708	-1.0937	-0.00289177	-0.00153253	0.0578767	-0.0127646	-0.0194925	0.016851	-0.19845	-0.122455	-1.30878	0.0129654	-0.0937972	-0.364755	0.0882538
2002-02-15	2002	2	2.65527	-5.25462	1.55053		3.4839	-0.54887	0.0573534	0.714028	0.0421368	-0.0121425	-0.379303	-1.6771	0.337364	0.0404816	-0.00549734	-0.238886	-0.791165	-1.93224	0.751961	-0.00370299	0.0578734	-0.010484	-0.0170956	0.437659	-0.00520194	-0.250072	-1.26975	0.531792	-0.141829	-0.358851	0.138784
2002-03-15	2002	3	1.91615	-6.43354	2.24187		3.05478	-1.0008	0.338793	0.688279	0.122301	-0.0103058	-0.418637	-1.80114	0.402042	0.0603395	0.0525351	-0.0563745	-1.05932	-3.04558	0.829145	-0.00434153	0.0578392	-0.00981125	-0.0170515	0.784797	0.210547	-0.290415	-1.2447	0.448569	-0.0975207	-0.358798	0.0893291
2002-04-15	2002	4	1.71021	-7.90418	2.15777		2.72897	-1.95896	0.504101	0.668939	0.192323	-0.00702845	-0.389212	-1.75865	0.37673	0.0178707	0.225936	-0.00473744	-1.01007	-3.72349	0.783718	-0.00604841	-0.217119	0.00726096	-0.0162394	0.946051	0.0903203	-0.181226	-1.24914	0.309938	-0.102818	-0.361135	0.097416
2002-05-15	2002	5	1.2231	-8.44726	2.81084		2.40506	-2.94233	0.75011	0.649068	0.261873	-0.0113367	-0.402377	-1.65481	0.449528	0.0326569	0.487845	-0.0584334	-1.13253	-4.06251	1.13743	-0.00775542	-0.0842509	-0.00829429	-0.00959745	0.730885	0.103008	-0.189209	-0.853385	0.331484	-0.122247	-0.330594	0.117451
2002-06-15	2002	6	0.864043	-5.68386	1.83423		2.10943	-2.89435	0.888147	0.629626	0.248317	-0.0274939	-0.400291	-0.612639	0.214116	0.0219402	0.223625	-0.182704	-1.18932	-2.41646	0.862717	-0.00959021	-0.0579587	-0.00581966	0.000292954	0.0120794	0.0670315	-0.175793	-0.201664	0.106392	-0.122277	0.0151638	-0.0881731
2002-07-15	2002	7	0.493089	6.61558	-4.96551		1.81607	-0.770643	-0.526191	0.610585	0.00546613	-0.0206645	-0.395917	1.9146	-0.839615	0.0154088	-0.247477	0.366702	-1.26473	2.7848	-2.25013	-0.0098679	0.128911	-0.0047457	0.00995834	-0.525196	-0.0452133	-0.166187	2.14844	-1.04499	-0.122252	1.1767	-0.60065
2002-08-15	2002	8	0.126923	14.8583	-4.79744		1.54414	1.79107	-1.44195	0.59515	-0.252264	-0.0277532	-0.394459	3.26179	-0.757061	0.0118789	-0.677755	0.219118	-1.34243	6.3223	-2.31027	-0.00899047	-0.00738964	0.0100823	0.0143729	-0.607975	-0.00709804	-0.170436	3.87476	-0.386873	-0.122313	1.15377	-0.0956889
2002-09-15	2002	9	-0.159449	13.4159	-2.24458		1.28098	2.88216	-0.966169	0.580323	-0.261173	0.0503643	-0.390297	3.25406	-0.347818	0.00513185	-0.420887	-0.0727064	-1.38294	5.26841	-0.784573	-0.00810646	0.114929	-0.000349879	0.0175783	-0.6066	-0.00236066	-0.139929	2.80075	-0.0791214	-0.122195	0.384256	-0.0418905
2002-10-15	2002	10	-0.453328	4.82113	-1.66795		1.02866	2.54356	-0.862799	0.564574	-0.204327	0.0310754	-0.387601	1.14868	-0.281941	-0.00588617	-0.0901077	0.0989874	-1.41451	1.55662	-0.46804	-0.00722244	0.114848	-0.00115248	0.0122471	-0.537809	0.0219104	-0.121274	0.547555	-0.250312	-0.122327	-0.257874	0.0444213
2002-11-15	2002	11	-0.756857	0.0124608	-0.334112		0.774262	1.82116	-0.518077	0.547851	-0.161024	0.0186415	-0.384654	0.268269	0.0323595	-0.00192043	0.063054	-0.0759223	-1.45789	0.418968	0.118948	-0.0072263	-0.0330668	-0.00825598	0.00901854	-0.400604	-0.0114073	-0.113879	-1.5966	-0.00807429	-0.122418	-0.367706	0.117572
2002-12-15	2002	12	-1.09406	-2.5278	0.148579	Rice Paddy	0.517406	0.856806	-0.257318	0.530831	-0.11034	0.00961677	-0.39465	-0.879766	0.154257	0.00382735	0.190087	-0.0261312	-1.50813	-0.17494	0.149717	-0.00621304	-0.131551	0.00557621	0.0152671	-0.27995	-0.0730327	-0.127875	-1.63038	0.0656267	-0.124524	-0.367764	0.12026
2003-01-15	2003	1	-1.40193	-4.23381	0.427366	-0.0135334	0.233409	-0.229635	0.0374349	0.51756	-0.042418	0.0111372	-0.400207	-1.48578	0.286605	0.0293142	0.21654	-0.0753071	-1.55706	-1.0937	0.278144	-0.00516918	0.0578767	0.00140113	0.0217365	0.016851	-0.186704	-0.127369	-1.30878	-0.0330982	-0.114147	-0.364755	0.10786
2003-02-15	2003	2	-0.95411	-5.25462	1.72346	-0.0414125	0.137747	-0.54887	0.245545	0.507889	0.0421368	0.0160831	-0.291683	-1.6771	0.299699	-0.0144357	-0.00549734	-0.264933	-1.26146	-1.93224	0.736082	-0.0039248	0.0578734	0.000345937	0.0230673	0.437659	-0.00689972	0.00191315	-1.26975	0.645885	-0.0532257	-0.358851	0.0516018
2003-03-15	2003	3	-0.741068	-6.43354	1.37253	-0.0581951	0.120901	-1.0008	0.24484	0.495281	0.122301	-0.00629529	-0.227751	-1.80114	0.243505	-0.0393854	0.0525351	-0.0888657	-1.10937	-3.04558	0.500437	-0.00371928	0.0578392	0.000174628	0.0230808	0.784797	0.10644	0.0619226	-1.2447	0.32009	-0.0620392	-0.358798	0.05227
2003-04-15	2003	4	-0.225973	-7.90418	0.451601	-0.0593844	0.166474	-1.95896	0.0138666	0.473272	0.192323	-0.0120489	-0.093798	-1.75865	0.116677	-0.0537101	0.225936	0.114432	-0.900812	-3.72349	0.153837	-0.00282727	-0.217119	0.00399357	0.0222787	0.946051	0.0130592	0.16263	-1.24914	0.0548179	0.000519332	-0.361135	-0.00702308
2003-05-15	2003	5	0.310499	-8.44726	-0.322966	-0.0446617	0.272044	-2.94233	-0.199149	0.450951	0.261873	-0.0174583	0.0528981	-1.65481	-0.125704	-0.0820436	0.487845	0.12524	-0.660575	-4.06251	0.0626289	-0.00193526	-0.0842509	-0.00195534	0.0165385	0.730885	0.151855	0.246135	-0.853385	-0.271812	0.0164763	-0.330594	-0.0465385
2003-06-15	2003	6	0.587598	-5.68386	-1.58374	-0.0179719	0.363332	-2.89435	-0.773719	0.428553	0.248317	0.0143269	0.130396	-0.612639	-0.383245	-0.084338	0.223625	0.229417	-0.546853	-2.41646	-0.366907	-0.000869589	-0.0579587	-0.002014	0.0101	0.0120794	0.134857	0.270656	-0.201664	-0.333978	0.0166192	0.0151638	-0.102543
2003-07-15	2003	7	0.805135	6.61558	0.0962375	0.0135334	0.453054	-0.770643	-0.311124	0.406165	0.00546613	0.0677087	0.172335	1.9146	-0.105586	-0.0895775	-0.247477	-0.053311	-0.438635	2.7848	0.470891	-0.000777198	0.128911	0.0010962	0.00541224	-0.525196	-0.0246975	0.280532	2.14844	0.0596692	0.0166221	1.1767	-0.00847266
2003-08-15	2003	8	1.03394	14.8583	-3.14795	0.0414125	0.529836	1.79107	-0.629792	0.382078	-0.252264	0.0340232	0.193421	3.26179	-0.577761	-0.0950165	-0.677755	0.0266165	-0.315043	6.3223	-1.51251	-0.000976084	-0.00738964	0.00453417	0.00892856	-0.607975	-0.00149187	0.313917	3.87476	-0.151112	0.0167788	1.15377	-0.340543
2003-09-15	2003	9	1.07323	13.4159	2.70388	0.0581951	0.584097	2.88216	0.277585	0.352782	-0.261173	0.0137954	0.195613	3.25406	0.673714	-0.0720002	-0.420887	-0.167471	-0.259128	5.26841	0.594299	-0.00118559	0.114929	0.00343333	-0.0103939	-0.6066	0.0159871	0.267647	2.80075	0.721785	0.0157841	0.384256	0.570832
2003-10-15	2003	10	1.00444	4.82113	3.31194	0.0593844	0.612152	2.54356	0.820551	0.321064	-0.204327	0.00673664	0.188456	1.14868	0.902355	-0.0452817	-0.0901077	-0.201618	-0.238262	1.55662	1.23856	-0.0013951	0.114848	0.00372425	-0.071947	-0.537809	0.0372216	0.223912	0.547555	0.406572	0.0157218	-0.257874	0.097857
2003-11-15	2003	11	0.959473	0.0124608	1.27475	0.0446617	0.629995	1.82116	0.721648	0.291181	-0.161024	0.0065356	0.182859	0.268269	0.394816	-0.0383683	0.063054	-0.067007	-0.190979	0.418968	0.216701	-0.00141871	-0.0330668	-0.00127547	-0.137034	-0.400604	0.0573831	0.207439	-1.5966	-0.0351428	0.0157788	-0.367706	-0.0189107
2003-12-15	2003	12	0.958115	-2.5278	0.706846	0.0179719	0.65091	0.856806	0.685838	0.261969	-0.11034	0.00982118	0.187076	-0.879766	0.0758099	-0.0392872	0.190087	-0.0458908	-0.133824	-0.17494	0.0740249	-0.00159278	-0.131551	0.00206463	-0.205758	-0.27995	0.0917394	0.219501	-1.63038	-0.163235	0.0191042	-0.367764	-0.023333
2004-01-15	2004	1	1.18099	-4.23381	0.590095		0.737254	-0.229635	0.454976	0.232205	-0.042418	0.00745251	0.22959	-1.48578	-0.0901634	-0.0639815	0.21654	-0.0472803	0.00792432	-1.0937	0.196275	-0.00181148	0.0578767	-0.0043432	-0.247719	0.016851	0.124947	0.251763	-1.30878	-0.0116148	0.0357491	-0.364755	-0.0401544
2004-02-15	2004	2	0.920198	-5.25462	0.320657		0.734935	-0.54887	0.29948	0.204768	0.0421368	-0.0323547	0.199283	-1.6771	-0.164971	-0.0483673	-0.00549734	0.045195	-0.119923	-1.93224	0.265516	-0.00205322	0.0578734	-0.00403975	-0.251493	0.437659	0.0357913	0.19761	-1.26975	-0.105046	0.00543256	-0.358851	-0.0189923
2004-03-15	2004	3	0.79177	-6.43354	-0.985804		0.694469	-1.0008	0.00794183	0.180843	0.122301	-0.0724685	0.151988	-1.80114	-0.222111	-0.0380477	0.0525351	0.230418	-0.116213	-3.04558	-0.242333	-0.00216972	0.0578392	-0.00388902	-0.251572	0.784797	-0.357545	0.173156	-1.2447	-0.315968	-0.000680171	-0.358798	-0.00983752
2004-04-15	2004	4	0.065105	-7.90418	-0.379082		0.532481	-1.95896	-0.13803	0.156955	0.192323	-0.0543364	-0.0276734	-1.75865	-0.0166073	0.00471842	0.225936	0.138964	-0.264488	-3.72349	0.0849097	-0.00240026	-0.217119	0.00328321	-0.251117	0.946051	-0.494591	0.00311969	-1.24914	0.0166508	-0.086496	-0.361135	0.0806762
2004-05-15	2004	5	-0.425718	-8.44726	0.396959		0.33251	-2.94233	-0.00863793	0.135233	0.261873	-0.0522836	-0.155784	-1.65481	0.13358	0.00552153	0.487845	0.0266482	-0.375454	-4.06251	0.463376	-0.00263079	-0.0842509	-0.0033486	-0.242524	0.730885	-0.413764	-0.0256738	-0.853385	0.14474	-0.0969215	-0.330594	0.106765
2004-06-15	2004	6	-0.729238	-5.68386	2.40761		0.139883	-2.89435	0.485864	0.113747	0.248317	-0.0280334	-0.224579	-0.612639	0.481894	0.0135141	0.223625	-0.164767	-0.405402	-2.41646	1.19262	-0.00289746	-0.0579587	-0.00261051	-0.230998	0.0120794	-0.127578	-0.0354716	-0.201664	0.359296	-0.0970348	0.0151638	0.21085
2004-07-15	2004	7	-0.986609	6.61558	-1.24153		-0.0541887	-0.770643	0.168287	0.0920959	0.00546613	0.0525389	-0.260921	1.9146	-0.0360093	0.023066	-0.247477	0.0214167	-0.424724	2.7848	-1.07718	-0.00294974	0.128911	0.000367841	-0.221392	-0.525196	0.156815	-0.0405682	2.14844	-0.269071	-0.0970246	1.1767	-0.258625
2004-08-15	2004	8	-1.24635	14.8583	-2.40881		-0.24824	1.79107	-0.337312	0.0712874	-0.252264	0.0577125	-0.279056	3.26179	-0.672832	0.0373346	-0.677755	0.0181	-0.461207	6.3223	-1.32183	-0.00209355	-0.00738964	0.00425356	-0.205863	-0.607975	0.21235	-0.0614972	3.87476	-0.0691459	-0.0970166	1.15377	-0.300101
2004-09-15	2004	9	-1.39072	13.4159	-3.55215		-0.428782	2.88216	-0.653384	0.0557791	-0.261173	0.0241428	-0.283986	3.25406	-1.00262	0.028734	-0.420887	0.244989	-0.467722	5.26841	-0.976411	-0.00122955	0.114929	0.000710911	-0.152255	-0.6066	0.163314	-0.0447576	2.80075	-1.00624	-0.0965006	0.384256	-0.346672
2004-10-15	2004	10	-1.43127	4.82113	-0.14223		-0.58906	2.54356	-0.377895	0.0422184	-0.204327	0.0249127	-0.277412	1.14868	-0.1691	0.0109753	-0.0901077	-0.248238	-0.436663	1.55662	0.105372	-0.000365542	0.114848	-7.16809e-05	-0.0692035	-0.537809	0.137585	-0.0153767	0.547555	0.300339	-0.0963924	-0.257874	0.0848648
2004-11-15	2004	11	-1.4896	0.0124608	0.0815808		-0.732574	1.82116	-0.227306	0.027913	-0.161024	0.0119792	-0.276851	0.268269	0.0289831	0.00259471	0.063054	-0.0120589	-0.415964	0.418968	0.082308	-0.000367225	-0.0330668	-0.00552704	0.0219707	-0.400604	0.0367002	-0.0198788	-1.5966	0.0746009	-0.0964416	-0.367706	0.09195
2004-12-15	2004	12	-1.6015	-2.5278	0.178008	Snow	-0.876129	0.856806	-0.115981	0.0126103	-0.11034	-0.000635864	-0.285735	-0.879766	0.112523	0.00220557	0.190087	0.0272386	-0.432306	-0.17494	0.140639	0.00041277	-0.131551	-0.000568233	0.114339	-0.27995	-0.113089	-0.0372395	-1.63038	0.0323465	-0.0996592	-0.367764	0.0955521
2005-01-15	2005	1	-2.09624	-4.23381	0.750444	0.220774	-1.11742	-0.229635	-0.0189616	-0.00318504	-0.042418	-0.00686023	-0.358584	-1.48578	0.280387	0.0442864	0.21654	0.0156758	-0.619051	-1.0937	0.385458	0.00120339	0.0578767	0.00291617	0.183819	0.016851	-0.120245	-0.101304	-1.30878	0.0903037	-0.126008	-0.364755	0.121699
2005-02-15	2005	2	-1.76949	-5.25462	1.27792	0.55266	-1.2176	-0.54887	0.085511	-0.0236309	0.0421368	0.0099443	-0.290517	-1.6771	0.265666	0.0386337	-0.00549734	-0.145013	-0.386717	-1.93224	0.454137	0.00219198	0.0578734	0.0020831	0.193936	0.437659	0.23366	-0.0472104	-1.26975	0.34065	-0.0385821	-0.358851	0.0312141
2005-03-15	2005	3	-1.86676	-6.43354	1.18611	0.736462	-1.32016	-1.0008	0.0992301	-0.0446832	0.122301	-0.00966972	-0.262245	-1.80114	0.271015	0.0423735	0.0525351	-0.0631073	-0.337482	-3.04558	0.351637	0.00242896	0.0578392	0.00188034	0.194169	0.784797	0.193331	-0.0899046	-1.2447	0.299664	-0.0512625	-0.358798	0.0420433
2005-04-15	2005	4	-2.00631	-7.90418	0.992404	0.722929	-1.44864	-1.95896	0.120922	-0.0652025	0.192323	-0.00384413	-0.257174	-1.75865	0.219619	0.0283942	0.225936	0.0147215	-0.402237	-3.72349	0.471047	0.0031719	-0.217119	-0.00230915	0.193811	0.946051	0.154571	-0.0114915	-1.24914	-0.0227634	-0.0469658	-0.361135	0.0405566
2005-05-15	2005	5	-2.21531	-8.44726	0.843707	0.515688	-1.57063	-2.94233	0.171843	-0.0871774	0.261873	-0.0135056	-0.276949	-1.65481	0.148135	0.0470556	0.487845	-0.0195555	-0.429974	-4.06251	0.321796	0.00391485	-0.0842509	-0.000534294	0.190191	0.730885	0.26194	-0.0448784	-0.853385	-0.0443835	-0.0468765	-0.330594	0.0181086
2005-06-15	2005	6	-2.37112	-5.68386	-1.88742	0.170269	-1.70806	-2.89435	-0.561703	-0.109929	0.248317	0.00609796	-0.281196	-0.612639	-0.335671	0.0575411	0.223625	0.296176	-0.438941	-2.41646	-1.01479	0.00475131	-0.0579587	-0.000771888	0.189122	0.0120794	0.286067	-0.0381654	-0.201664	-0.406786	-0.0462596	0.0151638	-0.156107
2005-07-15	2005	7	-2.54488	6.61558	4.23776	-0.220774	-1.85896	-0.770643	0.770907	-0.133578	0.00546613	0.0328627	-0.2808	1.9146	0.800679	0.060235	-0.247477	-0.0835847	-0.442068	2.7848	1.72817	0.00485978	0.128911	0.00442151	0.18662	-0.525196	-0.129795	-0.0351259	2.14844	0.374611	-0.0460959	1.1767	0.739553
2005-08-15	2005	8	-2.7705	14.8583	-2.05182	-0.55266	-2.01995	1.79107	0.203684	-0.155208	-0.252264	0.0315799	-0.283278	3.26179	-0.329358	0.0698505	-0.677755	0.0304624	-0.465144	6.3223	-0.727069	0.00513	-0.00738964	-0.000126277	0.17215	-0.607975	-0.162867	-0.0479346	3.87476	-0.595039	-0.0461331	1.15377	-0.503149
2005-09-15	2005	9	-3.15178	13.4159	-3.46579	-0.736462	-2.20476	2.88216	-0.419152	-0.181436	-0.261173	0.0151267	-0.292192	3.25406	-0.933562	0.109717	-0.420887	-0.00374671	-0.540774	5.26841	-1.68041	0.00539912	0.114929	0.00299759	0.10473	-0.6066	-0.0979617	-0.105927	2.80075	-0.00411505	-0.0465336	0.384256	-0.345079
2005-10-15	2005	10	-3.45556	4.82113	-0.625892	-0.722929	-2.38594	2.54356	-0.044887	-0.206214	-0.204327	0.00964694	-0.299256	1.14868	-0.384548	0.113057	-0.0901077	-0.126382	-0.560851	1.55662	-0.103285	0.00566824	0.114848	0.00280988	0.0369621	-0.537809	-0.0120322	-0.112515	0.547555	-0.00316498	-0.0464611	-0.257874	0.0360047
2005-11-15	2005	11	-3.69879	0.0124608	0.421071	-0.515688	-2.57266	1.82116	-0.0363879	-0.23101	-0.161024	-0.00211549	-0.301253	0.268269	0.00241314	0.120014	0.063054	-0.00365184	-0.567562	0.418968	0.126303	0.00560639	-0.0330668	-0.00146312	-0.0115032	-0.400604	0.0573568	-0.0939578	-1.5966	0.229236	-0.0464588	-0.367706	0.0493707
2005-12-15	2005	12	-3.8739	-2.5278	0.365212	-0.170269	-2.74665	0.856806	-0.0562483	-0.256127	-0.11034	-0.0156848	-0.289397	-0.879766	0.120946	0.121506	0.190087	-0.0597358	-0.538603	-0.17494	0.209405	0.00590636	-0.131551	-0.00476025	-0.0672834	-0.27995	0.0385059	-0.0587952	-1.63038	0.0903761	-0.0444669	-0.367764	0.0423238
2006-01-15	2006	1	-3.7512	-4.23381	-0.301985		-2.8011	-0.229635	-0.267171	-0.281369	-0.042418	0.0117561	-0.214851	-1.48578	0.106913	0.0794307	0.21654	0.0959171	-0.364543	-1.0937	-0.145965	0.00610138	0.0578767	0.00126084	-0.134627	0.016851	0.0245542	-0.00507599	-1.30878	-0.159629	-0.035176	-0.364755	0.030421
2006-02-15	2006	2	-4.33861	-5.25462	-0.728308		-2.96386	-0.54887	-0.386006	-0.315815	0.0421368	-0.0126031	-0.291958	-1.6771	0.160137	0.0840401	-0.00549734	0.287978	-0.569699	-1.93224	-0.270438	0.00637039	0.0578734	0.00113414	-0.143944	0.437659	-0.237499	-0.0296146	-1.26975	-0.372849	-0.11415	-0.358851	0.101976
2006-03-15	2006	3	-4.58996	-6.43354	0.263955		-3.09392	-1.0008	-0.301079	-0.348198	0.122301	-0.00349499	-0.337214	-1.80114	0.261216	0.0938108	0.0525351	-0.0744674	-0.633037	-3.04558	0.406273	0.00633806	0.0578392	0.00120068	-0.144164	0.784797	-0.281547	-0.0180926	-1.2447	0.148787	-0.115488	-0.358798	0.107138
2006-04-15	2006	4	-4.55856	-7.90418	0.625904		-3.17439	-1.95896	-0.394052	-0.377305	0.192323	0.0107083	-0.327082	-1.75865	0.265568	0.111979	0.225936	0.0146271	-0.501062	-3.72349	0.489334	0.00648399	-0.217119	-0.00636344	-0.14422	0.946051	-0.0889816	-0.0523709	-1.24914	0.240806	-0.100598	-0.361135	0.0942169
2006-05-15	2006	5	-4.76447	-8.44726	1.29151		-3.29381	-2.94233	-0.192862	-0.406629	0.261873	0.00453883	-0.323685	-1.65481	0.337145	0.134243	0.487845	-0.0888407	-0.532078	-4.06251	0.771413	0.00662991	-0.0842509	0.000350346	-0.145516	0.730885	-0.0717161	-0.0982355	-0.853385	0.430926	-0.105398	-0.330594	0.100533
2006-06-15	2006	6	-4.91343	-5.68386	2.12732		-3.39002	-2.89435	0.466943	-0.434968	0.248317	0.0282429	-0.33226	-0.612639	0.609939	0.128646	0.223625	-0.279834	-0.520399	-2.41646	1.15539	0.00682727	-0.0579587	-0.000507582	-0.146144	0.0120794	-0.186793	-0.119303	-0.201664	0.318982	-0.10581	0.0151638	0.014934
2006-07-15	2006	7	-5.04441	6.61558	-0.311658		-3.47653	-0.770643	0.435357	-0.461338	0.00546613	-0.0527337	-0.339896	1.9146	-0.0655068	0.129014	-0.247477	-0.0970513	-0.538412	2.7848	-0.637362	0.00684667	0.128911	0.00566269	-0.135885	-0.525196	0.0809114	-0.122464	2.14844	0.167485	-0.105746	1.1767	-0.148484
2006-08-15	2006	8	-5.17587	14.8583	-2.66263		-3.55978	1.79107	0.182728	-0.490228	-0.252264	-0.0219994	-0.343709	3.26179	-0.812001	0.130444	-0.677755	0.0871173	-0.545512	6.3223	-1.40676	0.00681788	-0.00738964	-0.00220211	-0.135327	-0.607975	0.141963	-0.132832	3.87476	-0.371876	-0.105739	1.15377	-0.459599
2006-09-15	2006	9	-5.08426	13.4159	-1.15647		-3.60827	2.88216	0.0187756	-0.513933	-0.261173	-0.00165795	-0.334261	3.25406	-0.769905	0.0849393	-0.420887	0.239046	-0.462765	5.26841	-0.174721	0.00679316	0.114929	0.00335463	-0.111118	-0.6066	0.117221	-0.0417449	2.80075	-0.479637	-0.103913	0.384256	-0.10902
2006-10-15	2006	10	-4.96889	4.82113	-1.58351		-3.63606	2.54356	-0.22787	-0.536159	-0.204327	-0.0122914	-0.32057	1.14868	-0.322479	0.0630952	-0.0901077	0.190755	-0.39203	1.55662	-0.644299	0.00676844	0.114848	0.00346077	-0.0554751	-0.537809	0.0648542	0.00444574	0.547555	-0.670501	-0.102919	-0.257874	0.03486
2006-11-15	2006	11	-4.95274	0.0124608	-0.11255		-3.66466	1.82116	-0.0989285	-0.5609	-0.161024	-0.0123023	-0.309891	0.268269	-0.0918465	0.0619792	0.063054	-0.0127916	-0.358431	0.418968	0.0573223	0.00669771	-0.0330668	-0.000186074	-0.0333525	-0.400604	0.0716671	0.00854795	-1.5966	-0.126078	-0.102742	-0.367706	0.100715
2006-12-15	2006	12	-4.99065	-2.5278	-0.0897762	Soil Moisture	-3.69068	0.856806	-0.150303	-0.584558	-0.11034	-0.00369144	-0.305047	-0.879766	0.0449718	0.0588409	0.190087	0.00735551	-0.345408	-0.17494	-0.199945	0.00681602	-0.131551	-0.00543715	-0.0268902	-0.27995	0.121216	-6.27395e-05	-1.63038	-0.00628608	-0.103665	-0.367764	0.102283
2007-01-15	2007	1	-5.16997	-4.23381	-0.460721	-1.92402	-3.76321	-0.229635	-0.304077	-0.613875	-0.042418	-0.00242152	-0.33401	-1.48578	0.180316	0.0747618	0.21654	0.117743	-0.404185	-1.0937	-0.19152	0.00684249	0.0578767	0.000174266	-0.0141666	0.016851	-0.0892063	-0.015012	-1.30878	-0.274119	-0.107111	-0.364755	0.102442
2007-02-15	2007	2	-5.21919	-5.25462	1.25161	-2.20912	-3.81983	-0.54887	-0.111816	-0.63757	0.0421368	0.0247011	-0.320296	-1.6771	0.301843	0.0727784	-0.00549734	-0.246818	-0.371093	-1.93224	0.52391	0.00670537	0.0578734	0.000502508	-0.0145413	0.437659	-0.0764003	-0.0452633	-1.26975	0.73585	-0.0900781	-0.358851	0.0998123
2007-03-15	2007	3	-5.03431	-6.43354	2.09274	-1.90229	-3.84758	-1.0008	0.119087	-0.66534	0.122301	0.0469309	-0.211504	-1.80114	0.299798	0.0532655	0.0525351	-0.296051	-0.319731	-3.04558	0.941798	0.00645292	0.0578392	0.000789175	-0.0145568	0.784797	0.256567	-0.0175091	-1.2447	0.702491	-0.0178032	-0.358798	0.0213853
2007-04-15	2007	4	-4.99219	-7.90418	1.25328	-1.08574	-3.87011	-1.95896	-0.041594	-0.693364	0.192323	0.0298768	-0.122722	-1.75865	0.189359	0.0205447	0.225936	0.0926697	-0.353458	-3.72349	0.744913	0.00626226	-0.217119	-0.00699046	-0.0139908	0.946051	0.0462601	0.0316422	-1.24914	0.206019	0.00300134	-0.361135	-0.00725317
2007-05-15	2007	5	-4.80592	-8.44726	0.878061	0.0217363	-3.86341	-2.94233	0.0644822	-0.721853	0.261873	0.0358693	-0.0458247	-1.65481	0.117412	-0.00665092	0.487845	0.0143932	-0.285936	-4.06251	0.681548	0.0060716	-0.0842509	0.00232836	-0.0105061	0.730885	-0.129178	0.106134	-0.853385	0.123228	0.0160623	-0.330594	-0.0320033
2007-06-15	2007	6	-4.83869	-5.68386	-0.0992651	1.12338	-3.87959	-2.89435	0.0861446	-0.750852	0.248317	-0.00767596	-0.0111393	-0.612639	-0.0587407	-0.00873305	0.223625	0.0485952	-0.312273	-2.41646	0.241943	0.00605005	-0.0579587	0.00058733	-0.0150068	0.0120794	-0.165247	0.116761	-0.201664	-0.0964731	0.016075	0.0151638	-0.148312
2007-07-15	2007	7	-4.87134	6.61558	-1.07536	1.92402	-3.89649	-0.770643	0.175876	-0.780727	0.00546613	-0.0176891	0.00486036	1.9146	-0.245685	-0.0120868	-0.247477	0.0202499	-0.30211	2.7848	-0.476558	0.00605638	0.128911	0.00480747	-0.0245702	-0.525196	-0.0348991	0.117683	2.14844	-0.435678	0.0160337	1.1767	-0.0658627
2007-08-15	2007	8	-4.87306	14.8583	-0.74681	2.20912	-3.91775	1.79107	0.207692	-0.81356	-0.252264	-0.0319119	0.016696	3.26179	0.133087	-0.0134855	-0.677755	-0.00310818	-0.279646	6.3223	-1.0563	0.00724227	-0.00738964	-0.00565591	-0.0205909	-0.607975	0.0270408	0.131814	3.87476	-0.303471	0.016216	1.15377	0.285745
2007-09-15	2007	9	-5.04725	13.4159	-0.688146	1.90229	-3.95499	2.88216	0.0952323	-0.851108	-0.261173	-0.00076754	0.0127288	3.25406	-0.0515076	0.00894535	-0.420887	-0.0776096	-0.32119	5.26841	-0.721014	0.00842447	0.114929	-0.000564566	-0.0223026	-0.6066	0.0351976	0.057744	2.80075	0.0106903	0.014481	0.384256	0.0222399
2007-10-15	2007	10	-5.37253	4.82113	1.05543	1.08574	-4.02961	2.54356	0.246007	-0.892568	-0.204327	0.00225247	-0.00173469	1.14868	0.281455	0.0464883	-0.0901077	-0.118985	-0.418825	1.55662	0.192757	0.00960667	0.114848	-0.00166535	-0.0723984	-0.537809	0.123594	-0.0269048	0.547555	0.254751	0.0134058	-0.257874	0.075266
2007-11-15	2007	11	-5.59665	0.0124608	0.138054	-0.0217363	-4.10013	1.82116	0.142445	-0.932639	-0.161024	0.0114413	-0.0120431	0.268269	0.0265308	0.0451854	0.063054	-0.0209833	-0.470639	0.418968	-0.146515	0.00967032	-0.0330668	-0.00341729	-0.101375	-0.400604	0.0856815	-0.0479168	-1.5966	0.0579122	0.0132336	-0.367706	-0.0151077
2007-12-15	2007	12	-5.81942	-2.5278	0.347204	-1.12338	-4.19825	0.856806	0.154384	-0.9726	-0.11034	0.0258613	-0.0265886	-0.879766	-0.0414908	0.0535663	0.190087	-0.0276148	-0.513363	-0.17494	0.0899682	0.0104726	-0.131551	-0.00901784	-0.110952	-0.27995	0.0905174	-0.0744568	-1.63038	0.0791725	0.0127427	-0.367764	-0.0146199
2008-01-15	2008	1	-5.39162	-4.23381	-0.259621		-4.18145	-0.229635	-0.140971	-1.01365	-0.042418	0.00334599	0.0740051	-1.48578	-0.0856716	0.0186025	0.21654	0.157117	-0.264435	-1.0937	-0.0616928	0.01143	0.0578767	0.00981755	-0.118813	0.016851	0.0631907	0.0054796	-1.30878	-0.125045	0.077196	-0.364755	-0.0796778
2008-02-15	2008	2	-4.63657	-5.25462	-1.42137		-4.00282	-0.54887	-0.37561	-1.05575	0.0421368	-0.00768309	0.262418	-1.6771	-0.328476	-0.0217063	-0.00549734	0.116838	0.0389833	-1.93224	-0.384705	0.0130168	0.0578734	0.00837742	-0.119293	0.437659	0.00781212	0.0811189	-1.26975	-0.279369	0.167463	-0.358851	-0.178548
2008-03-15	2008	3	-4.11506	-6.43354	-2.72983		-3.82962	-1.0008	-0.794386	-1.09459	0.122301	-0.0213484	0.379602	-1.80114	-0.464871	-0.0281102	0.0525351	0.23584	0.251099	-3.04558	-0.800648	0.0137995	0.0578392	0.007629	-0.119304	0.784797	-0.239836	0.117335	-1.2447	-0.448138	0.194725	-0.358798	-0.204045
2008-04-15	2008	4	-4.05884	-7.90418	-2.36948		-3.70198	-1.95896	-1.05592	-1.12869	0.192323	-0.0156449	0.374167	-1.75865	-0.431231	-0.0186035	0.225936	0.116184	0.241539	-3.72349	-0.47185	0.0151274	-0.217119	-0.0150918	-0.119112	0.946051	-0.196341	0.0933291	-1.24914	-0.107812	0.185364	-0.361135	-0.191682
2008-05-15	2008	5	-4.05384	-8.44726	-2.54734		-3.60357	-2.94233	-1.37286	-1.16269	0.261873	-0.00282481	0.336851	-1.65481	-0.439809	-0.00020027	0.487845	0.108513	0.244004	-4.06251	-0.361086	0.0164559	-0.0842509	0.00157141	-0.123266	0.730885	-0.131341	0.063831	-0.853385	-0.15295	0.174738	-0.330594	-0.196571
2008-06-15	2008	6	-3.95323	-5.68386	4.1489		-3.515	-2.89435	-0.0767786	-1.19665	0.248317	-0.0544321	0.319938	-0.612639	0.817306	0.0168441	0.223625	-0.396547	0.302246	-2.41646	2.61456	0.0174868	-0.0579587	0.000638954	-0.126512	0.0120794	-0.14807	0.0537202	-0.201664	0.925805	0.174704	0.0151638	0.466498
2008-07-15	2008	7	-3.88471	6.61558	6.99867		-3.43051	-0.770643	1.85345	-1.23091	0.00546613	-0.0728048	0.312613	1.9146	1.70752	0.0288523	-0.247477	-0.504395	0.328418	2.7848	2.53394	0.0177479	0.128911	0.0121584	-0.134089	-0.525196	0.0688519	0.0484455	2.14844	0.541232	0.174715	1.1767	0.858654
2008-08-15	2008	8	-3.85267	14.8583	4.4909		-3.36205	1.79107	1.73036	-1.25887	-0.252264	-0.0526165	0.304872	3.26179	1.25112	0.0322048	-0.677755	-0.125645	0.342917	6.3223	0.866529	0.0160286	-0.00738964	-0.00505062	-0.149871	-0.607975	0.156193	0.0475234	3.87476	0.215408	0.174564	1.15377	0.454544
2008-09-15	2008	9	-3.85863	13.4159	-1.2022		-3.31204	2.88216	0.984026	-1.28659	-0.261173	0.0254741	0.300947	3.25406	-0.404949	0.0452546	-0.420887	0.000161301	0.3432	5.26841	-1.50012	0.0143092	0.114929	0.00948528	-0.180656	-0.6066	0.195861	0.0424077	2.80075	-0.262041	0.174542	0.384256	-0.250155
2008-10-15	2008	10	-3.85881	4.82113	-0.398248		-3.26338	2.54356	0.660679	-1.3133	-0.204327	0.0149808	0.296986	1.14868	-0.465062	0.0428349	-0.0901077	0.105506	0.352389	1.55662	-0.548883	0.0125898	0.114848	0.0112941	-0.204492	-0.537809	0.205837	0.0430447	0.547555	-0.169175	0.174511	-0.257874	-0.213341
2008-11-15	2008	11	-3.88331	0.0124608	-0.367935		-3.21744	1.82116	0.322499	-1.34071	-0.161024	0.0119801	0.296169	0.268269	-0.484627	0.0498301	0.063054	0.178905	0.342892	0.418968	-0.261146	0.0124623	-0.0330668	0.00616191	-0.228764	-0.400604	0.174121	0.0277287	-1.5966	-0.139062	0.174509	-0.367706	-0.17679
2008-12-15	2008	12	-3.89079	-2.5278	-0.759245	Runoff Storage	-3.17915	0.856806	0.149196	-1.36701	-0.11034	0.00924802	0.296895	-0.879766	-0.452882	0.0503838	0.190087	0.119666	0.34059	-0.17494	-0.449911	0.0111417	-0.131551	-0.00655357	-0.248813	-0.27995	0.137449	0.029558	-1.63038	-0.0881391	0.175592	-0.367764	-0.177339
2009-01-15	2009	1	-4.69456	-4.23381	-0.572152	-0.59552	-3.30358	-0.229635	-0.197306	-1.38785	-0.042418	0.0420149	0.14704	-1.48578	-0.2516	0.100112	0.21654	0.115838	-0.0257425	-1.0937	-0.126399	0.00958597	0.0578767	-0.00897037	-0.23908	0.016851	-0.00593126	-0.0918208	-1.30878	-0.0388104	0.0967557	-0.364755	-0.101058
2009-02-15	2009	2	-5.97845	-5.25462	-0.150972	-0.622359	-3.69005	-0.54887	-0.0882765	-1.40813	0.0421368	0.0120154	-0.136571	-1.6771	0.0234161	0.162458	-0.00549734	0.0892712	-0.450199	-1.93224	0.107866	0.00637047	0.0578734	-0.00560931	-0.23521	0.437659	-0.24568	-0.17438	-1.26975	-0.0852574	-0.0527388	-0.358851	0.0413972
2009-03-15	2009	3	-7.14708	-6.43354	0.299961	-0.482437	-4.13899	-1.0008	0.0989656	-1.43155	0.122301	-0.00492551	-0.372095	-1.80114	0.239302	0.186305	0.0525351	-0.00761154	-0.77084	-3.04558	0.331566	0.00436853	0.0578392	-0.00357316	-0.235198	0.784797	-0.409974	-0.276092	-1.2447	-0.0470678	-0.112981	-0.358798	0.103284
2009-04-15	2009	4	-7.58525	-7.90418	0.862921	-0.213246	-4.50007	-1.95896	0.293448	-1.46024	0.192323	-0.0129965	-0.409245	-1.75865	0.342373	0.182633	0.225936	-0.00111011	-0.770568	-3.72349	0.426295	0.00154318	-0.217119	-0.00303726	-0.235854	0.946051	-0.370872	-0.290086	-1.24914	0.0918114	-0.103341	-0.361135	0.0969955
2009-05-15	2009	5	-7.83329	-8.44726	1.14233	0.113084	-4.83027	-2.94233	0.313323	-1.48481	0.261873	0.00369928	-0.408162	-1.65481	0.313908	0.170482	0.487845	-0.0555252	-0.725379	-4.06251	0.580671	-0.00128285	-0.0842509	0.00346271	-0.233897	0.730885	-0.261297	-0.232966	-0.853385	0.165798	-0.0869901	-0.330594	0.0781636
2009-06-15	2009	6	-8.19809	-5.68386	-1.25147	0.409113	-5.13093	-2.89435	0.0459835	-1.50837	0.248317	0.00720963	-0.394443	-0.612639	-0.266569	0.144854	0.223625	0.0721775	-0.794536	-2.41646	-0.684649	-0.00294824	-0.0579587	0.00240559	-0.230381	0.0120794	0.0725938	-0.194497	-0.201664	-0.282524	-0.0868231	0.0151638	-0.218015
2009-07-15	2009	7	-8.51022	6.61558	-3.78247	0.59552	-5.43326	-0.770643	-0.781501	-1.53222	0.00546613	-0.0148992	-0.374907	1.9146	-1.0083	0.131646	-0.247477	0.140969	-0.810657	2.7848	-1.42046	-0.003735	0.128911	-0.00494468	-0.223516	-0.525196	0.204722	-0.176789	2.14844	-0.224241	-0.0867728	1.1767	-0.673793
2009-08-15	2009	8	-8.80839	14.8583	-4.5769	0.622359	-5.70053	1.79107	-1.31837	-1.56143	-0.252264	-0.0310561	-0.366903	3.26179	-0.903386	0.118287	-0.677755	0.074432	-0.819053	6.3223	-1.81919	-0.00369377	-0.00738964	-0.00935146	-0.217869	-0.607975	0.22433	-0.17054	3.87476	-0.787072	-0.0866338	1.15377	-0.00716774
2009-09-15	2009	9	-9.05474	13.4159	-1.26414	0.482437	-5.95452	2.88216	-0.706505	-1.58842	-0.261173	-0.0169803	-0.360352	3.25406	-0.189454	0.102978	-0.420887	-0.101625	-0.816966	5.26841	-0.33669	-0.00365052	0.114929	-0.00645931	-0.196825	-0.6066	0.204168	-0.150683	2.80075	-0.23688	-0.0862899	0.384256	0.126366
2009-10-15	2009	10	-9.30328	4.82113	2.06974	0.213246	-6.20476	2.54356	-0.360337	-1.61654	-0.204327	0.0233783	-0.355833	1.14868	0.200758	0.109619	-0.0901077	-0.107084	-0.833797	1.55662	1.17957	-0.00360727	0.114848	-0.00642115	-0.178398	-0.537809	0.203223	-0.133958	0.547555	0.69327	-0.0859928	-0.257874	0.243367
2009-11-15	2009	11	-9.62986	0.0124608	1.00104	-0.113084	-6.47818	1.82116	-0.0246691	-1.64482	-0.161024	0.0333558	-0.356519	0.268269	0.332684	0.12771	0.063054	-0.206515	-0.864525	0.418968	0.116386	-0.00359408	-0.0330668	0.00223356	-0.186831	-0.400604	0.17438	-0.137256	-1.5966	0.487547	-0.0858472	-0.367706	0.0855694
2009-12-15	2009	12	-9.95273	-2.5278	1.5571	-0.409113	-6.74285	0.856806	0.0849668	-1.67491	-0.11034	0.0309749	-0.358568	-0.879766	0.437022	0.142171	0.190087	-0.130621	-0.892654	-0.17494	0.589889	-0.0031544	-0.131551	-0.00169862	-0.193656	-0.27995	0.164674	-0.142432	-1.63038	0.296352	-0.0866633	-0.367764	0.0855209
2010-01-15	2010	1	-10.2473	-4.23381	1.40259		-7.0157	-0.229635	0.307536	-1.70477	-0.042418	0.00846436	-0.352587	-1.48578	0.344071	0.158313	0.21654	-0.102671	-0.907048	-1.0937	0.654145	-0.00268678	0.0578767	0.00379719	-0.195699	0.016851	0.0184476	-0.144889	-1.30878	0.0892447	-0.0822123	-0.364755	0.0795787
2010-02-15	2010	2	-10.3605	-5.25462	1.27473		-7.29027	-0.54887	0.464092	-1.73092	0.0421368	0.0108217	-0.3052	-1.6771	0.27066	0.180265	-0.00549734	-0.112241	-0.862436	-1.93224	0.545157	-0.00176546	0.0578734	0.00304562	-0.193496	0.437659	-0.0348643	-0.118107	-1.26975	0.0967474	-0.0385105	-0.358851	0.0312948
2010-03-15	2010	3	-10.2245	-6.43354	0.39498		-7.47328	-1.0008	0.430325	-1.75936	0.122301	-0.0145675	-0.220397	-1.80114	0.141822	0.162823	0.0525351	0.0955668	-0.714556	-3.04558	0.0733039	-0.00128869	0.0578392	0.00260307	-0.193419	0.784797	-0.230629	-0.0083179	-1.2447	-0.114137	-0.016724	-0.358798	0.0105921
2010-04-15	2010	4	-9.69042	-7.90418	-0.950835		-7.56804	-1.95896	0.0804153	-1.78669	0.192323	-0.0258409	-0.037536	-1.75865	-0.0375614	0.142827	0.225936	0.255789	-0.407544	-3.72349	-0.305465	-0.000563574	-0.217119	-0.000772271	-0.19358	0.946051	-0.514341	0.0959544	-1.24914	-0.333808	0.0647663	-0.361135	-0.0693641
2010-05-15	2010	5	-9.80431	-8.44726	-0.761102		-7.65162	-2.94233	-0.0413528	-1.81754	0.261873	-0.0246261	0.0369511	-1.65481	-0.1558	0.14733	0.487845	0.141157	-0.420872	-4.06251	-0.061388	0.000161536	-0.0842509	0.00729447	-0.198078	0.730885	-0.379015	0.0396348	-0.853385	-0.168918	0.0597187	-0.330594	-0.0783386
2010-06-15	2010	6	-9.77905	-5.68386	-3.20525		-7.73386	-2.89435	-0.625261	-1.84922	0.248317	-0.0102995	0.0727204	-0.612639	-0.661953	0.157499	0.223625	0.253232	-0.323498	-2.41646	-1.32841	0.000561526	-0.0579587	0.00450731	-0.200563	0.0120794	0.0182574	0.0373408	-0.201664	-0.543843	0.0599576	0.0151638	-0.311384
2010-07-15	2010	7	-9.84434	6.61558	-3.80631		-7.80171	-0.770643	-1.70797	-1.8797	0.00546613	0.0188068	0.0925639	1.9146	-0.907133	0.154457	-0.247477	0.38158	-0.304854	2.7848	-1.39092	0.000751056	0.128911	0.00162509	-0.206489	-0.525196	0.214127	0.040535	2.14844	-0.120182	0.0600988	1.1767	-0.296243
2010-08-15	2010	8	-9.91513	14.8583	-1.83902		-7.85825	1.79107	-1.3567	-1.91039	-0.252264	-0.0233883	0.101542	3.26179	-0.354185	0.155462	-0.677755	-0.17204	-0.313156	6.3223	-0.550531	0.00157791	-0.00738964	-0.00890187	-0.201288	-0.607975	0.208682	0.0492292	3.87476	0.310632	0.0601442	1.15377	0.107492
2010-09-15	2010	9	-9.97801	13.4159	6.0684		-7.91074	2.88216	0.112505	-1.93939	-0.261173	0.00597271	0.107156	3.25406	1.53736	0.156288	-0.420887	-0.394894	-0.311042	5.26841	2.84153	0.00239519	0.114929	-0.00380368	-0.189722	-0.6066	0.195126	0.0468769	2.80075	0.816827	0.0601744	0.384256	0.957785
2010-10-15	2010	10	-9.97669	4.82113	1.37648		-7.95021	2.54356	0.382176	-1.96679	-0.204327	0.00348588	0.113423	1.14868	0.625348	0.146224	-0.0901077	-0.0896564	-0.280155	1.55662	0.465992	0.00321246	0.114848	-0.00453954	-0.15438	-0.537809	0.125231	0.051814	0.547555	-0.168337	0.0601683	-0.257874	0.036635
2010-11-15	2010	11	-9.92213	0.0124608	1.59638		-7.96194	1.82116	0.472279	-1.99276	-0.161024	0.00117595	0.116905	0.268269	0.288491	0.114347	0.063054	-0.0711132	-0.23586	0.418968	0.656204	0.00324916	-0.0330668	0.000190192	-0.0959249	-0.400604	0.0536522	0.0696051	-1.5966	0.253158	0.0602715	-0.367706	-0.0576828
2010-12-15	2010	12	-9.85574	-2.5278	0.676611		-7.96087	0.856806	0.488775	-2.01917	-0.11034	0.0094289	0.127132	-0.879766	0.189444	0.0968411	0.190087	-0.121805	-0.202687	-0.17494	0.123647	0.00372834	-0.131551	-0.00630699	-0.0512432	-0.27995	-0.0488448	0.0883153	-1.63038	0.103935	0.0622242	-0.367764	-0.0616716
2011-01-15	2011	1	-9.44256	-4.23381	-0.251589		-7.86443	-0.229635	0.477804	-2.04284	-0.042418	-0.0217999	0.201428	-1.48578	-0.102203	0.0571015	0.21654	0.010608	-0.0397181	-1.0937	-0.312809	0.00424164	0.0578767	0.00679104	-0.030978	0.016851	-0.0838679	0.163349	-1.30878	-0.114664	0.109294	-0.364755	-0.111382
2011-02-15	2011	2	-8.62467	-5.25462	-1.21555		-7.56033	-0.54887	0.104269	-2.06543	0.0421368	-0.00263085	0.35614	-1.6771	-0.323321	-0.0105462	-0.00549734	0.0884799	0.303224	-1.93224	-0.595135	0.0053858	0.0578734	0.00570165	-0.0302025	0.437659	-0.0593648	0.204575	-1.26975	-0.254163	0.172531	-0.358851	-0.179385
2011-03-15	2011	3	-7.77357	-6.43354	-2.04022		-7.21437	-1.0008	-0.302218	-2.08017	0.122301	-0.0225243	0.522122	-1.80114	-0.52549	-0.0148328	0.0525351	0.152457	0.596325	-3.04558	-0.866922	0.00608826	0.0578392	0.00503342	-0.0300986	0.784797	0.0301619	0.199809	-1.2447	-0.263019	0.241565	-0.358798	-0.24777
2011-04-15	2011	4	-7.56282	-7.90418	-2.42372		-6.95987	-1.95896	-0.668629	-2.09867	0.192323	-0.0255094	0.514033	-1.75865	-0.54734	-0.00237861	0.225936	0.0184686	0.644338	-3.72349	-0.825815	0.00706812	-0.217119	-0.00796362	-0.0300364	0.946051	0.0235722	0.180344	-1.24914	-0.204704	0.182359	-0.361135	-0.185719
2011-05-15	2011	5	-7.35441	-8.44726	-2.41424		-6.73919	-2.94233	-0.940848	-2.11751	0.261873	-0.041605	0.515725	-1.65481	-0.511858	0.00671086	0.487845	0.0717039	0.661126	-4.06251	-0.745307	0.00804798	-0.0842509	0.00515819	-0.028718	0.730885	-0.0121957	0.166579	-0.853385	-0.0713387	0.172839	-0.330594	-0.168026
2011-06-15	2011	6	-7.16722	-5.68386	-0.858985		-6.5551	-2.89435	-0.646786	-2.1363	0.248317	-0.00724966	0.512093	-0.612639	-0.20977	0.0173264	0.223625	-0.0834695	0.709404	-2.41646	-0.405686	0.00857766	-0.0579587	0.00265085	-0.0284492	0.0120794	0.0893255	0.132491	-0.201664	0.261408	0.172778	0.0151638	0.140629
2011-07-15	2011	7	-6.97282	6.61558	3.13691		-6.39236	-0.770643	0.531853	-2.15694	0.00546613	0.0250216	0.498083	1.9146	0.54389	0.0300311	-0.247477	-0.305768	0.782465	2.7848	1.63706	0.00888316	0.128911	0.00722291	-0.0313036	-0.525196	0.0482477	0.115559	2.14844	0.299515	0.172793	1.1767	0.34991
2011-08-15	2011	8	-6.71552	14.8583	5.17451		-6.24802	1.79107	1.18468	-2.17669	-0.252264	0.0659599	0.498752	3.26179	1.24039	0.0145914	-0.677755	-0.0826074	0.888211	6.3223	1.76532	0.00850588	-0.00738964	-0.00740041	-0.0264011	-0.607975	0.0350427	0.152554	3.87476	0.150108	0.173002	1.15377	0.823049
2011-09-15	2011	9	-6.52135	13.4159	5.14074		-6.12096	2.88216	1.37669	-2.19675	-0.261173	0.0413435	0.497935	3.25406	1.04952	0.0183539	-0.420887	-0.10751	0.958334	5.26841	2.14831	0.00814501	0.114929	0.00220484	-0.0194611	-0.6066	0.0256111	0.160135	2.80075	0.469988	0.17295	0.384256	0.134533
2011-10-15	2011	10	-6.38949	4.82113	0.290229		-6.01521	2.54356	1.09537	-2.2165	-0.204327	0.0271122	0.494438	1.14868	0.264643	0.0193414	-0.0901077	0.1463	1.01666	1.55662	-0.629368	0.00778414	0.114848	0.00264713	-0.0255932	-0.537809	0.012265	0.156628	0.547555	-0.438324	0.172984	-0.257874	-0.190419
2011-11-15	2011	11	-6.22783	0.0124608	0.148385		-5.92121	1.82116	0.640533	-2.23626	-0.161024	0.0191664	0.495375	0.268269	-0.13357	0.02214	0.063054	0.14848	1.087	0.418968	-0.0873191	0.00778972	-0.0330668	0.00200581	-0.0250914	-0.400604	-0.0139559	0.169272	-1.5966	-0.255574	0.173183	-0.367706	-0.171332
2011-12-15	2011	12	-6.1677	-2.5278	-0.678735		-5.83751	0.856806	0.318304	-2.25657	-0.11034	-0.000771916	0.482803	-0.879766	-0.33435	0.0285024	0.190087	0.09899	1.1028	-0.17494	-0.305105	0.00749597	-0.131551	-0.0064086	-0.0102748	-0.27995	-0.124066	0.144482	-1.63038	-0.155409	0.170617	-0.367764	-0.169887
2012-01-15	2012	1	-6.50746	-4.23381	-0.0990169		-5.86899	-0.229635	0.214539	-2.28156	-0.042418	-0.0201258	0.40613	-1.48578	-0.298876	0.073758	0.21654	-0.191324	0.980968	-1.0937	-0.0645514	0.00726727	0.0578767	-0.000762005	-0.0150436	0.016851	-0.0409718	0.0661969	-1.30878	0.426425	0.123851	-0.364755	-0.123422
2012-02-15	2012	2	-7.25924	-5.25462	-0.250892		-6.23223	-0.54887	0.300823	-2.31067	0.0421368	0.0019417	0.284308	-1.6771	-0.261291	0.15175	-0.00549734	-0.0286668	0.75234	-1.93224	-0.20277	0.00656065	0.0578734	0.000196374	-0.0168279	0.437659	0.0105408	0.0348334	-1.26975	0.0065548	0.0707206	-0.358851	-0.0781995
2012-03-15	2012	3	-7.81296	-6.43354	-0.418567		-6.56229	-1.0008	0.314745	-2.34566	0.122301	0.00591714	0.209401	-1.80114	-0.254726	0.153703	0.0525351	-0.00422828	0.66354	-3.04558	-0.234175	0.00612085	0.0578392	0.000670398	-0.0169796	0.784797	-0.0565419	0.04049	-1.2447	-0.145789	0.0387297	-0.358798	-0.0445278
2012-04-15	2012	4	-8.07487	-7.90418	0.0282439		-6.83676	-1.95896	0.336193	-2.37807	0.192323	0.0168322	0.205155	-1.75865	-0.227217	0.148507	0.225936	-0.0988345	0.707735	-3.72349	-0.0451813	0.00553313	-0.217119	-0.00636171	-0.0169936	0.946051	0.0165509	0.0331632	-1.24914	0.0942047	0.056891	-0.361135	-0.0578583
2012-05-15	2012	5	-8.31427	-8.44726	-0.732816		-7.10078	-2.94233	0.425139	-2.41079	0.261873	0.0078786	0.178308	-1.65481	-0.325306	0.160148	0.487845	-0.00538388	0.78305	-4.06251	-0.677605	0.00494541	-0.0842509	0.00473581	-0.0173555	0.730885	0.154241	0.0305072	-0.853385	-0.232744	0.0577253	-0.330594	-0.0837052
2012-06-15	2012	6	-8.62455	-5.68386	-3.47882		-7.33867	-2.89435	-0.240902	-2.44371	0.248317	0.000281507	0.157137	-0.612639	-0.7749	0.145037	0.223625	0.331887	0.778702	-2.41646	-1.937	0.00471358	-0.0579587	0.00377045	-0.0184954	0.0120794	0.0221455	0.0331516	-0.201664	-0.578673	0.0576128	0.0151638	-0.305408
2012-07-15	2012	7	-8.91653	6.61558	-3.94072		-7.56931	-0.770643	-2.65009	-2.47573	0.00546613	-0.00548171	0.14527	1.9146	-0.565161	0.137755	-0.247477	0.522416	0.759556	2.7848	-1.08356	0.00444939	0.128911	0.00317733	-0.0119035	-0.525196	0.0074365	0.0357619	2.14844	0.00294995	0.0576396	1.1767	-0.172496
2012-08-15	2012	8	-9.23611	14.8583	1.05044		-7.80639	1.79107	-1.21764	-2.50596	-0.252264	-0.0246579	0.136964	3.26179	0.703296	0.150988	-0.677755	-0.195574	0.743508	6.3223	0.844413	0.00399324	-0.00738964	-0.00816546	-0.0139151	-0.607975	0.0207362	-0.00329756	3.87476	0.373838	0.0580295	1.15377	0.554132
2012-09-15	2012	9	-9.2994	13.4159	4.77595		-8.00878	2.88216	-0.0291981	-2.53348	-0.261173	-0.0108441	0.14912	3.25406	1.34739	0.123504	-0.420887	-0.27501	0.832705	5.26841	2.80428	0.00352914	0.114929	-0.000231884	0.0148584	-0.6066	-0.00887662	0.0588414	2.80075	0.48336	0.0603352	0.384256	0.465084
2012-10-15	2012	10	-9.3604	4.82113	0.38835		-8.19178	2.54356	0.103734	-2.56324	-0.204327	-0.0187815	0.161575	1.14868	0.275343	0.110247	-0.0901077	0.195086	0.901131	1.55662	0.38995	0.00306504	0.114848	0.000313627	0.0502202	-0.537809	-0.0678917	0.108179	0.547555	-0.421747	0.0602291	-0.257874	-0.0676523
2012-11-15	2012	11	-9.50606	0.0124608	-0.29675		-8.3533	1.82116	0.217885	-2.59425	-0.161024	-0.0178772	0.167361	0.268269	-0.0596065	0.107258	0.063054	-0.117968	0.910203	0.418968	0.037295	0.00307115	-0.0330668	0.00394238	0.0698557	-0.400604	-0.122581	0.123668	-1.5966	-0.178238	0.0600955	-0.367706	-0.0595952
2012-12-15	2012	12	-9.62847	-2.5278	-0.721731		-8.51527	0.856806	0.228481	-2.62422	-0.11034	-0.0173388	0.179472	-0.879766	-0.173427	0.107176	0.190087	-0.067073	0.93806	-0.17494	-0.370107	0.00281614	-0.131551	-0.00489907	0.068464	-0.27995	-0.123703	0.151149	-1.63038	-0.130753	0.0639055	-0.367764	-0.0628526
2013-01-15	2013	1	-9.04314	-4.23381	-1.39832		-8.54334	-0.229635	0.043925	-2.65303	-0.042418	-0.011462	0.328399	-1.48578	-0.320824	0.0568288	0.21654	-0.0155931	1.30105	-1.0937	-0.577214	0.00258673	0.0578767	-0.00155525	0.0541253	0.016851	-0.13428	0.263066	-1.30878	-0.239156	0.147202	-0.364755	-0.142095
2013-02-15	2013	2	-8.20297	-5.25462	-0.0666352		-8.2354	-0.54887	-0.124714	-2.68307	0.0421368	0.0440827	0.496957	-1.6771	-0.328059	-0.0142231	-0.00549734	-0.192499	1.65036	-1.93224	-0.0304294	0.00227566	0.0578734	-0.00108782	0.0532847	0.437659	0.28571	0.301121	-1.26975	0.485935	0.22575	-0.358851	-0.205561
2013-03-15	2013	3	-7.64886	-6.43354	-1.3147		-7.98451	-1.0008	-0.459079	-2.71291	0.122301	0.016097	0.551779	-1.80114	-0.447641	-0.0122679	0.0525351	0.00265237	1.92838	-3.04558	-0.677894	0.00218589	0.0578392	-0.000963834	0.0533977	0.784797	0.297423	0.30047	-1.2447	0.186286	0.22464	-0.358798	-0.231711
2013-04-15	2013	4	-8.01824	-7.90418	-1.77627		-7.86085	-1.95896	-0.577951	-2.74446	0.192323	0.011126	0.439155	-1.75865	-0.391792	0.0198776	0.225936	-0.00607475	1.73476	-3.72349	-0.963342	0.00195087	-0.217119	-0.0027061	0.0533017	0.946051	0.181881	0.191582	-1.24914	0.121654	0.146475	-0.361135	-0.149045
2013-05-15	2013	5	-7.65168	-8.44726	-2.86432		-7.70952	-2.94233	-0.90972	-2.77269	0.261873	0.0100469	0.459217	-1.65481	-0.460884	-0.0390589	0.487845	0.192847	1.83894	-4.06251	-1.39922	0.00171585	-0.0842509	0.00490528	0.0528545	0.730885	0.0673302	0.354876	-0.853385	-0.227343	0.162024	-0.330594	-0.142285
2013-06-15	2013	6	-7.44893	-5.68386	2.36951		-7.56141	-2.89435	-0.355079	-2.80091	0.248317	0.0117831	0.493778	-0.612639	0.67559	-0.0515791	0.223625	-0.0756676	1.84645	-2.41646	1.3511	0.00147027	-0.0579587	0.00426074	0.0526445	0.0120794	-0.221058	0.408516	-0.201664	0.388961	0.162153	0.0151638	0.58961
2013-07-15	2013	7	-7.26683	6.61558	4.49163		-7.41576	-0.770643	0.891676	-2.8293	0.00546613	-0.0124095	0.517047	1.9146	1.08575	-0.0589814	-0.247477	-0.13347	1.88467	2.7848	1.98314	0.00142605	0.128911	0.00246787	0.0472838	-0.525196	-0.0618388	0.424646	2.14844	0.0707279	0.162177	1.1767	0.665547
2013-08-15	2013	8	-7.04999	14.8583	5.51363		-7.26205	1.79107	1.24877	-2.85752	-0.252264	-0.0310733	0.531182	3.26179	0.966944	-0.0728273	-0.677755	0.0517027	1.93782	6.3223	2.98625	0.00124508	-0.00738964	-0.00649456	0.0422405	-0.607975	-0.0340626	0.467616	3.87476	-0.104888	0.162335	1.15377	0.436498
2013-09-15	2013	9	-7.00695	13.4159	-1.9491		-7.12438	2.88216	0.570289	-2.88805	-0.261173	-0.0349275	0.526023	3.25406	-0.381003	-0.0698968	-0.420887	0.304137	1.92773	5.26841	-0.614175	0.00107225	0.114929	-0.000595246	0.00503088	-0.6066	-0.000201045	0.454583	2.80075	-1.21904	0.160956	0.384256	-0.573511
2013-10-15	2013	10	-6.8519	4.82113	2.2786		-6.97397	2.54356	0.701837	-2.91655	-0.204327	-0.00427544	0.534177	1.14868	0.143489	-0.0890329	-0.0901077	-0.312872	1.96757	1.55662	0.573748	0.00089942	0.114848	-0.000341003	-0.0226285	-0.537809	-0.000409795	0.486362	0.547555	1.15961	0.161311	-0.257874	0.0178522
2013-11-15	2013	11	-6.73317	0.0124608	-0.636688		-6.83214	1.82116	0.47407	-2.94443	-0.161024	-0.00627479	0.536207	0.268269	-0.0137185	-0.0848724	0.063054	-0.0760797	1.99332	0.418968	-0.955793	0.000896142	-0.0330668	0.0031705	-0.0479296	-0.400604	-0.0073155	0.484687	-1.5966	0.104423	0.161111	-0.367706	-0.159062
2013-12-15	2013	12	-6.63384	-2.5278	-1.53117		-6.68291	0.856806	0.143927	-2.97159	-0.11034	-0.0106542	0.53248	-0.879766	-0.247213	-0.089317	0.190087	0.040593	1.99119	-0.17494	-0.964588	0.000817948	-0.131551	-0.00343157	-0.0568122	-0.27995	-0.062755	0.483573	-1.63038	-0.269621	0.158745	-0.367764	-0.157408
2014-01-15	2014	1	-7.16443	-4.23381	-0.67492		-6.629	-0.229635	-0.0259399	-3.0003	-0.042418	-0.00289867	0.40257	-1.48578	-0.225373	-0.0599029	0.21654	-0.0650127	1.67559	-1.0937	-0.313943	0.000715576	0.0578767	-0.00185569	-0.0357221	0.016851	-0.104953	0.402923	-1.30878	0.136628	0.0787082	-0.364755	-0.0717056
2014-02-15	2014	2	-8.15576	-5.25462	0.402698		-6.8428	-0.54887	0.134787	-3.02734	0.0421368	0.0220394	0.200451	-1.6771	-0.0934662	-0.0125256	-0.00549734	-0.159031	1.24658	-1.93224	0.25232	0.000295091	0.0578734	-0.00118122	-0.0310356	0.437659	-0.0764845	0.338902	-1.26975	0.291758	-0.0282618	-0.358851	0.0319057
2014-03-15	2014	3	-9.14598	-6.43354	2.04304		-7.10536	-1.0008	0.466702	-3.05301	0.122301	0.0141486	0.0276396	-1.80114	0.174351	-0.00128169	0.0525351	-0.237967	0.849003	-3.04558	0.879549	-2.77718e-05	0.0578392	-0.000824145	-0.0310044	0.784797	0.0499132	0.261372	-1.2447	0.606727	-0.0932932	-0.358798	0.0904853
2014-04-15	2014	4	-9.72063	-7.90418	1.35076		-7.38087	-1.95896	0.643973	-3.07845	0.192323	0.0106571	-0.0712636	-1.75865	0.142983	-0.0137078	0.225936	0.0774375	0.625706	-3.72349	0.454677	-0.000422536	-0.217119	-0.000372029	-0.0309612	0.946051	-0.0374695	0.31418	-1.24914	-0.0210451	-0.084836	-0.361135	0.0798644
2014-05-15	2014	5	-10.5151	-8.44726	1.19119		-7.71945	-2.94233	0.89098	-3.10483	0.261873	0.0162318	-0.180927	-1.65481	0.134542	0.0326943	0.487845	0.0677572	0.409157	-4.06251	0.00502273	-0.0008173	-0.0842509	0.0065001	-0.0207193	0.730885	0.0343125	0.171606	-0.853385	-0.0574379	-0.101838	-0.330594	0.0931863
2014-06-15	2014	6	-11.0461	-5.68386	-0.400432		-8.04074	-2.89435	0.771224	-3.13168	0.248317	-0.00193038	-0.249981	-0.612639	-0.139573	0.0340568	0.223625	0.191667	0.317893	-2.41646	-0.90759	-0.000942747	-0.0579587	0.0054453	-0.00312135	0.0120794	0.087789	0.130272	-0.201664	-0.300599	-0.10187	0.0151638	-0.106814
2014-07-15	2014	7	-11.4703	6.61558	-3.20086		-8.34429	-0.770643	-0.74547	-3.15743	0.00546613	-0.00883165	-0.288823	1.9146	-0.533812	0.0313666	-0.247477	0.344709	0.226477	2.7848	-1.50672	-0.00106171	0.128911	-9.02073e-05	0.0226748	-0.525196	0.0190083	0.142585	2.14844	-0.415453	-0.101818	1.1767	-0.354098
2014-08-15	2014	8	-11.84	14.8583	-1.57901		-8.62184	1.79107	-0.542084	-3.18357	-0.252264	-0.0130524	-0.306189	3.26179	-0.269418	0.0259328	-0.677755	0.0878699	0.131737	6.3223	0.0213899	-0.000765689	-0.00738964	-0.00835814	0.0642	-0.607975	-0.055647	0.152653	3.87476	-0.720289	-0.102134	1.15377	-0.0794097
2014-09-15	2014	9	-12.2455	13.4159	-3.60643		-8.89641	2.88216	-0.963829	-3.21214	-0.261173	-0.0161452	-0.318033	3.25406	-0.723786	0.0445582	-0.420887	0.0405686	0.011398	5.26841	-1.37741	-0.000475762	0.114929	-0.0037844	0.101927	-0.6066	-0.0965797	0.126378	2.80075	-0.257144	-0.102683	0.384256	-0.208384
2014-10-15	2014	10	-12.4804	4.82113	-1.62663		-9.15211	2.54356	-1.18301	-3.23675	-0.204327	-0.000558651	-0.316283	1.14868	-0.322017	0.0433301	-0.0901077	0.11159	-0.0185663	1.55662	-0.0386968	-0.000185835	0.114848	-0.00399292	0.162731	-0.537809	-0.0628661	0.136928	0.547555	-0.201839	-0.0995384	-0.257874	0.074683
2014-11-15	2014	11	-12.5566	0.0124608	-1.18514		-9.36354	1.82116	-0.850007	-3.26049	-0.161024	-0.0124823	-0.300268	0.268269	-0.00588721	0.0147158	0.063054	-0.159317	0.0265359	0.418968	-0.084182	-0.000155182	-0.0330668	0.00271646	0.243269	-0.400604	-0.0873388	0.182254	-1.5966	-0.0891569	-0.0989269	-0.367706	0.100589
2014-12-15	2014	12	-12.6698	-2.5278	-0.585669		-9.56229	0.856806	-0.619277	-3.286	-0.11034	-0.00519156	-0.28455	-0.879766	0.103717	0.00612631	0.190087	-0.0871334	0.0365472	-0.17494	-0.10694	7.66282e-05	-0.131551	-0.00411778	0.317052	-0.27995	-0.127065	0.202203	-1.63038	0.159506	-0.0989097	-0.367764	0.100866
2015-01-15	2015	1	-12.7916	-4.23381	0.516207		-9.7579	-0.229635	-0.2276	-3.3047	-0.042418	-0.0122059	-0.268684	-1.48578	0.237487	0.00399251	0.21654	-0.194114	0.0429944	-1.0937	0.18177	0.000352178	0.0578767	0.00205994	0.373374	0.016851	-0.0157464	0.209036	-1.30878	0.451332	-0.0900518	-0.364755	0.0932602
2015-02-15	2015	2	-12.5673	-5.25462	-0.0519354		-9.77992	-0.54887	-0.223022	-3.31767	0.0421368	-0.0304848	-0.205362	-1.6771	0.170217	-0.0302582	-0.00549734	0.0822074	0.191606	-1.93224	-0.136776	0.000960166	0.0578734	0.00163282	0.387778	0.437659	-0.0425729	0.241005	-1.26975	0.0743473	-0.0554621	-0.358851	0.0525164
2015-03-15	2015	3	-12.5954	-6.43354	2.67309		-9.83642	-1.0008	0.129402	-3.32736	0.122301	-0.00685034	-0.20378	-1.80114	0.426768	-0.0444887	0.0525351	-0.209498	0.233218	-3.04558	1.13576	0.00135548	0.0578392	0.00127173	0.388857	0.784797	0.359703	0.266029	-1.2447	0.728681	-0.0728625	-0.358798	0.107796
2015-04-15	2015	4	-12.9349	-7.90418	3.65122		-9.93301	-1.95896	0.659008	-3.34006	0.192323	-0.0125531	-0.262585	-1.75865	0.526492	0.00756771	0.225936	-0.287209	0.148499	-3.72349	1.47311	0.00190985	-0.217119	-0.00233657	0.389385	0.946051	0.50863	0.144164	-1.24914	0.692874	-0.0908142	-0.361135	0.093181
2015-05-15	2015	5	-13.2539	-8.44726	2.57209		-10.0188	-2.94233	0.805286	-3.35475	0.261873	-0.0399841	-0.313722	-1.65481	0.455951	0.0368186	0.487845	-0.0394411	0.0584339	-4.06251	0.475882	0.00246462	-0.0842509	0.0059999	0.380524	0.730885	0.518469	0.0520622	-0.853385	0.301494	-0.09692	-0.330594	0.0884743
2015-06-15	2015	6	-13.396	-5.68386	0.487188		-10.1034	-2.89435	0.486495	-3.36902	0.248317	0.010983	-0.347374	-0.612639	0.148206	0.0535589	0.223625	0.146559	0.05414	-2.41646	-0.566471	0.00275003	-0.0579587	0.00505912	0.371239	0.0120794	0.389298	0.0389438	-0.201664	-0.127268	-0.0967659	0.0151638	-0.00562231
2015-07-15	2015	7	-13.5892	6.61558	1.60941		-10.2103	-0.770643	0.856357	-3.3842	0.00546613	0.0623118	-0.366201	1.9146	0.303431	0.067383	-0.247477	-0.102316	0.0342581	2.7848	0.468844	0.00286259	0.128911	0.00328134	0.355283	-0.525196	-0.140761	0.00826298	2.14844	0.102491	-0.0965703	1.1767	0.0557303
2015-08-15	2015	8	-13.8954	14.8583	0.139024		-10.3543	1.79107	0.51242	-3.39652	-0.252264	0.0836667	-0.381548	3.26179	-0.175069	0.095882	-0.677755	-0.152846	-0.0198089	6.3223	0.672278	0.00305074	-0.00738964	-0.00743084	0.311124	-0.607975	-0.289618	-0.0564917	3.87476	-0.210856	-0.0967299	1.15377	-0.293618
2015-09-15	2015	9	-14.2394	13.4159	-5.68663		-10.5084	2.88216	-0.51103	-3.4105	-0.261173	0.0298286	-0.393086	3.25406	-1.3544	0.110835	-0.420887	0.598969	-0.0874451	5.26841	-2.2952	0.0032415	0.114929	-0.000849193	0.245846	-0.6066	-0.234161	-0.102949	2.80075	-1.4902	-0.0969163	0.384256	-0.429573
2015-10-15	2015	10	-14.8201	4.82113	-3.11394		-10.6927	2.54356	-0.671454	-3.42853	-0.204327	0.0149122	-0.422431	1.14868	-0.829509	0.141319	-0.0901077	0.364613	-0.262263	1.55662	-0.875784	0.00343226	0.114848	-0.000953798	0.135429	-0.537809	-0.141891	-0.194303	0.547555	-0.975827	-0.10005	-0.257874	0.00192555
2015-11-15	2015	11	-15.4898	0.0124608	0.0429188		-10.9406	1.82116	-0.288789	-3.44817	-0.161024	0.00395083	-0.453512	0.268269	-0.256467	0.180615	0.063054	-0.124333	-0.462092	0.418968	0.352918	0.00343561	-0.0330668	0.00255064	0.00568939	-0.400604	0.0388117	-0.27468	-1.5966	0.210356	-0.100437	-0.367706	0.103949
2015-12-15	2015	12	-15.9902	-2.5278	0.415696		-11.2052	0.856806	-0.2586	-3.46628	-0.11034	-0.00713833	-0.470267	-0.879766	0.0635054	0.190048	0.190087	-0.105166	-0.54078	-0.17494	0.231805	0.00353079	-0.131551	-0.0062212	-0.111853	-0.27995	0.110367	-0.289723	-1.63038	0.283262	-0.0996816	-0.367764	0.103985
2016-01-15	2016	1	-16.3325	-4.23381	0.383281		-11.4333	-0.229635	-0.280701	-3.49557	-0.042418	0.0308678	-0.471304	-1.48578	0.25595	0.174355	0.21654	-0.0224883	-0.522261	-1.0937	0.0982205	0.00365864	0.0578767	0.00101124	-0.204872	0.016851	0.032596	-0.279847	-1.30878	0.163159	-0.103385	-0.364755	0.104679
2016-02-15	2016	2	-16.2005	-5.25462	-0.546862		-11.5685	-0.54887	-0.283365	-3.53203	0.0421368	0.016099	-0.379829	-1.6771	0.206226	0.158518	-0.00549734	0.0728673	-0.376857	-1.93224	-0.379946	0.0039318	0.0578734	0.000950277	-0.228174	0.437659	-0.209959	-0.24755	-1.26975	0.00541718	-0.0300896	-0.358851	0.0249066
2016-03-15	2016	3	-15.692	-6.43354	-1.1994		-11.5732	-1.0008	-0.345696	-3.57138	0.122301	0.0208472	-0.200692	-1.80114	0.0715386	0.1576	0.0525351	-0.045786	-0.147147	-3.04558	-0.581686	0.00409457	0.0578392	0.000821721	-0.229236	0.784797	-0.347209	-0.198747	-1.2447	0.0972086	0.0667211	-0.358798	-0.0693917
2016-04-15	2016	4	-14.967	-7.90418	-2.35253		-11.5015	-1.95896	-0.747405	-3.61177	0.192323	0.0234968	0.0237013	-1.75865	-0.13277	0.0921431	0.225936	0.0997787	0.211535	-3.72349	-0.98787	0.00433227	-0.217119	-0.00471871	-0.22972	0.946051	-0.429136	-0.0649287	-1.24914	-0.0625631	0.109152	-0.361135	-0.11143
2016-05-15	2016	5	-14.4411	-8.44726	-2.24561		-11.4059	-2.94233	-0.982372	-3.6523	0.261873	0.0402428	0.204289	-1.65481	-0.263112	0.0335374	0.487845	0.0770253	0.406567	-4.06251	-0.816516	0.00456958	-0.0842509	0.00503711	-0.233437	0.730885	-0.278076	0.079726	-0.853385	0.0933219	0.121833	-0.330594	-0.121213
2016-06-15	2016	6	-14.2846	-5.68386	-2.73222		-11.3512	-2.89435	-1.00325	-3.6936	0.248317	-0.0159662	0.292207	-0.612639	-0.503823	0.0354891	0.223625	-0.0236805	0.472461	-2.41646	-0.762558	0.0047152	-0.0579587	0.0046281	-0.249278	0.0120794	-0.106422	0.0826683	-0.201664	-0.0524911	0.12188	0.0151638	-0.268709
2016-07-15	2016	7	-14.1557	6.61558	3.76011		-11.2851	-0.770643	0.309644	-3.73598	0.00546613	-0.0234461	0.334455	1.9146	0.700469	0.0337799	-0.247477	-0.258754	0.562628	2.7848	1.68532	0.00479798	0.128911	0.00462387	-0.269727	-0.525196	0.204636	0.0776164	2.14844	0.420709	0.121843	1.1767	0.716862
2016-08-15	2016	8	-14.0452	14.8583	6.39105		-11.2128	1.79107	1.31355	-3.78338	-0.252264	-0.00166422	0.354718	3.26179	1.23831	0.0331318	-0.677755	-0.101111	0.638033	6.3223	2.77096	0.0049873	-0.00738964	-0.00741413	-0.284834	-0.607975	0.293595	0.0827213	3.87476	0.235562	0.122134	1.15377	0.649247
2016-09-15	2016	9	-13.9193	13.4159	2.69356		-11.139	2.88216	0.980873	-3.83115	-0.261173	-0.0341296	0.367501	3.25406	0.577735	0.0301151	-0.420887	-0.105797	0.716023	5.26841	1.20553	0.00517708	0.114929	6.76119e-05	-0.286222	-0.6066	0.292095	0.0960339	2.80075	-0.0833567	0.122127	0.384256	-0.13945
2016-10-15	2016	10	-13.8061	4.82113	2.18269		-11.0734	2.54356	0.855707	-3.87763	-0.204327	-0.0223724	0.373367	1.14868	0.541747	0.0280215	-0.0901077	-0.225359	0.791003	1.55662	0.411326	0.00536687	0.114848	-4.07592e-05	-0.278947	-0.537809	0.227874	0.103758	0.547555	0.461969	0.122284	-0.257874	-0.0682348
2016-11-15	2016	11	-13.6967	0.0124608	0.127138		-11.01	1.82116	0.436858	-3.92252	-0.161024	-0.0173765	0.380058	0.268269	-0.0350226	0.0240636	0.063054	0.055639	0.85324	0.418968	-0.171683	0.00537019	-0.0330668	0.00236361	-0.269861	-0.400604	0.124276	0.120134	-1.5966	-0.149151	0.122827	-0.367706	-0.118751
2016-12-15	2016	12	-13.6322	-2.5278	-0.394544		-10.945	0.856806	0.274196	-3.9669	-0.11034	-0.0149721	0.383958	-0.879766	-0.283744	0.0268568	0.190087	0.0375153	0.887739	-0.17494	-0.114713	0.00546946	-0.131551	-0.00716655	-0.258949	-0.27995	0.0120762	0.11269	-1.63038	-0.179773	0.121919	-0.367764	-0.118052
2017-01-15	2017	1	-13.6273	-4.23381	-0.996934		-10.8912	-0.229635	0.0451253	-4.00641	-0.042418	-0.0271334	0.379784	-1.48578	-0.351976	0.0269152	0.21654	0.117174	0.877849	-1.0937	-0.397021	0.0055967	0.0578767	0.00134501	-0.246854	0.016851	-0.106715	0.111081	-1.30878	-0.166511	0.115971	-0.364755	-0.11119
[truncated: 368 more rows]

## Sheet: Brahmaputra
Date	Year	Month	TWS_anom	TWS-GRACE	TWS		Aqf_Storage	glVolume	grdWater	irrRffStorage	resStorage	ricePaddyStrg	snowPack	soilMoist	surfRffStorage	UGW	smResStrg	endoStrg		precip	discharge	evapotrans	runoff	baseflow	surfRunoff	glMelt	irrigationGross	domUseGross	indUseGross	stkUseGross
[truncated: 349 more rows]

[truncated: 5 more sheets: Brahmaputra-TSA, COV-Glacier, Study-Graphs, Aquifer-Irr, readme]
